# Supplementary material for: Melting Point Distribution Analysis of Globally Approved and Discontinued Drugs: A Research for Improving the Chance of Success of Drug Design and Discovery
Source: PubMed Central journal article supplement — ChemistryOpen. 2016 Mar 21;5(4):357–68. doi: 10.1002/open.201600015 (PMC4981057; doi:10.1002/open.201600015), 2016-03-21
Supplement: OPEN-5-357-s002.pdf [file OPEN-5-357-s002.pdf]

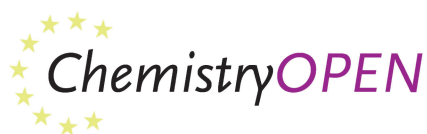

## Supporting Information

© 2016 The Authors. Published by Wiley-VCH Verlag GmbH & Co. KGaA, Weinheim

### **Melting Point Distribution Analysis of Globally Approved and Discontinued Drugs: A Research for Improving the Chance of Success of Drug Design and Discovery**

Fei Mao<sup>+</sup>, Qingya Kong<sup>+</sup>, Wei Ni, Xiang Xu, Dazheng Ling, Zhengyu Lu, and Jian Li<sup>\*[a]</sup>

open\_201600015\_sm\_miscellaneous\_information.pdf  
open\_201600015\_sm\_Database.xls

## SUPPORTING INFORMATION

**Approved Drugs** (pages 1–77)

**Discontinued Drugs** (pages 78–96)

All entries also available in the Excel file provided with this document.

### Approved Drugs

| Number | Common Name            | Indication         | CAS Number  | Oral | MP (°C) | MW  | ClogP | HBA |
|--------|------------------------|--------------------|-------------|------|---------|-----|-------|-----|
| 1      | Abanoquil              | Adrenergic         | 90402-40-7  |      | 230     | 395 | 3.32  | 7   |
| 2      | Ablukast               | Bronchodilator     | 96566-25-5  |      | 114     | 499 | 4.71  | 8   |
| 3      | Acadesine              | Cardiotonic        | 2627-69-2   | Y    | 215     | 258 | -2.29 | 9   |
| 4      | Acediasulfone Sodium   | Antibiotic         | 80-03-5     |      | 196     | 306 | 0.44  | 6   |
| 5      | Acefylline Piperazine  | Bronchodilator     | 652-37-9    |      | 271     | 238 | -0.78 | 8   |
| 6      | Acemetacin             | Antiinflammatory   | 53164-05-9  | Y    | 150     | 416 | 4.49  | 7   |
| 7      | Acenocoumarol          | Anticoagulant      | 152-72-7    | Y    | 198     | 353 | 2.97  | 7   |
| 8      | Aceperone              | Adrenergic         | 807-31-8    |      | 99      | 397 | 3.01  | 4   |
| 9      | Acetaminophen          | Analgesic          | 103-90-2    | Y    | 169     | 151 | 0.48  | 3   |
| 10     | Acetanilide            | Analgesic          | 103-84-4    |      | 114     | 135 | 1.24  | 2   |
| 11     | Acetarsonsone          | Antiprotozoal      | 97-44-9     |      | 221     | 275 | -1.30 | 6   |
| 12     | Acetazolamide          | Antiglaucoma       | 59-66-5     | Y    | 259     | 222 | -0.26 | 7   |
| 13     | Acetohexamide          | Antidiabetic       | 968-81-0    | Y    | 187     | 324 | 2.44  | 6   |
| 14     | Acetohydroxamic Acid   | Antiurolithic      | 546-88-3    | Y    | 88      | 75  | -0.23 | 3   |
| 15     | Acetosulfone Sodium    | Antibacterial      | 80-80-8     |      | 285     | 369 | -0.27 | 8   |
| 16     | 21-Acetoxyprogrenolone | Antiinflammatory   | 566-78-9    |      | 181     | 375 | 4.34  | 4   |
| 17     | Acetyryptine           | Antihypotensive    | 3551-18-6   |      | 141     | 202 | 1.04  | 3   |
| 18     | Acetyl Strophanthidin  | Cardiotonic        | 60-38-8     |      | 243     | 447 | 1.30  | 7   |
| 19     | Acetylcysteine         | Expectorant        | 616-91-1    | Y    | 108     | 163 | -0.70 | 4   |
| 20     | Acetyldigitoxin        | Cardiotonic        | 1111-39-3   | Y    | 219     | 807 | 3.37  | 14  |
| 21     | Acetyl-L-Leucine       | Antiemetic         | 1188-21-2   |      | 186     | 173 | -0.27 | 4   |
| 22     | Acexamamic Acid        | Antiinflammatory   | 57-08-9     |      | 105     | 173 | -3.94 | 4   |
| 23     | Acipimox               | Antihyperlipidemic | 51037-30-0  | Y    | 184     | 154 | -1.00 | 5   |
| 24     | Acitazanolast          | Bronchodilator     | 114607-46-4 |      | 242     | 233 | 0.00  | 8   |
| 25     | Acitretin              | Dermatologic       | 55079-83-9  | Y    | 224     | 326 | 6.00  | 3   |
| 26     | Acivicin               | Antineoplastic     | 42228-92-2  |      | 181     | 179 | -0.78 | 5   |
| 27     | Aclarubicin            | Antineoplastic     | 57576-44-0  |      | 152     | 812 | 3.99  | 16  |
| 28     | Aconitine              | Analgesic          | 302-27-2    |      | 197     | 646 | 0.87  | 12  |
| 29     | Acreozast              | Bronchodilator     | 123548-56-1 |      | 194     | 368 | 0.50  | 9   |
| 30     | Acrisorcin             | Antifungal         | 90-45-9     |      | 237     | 194 | 2.74  | 2   |
| 31     | Acrivastine            | Antihistaminic     | 87848-99-5  | Y    | 221     | 348 | 2.41  | 4   |
| 32     | Acronine               | Antineoplastic     | 7008-42-6   |      | 175     | 321 | 3.85  | 4   |
| 33     | Actarit                | Antirheumatic      | 18699-02-0  | Y    | 171     | 193 | 0.35  | 4   |
| 34     | Actinoquinol Sodium    | Dermatologic       | 15301-40-3  |      | 287     | 253 | -0.63 | 5   |
| 35     | Actisomide             | Antiarrhythmic     | 96914-39-5  |      | 202     | 370 | 3.56  | 4   |
| 36     | Acyclovir              | Antiviral          | 59277-89-3  | Y    | 258     | 225 | -1.48 | 8   |
| 37     | Adapalene              | Dermatologic       | 106685-40-9 |      | 321     | 413 | 8.21  | 3   |
| 38     | Adelmidrol             | Oxytocic           | 1675-66-7   |      | 133     | 274 | -0.83 | 6   |
| 39     | Adenine                | Antineoplastic     | 73-24-5     |      | 349     | 135 | -2.13 | 5   |
| 40     | Adenosine              | Antiarrhythmic     | 58-61-7     |      | 234     | 267 | -0.76 | 9   |
| 41     | Adibendan              | Cardiotonic        | 100510-33-6 |      | 287     | 278 | 0.46  | 5   |

| Number | Common Name                             | Indication                    | CAS Number  | Oral | MP (°C) | MW  | ClogP | HBA |
|--------|-----------------------------------------|-------------------------------|-------------|------|---------|-----|-------|-----|
| 42     | Adinazolam                              | Antidepressant                | 37115-32-5  |      | 170     | 352 | 1.27  | 5   |
| 43     | Adiphenine                              | Antispasmodic                 | 64-95-9     |      | 113     | 311 | 3.28  | 3   |
| 44     | Adrafinil                               | Antidepressant                | 63547-13-7  | Y    | 160     | 289 | 0.77  | 4   |
| 45     | Adrenalone                              | Hemostatic                    | 99-45-6     |      | 236     | 181 | -0.62 | 4   |
| 46     | Adrenochrome                            | Hemostatic                    | 1214-74-0   |      | 198     | 235 | -0.83 | 7   |
|        | monoguanylhydrazone<br>methanesulfonate |                               |             |      |         |     |       |     |
| 47     | Afloqualone                             | Muscle Relaxant<br>(Skeletal) | 56287-74-2  |      | 195     | 283 | 0.85  | 4   |
| 48     | Agomelatine                             | Antidepressant                | 138112-76-2 | Y    | 110     | 243 | 2.47  | 3   |
| 49     | Ajmaline                                | Antihypertensive              | 4360-12-7   |      | 155     | 326 | 1.81  | 4   |
| 50     | Aklomide                                | Antibacterial                 | 3011-89-0   |      | 170     | 201 | 0.58  | 5   |
| 51     | Alacepril                               | Antihypertensive              | 74258-86-9  | Y    | 156     | 407 | 0.19  | 7   |
| 52     | Alafosfalin                             | Bone Resorption<br>Inhibitor  | 60668-24-8  |      | 295     | 196 | -1.43 | 6   |
| 53     | Alamifovir                              | Antiviral                     | 193681-12-8 |      | 90      | 575 | 2.34  | 10  |
| 54     | Albaconazole                            | Antifungal                    | 187949-02-6 |      | 102     | 432 | 4.71  | 7   |
| 55     | Albendazole                             | Anthelmintic                  | 54965-21-8  | Y    | 209     | 265 | 3.00  | 5   |
| 56     | Albendazole Oxide                       | Anthelmintic                  | 54029-12-8  |      | 219     | 281 | 0.68  | 6   |
| 57     | Albuterol                               | Bronchodilator                | 18559-94-9  |      | 151     | 239 | 0.69  | 4   |
| 58     | Albutoin                                | Anticonvulsant                | 830-89-7    |      | 211     | 212 | 2.73  | 3   |
| 59     | Alclofenac                              | Analgesic                     | 22131-79-9  |      | 91      | 227 | 2.40  | 3   |
| 60     | Alclometasone<br>Dipropionate           | Antiinflammatory              | 66734-13-2  |      | 214     | 521 | 4.09  | 7   |
| 61     | Alendronic Acid                         | Bone Resorption<br>Inhibitor  | 66376-36-1  | Y    | 236     | 249 | -0.73 | 8   |
| 62     | Alfadolone                              | Anesthetic                    | 14107-37-0  |      | 165     | 348 | 2.67  | 4   |
| 63     | Alfatradiol                             | Estrogen                      | 57-91-0     |      | 178     | 272 | 4.15  | 2   |
| 64     | Alfaxalone                              | Anesthetic                    | 23930-19-0  |      | 167     | 332 | 3.28  | 3   |
| 65     | Alfuzosin                               | Antihypertensive              | 81403-80-7  |      | 179     | 389 | 1.27  | 9   |
| 66     | Algestone Acetonide                     | Antiinflammatory              | 4968-09-6   |      | 210     | 387 | 4.18  | 4   |
| 67     | Algestone Acetophenide                  | Dermatologic                  | 24356-94-3  |      | 151     | 449 | 5.27  | 4   |
| 68     | Alibendol                               | Choleretic                    | 26750-81-2  |      | 96      | 251 | 1.52  | 5   |
| 69     | Alipamide                               | Diuretic                      | 3184-59-6   |      | 126     | 278 | -0.13 | 6   |
| 70     | Alitretinoin                            | Antineoplastic                | 5300-03-8   |      | 191     | 300 | 6.26  | 2   |
| 71     | Alkofanone                              | Antidiarrheal                 | 7527-94-8   |      | 217     | 365 | 2.14  | 4   |
| 72     | Allantoin                               | Dermatologic                  | 97-59-6     |      | 230     | 158 | -1.52 | 7   |
| 73     | Allobarbital                            | Sedative                      | 52-43-7     |      | 172     | 208 | 0.92  | 5   |
| 74     | Allopurinol                             | Antiurolithic                 | 315-30-0    | Y    | 350     | 136 | -0.55 | 5   |
| 75     | Allylestrenol                           | Progestogen                   | 432-60-0    |      | 80      | 300 | 6.78  | 1   |
| 76     | Almestrone                              | Steroid                       | 10448-96-1  |      | 234     | 284 | 4.16  | 2   |
| 77     | Aloracetam                              | Nootropic                     | 119610-26-3 |      | 120     | 208 | 0.42  | 4   |
| 78     | Alosetron                               | Antidiarrheal                 | 122852-42-0 | Y    | 239     | 294 | 1.89  | 5   |

| Number | Common Name            | Indication       | CAS Number  | Oral | MP (°C) | MW  | ClogP | HBA |
|--------|------------------------|------------------|-------------|------|---------|-----|-------|-----|
| 79     | Alovudine              | Antiviral        | 25526-93-6  |      | 178     | 244 | -0.20 | 6   |
| 80     | Alpertine              | Antipsychotic    | 27076-46-6  |      | 143     | 438 | 2.21  | 7   |
| 81     | Alpha Cypermethrin     | Ectoparasiticide | 67375-30-8  |      | 80      | 416 | 6.41  | 4   |
| 82     | Alphaprodine           | Analgesic        | 77-20-3     |      | 220     | 261 | 2.49  | 3   |
| 83     | Alpidem                | Anxiolytic       | 82626-01-5  |      | 140     | 404 | 6.27  | 4   |
| 84     | Alpiropride            | Antimigraine     | 81982-32-3  |      | 169     | 382 | 0.13  | 8   |
| 85     | Alprazolam             | Anxiolytic       | 28981-97-7  | Y    | 227     | 309 | 1.92  | 4   |
| 86     | Alprenolol             | Antihypertensive | 13655-52-2  | Y    | 108     | 249 | 2.91  | 3   |
| 87     | Alprostadil            | Vasodilator      | 745-65-3    |      | 115     | 354 | 2.75  | 5   |
| 88     | Alrestatin             | Antidiabetic     | 51411-04-2  |      | 271     | 255 | 1.24  | 5   |
| 89     | Althiazide             | Diuretic         | 5588-16-9   |      | 207     | 384 | 0.55  | 7   |
| 90     | Altretamine            | Antineoplastic   | 645-05-6    |      | 171     | 210 | 2.53  | 6   |
| 91     | Amanozine              | Diuretic         | 537-17-7    |      | 235     | 187 | 1.16  | 5   |
| 92     | Amantadine             | Antiviral        | 768-94-5    | Y    | 186     | 151 | 2.44  | 1   |
| 93     | Ambazone               | Antibacterial    | 539-21-9    |      | 194     | 237 | -0.38 | 7   |
| 94     | Ambucetamide           | Antispasmodic    | 519-88-0    |      | 130     | 292 | 3.96  | 4   |
| 95     | Ambuphylline           | Bronchodilator   | 124-68-5    |      | 31      | 89  | -0.72 | 2   |
| 96     | Ambuside               | Diuretic         | 3754-19-6   |      | 206     | 394 | 1.56  | 8   |
| 97     | Ambutonium Bromide     | Antispasmodic    | 115-51-5    |      | 229     | 391 |       |     |
| 98     | Amdoxovir              | Antiviral        | 145514-04-1 |      | 238     | 252 | -0.57 | 9   |
| 99     | Amelolide              | Anticonvulsant   | 787-93-9    |      | 211     | 240 | 1.90  |     |
| 100    | Ametantrone Acetate    | Antineoplastic   | 64862-96-0  |      | 157     | 412 | 0.89  | 8   |
| 101    | Amfenac                | Antiinflammatory | 51579-82-9  |      | 122     | 255 | 1.14  | 4   |
| 102    | Amfetaminil            | Nootropic        | 17590-01-1  |      | 85      | 250 | 3.78  | 2   |
| 103    | Amicibone              | Antitussive      | 23271-63-8  |      | 137     | 357 | 3.78  | 4   |
| 104    | Amidephrine Mesylate   | Decongestant     | 37571-84-9  |      | 160     | 244 | 0.11  | 5   |
| 105    | Amifostine             | Antineoplastic   | 20537-88-6  |      | 161     | 214 | -1.23 | 5   |
| 106    | Amikacin               | Antibiotic       | 37517-28-5  |      | 204     | 586 | -5.26 | 18  |
| 107    | Amiloride              | Diuretic         | 2609-46-3   | Y    | 240     | 230 | 0.93  | 8   |
| 108    | Aminobenzoic Acid      | Dermatologic     | 1321-11-5   |      | 186     | 137 | 0.68  |     |
| 109    | Aminocaproic Acid      | Hemostatic       | 1319-82-0   | Y    | 206     | 131 |       |     |
| 110    | Aminoglutethimide      | Antineoplastic   | 125-84-8    | Y    | 149     | 232 | 0.54  | 4   |
| 111    | Aminolevulinic Acid    | Antineoplastic   | 106-60-5    | Y    | 119     | 131 | -1.05 | 4   |
| 112    | Aminopentamide Sulfate | Antispasmodic    | 60-46-8     |      | 176     | 296 | 2.33  | 3   |
| 113    | Aminophenazone         | Analgesic        | 100-88-9    |      | 170     | 179 | 1.03  | 4   |
|        | Cyclamate              |                  |             |      |         |     |       |     |
| 114    | Aminopyrine            | Antiinflammatory | 58-15-1     |      | 122     | 231 | 0.85  | 4   |
| 115    | Aminorex               | Anorexic         | 2207-50-3   |      | 137     | 162 | 0.78  | 3   |
| 116    | Aminosalicylic Acid    | Antibacterial    | 28088-64-4  | Y    | 149     | 153 |       |     |
| 117    | Amiphenazole           | Nootropic        | 490-55-1    |      | 164     | 191 | 1.17  | 3   |
| 118    | Amisometradine         | Diuretic         | 550-28-7    |      | 146     | 195 | 0.67  | 5   |
| 119    | Amisulpride            | Antipsychotic    | 71675-85-9  | Y    | 127     | 369 | 1.50  | 7   |
| 120    | Amithiozone            | Antibacterial    | 104-06-3    |      | 228     | 236 | 1.49  | 5   |

| Number | Common Name            | Indication       | CAS Number  | Oral | MP (°C) | MW  | ClogP | HBA |
|--------|------------------------|------------------|-------------|------|---------|-----|-------|-----|
| 121    | Amitraz                | Ectoparasiticide | 33089-61-1  |      | 87      | 293 | 5.59  | 3   |
| 122    | Amitriptyline          | Antidepressant   | 50-48-6     | Y    | 195     | 277 | 4.41  | 1   |
| 123    | Amitriptylinoxide      | Antidepressant   | 4317-14-0   |      | 229     | 293 | 1.75  | 2   |
| 124    | Amlodipine             | Antianginal      | 88150-42-9  | Y    | 179     | 409 | 3.01  | 7   |
| 125    | Ammonium Valerate      | Sedative         | 109-52-4    |      | 38      | 102 | 1.21  | 2   |
| 126    | Amobarbital            | Sedative         | 57-43-2     |      | 155     | 226 | 2.18  | 5   |
| 127    | Amocarczine            | Anthelmintic     | 36590-19-9  |      | 194     | 371 | 2.32  | 7   |
| 128    | Amodiaquine            | Antimalarial     | 86-42-0     | Y    | 208     | 356 | 3.13  | 4   |
| 129    | Amogastrin             | Antispasmodic    | 16870-37-4  |      | 230     | 711 | 4.16  | 14  |
| 130    | Amolanone              | Anesthetic       | 76-65-3     |      | 44      | 309 | 3.72  | 3   |
| 131    | Amonafide              | Antineoplastic   | 69408-81-7  |      | 170     | 283 | 0.62  | 5   |
| 132    | Amopyroquine           | Antimalarial     | 550-81-2    |      | 197     | 354 | 2.44  | 4   |
| 133    | Amoscanate             | Anthelmintic     | 26328-53-0  |      | 197     | 271 | 4.59  | 5   |
| 134    | Amoxapine              | Antidepressant   | 14028-44-5  | Y    | 178     | 314 | 2.93  | 4   |
| 135    | Amoxydramine Camsilate | Antihypertensive | 3144-16-9   |      | 194     | 232 | -0.94 | 4   |
| 136    | Amphenidone            | Sedative         | 134-37-2    |      | 182     | 186 | -1.11 | 3   |
| 137    | Amphetamine            | Nootropic        | 300-62-9    | Y    | 142     | 135 | 1.79  | 1   |
| 138    | Amphotalide            | Antithrombotic   | 1673-06-9   |      | 114     | 324 | 3.07  | 5   |
| 139    | Ampicillin             | Antibiotic       | 69-53-4     | Y    | 204     | 349 | 1.48  | 7   |
| 140    | Ampiroxicam            | Antiinflammatory | 99464-64-9  |      | 160     | 447 | 1.29  | 10  |
| 141    | Amprolium              | Antibacterial    | 121-25-5    |      | 247     | 279 |       |     |
| 142    | Ampyrimine             | Antineoplastic   | 5587-93-9   |      | 354     | 253 | 1.98  | 7   |
| 143    | Ampyzine Sulfate       | Nootropic        | 5214-29-9   |      | 26      | 123 | 1.33  | 3   |
| 144    | Amrinone               | Cardiotonic      | 60719-84-8  |      | 294     | 187 | -0.21 | 4   |
| 145    | Amsacrine              | Antineoplastic   | 51264-14-3  |      | 235     | 393 | 3.32  | 6   |
| 146    | Amt+C4:C56olmetin      | Analgesic        | 87344-06-7  | Y    | 118     | 420 | 3.58  | 7   |
|        | Guacil                 |                  |             |      |         |     |       |     |
| 147    | Amylocaine             | Anesthetic       | 644-26-8    |      | 116     | 235 | 3.31  |     |
| 148    | Anagestone Acetate     | Progestogen      | 3137-73-3   |      | 173     | 373 | 6.90  | 3   |
| 149    | Anastrozole            | Antineoplastic   | 120511-73-1 | Y    | 82      | 293 | 0.29  | 5   |
| 150    | Androstenediol         | Steroid          | 521-17-5    |      | 177     | 290 | 3.95  | 2   |
| 151    | Androstenedione        | Steroid          | 63-05-8     |      | 158     | 286 | 2.72  | 2   |
| 152    | Anecortave Acetate     | Ophthalmic       | 7753-60-8   |      | 233     | 386 | 3.66  | 5   |
| 153    | Anilamate              | Anticonvulsant   | 5591-49-1   |      | 122     | 270 | 1.50  | 5   |
| 154    | Anileridine            | Analgesic        | 144-14-9    |      | 80      | 352 | 2.96  | 4   |
| 155    | Aniracetam             | Nootropic        | 72432-10-1  | Y    | 122     | 219 | 1.35  | 4   |
| 156    | Anisacril              | Unclassified     | 5129-14-6   |      | 196     | 330 | 4.07  | 3   |
| 157    | Anisindione            | Anticoagulant    | 117-37-3    | Y    | 152     | 252 | 3.27  | 3   |
| 158    | Anisomycin             | Antibiotic       | 22862-76-6  |      | 141     | 265 | 1.68  | 5   |
| 159    | Antazoline             | Antihistaminic   | 91-75-8     |      | 122     | 265 | 3.58  | 3   |
| 160    | Anthralin              | Dermatologic     | 1143-38-0   |      | 174     | 226 | 5.93  | 3   |
| 161    | Anthiolimine           | Diuretic         | 70-49-5     |      | 152     | 150 | -0.15 | 4   |
| 162    | Anthracene             | Antineoplastic   | 120-12-7    |      | 212     | 178 | 4.55  | 0   |

| Number | Common Name                           | Indication         | CAS Number  | Oral | MP (°C) | MW  | ClogP | HBA |
|--------|---------------------------------------|--------------------|-------------|------|---------|-----|-------|-----|
| 163    | Anthramycin                           | Antineoplastic     | 4803-27-4   |      | 191     | 315 | 0.21  | 7   |
| 164    | Antipyrine                            | Antiinflammatory   | 60-80-0     |      | 114     | 188 | 0.44  | 3   |
| 165    | Apovincamine                          | Cardiotonic        | 4880-92-6   |      | 161     | 336 | 3.47  | 4   |
| 166    | Apraclonidine                         | Ophthalmic         | 66711-21-5  |      | 229     | 245 | 1.68  | 4   |
| 167    | Aprepitant                            | Antiemetic         | 170729-80-3 | Y    | 254     | 534 | 4.99  | 7   |
| 168    | Aprindine                             | Antiarrhythmic     | 37640-71-4  | Y    | 121     | 322 | 5.68  | 2   |
| 169    | Aprobarbital                          | Sedative           | 77-02-1     |      | 138     | 210 | 1.28  | 5   |
| 170    | Aprofene                              | Antihypertensive   | 3563-01-7   |      | 162     | 325 | 3.69  | 3   |
| 171    | Aranidipine                           | Antihypertensive   | 86780-90-7  |      | 151     | 388 | 3.24  | 9   |
| 172    | Aranotin                              | Antiviral          | 19885-51-9  |      | 199     | 463 | 3.45  | 9   |
| 173    | Araprofen                             | Antiinflammatory   | 15250-13-2  |      | 188     | 285 | 4.47  | 5   |
| 174    | Arbutin                               | Dermatologic       | 497-76-7    |      | 199     | 272 | -1.35 | 7   |
| 175    | Arformoterol Tartrate                 | Bronchodilator     | 67346-49-0  |      | 74      | 344 | 2.03  | 6   |
| 176    | Argatroban                            | Anticoagulant      | 74863-84-6  |      | 190     | 509 | 0.16  | 11  |
| 177    | Argimesna                             | Antineoplastic     | 74-79-3     |      | 242     | 174 | -1.65 | 6   |
| 178    | Arildone                              | Antiviral          | 56219-57-9  |      | 57      | 369 | 5.69  | 4   |
| 179    | Aripiprazole                          | Antipsychotic      | 129722-12-9 | Y    | 111     | 448 | 3.76  | 5   |
| 180    | Armodafinil                           | Nootropic          | 112111-43-0 | Y    | 156     | 273 | 1.18  | 3   |
| 181    | Aronixil                              | Antihypertensive   | 86627-15-8  |      | 206     | 307 |       | 6   |
| 182    | Arotinolol                            | Antianginal        | 68377-92-4  | Y    | 149     | 372 | 2.18  | 5   |
| 183    | Arprinocid                            | Antibacterial      | 55779-18-5  |      | 246     | 278 | 2.55  | 5   |
| 184    | Arsanilic Acid                        | Antibacterial      | 98-50-0     |      | 232     | 217 | -0.98 | 4   |
| 185    | Arsthinol                             | Antiamoebic        | 119-96-0    |      | 165     | 347 |       | 4   |
| 186    | Artemether                            | Antimalarial       | 71963-77-4  | Y    | 87      | 298 | 2.82  | 5   |
| 187    | Artemisinin                           | Antimalarial       | 63968-64-9  |      | 154     | 282 | 2.27  | 5   |
| 188    | Artemotil                             | Antimalarial       | 75887-54-6  |      | 81      | 312 | 3.33  | 5   |
| 189    | Artesunate                            | Antimalarial       | 88495-63-0  | Y    | 139     | 384 | 3.29  | 8   |
| 190    | Articaine                             | Anesthetic         | 23964-58-1  |      | 176     | 284 | 2.22  | 5   |
| 191    | Asobamast                             | Antihistaminic     | 104777-03-9 |      | 158     | 325 | 1.78  | 8   |
| 192    | Aspirin (Calcium<br>Acetylsalicylate) | Antiinflammatory   | 50-78-2     | Y    | 135     | 180 | 1.40  | 4   |
| 193    | Aspoxicillin                          | Antibiotic         | 63358-49-6  |      | 197     | 494 | -0.20 | 12  |
| 194    | Asulacrine                            | Antineoplastic     | 80841-47-0  |      | 283     | 465 | 2.85  | 8   |
| 195    | Atamestane                            | Antineoplastic     | 96301-34-7  |      | 158     | 298 | 3.04  | 2   |
| 196    | Ataquimast                            | Antihistaminic     | 586348-21-2 |      | 138     | 203 | 1.67  | 4   |
| 197    | Atazanavir                            | Antiviral          | 198904-31-3 | Y    | 199     | 705 | 3.89  | 13  |
| 198    | Atenolol                              | Antihypertensive   | 29122-68-7  | Y    | 152     | 266 | 0.34  | 5   |
| 199    | Atliprofen                            | Antiinflammatory   | 108912-14-7 |      | 186     | 232 | 3.09  | 2   |
| 200    | Atolide                               | Anticonvulsant     | 16231-75-7  |      | 154     | 297 | 2.51  | 4   |
| 201    | Atorvastatin                          | Antihyperlipidemic | 134523-00-5 | Y    | 175     | 559 | 3.85  | 7   |
| 202    | Atovaquone                            | Antimalarial       | 95233-18-4  | Y    | 218     | 367 | 6.47  | 3   |
| 203    | Atropine                              | Mydriatic          | 51-55-8     |      | 116     | 289 | 1.38  | 4   |
| 204    | Atropine Methylbromide                | Antihypotensive    | 80-49-9     | Y    | 192     | 384 |       |     |

| Number | Common Name          | Indication         | CAS Number  | Oral | MP (°C) | MW  | ClogP | HBA |
|--------|----------------------|--------------------|-------------|------|---------|-----|-------|-----|
| 205    | Atropine Oxide       | Antihypertensive   | 4438-22-6   |      | 128     | 305 | 0.44  | 5   |
| 206    | Auranofin            | Antirheumatic      | 34031-32-8  | Y    | 113     | 678 |       |     |
| 207    | Aurothioglycanide    | Antirheumatic      | 16925-51-2  |      | 246     | 364 |       |     |
| 208    | Avitriptan Fumarate  | Antimigraine       | 151140-96-4 |      | 174     | 459 | 0.09  | 9   |
| 209    | Axamozide            | Antipsychotic      | 85076-06-8  |      | 227     | 400 | 4.23  | 6   |
| 210    | Azabon               | Nootropic          | 1150-20-5   |      | 150     | 280 |       | 4   |
| 211    | Azacitidine          | Antineoplastic     | 320-67-2    |      | 231     | 244 | -2.19 | 9   |
| 212    | Azaconazole          | Antifungal         | 60207-31-0  |      | 111     | 300 | 2.09  | 5   |
| 213    | Azacosterol          | Antibacterial      | 313-05-3    |      | 147     | 389 | 5.07  | 3   |
| 214    | Azacyclonol          | Anxiolytic         | 115-46-8    |      | 156     | 267 | 2.74  | 2   |
| 215    | Azalanstat           | Antihyperlipidemic | 143393-27-5 |      | 151     | 430 | 3.87  | 5   |
|        | Dihydrochloride      |                    |             |      |         |     |       |     |
| 216    | Azamethonium Bromide | Antihypertensive   | 306-53-6    |      | 214     | 391 |       |     |
| 217    | Azanator Maleate     | Bronchodilator     | 37855-92-8  |      | 126     | 278 | 1.83  | 3   |
| 218    | Azaperone            | Sedative           | 1649-18-9   |      | 74      | 327 | 3.04  | 4   |
| 219    | Azaribine            | Dermatologic       | 2169-64-4   |      | 101     | 371 |       | 12  |
| 220    | Azaserine            | Antifungal         | 115-02-6    |      | 154     | 173 |       |     |
| 221    | Azatadine            | Antihistaminic     | 3964-81-6   | Y    | 123     | 290 | 2.69  | 2   |
| 222    | Azelaic Acid         | Dermatologic       | 123-99-9    |      | 107     | 188 | 1.20  | 4   |
| 223    | Azimexon             | Immunomodulator    | 64118-86-1  |      | 153     | 194 | -1.55 | 5   |
| 224    | Azintamide           | Choleretic         | 1830-32-6   |      | 96      | 260 | 1.72  | 4   |
| 225    | Azithromycin         | Antibiotic         | 83905-01-5  | Y    | 114     | 749 | 2.58  | 14  |
| 226    | Azosemide            | Diuretic           | 27589-33-9  | Y    | 220     | 371 | 1.40  | 8   |
| 227    | Azumolene Sodium     | Muscle Relaxant    | 64748-79-4  |      | 291     | 349 | 2.40  | 7   |
|        | (Skeletal)           |                    |             |      |         |     |       |     |
| 228    | Baclofen             | Muscle Relaxant    | 1134-47-0   | Y    | 199     | 214 | 0.78  | 3   |
|        | (Skeletal)           |                    |             |      |         |     |       |     |
| 229    | Bamethan             | Vasodilator        | 3703-79-5   |      | 125     | 209 | 1.66  | 3   |
| 230    | Bamifylline          | Bronchodilator     | 2016-63-9   |      | 80      | 385 | 1.08  | 8   |
| 231    | Bamirastine          | Antitussive        | 215529-47-8 |      | 111     | 528 | 5.04  | 8   |
| 232    | Barbital             | Sedative           | 57-44-3     | Y    | 190     | 184 | 0.80  | 5   |
| 233    | Barnidipine          | Antihypertensive   | 104713-75-9 | Y    | 138     | 492 | 5.13  | 9   |
| 234    | Batimastat           | Antineoplastic     | 130370-60-4 |      | 237     | 478 | 3.30  | 7   |
| 235    | Beclamide            | Anticonvulsant     | 501-68-8    |      | 94      | 198 | 4.84  | 2   |
| 236    | Beclomethasone       | Glucocorticoid     | 5534-09-8   |      | 119     | 521 | 4.07  | 7   |
|        | Dipropionate         |                    |             |      |         |     |       |     |
| 237    | Befetupitant         | Antidepressant     | 290296-68-3 |      | 128     | 566 | 3.26  | 5   |
| 238    | Bekanamycin          | Antibiotic         | 4696-76-8   |      | 182     | 484 | -4.02 | 15  |
| 239    | Bemarinone           | Cardiotonic        | 92210-43-0  |      | 209     | 220 | 1.18  | 5   |
| 240    | Bemegride            | Nootropic          | 64-65-3     |      | 125     | 155 | 0.38  | 3   |
| 241    | Bemetizide           | Antidiabetic       | 1824-52-8   |      | 233     | 402 | 1.55  | 7   |
| 242    | Benactyzine          | Antispasmodic      | 302-40-9    |      | 52      | 327 | 2.49  | 4   |
| 243    | Benaxibine           | Antineoplastic     | 27661-27-4  |      | 156     | 269 | -1.05 | 7   |

| Number | Common Name               | Indication           | CAS Number  | Oral | MP (°C) | MW  | ClogP | HBA |
|--------|---------------------------|----------------------|-------------|------|---------|-----|-------|-----|
| 244    | Benazepril                | Antihypertensive     | 86541-75-5  | Y    | 149     | 424 | 4.54  | 7   |
| 245    | Benazeprilat              | Antihypertensive     | 86541-78-8  |      | 271     | 396 | 5.01  | 7   |
| 246    | Bendazol                  | Vasodilator          | 621-72-7    | Y    | 184     | 208 | 3.18  | 2   |
| 247    | Bendroflumethiazide       | Diuretic             | 73-48-3     | Y    | 226     | 420 | 1.29  | 7   |
| 248    | Benethamine Penicillin    | Antibacterial        | 3647-71-0   |      | 180     | 211 | 3.48  | 1   |
| 249    | Benhepazone               | Unclassified         | 363-13-3    |      | 183     | 236 | 1.80  | 3   |
| 250    | Benmoxin                  | Antidepressant       | 7654-03-7   |      | 94      | 240 | 2.48  | 3   |
| 251    | Benorilate                | Analgesic            | 5003-48-5   |      | 175     | 313 | 2.15  | 6   |
| 252    | Benorterone               | Steroid              | 3570-10-3   |      | 148     | 288 | 3.03  | 2   |
| 253    | Benoxaprofen              | Antiinflammatory     | 51234-28-7  |      | 189     | 302 | 3.72  | 4   |
| 254    | Benperidol                | Antipsychotic        | 2062-84-2   |      | 172     | 381 | 3.50  | 5   |
| 255    | Bentazepam                | Sedative             | 29462-18-8  |      | 268     | 296 | 2.63  | 3   |
| 256    | Benzarone                 | Capillary Protectant | 1477-19-6   |      | 124     | 226 | 6.65  | 3   |
| 257    | Benzbromarone             | Uricosuric(          | 3562-84-3   | Y    | 151     | 424 | 6.65  | 3   |
| 258    | Benzestrol                | Estrogen             | 85-95-0     |      | 164     | 298 | 5.93  | 2   |
| 259    | Benzetimide               | Antihypertensive     | 14051-33-3  |      | 158     | 362 | 2.83  | 4   |
| 260    | Benzilonium Bromide       | Antihypertensive     | 1050-48-2   |      | 197     | 434 |       |     |
| 261    | Benziodarone              | Vasodilator          | 68-90-6     |      | 166     | 518 | 4.78  | 3   |
| 262    | Benznidazole              | Antiprotozoal        | 22994-85-0  | Y    | 189     | 260 | 0.91  | 7   |
| 263    | Benzobarbital             | Sedative             | 744-80-9    |      | 135     | 336 | 1.38  | 6   |
| 264    | Benzocaine                | Anesthetic           | 94-09-7     |      | 89      | 165 | 1.84  | 3   |
| 265    | Benzodepa                 | Antineoplastic       | 1980-45-6   |      | 134     | 281 | -1.07 | 6   |
| 266    | Benzoyl Peroxide          | Dermatologic         | 94-36-0     |      | 107     | 242 | 2.86  | 4   |
| 267    | Benzoylpas Calcium        | Antibacterial        | 13898-58-3  |      | 260     | 257 | 2.34  | 5   |
| 268    | Benzpyrinium Bromide      | Cholinergic          | 587-46-2    |      | 115     | 337 |       | 7   |
| 269    | Benzquercin               | Capillary Protectant | 13157-90-9  |      | 124     | 753 | 9.38  | 7   |
| 270    | Benzquinamide             | Antipsychotic        | 63-12-7     |      | 131     | 405 | 0.46  | 7   |
| 271    | Benzthiazide              | Diuretic             | 91-33-8     | Y    | 232     | 432 | 2.58  | 7   |
| 272    | Benzylamine               | Analgesic            | 642-72-8    |      | 160     | 309 | 3.56  | 4   |
| 273    | Benzylhydrochlorothiazide | Diuretic             | 1824-50-6   |      | 257     | 388 | 1.20  | 7   |
| 274    | Benzylpenicillin          | Antibiotic           | 61-33-6     |      | 83      | 334 | 1.92  | 6   |
| 275    | Beperidium Iodide         | Antibiotic           | 86434-57-3  |      | 167     | 527 |       |     |
| 276    | Bephenium                 | Anthelmintic         | 3818-50-6   |      | 169     | 444 |       |     |
|        | Hydroxynaphthoate         |                      |             |      |         |     |       |     |
| 277    | Berberine                 | Antiprotozoal        | 2086-83-1   |      | 195     | 336 |       |     |
| 278    | Bergenin                  | Antiulcerative       | 477-90-7    |      | 234     | 328 | -1.40 | 9   |
| 279    | Bermoprofen               | Antiinflammatory     | 78499-27-1  |      | 129     | 296 | 2.87  | 4   |
| 280    | Bervastatin               | Antihyperlipidemic   | 132017-01-7 |      | 113     | 467 | 3.99  | 5   |
| 281    | Betaine                   | Antidote             | 107-43-7    | Y    | 248     | 117 |       |     |
| 282    | Betamethadol              | Glucocorticoid       | 17199-55-2  |      | 107     | 311 | 3.95  | 2   |
| 283    | Betamethasone             | Glucocorticoid       | 378-44-9    |      | 238     | 392 | 2.03  | 5   |
| 284    | Betamethasone Acetate     | Glucocorticoid       | 987-24-6    |      | 213     | 435 | 2.65  | 6   |
| 285    | Betamethasone Benzoate    | Glucocorticoid       | 22298-29-9  |      | 228     | 497 | 3.95  | 6   |



| Number | Common Name                       | Indication         | CAS Number  | Oral | MP (°C) | MW  | ClogP | HBA |
|--------|-----------------------------------|--------------------|-------------|------|---------|-----|-------|-----|
| 286    | Betamethasone<br>Dipropionate     | Glucocorticoid     | 5593-20-4   |      | 177     | 505 | 3.67  | 7   |
| 287    | Betamethasone Valerate            | Glucocorticoid     | 2152-44-5   |      | 184     | 477 | 4.14  | 6   |
| 288    | Betaxolol                         | Antianginal        | 63659-18-7  | Y    | 71      | 307 | 2.69  | 4   |
| 289    | Bethanidine                       | Antihypertensive   | 55-73-2     | Y    | 196     | 177 | 1.73  |     |
| 290    | Bevantolol                        | Antianginal        | 59170-23-9  |      | 138     | 345 | 3.00  | 5   |
| 291    | Bevonium Metilsulfate             | Antihypertensive   | 5205-82-3   |      | 135     | 466 |       |     |
| 292    | Bezafibrate                       | Antihyperlipidemic | 41859-67-0  | Y    | 186     | 362 | 2.50  | 5   |
| 293    | Bezitramide                       | Analgesic          | 15301-48-1  |      | 147     | 493 | 4.16  | 6   |
| 294    | Bibenzonium Bromide               | Antitussive        | 15585-70-3  | Y    | 146     | 364 |       |     |
| 295    | Bicalutamide                      | Antineoplastic     | 90357-06-5  | Y    | 193     | 430 | 4.14  | 6   |
| 296    | Bicifadine                        | Analgesic          | 71195-57-8  | Y    | 208     | 173 | 2.15  | 1   |
| 297    | Bidisomide                        | Antiarrhythmic     | 116078-65-0 |      | 141     | 408 | 3.36  | 5   |
| 298    | Bifonazole                        | Antifungal         | 60628-96-8  |      | 141     | 310 | 4.69  | 2   |
| 299    | Bimakalim                         | Antihypertensive   | 117545-11-6 |      | 148     | 278 | 3.53  | 4   |
| 300    | Binedaline                        | Antidepressant     | 60662-16-0  |      | 53      | 293 | 4.34  | 3   |
| 301    | Binfloxacin                       | Antibacterial      | 108437-28-1 |      | 224     | 359 | 2.46  | 6   |
| 302    | Binospirone Mesylate              | Anxiolytic         | 102908-59-8 |      | 177     | 358 | 3.44  | 6   |
| 303    | Bioresmethrin                     | Dermatologic       | 28434-01-7  |      | 33      | 338 | 6.35  | 3   |
| 304    | Bipenamol                         | Antidepressant     | 79467-22-4  |      | 97      | 245 | 2.33  | 2   |
| 305    | Biperiden                         | Antiparkinsonian   | 514-65-8    | Y    | 108     | 311 | 4.27  | 2   |
| 306    | Bisacodyl                         | Laxative           | 603-50-9    | Y    | 133     | 361 | 3.45  | 5   |
| 307    | Bismuth Sodium<br>Triglycollamate | Immunomodulator    | 139-13-9    |      | 242     | 191 | 0.03  | 7   |
| 308    | Bithionolate Sodium               | Antibacterial      | 97-18-7     |      | 188     | 356 | 5.05  | 2   |
| 309    | Bitoscanate                       | Anthelmintic       | 4044-65-9   |      | 129     | 192 | 4.22  | 2   |
| 310    | Bolasterone                       | Steroid            | 1605-89-6   |      | 164     | 316 | 4.10  | 2   |
| 311    | Bolazine                          | Antiinflammatory   | 4267-81-6   |      | 239     | 605 | 10.20 | 4   |
| 312    | Bolmantalate                      | Steroid            | 1491-81-2   |      | 205     | 437 | 6.78  | 3   |
| 313    | Bosutinib                         | Antineoplastic     | 380843-75-4 | Y    | 118     | 530 | 3.13  | 8   |
| 314    | Boxidine                          | Antihyperlipidemic | 10355-14-3  |      | 109     | 335 | 4.04  | 2   |
| 315    | Brallobarbital                    | Sedative           | 561-86-4    |      | 169     | 287 | 1.06  | 5   |
| 316    | Brequinar Sodium                  | Antineoplastic     | 96187-53-0  |      | 336     | 375 | 6.85  | 3   |
| 317    | Brimonidine                       | Antiglaucoma       | 59803-98-4  |      | 255     | 292 | 1.20  | 5   |
| 318    | Brivudine                         | Antiviral          | 69304-47-8  |      | 145     | 333 | 0.29  | 7   |
| 319    | Brocrinat                         | Diuretic           | 72481-99-3  |      | 181     | 366 | 3.18  | 5   |
| 320    | Brodinoprim                       | Antineoplastic     | 56518-41-3  |      | 233     | 339 | 2.29  | 6   |
| 321    | Brofezil                          | Nootropic          | 17969-45-8  |      | 110     | 312 | 2.90  | 3   |
| 322    | Brofoxine                         | Antipsychotic      | 21440-97-1  |      | 204     | 256 | 2.38  | 3   |
| 323    | Bromamid                          | Unclassified       | 332-69-4    |      | 115     | 271 | 0.90  | 3   |
| 324    | Bromazepam                        | Anxiolytic         | 1812-30-2   | Y    | 245     | 316 | 2.28  | 4   |
| 325    | Bromebric Acid                    | Antineoplastic     | 5711-40-0   |      | 147     | 285 | 2.97  | 4   |
| 326    | Bromhexine                        | Expectorant        | 3572-43-8   | Y    | 238     | 376 | 4.80  | 2   |

| Number | Common Name       | Indication       | CAS Number | Oral | MP (°C) | MW  | ClogP | HBA |
|--------|-------------------|------------------|------------|------|---------|-----|-------|-----|
| 327    | Bromindione       | Anticoagulant    | 1146-98-1  |      | 141     | 301 | 4.17  | 2   |
| 328    | Bromisovalum      | Sedative         | 496-67-3   |      | 149     | 223 | 1.06  | 4   |
| 329    | Bromocriptine     | Pituitary        | 25614-03-3 | Y    | 217     | 655 | 8.60  | 10  |
| 330    | Bromofos          | Antineoplastic   | 2104-96-3  |      | 53      | 366 | 5.17  | 3   |
| 331    | Bromopride        | Antiemetic       | 4093-35-0  |      | 149     | 344 | 2.54  | 5   |
| 332    | Bromperidol       | Antipsychotic    | 10457-90-6 |      | 157     | 420 | 4.03  | 3   |
| 333    | Broparestrol      | Estrogen         | 479-68-5   |      | 113     | 363 | 5.95  | 0   |
| 334    | Bropirimine       | Antineoplastic   | 56741-95-8 |      | 247     | 266 | 1.95  | 4   |
| 335    | Brotizolam        | Sedative         | 57801-81-7 | Y    | 213     | 394 | 2.46  | 4   |
| 336    | Brovincamine      | Vasodilator      | 57475-17-9 | Y    | 214     | 433 | 3.63  | 5   |
| 337    | Broxaterol        | Bronchodilator   | 76596-57-1 |      | 85      | 263 | 1.60  | 4   |
| 338    | Broxuridine       | Antineoplastic   | 59-14-3    |      | 183     | 307 | -0.21 | 7   |
| 339    | Brucine           | Nootropic        | 357-57-3   |      | 178     | 394 | 1.41  | 6   |
| 340    | Bucetin           | Analgesic        | 1083-57-4  |      | 160     | 223 | 1.35  | 4   |
| 341    | Bucillamine       | Antirheumatic    | 65002-17-7 | Y    | 137     | 223 | 1.03  | 4   |
| 342    | Buclosamide       | Antifungal       | 575-74-6   |      | 91      | 228 | 3.17  | 3   |
| 343    | Bucloxic Acid     | Antiinflammatory | 32808-51-8 |      | 159     | 295 | 4.34  | 3   |
| 344    | Bucolome          | Antiinflammatory | 841-73-6   |      | 84      | 266 | 3.61  | 5   |
| 345    | Bucricaine        | Analgesic        | 316-15-4   |      | 63      | 254 | 4.53  | 2   |
| 346    | Budesonide        | Glucocorticoid   | 51333-22-3 | Y    | 257     | 431 | 3.20  | 6   |
| 347    | Budralazine       | Antihypertensive | 36798-79-5 |      | 133     | 240 | 2.33  | 4   |
| 348    | Bufenadrine       | Antihistaminic   | 604-74-0   |      | 70      | 311 | 4.58  | 2   |
| 349    | Bufeniode         | Antihypertensive | 22103-14-6 |      | 212     | 551 | 5.11  | 3   |
| 350    | Bufexamac         | Antiinflammatory | 2438-72-4  |      | 154     | 223 | 2.57  | 4   |
| 351    | Bufogenin         | Cardiotonic      | 465-39-4   |      | 162     | 385 | 2.27  | 4   |
| 352    | Buformin          | Antidiabetic     | 692-13-7   |      | 175     | 157 | -1.20 | 5   |
| 353    | Bumadizone        | Analgesic        | 3583-64-0  |      | 116     | 326 | 3.88  | 5   |
| 354    | Bumetanide        | Diuretic         | 28395-03-1 | Y    | 231     | 364 | 2.88  | 7   |
| 355    | Bumetizole        | Dermatologic     | 3896-11-5  |      | 139     | 316 | 6.81  | 4   |
| 356    | Bunamidine        | Anthelmintic     | 3748-77-4  |      | 214     | 383 | 8.23  | 3   |
| 357    | Bunamiodyl Sodium | Unclassified     | 1233-53-0  |      | 113     | 639 | 3.62  | 4   |
| 358    | Bunaprolast       | Bronchodilator   | 99107-52-5 |      | 49      | 272 | 4.72  | 3   |
| 359    | Bunitrolol        | Antianginal      | 34915-68-9 |      | 164     | 248 | 1.73  | 4   |
| 360    | Bupicomide        | Antihypertensive | 22632-06-0 |      | 128     | 178 | 1.81  | 3   |
| 361    | Bupivacaine       | Anesthetic       | 38396-39-3 |      | 109     | 288 | 3.31  | 3   |
| 362    | Bupranolol        | Antianginal      | 14556-46-8 |      | 221     | 272 | 2.97  | 3   |
| 363    | Bupropion         | Antidepressant   | 34911-55-2 | Y    | 25      | 240 | 2.32  | 2   |
| 364    | Buquinolate       | Antibacterial    | 5486-03-3  |      | 290     | 361 | 4.84  |     |
| 365    | Buramate          | Anticonvulsant   | 4663-83-6  |      | 41      | 195 | 0.48  | 4   |
| 366    | Buspirone         | Anxiolytic       | 36505-84-7 | Y    | 107     | 386 | 1.59  | 7   |
| 367    | Busulfan          | Antineoplastic   | 55-98-1    | Y    | 116     | 246 | -0.56 | 6   |
| 368    | Butabarbital      | Sedative         | 125-40-6   | Y    | 167     | 212 | 1.67  | 5   |
| 369    | Butacetin         | Analgesic        | 2109-73-1  |      | 131     | 207 | 2.42  | 3   |

| Number | Common Name                 | Indication                  | CAS Number  | Oral | MP (°C) | MW  | ClogP | HBA |
|--------|-----------------------------|-----------------------------|-------------|------|---------|-----|-------|-----|
| 370    | Butadiazamide               | Analgesic                   | 7007-88-7   |      | 130     | 332 | 3.77  | 5   |
| 371    | Butafosfan                  | Antineoplastic              | 17316-67-5  |      | 219     | 179 | -0.24 | 3   |
| 372    | Butalamine                  | Vasodilator                 | 22131-35-7  |      | 141     | 316 | 5.66  | 5   |
| 373    | Butalbital                  | Sedative                    | 77-26-9     |      | 138     | 224 | 1.79  | 5   |
| 374    | Butallylonal                | Sedative                    | 1142-70-7   |      | 132     | 303 | 1.96  | 5   |
| 375    | Butamben                    | Anesthetic                  | 94-25-7     |      | 58      | 193 | 2.85  | 3   |
| 376    | Butamin                     | Unclassified                | 891-33-8    |      | 148     | 250 | 2.27  | 4   |
| 377    | Butanilcaine                | Anesthetic                  | 3785-21-5   |      | 46      | 255 | 2.29  | 3   |
| 378    | Butanixin                   | Antiinflammatory            | 55285-35-3  |      | 176     | 270 | 5.84  | 4   |
| 379    | Butedronic Acid             | Bone Resorption<br>Inhibito | 51395-42-7  |      | 150     | 292 | -1.55 | 10  |
| 380    | Butenafine                  | Antifungal                  | 101828-21-1 |      | 201     | 317 | 6.00  | 1   |
| 381    | Butethal                    | Sedative                    | 77-28-1     |      | 127     | 212 | 1.82  | 5   |
| 382    | Buthalital Sodium           | Anesthetic                  | 468-65-5    |      | 146     | 240 | 2.30  | 4   |
| 383    | Buthiazide                  | Diuretic                    | 2043-38-1   |      | 228     | 354 | 1.65  | 7   |
| 384    | Butibufen                   | Antiinflammatory            | 55837-18-8  |      | 52      | 220 | 4.01  | 2   |
| 385    | Butixirate                  | Analgesic                   | 5769-10-8   |      | 55      | 175 | 3.02  | 1   |
| 386    | Butobendine                 | Antiarrhythmic              | 55769-65-8  |      | 63      | 621 | 6.48  | 12  |
| 387    | Butoconazole                | Antifungal                  | 64872-76-0  |      | 69      | 412 | 6.88  | 2   |
| 388    | Butofilolol                 | Antihypertensive            | 58930-32-8  |      | 89      | 311 | 3.31  | 4   |
| 389    | Butorphanol                 | Analgesic                   | 42408-82-2  |      | 216     | 327 | 3.54  | 3   |
| 390    | Butopium Bromide            | Antispasmodic               | 29025-14-7  |      | 163     | 533 |       |     |
| 391    | Butylphenamide              | Antiglaucoma                | 131-90-8    |      | 71      | 269 | 4.56  | 3   |
| 392    | Butylscopolamine<br>Bromide | Antispasmodic               | 149-64-4    | Y    | 144     | 440 |       |     |
| 393    | Buzepide Metiodide          | Antispasmodic               | 15351-05-0  |      | 213     | 478 |       |     |
| 394    | Cabergoline                 | Antiparkinsonian            | 81409-90-7  | Y    | 103     | 452 | 2.55  | 7   |
| 395    | Cadralazine                 | Vasodilator                 | 64241-34-5  | Y    | 161     | 283 | 0.54  | 8   |
| 396    | Cafaminol                   | Decongestant                | 30924-31-3  |      | 163     | 267 | 0.04  | 8   |
| 397    | Caffeine                    | Nootropic                   | 58-08-2     | Y    | 235     | 194 | -0.63 | 6   |
| 398    | Calcipotriene               | Dermatologic                | 112965-21-6 |      | 167     | 413 | 5.02  | 3   |
| 399    | Calcium Carbimide           | Alcohol Deterrant           | 420-04-2    |      | 45      | 42  | -0.82 | 2   |
| 400    | Calusterone                 | Antineoplastic              | 17021-26-0  |      | 128     | 316 | 4.10  | 2   |
| 401    | Camazepam                   | Anxiolytic                  | 36104-80-0  |      | 174     | 372 | 3.11  | 6   |
| 402    | Cambendazole                | Anthelmithic                | 26097-80-3  |      | 213     | 302 | 2.79  | 6   |
| 403    | Camphor                     | Analgesic                   | 76-22-2     |      | 177     | 152 | 2.09  | 1   |
| 404    | Camphoric Acid              | Analgesic                   | 5394-83-2   |      | 203     | 200 | 1.34  | 4   |
| 405    | Camphotamide                | Nootropic                   | 4876-45-3   |      | 175     | 425 |       |     |
| 406    | Camptothecin                | Antineoplastic              | 7689-03-4   |      | 262     | 348 | 0.95  | 6   |
| 407    | Candesartan                 | Antihypertensive            | 139481-59-7 | Y    | 184     | 440 | 4.65  | 9   |
| 408    | Candesartan Cilexetil       | Antihypertensive            | 145040-37-5 | Y    | 163     | 611 | 7.21  | 12  |
| 409    | Cannabinol                  | Antiemetic                  | 521-35-7    |      | 76      | 310 | 6.93  | 2   |
| 410    | Canrenoate                  | Diuretic                    | 4138-96-9   |      | 189     | 358 | 2.96  | 4   |

| Number | Common Name              | Indication                    | CAS Number  | Oral | MP (°C) | MW  | ClogP | HBA |
|--------|--------------------------|-------------------------------|-------------|------|---------|-----|-------|-----|
| 411    | Canrenone                | Diuretic                      | 976-71-6    |      | 156     | 340 | 3.51  | 3   |
| 412    | Cantharides              | Dermatologic                  | 56-25-7     |      | 216     | 196 | -0.41 | 4   |
| 413    | Capecitabine             | Antineoplastic                | 154361-50-9 | Y    | 89      | 359 | 1.04  | 9   |
| 414    | Capobenic Acid           | Antiarrhythmic                | 21434-91-3  |      | 122     | 325 | 0.98  | 7   |
| 415    | Capsaicin                | Analgesic                     | 404-86-4    |      | 70      | 305 | 3.22  | 4   |
| 416    | Captopril                | Antihypertensive              | 62571-86-2  | Y    | 104     | 217 | 0.27  | 4   |
| 417    | Capuride                 | Sedative                      | 5579-13-5   |      | 172     | 186 | 1.84  | 4   |
| 418    | Carbachol                | Cholinergic                   | 51-83-2     |      | 206     | 183 |       |     |
| 419    | Carbadox                 | Antibacterial                 | 6804-07-5   |      | 240     | 262 | -1.41 | 8   |
| 420    | Carbamazepine            | Anticonvulsant                | 298-46-4    | Y    | 190     | 236 | 1.90  | 3   |
| 421    | Carbantel Lauryl Sulfate | Anthelmintic                  | 22790-84-7  |      | 83      | 254 | 3.00  | 4   |
| 422    | Carbantel Lauryl Sulfate | Anthelmintic                  | 151-41-7    |      | 27      | 266 | 5.01  | 4   |
| 423    | Carbaril                 | Ectoparasiticide              | 63-25-2     |      | 139     | 201 | 2.34  | 3   |
| 424    | Carbarsone               | Antiamoebic                   | 121-59-5    |      | 171     | 260 | -1.28 | 6   |
| 425    | Carbazochrome            | Hemostatic                    | 69-81-8     | Y    | 210     | 236 | -0.78 | 7   |
| 426    | Carbenoxolone            | Antiulcerative                | 5697-56-3   | Y    | 293     | 571 | 6.63  | 7   |
| 427    | Carbenzide               | Antipsychotic                 | 3240-20-8   |      | 68      | 208 | 2.15  | 4   |
| 428    | Carbidopa                | Antiparkinsonian              | 28860-95-9  | Y    | 206     | 226 | -1.75 | 6   |
| 429    | Carbimazole              | Thyroid                       | 22232-54-8  | Y    | 122     | 186 | 0.16  | 4   |
| 430    | Carbocloral              | Sedative                      | 541-79-7    |      | 104     | 236 | 1.62  | 4   |
| 431    | Carbocysteine            | Mucolytic                     | 638-23-3    | Y    | 200     | 179 | 0.20  | 5   |
| 432    | Carbomycin               | Antibiotic                    | 4564-87-8   |      | 214     | 842 | 2.68  | 17  |
| 433    | Carboprost Methyl        | Oxytocic                      | 35700-21-1  |      | 56      | 383 | 3.64  | 5   |
| 434    | Carboquone               | Antineoplastic                | 24279-91-2  |      | 202     | 321 | 0.88  | 8   |
| 435    | Carbromal                | Sedative                      | 77-65-6     |      | 118     | 237 | 1.62  | 4   |
| 436    | Carbubarb                | Sedative                      | 960-05-4    |      | 193     | 271 | 0.21  | 8   |
| 437    | Carbutamide              | Antidiabetic                  | 339-43-5    |      | 140     | 271 | 1.01  | 6   |
| 438    | Carbuterol               | Bronchodilator                | 34866-47-2  |      | 175     | 267 | 0.79  | 6   |
| 439    | Carebastine              | Antihistaminic                | 90729-42-3  |      | 174     | 500 | 4.93  | 5   |
| 440    | Carfimate                | Sedative                      | 3567-38-2   |      | 88      | 175 | 1.44  | 3   |
| 441    | Carisoprodol             | Muscle Relaxant<br>(Skeletal) | 78-44-4     | Y    | 91      | 260 | 2.10  | 6   |
| 442    | Carmofur                 | Antineoplastic                | 61422-45-5  |      | 111     | 257 | 2.54  | 6   |
| 443    | Carmoxirole              | Antihypertensive              | 98323-83-2  |      | 285     | 374 | 4.57  | 4   |
| 444    | Carmustine               | Antineoplastic                | 154-93-8    |      | 32      | 214 | 1.38  | 5   |
| 445    | Carnidazole              | Antiprotozoal                 | 42116-76-7  |      | 145     | 244 | 1.05  | 7   |
| 446    | Carnitine                | Antihyperlipidemic            | 541-15-1    |      | 196     | 161 |       |     |
| 447    | Carocainide              | Antiarrhythmic                | 66203-00-7  |      | 116     | 363 | 0.75  | 8   |
| 448    | Caroverine               | Antispasmodic                 | 23465-76-1  |      | 69      | 365 | 3.61  | 5   |
| 449    | Caroxazone               | Antidepressant                | 18464-39-6  |      | 204     | 206 | 1.12  | 5   |
| 450    | Carprazidil              | Antihypertensive              | 68020-77-9  |      | 214     | 291 | -0.14 | 9   |
| 451    | Carprofen                | Antiinflammatory              | 53716-49-7  | Y    | 198     | 274 | 3.84  | 3   |
| 452    | Carpronium Chloride      | Cholinergic                   | 13254-33-6  |      | 136     | 196 |       |     |

| Number | Common Name          | Indication          | CAS Number  | Oral | MP (°C) | MW  | ClogP | HBA |
|--------|----------------------|---------------------|-------------|------|---------|-----|-------|-----|
| 453    | Carsalam             | Analgesic           | 2037-95-8   |      | 221     | 163 | 0.98  | 4   |
| 454    | Carvedilol           | Antihypertensive    | 72956-09-3  | Y    | 114     | 406 | 4.07  | 6   |
| 455    | Carzenide            | Unclassified        | 138-41-0    |      | 281     | 201 | 0.50  | 5   |
| 456    | Cathine              | Anorexic            | 492-39-7    |      | 77      | 151 | 0.36  | 2   |
| 457    | Cefalonium           | Antibiotic          | 5575-21-3   |      | 149     | 459 |       |     |
| 458    | Cefaloram            | Antibiotic          | 859-07-4    |      | 158     | 390 | 0.36  | 8   |
| 459    | Cefamandole Nafate   | Antibiotic          | 57268-80-1  |      | 190     | 491 | -0.05 | 12  |
| 460    | Cefazolin            | Antibiotic          | 25953-19-9  |      | 195     | 455 | -0.70 | 12  |
| 461    | Cefbuperazone        | Antibiotic          | 76610-84-9  |      | 119     | 628 | -1.55 | 18  |
| 462    | Cefdinir             | Antibiotic          | 91832-40-5  | Y    | 180     | 395 | -1.78 | 10  |
| 463    | Cefditoren Pivoxil   | Antibiotic          | 117467-28-4 | Y    | 128     | 621 | 3.35  | 13  |
| 464    | Cefepime             | Antibiotic          | 88040-23-7  |      | 150     | 481 |       |     |
| 465    | Cefoperazone         | Antibiotic          | 62893-19-0  |      | 169     | 646 | -1.11 | 17  |
| 466    | Cefoxitin            | Antibiotic          | 35607-66-0  |      | 150     | 427 | 0.00  | 10  |
| 467    | Cefpiramide          | Antibiotic          | 70797-11-4  |      | 214     | 613 | 0.17  | 15  |
| 468    | Cefpodoxime Proxetil | Antibiotic          | 87239-81-4  | Y    | 101     | 558 | 2.95  | 14  |
| 469    | Cefroxadine          | Antibiotic          | 51762-05-1  |      | 170     | 365 | 1.46  | 8   |
| 470    | Ceftazole            | Antibiotic          | 26973-24-0  |      | 155     | 440 | -0.76 | 12  |
| 471    | Ceftizoxime          | Antibiotic          | 68401-81-0  |      | 227     | 383 | -0.65 | 10  |
| 472    | Cefuroxime           | Antibiotic          | 55268-75-2  | Y    | 172     | 424 | 0.26  | 12  |
| 473    | Cefuroxime Axetil    | Antibiotic          | 64544-07-6  | Y    | 136     | 510 | 1.93  | 14  |
| 474    | Celecoxib            | Antiinflammatory    | 169590-42-5 | Y    | 161     | 381 | 2.59  | 5   |
| 475    | Celgosivir           | Antiviral           | 121104-96-9 | Y    | 115     | 259 | 0.34  | 6   |
| 476    | Celiprolol           | Antihypertensive    | 56980-93-9  | Y    | 114     | 379 | 1.92  | 7   |
| 477    | Cephalexin           | Antibiotic          | 15686-71-2  | Y    | 164     | 374 | 0.35  | 7   |
| 478    | Cephaloglycin        | Antibiotic          | 3577-01-3   |      | 237     | 405 | -0.39 | 9   |
| 479    | Cephalothin          | Antibiotic          | 153-61-7    |      | 158     | 396 | 0.09  | 8   |
| 480    | Cepharanthine        | Antibiotic          | 481-49-2    |      | 103     | 607 | 6.29  | 8   |
| 481    | Cephradine           | Antibiotic          | 38821-53-3  | Y    | 141     | 349 | 0.48  | 7   |
| 482    | Cericlamine          | Antidepressant      | 112922-55-1 |      | 192     | 262 | 3.09  | 2   |
| 483    | Ceronapril           | Antihypertensive    | 111223-26-8 |      | 193     | 440 | 1.79  | 8   |
| 484    | Cetalkonium Chloride | Antibacterial       | 122-18-9    |      | 64      | 396 |       |     |
| 485    | Cetamolol            | Antihypertensive    | 34919-98-7  |      | 97      | 310 | 1.36  | 6   |
| 486    | Cethromycin          | Antibacterial       | 205110-48-1 | Y    | 212     | 766 | 4.19  | 13  |
| 487    | Cetirizine           | Antihistaminic      | 83881-51-0  | Y    | 113     | 389 | 1.62  | 5   |
| 488    | Cetohexazine         | Unclassified        | 7007-92-3   |      | 127     | 124 | 0.52  | 3   |
| 489    | Cetophenicol         | Antibacterial       | 735-52-4    |      | 129     | 320 | 0.57  | 5   |
| 490    | Cetoxime             | Antihistaminic      | 25394-78-9  |      | 108     | 255 | 2.62  | 4   |
| 491    | Chaulmoogric Acid    | Antibacterial       | 29106-32-9  |      | 68      | 280 | 6.99  |     |
| 492    | Chenodiol            | Anticholelithogenic | 474-25-9    | Y    | 137     | 393 | 4.76  | 4   |
| 493    | Chiniofon            | Antiamebic          | 547-91-1    |      | 266     | 351 | -0.24 | 5   |
| 494    | Chlophedianol        | Antitussive         | 791-35-5    |      | 120     | 290 | 3.38  | 2   |
| 495    | Chloracyzine         | Vasodilator         | 800-22-6    |      | 164     | 361 | 5.04  | 3   |

| Number | Common Name                           | Indication       | CAS Number | Oral | MP (°C) | MW  | ClogP | HBA |
|--------|---------------------------------------|------------------|------------|------|---------|-----|-------|-----|
| 496    | Chloral Hydrate (Chloral<br>Betaine)  | Sedative         | 302-17-0   |      | 58      | 165 |       | 2   |
| 497    | Chloralformamide                      | Sedative         | 515-82-2   |      | 120     | 192 | -0.08 | 3   |
| 498    | Chloralose                            | Sedative         | 15879-93-3 |      | 187     | 310 | 1.13  | 6   |
| 499    | Chlorambucil                          | Antineoplastic   | 305-03-3   | Y    | 64      | 304 | 2.61  | 3   |
| 500    | Chloramphenicol                       | Antibiotic       | 56-75-7    |      | 151     | 323 | 1.10  | 7   |
| 501    | Chloramphenicol<br>Palmitate          | Antibiotic       | 530-43-8   |      | 88      | 562 | 8.69  | 8   |
| 502    | Chloramphenicol<br>Succinate          | Antibiotic       | 3544-94-3  |      | 128     | 423 | 1.72  | 10  |
| 503    | Chloranil                             | Antifungal       | 118-75-2   |      | 288     | 246 | 3.21  | 2   |
| 504    | Chlorazanil                           | Antifungal       | 500-42-5   |      | 234     | 222 | 1.96  | 5   |
| 505    | Chlorbetamide                         | Antiamoebic      | 97-27-8    |      | 113     | 331 | 1.45  | 3   |
| 506    | Chlorcyclizine                        | Antihistaminic   | 82-93-9    |      | 234     | 301 | 3.24  | 2   |
| 507    | Chlordiazepoxide                      | Anxiolytic       | 58-25-3    | Y    | 237     | 300 | 2.49  | 4   |
| 508    | Chlordimorine                         | Unclassified     | 494-14-4   |      | 57      | 332 | 3.42  | 3   |
| 509    | Chlorhexadol                          | Sedative         | 3563-58-4  |      | 103     | 266 | 2.41  | 3   |
| 510    | Chlorindanol                          | Contraceptive    | 145-94-8   |      | 92      | 169 | 3.28  | 1   |
| 511    | Chlorisondamine                       | Antihypertensive | 69-27-2    |      | 261     | 429 |       |     |
| 512    | Chlormadinone Acetate                 | Progestogen      | 302-22-7   | Y    | 209     | 405 | 3.80  | 4   |
| 513    | Chlormezanone                         | Anxiolytic       | 80-77-3    |      | 117     | 274 | 0.48  | 4   |
| 514    | Chlornaphazine                        | Antineoplastic   | 494-03-1   |      | 54      | 268 | 4.06  | 1   |
| 515    | Chlorobutanol                         | Analgesic        | 57-15-8    |      | 96      | 177 | 1.73  | 1   |
| 516    | Chloroguanide                         | Antimalarial     | 500-92-5   |      | 129     | 254 | 2.49  | 5   |
| 517    | Chlorophenothane                      | Ectoparasiticide | 50-29-3    |      | 108     | 354 | 6.32  | 0   |
| 518    | Chlorprednisone Acetate               | Glucocorticoid   | 14066-79-6 |      | 218     | 435 | 2.31  | 6   |
| 519    | Chloroquine                           | Antimalarial     | 54-05-7    | Y    | 88      | 320 | 4.41  | 3   |
| 520    | Chloroserpidine                       | Antihypertensive | 7008-24-4  |      | 165     | 613 | 5.69  | 10  |
| 521    | <b>Chlorothiazide</b>                 | Diuretic         | 58-94-6    | Y    | 343     | 296 | -0.15 | 7   |
| 522    | Chlorotrianisene                      | Estrogen         | 569-57-3   |      | 115     | 381 | 5.52  | 3   |
| 523    | Chloroxine                            | Dermatologic     | 773-76-2   |      | 176     | 214 | 3.07  | 2   |
| 524    | Chlorphenesin Carbamate<br>(Skeletal) | Muscle Relaxant  | 886-74-8   | Y    | 89      | 246 | 1.66  | 5   |
| 525    | Chlorproguanil                        | Antimalarial     | 537-21-3   |      | 121     | 288 | 3.27  | 5   |
| 526    | Chlorpromazine                        | Antiemetic       | 50-53-3    | Y    | 53      | 319 | 5.18  | 2   |
| 527    | Chlorpropamide                        | Antidiabetic     | 94-20-2    | Y    | 120     | 277 | 2.30  | 5   |
| 528    | Chlorprothixene                       | Antipsychotic    | 113-59-7   |      | 98      | 316 | 5.21  | 1   |
| 529    | Chlorpyrifos                          | Ectoparasiticide | 2921-88-2  |      | 42      | 351 | 5.00  | 4   |
| 530    | Chlorquinaldol                        | Antibacterial    | 72-80-0    |      | 112     | 228 | 3.51  | 2   |
| 531    | Chlortetracycline                     | Antibiotic       | 57-62-5    |      | 169     | 479 | 1.32  | 10  |
| 532    | Chlorthalidone                        | Diuretic         | 77-36-1    |      | 42      | 339 | 0.70  | 6   |
| 533    | Chlorthenoxazine                      | Analgesic        | 132-89-8   |      | 147     | 212 | 2.47  | 3   |

| Number | Common Name         | Indication                    | CAS Number  | Oral | MP (°C) | MW  | ClogP | HBA |
|--------|---------------------|-------------------------------|-------------|------|---------|-----|-------|-----|
| 534    | Chlorzoxazone       | Muscle Relaxant<br>(Skeletal) | 95-25-0     |      | 190     | 170 | 1.82  | 3   |
| 535    | Cholic Acid         | Choleretic                    | 81-25-4     | Y    | 198     | 409 | 2.88  | 5   |
| 536    | Choline Alfoscerate | Nootropic                     | 28319-77-9  | Y    | 147     | 257 |       |     |
| 537    | Choline             | Cholinergic                   | 62-49-7     |      | 202     | 104 |       |     |
| 538    | Chromocarb          | Capillary Protectant          | 4940-39-0   |      | 233     | 190 | 1.63  | 4   |
| 539    | Chromonar           | Vasodilator                   | 804-10-4    |      | 187     | 361 | 3.70  | 6   |
| 540    | Cianidanol          | Antidiarrheal                 | 154-23-4    |      | 176     | 290 | 0.61  | 6   |
| 541    | Ciclactate          | Unclassified                  | 15145-14-9  |      | 140     | 214 | 2.88  | 3   |
| 542    | Ciclesonide         | Glucocorticoid                | 126544-47-6 |      | 210     | 541 | 5.30  | 7   |
| 543    | Ciclopirox          | Antifungal                    | 29342-05-0  |      | 144     | 207 | 2.57  | 3   |
| 544    | Ciclotizolam        | Anxiolytic                    | 58765-21-2  |      | 181     | 462 | 4.43  | 4   |
| 545    | Cicloxilic Acid     | Gastroprokinetic              | 57808-63-6  |      | 147     | 220 |       | 3   |
| 546    | Cicortonide         | Glucocorticoid                | 19705-61-4  |      | 214     | 566 | 4.78  | 8   |
| 547    | Cicrotoic Acid      | Choleretic                    | 25229-42-9  |      | 86      | 168 | 3.05  | 2   |
| 548    | Cidofovir           | Antiviral                     | 113852-37-2 |      | 260     | 279 | -1.47 |     |
| 549    | Cifenline           | Antiarrhythmic                | 53267-01-9  | Y    | 102     | 262 | 3.49  | 2   |
| 550    | Ciglitazone         | Antidiabetic                  | 74772-77-3  |      | 131     | 333 | 4.59  | 4   |
| 551    | Ciladopa            | Antiparkinsonian              | 80109-27-9  |      | 123     | 370 | 0.88  | 6   |
| 552    | Cilazaprilat        | Antihypertensive              | 90139-06-3  |      | 242     | 389 | 2.68  | 8   |
| 553    | Cilnidipine         | Antihypertensive              | 132203-70-4 | Y    | 109     | 493 | 5.42  | 9   |
| 554    | Cilomilast          | Bronchodilator                | 153259-65-5 |      | 157     | 343 | 2.11  | 5   |
| 555    | Cilostamide         | Erectile Dysfunction          | 68550-75-4  |      | 185     | 342 | 2.51  | 5   |
| 556    | Cilostazol          | Antithrombotic                | 73963-72-1  | Y    | 164     | 369 | 3.36  | 7   |
| 557    | Cimaterol           | Bronchodilator                | 54239-37-1  |      | 163     | 219 | 0.65  | 4   |
| 558    | Cimepanol           | Antianginal                   | 29474-12-2  |      | 101     | 156 | 3.01  | 1   |
| 559    | Cimetidine          | Antiulcerative                | 51481-61-9  | Y    | 142     | 252 | -0.07 | 6   |
| 560    | Cimetropium Bromide | Antispasmodic                 | 51598-60-8  | Y    | 174     | 438 |       |     |
| 561    | Cimicoxib           | Antiinflammatory              | 265114-23-6 |      | 212     | 382 | 2.77  | 6   |
| 562    | Cinanserin          | Antidepressant                | 1166-34-3   |      | 83      | 340 | 3.34  | 3   |
| 563    | Cinchonidine        | Antimalarial                  | 485-71-2    |      | 206     | 294 | 2.79  | 3   |
| 564    | Cinchonine          | Antimalarial                  | 118-10-5    | Y    | 256     | 294 | 2.79  | 3   |
| 565    | Cinchophen          | Analgesic                     | 132-60-5    |      | 213     | 249 | 4.18  | 3   |
| 566    | Cinepazet           | Antianginal                   | 23887-41-4  |      | 113     | 392 | 1.65  | 8   |
| 567    | Cingestol           | Progestogen                   | 16915-71-2  |      | 130     | 284 | 5.59  | 1   |
| 568    | Cinmetacin          | Antiinflammatory              | 20168-99-4  |      | 168     | 349 | 3.91  | 5   |
| 569    | Cinnamedrine        | Antispasmodic                 | 90-86-8     |      | 75      | 281 | 3.62  | 2   |
| 570    | Cinnarizine         | Antihistaminic                | 298-57-7    | Y    | 120     | 369 | 5.03  | 2   |
| 571    | Cinolazepam         | Sedative                      | 75696-02-5  | Y    | 192     | 358 | 2.24  | 5   |
| 572    | Cinoxacin           | Antibiotic                    | 28657-80-9  |      | 262     | 262 | 0.49  | 7   |
| 573    | Cinromide           | Anticonvulsant                | 58473-74-8  |      | 90      | 254 | 2.66  | 2   |
| 574    | Cintazone           | Antiinflammatory              | 2056-56-6   |      | 123     | 346 | 3.99  | 4   |
| 575    | Cintriamide         | Antipsychotic                 | 5588-21-6   |      | 162     | 237 | 0.63  | 5   |

| Number | Common Name           | Indication         | CAS Number  | Oral | MP (°C) | MW  | ClogP | HBA |
|--------|-----------------------|--------------------|-------------|------|---------|-----|-------|-----|
| 576    | Cipralisant           | Nootropic          | 213027-19-1 |      | 174     | 216 | 3.53  | 2   |
| 577    | Ciprofibrate          | Antihyperlipidemic | 52214-84-3  | Y    | 115     | 289 | 2.93  | 3   |
| 578    | Ciprofloxacin         | Antibiotic         | 85721-33-1  | Y    | 258     | 331 | 1.63  | 6   |
| 579    | Ciproquazone          | Analgesic          | 33453-23-5  |      | 116     | 306 | 2.99  | 4   |
| 580    | Ciramadol             | Analgesic          | 63269-31-8  |      | 192     | 249 | 1.88  | 3   |
| 581    | Cisapride             | Gastroprokinetic   | 81098-60-4  | Y    | 109     | 466 | 2.83  | 7   |
| 582    | Citalopram            | Antidepressant     | 59729-33-8  | Y    | 157     | 324 | 3.48  | 3   |
| 583    | Citernamide           | Anticonvulsant     | 10423-37-7  |      | 205     | 235 | 2.94  | 2   |
| 584    | Citolone              | Hepatic Protectant | 1195-16-0   |      | 111     | 159 | -0.35 | 3   |
| 585    | Citric Acid           | Anticoagulant      | 77-92-9     | Y    | 153     | 192 | -1.20 | 7   |
| 586    | Cladribine            | Antineoplastic     | 4291-63-8   |      | 219     | 286 | -0.98 | 8   |
| 587    | Clamidoxic Acid       | Antibiotic         | 6170-69-0   |      | 171     | 340 | 3.05  | 5   |
| 588    | Clamikalant           | Antiarrhythmic     | 158751-64-5 |      | 192     | 472 | 1.54  | 8   |
| 589    | Clanobutin            | Choleretic         | 30544-61-7  |      | 116     | 348 | 2.13  | 5   |
| 590    | Clantifen             | Antihistaminic     | 16562-98-4  |      | 194     | 288 | 5.28  | 3   |
| 591    | Clarithromycin        | Antibiotic         | 81103-11-9  | Y    | 222     | 748 | 2.81  | 14  |
| 592    | Clebopride            | Antiemetic         | 55905-53-8  |      | 195     | 374 | 2.70  | 5   |
| 593    | Clefamide             | Antiamebic         | 3576-64-5   |      | 136     | 399 | 1.60  | 7   |
| 594    | Clemizole             | Antihistaminic     | 442-52-4    |      | 167     | 326 | 4.29  | 3   |
| 595    | Clidanac              | Antiinflammatory   | 34148-01-1  |      | 151     | 279 | 4.89  | 2   |
| 596    | Climiqualine          | Anxiolytic         | 55150-67-9  |      | 168     | 306 | 4.39  | 3   |
| 597    | Clinafloxacin         | Antibiotic         | 105956-97-6 |      | 256     | 366 | 2.45  |     |
| 598    | Clinofibrate          | Antihyperlipidemic | 30299-08-2  | Y    | 145     | 469 | 6.33  | 6   |
| 599    | Clioquinol            | Antibacterial      | 130-26-7    |      | 176     | 306 | 4.17  | 2   |
| 600    | Clixanide             | Anthelminthic      | 14437-41-3  |      | 215     | 542 | 4.25  | 4   |
| 601    | Cliprofen             | Antiinflammatory   | 51022-75-4  |      | 83      | 295 | 2.47  | 3   |
| 602    | Clobazam              | Anxiolytic         | 22316-47-8  | Y    | 167     | 301 | 1.25  | 4   |
| 603    | Clobenzepam           | Antihistaminic     | 1159-93-9   |      | 165     | 316 | 3.51  | 4   |
| 604    | Clobenztropine        | Antihistaminic     | 5627-46-3   |      | 216     | 342 | 4.79  | 2   |
| 605    | Clobetasol Propionate | Glucocorticoid     | 25122-46-7  |      | 196     | 467 | 3.14  | 5   |
| 606    | Clobetasone Butyrate  | Glucocorticoid     | 25122-57-0  |      | 95      | 479 | 3.55  | 5   |
| 607    | Clobuzarit            | Antirheumatic      | 22494-47-9  |      | 155     | 305 | 4.34  | 3   |
| 608    | Clocortolone Acetate  | Glucocorticoid     | 4258-85-9   |      | 252     | 453 | 2.48  | 5   |
| 609    | Clofarabine           | Antineoplastic     | 123318-82-1 |      | 231     | 304 | 0.45  | 8   |
| 610    | Clofazimine           | Antibacterial      | 2030-63-9   |      | 214     | 473 | 7.46  | 4   |
| 611    | Clofenamic Acid       | Antiinflammatory   | 4295-55-0   |      | 254     | 282 | 5.57  | 3   |
| 612    | Clofenamide           | Diuretic           | 671-95-4    |      | 213     | 271 | -0.28 | 6   |
| 613    | Clofenoxyde           | Unclassified       | 3030-53-3   |      | 105     | 323 | 2.88  | 3   |
| 614    | Clofexamide           | Antiinflammatory   | 1223-36-5   |      | 45      | 385 | 2.81  | 4   |
| 615    | Clofibric Acid        | Antihyperlipidemic | 882-09-7    |      | 118     | 215 | 2.43  | 3   |
| 616    | Clofibride            | Antihyperlipidemic | 26717-47-5  |      | 34      | 328 | 3.11  | 5   |
| 617    | Clofoctol             | Antibiotic         | 37693-01-9  |      | 78      | 365 | 8.25  | 1   |
| 618    | Cloforex              | Anorexic           | 14261-75-7  |      | 53      | 256 | 3.45  | 3   |



| Number | Common Name           | Indication            | CAS Number | Oral | MP (°C) | MW  | ClogP | HBA |
|--------|-----------------------|-----------------------|------------|------|---------|-----|-------|-----|
| 619    | Clogestone Acetate    | Progestogen           | 3044-32-4  |      | 204     | 449 | 4.94  | 5   |
| 620    | Clomegestone Acetate  | Progestogen           | 424-89-5   |      | 194     | 419 | 4.33  | 4   |
| 621    | Clometacin            | Analgesic             | 25803-14-9 |      | 242     | 358 | 4.43  | 5   |
| 622    | Clomethiazole         | Sedative              | 533-45-9   |      | 153     | 162 | 1.71  | 1   |
| 623    | Clominorex            | Anorexic              | 3876-10-6  |      | 119     | 197 | 1.55  | 3   |
| 624    | Clomipramine          | Antidepressant        | 303-49-1   | Y    | 190     | 315 | 4.94  | 2   |
| 625    | Clonazepam            | Anticonvulsant        | 1622-61-3  | Y    | 238     | 316 | 2.52  | 6   |
| 626    | Clonidine             | Antihypertensive      | 4205-90-7  | Y    | 136     | 230 | 2.36  | 3   |
| 627    | Clonitazene           | Analgesic             | 3861-76-5  |      | 76      | 387 | 4.43  | 6   |
| 628    | Clonixin              | Analgesic             | 17737-65-4 |      | 234     | 263 | 4.71  | 4   |
| 629    | Cloperidone           | Sedative              | 4052-13-5  |      | 196     | 399 | 3.45  | 6   |
| 630    | Clopidol              | Antibacterial         | 2971-90-6  |      | 350     | 192 | 2.04  | 2   |
| 631    | Cloponone             | Respiratory Stimulant | 85409-44-5 |      | 119     | 329 | 3.33  | 3   |
| 632    | Cloquinozine          | Diuretic              | 5220-68-8  |      | 70      | 264 | 4.79  | 1   |
| 633    | Cloracetadol          | Analgesic             | 15687-05-5 |      | 160     | 299 | 1.76  | 4   |
| 634    | Cloranolol            | Antiarrhythmic        | 39563-28-5 |      | 83      | 292 | 3.66  | 3   |
| 635    | Clorethate            | Sedative              | 5634-37-7  |      | 85      | 325 | 4.00  | 3   |
| 636    | Clorexolone           | Diuretic              | 2127-01-7  |      | 267     | 329 | 1.78  | 5   |
| 637    | Cloricromen           | Antithrombotic        | 68206-94-0 |      | 148     | 396 | 3.55  | 6   |
| 638    | Cloridarol            | Vasodilator           | 3611-72-1  |      | 49      | 259 | 3.80  | 2   |
| 639    | Clorindanic Acid      | Antibiotic            | 153-43-5   |      | 278     | 213 | 4.10  | 3   |
| 640    | Clorindione           | Anticonvulsant        | 1146-99-2  |      | 140     | 257 | 3.90  | 2   |
| 641    | Cloroqualone          | Sedative              | 25509-07-3 |      | 168     | 319 | 4.00  | 3   |
| 642    | Clorotepine           | Antipsychotic         | 13448-22-1 |      | 100     | 345 | 3.68  | 2   |
| 643    | Clorprenaline         | Bronchodilator        | 3811-25-4  |      | 82      | 214 | 2.21  | 2   |
| 644    | Clorsulon             | Anthelmintic          | 60200-06-8 |      | 203     | 381 | 1.25  | 7   |
| 645    | Closantel             | Anthelmintic          | 57808-65-8 |      | 218     | 663 | 8.30  | 4   |
| 646    | Clostebol             | Steroid               | 1093-58-9  |      | 189     | 323 | 3.64  | 2   |
| 647    | Clothiapine           | Antipsychotic         | 2058-52-8  |      | 119     | 344 | 4.25  | 3   |
| 648    | Clotiazepam           | Anxiolytic            | 33671-46-4 | Y    | 113     | 319 | 3.95  | 3   |
| 649    | Clotioxone            | Analgesic             | 1856-34-4  |      | 127     | 311 | 3.78  | 4   |
| 650    | Clotrimazole          | Antifungal            | 23593-75-1 | Y    | 147     | 345 | 4.92  | 2   |
| 651    | Cloxacepride          | Antihistaminic        | 65569-29-1 |      | 172     | 468 | 4.04  | 7   |
| 652    | Cloxazolam            | Anxiolytic            | 24166-13-0 |      | 203     | 349 | 0.87  | 4   |
| 653    | Cloxestradiol         | Estrogen              | 54063-33-1 |      | 174     | 420 | 6.43  | 3   |
| 654    | Cloxtotestosterone    | Androgen              | 53608-96-1 |      | 201     | 436 | 5.46  | 3   |
| 655    | Cloxyquin             | Antibacterial         | 130-16-5   |      | 125     | 180 | 2.79  | 2   |
| 656    | Clozapine             | Antipsychotic         | 5786-21-0  | Y    | 183     | 327 | 3.94  | 4   |
| 657    | Cocaine               | Anesthetic            | 50-36-2    |      | 98      | 303 | 2.28  | 5   |
| 658    | Codeine               | Antitussive           | 76-57-3    | Y    | 155     | 299 | 1.39  | 4   |
| 659    | Colchicine            | Anticholelithogenic   | 64-86-8    | Y    | 155     | 399 | 1.07  | 7   |
| 660    | Colforsin             | Bronchodilator        | 66575-29-9 |      | 230     | 411 | 2.41  | 7   |
| 661    | Colfosceril Palmitate | Respiratory Stimulant | 63-89-8    |      | 42      | 734 |       |     |

| Number | Common Name                  | Indication       | CAS Number  | Oral | MP (°C) | MW  | ClogP | HBA |
|--------|------------------------------|------------------|-------------|------|---------|-----|-------|-----|
| 662    | Colterol Mesylate            | Bronchodilator   | 18866-78-9  |      | 141     | 225 | 0.74  | 4   |
| 663    | Conessine Hydrobromide       | Analgesic        | 546-06-5    |      | 124     | 357 | 6.06  | 2   |
| 664    | Cortisone Acetate            | Glucocorticoid   | 50-04-4     |      | 240     | 402 | 2.05  | 6   |
| 665    | Cortivazol                   | Glucocorticoid   | 1110-40-3   |      | 226     | 531 | 6.01  | 7   |
| 666    | Cortodoxone                  | Antiinflammatory | 152-58-9    |      | 208     | 436 | 2.74  | 4   |
| 667    | Cotinine                     | Antidepressant   | 486-56-6    |      | 48      | 176 | 0.08  | 3   |
| 668    | Coumaphos                    | Antineoplastic   | 56-72-4     |      | 92      | 363 | 5.11  | 5   |
| 669    | Coumarin                     | Anticoagulant    | 91-64-5     |      | 69      | 146 | 1.39  | 2   |
| 670    | Coumetarol                   | Anticoagulant    | 4366-18-1   |      | 157     | 380 | 1.91  | 7   |
| 671    | Crisnatol Mesylate           | Antineoplastic   | 96389-68-3  |      | 201     | 345 | 4.29  | 3   |
| 672    | Croconazole                  | Antifungal       | 77175-51-0  |      | 73      | 311 | 4.41  | 3   |
| 673    | Cromolyn                     | Bronchodilator   | 16110-51-3  | Y    | 242     | 468 | 2.00  | 11  |
| 674    | Cronidipine                  | Antihypertensive | 113759-50-5 |      | 78      | 598 | 6.00  | 11  |
| 675    | Crufomate                    | Anthelmintic     | 299-86-5    |      | 63      | 292 | 3.39  | 4   |
| 676    | Cyacetacide                  | Antibacterial    | 140-87-4    |      | 115     | 99  | -2.22 | 4   |
| 677    | Cyclacillin                  | Antibiotic       | 3485-14-1   |      | 157     | 341 | 1.21  | 7   |
| 678    | Cyclandelate                 | Vasodilator      | 456-59-7    | Y    | 49      | 276 | 4.24  | 3   |
| 679    | Cyclarbamate                 | Anxiolytic       | 5779-54-4   |      | 152     | 368 | 4.50  | 6   |
| 680    | Cyclazocine                  | Antidote         | 3572-80-3   |      | 206     | 271 | 3.52  | 2   |
| 681    | Cyclazodone                  | Antidepressant   | 14461-91-7  |      | 140     | 216 | 1.18  | 4   |
| 682    | Cyclindole                   | Antidepressant   | 32211-97-5  |      | 140     | 214 | 2.33  | 2   |
| 683    | Cyclizine                    | Antiemetic       | 82-92-8     |      | 106     | 266 | 2.47  | 2   |
| 684    | Cyclobarbitol                | Sedative         | 52-31-3     |      | 173     | 236 | 1.50  | 5   |
| 685    | Cyclobendazole               | Anthelmintic     | 31431-43-3  |      | 251     | 259 | 1.87  | 6   |
| 686    | Cyclobutylol                 | Choleretic       | 512-16-3    |      | 82      | 186 | 1.50  | 3   |
| 687    | Cyclocumarol                 | Anticoagulant    | 518-20-7    |      | 166     | 322 | 3.82  | 4   |
| 688    | Cyclofenil                   | Androgen         | 2624-43-3   |      | 137     | 364 | 4.66  | 4   |
| 689    | Cycloguanil Pamoate          | Antimalarial     | 516-21-2    |      | 148     | 252 | 0.95  | 5   |
| 690    | Cycloheximide                | Antineoplastic   | 66-81-9     |      | 116     | 281 | 0.55  | 5   |
| 691    | Cyclomenol                   | Antiarrhythmic   | 5591-47-9   |      | 83      | 204 | 4.66  | 1   |
| 692    | Cyclopentiazide              | Antihypertensive | 742-20-1    | Y    | 234     | 380 | 2.23  | 7   |
| 693    | Cyclopentobarbital<br>sodium | Sedative         | 76-68-6     |      | 139     | 234 | 0.99  | 5   |
| 694    | Cyclophosphamide             | Antineoplastic   | 50-18-0     |      | 47      | 261 | 0.73  | 4   |
| 695    | Cyclopregnol                 | Progestogen      | 465-53-2    |      | 182     | 316 | 4.39  | 2   |
| 696    | Cycloserine                  | Antibacterial    | 68-41-7     | Y    | 156     | 102 | -2.99 | 4   |
| 697    | Cyclothiazide                | Diuretic         | 2259-96-3   |      | 234     | 390 | 1.73  | 7   |
| 698    | Cyclovalone                  | Choleretic       | 579-23-7    |      | 175     | 366 | 3.96  | 5   |
| 699    | Cycrimine                    | Antispasmodic    | 77-39-4     |      | 89      | 287 | 3.86  | 2   |
| 700    | Cyheptamide                  | Anticonvulsant   | 7199-29-3   |      | 201     | 237 | 2.83  | 2   |
| 701    | Cynarine                     | Choleretic       | 30964-13-7  |      | 231     | 516 | 1.74  | 12  |
| 702    | Cyprazepam                   | Sedative         | 15687-07-7  |      | 239     | 340 | 3.39  | 4   |
| 703    | Cyproheptadine               | Antihistaminic   | 129-03-3    | Y    | 113     | 287 | 5.82  | 1   |

| Number | Common Name           | Indication                    | CAS Number  | Oral | MP (°C) | MW  | ClogP | HBA |
|--------|-----------------------|-------------------------------|-------------|------|---------|-----|-------|-----|
| 704    | Cyprolidol            | Antidepressant                | 4904-00-1   |      | 166     | 301 | 3.28  | 2   |
| 705    | Cyproquinat           | Antibacterial                 | 19485-08-6  |      | 288     | 357 | 3.89  | 6   |
| 706    | Cyproterone Acetate   | Antineoplastic                | 427-51-0    | Y    | 201     | 417 | 4.22  | 4   |
| 707    | Cyproximide           | Antipsychotic                 | 66537-94-8  |      | 150     | 222 | 1.88  | 3   |
| 708    | Cyromazine            | Antihistaminic                | 66215-27-8  |      | 221     | 166 | -0.04 | 6   |
| 709    | Cysteamine            | Antidote                      | 60-23-1     | Y    | 99      | 77  | 0.22  | 1   |
| 710    | Cytarabine            | Antineoplastic                | 147-94-4    |      | 213     | 243 | -1.81 | 8   |
| 711    | Dabigatran            | Antithrombotic                | 211914-51-1 | Y    | 277     | 472 | 1.02  | 10  |
| 712    | Dabigatran Etxilate   | Antithrombotic                | 211915-06-9 | Y    | 129     | 628 | 4.80  | 12  |
| 713    | Dacarbazine           | Antineoplastic                | 4342-03-4   |      | 205     | 182 | 0.03  | 7   |
| 714    | Dacemazine            | Antihistaminic                | 518-61-6    |      | 147     | 284 | 3.06  | 3   |
| 715    | Dacisteine            | Unclassified                  | 18725-37-6  |      | 112     | 205 | -0.86 | 5   |
| 716    | Dalcotidine           | Antiulcerative                | 120958-90-9 |      | 81      | 319 | 2.43  | 5   |
| 717    | Damotepine            | Antipsychotic                 | 1469-07-4   |      | 115     | 267 | 4.51  | 1   |
| 718    | Danazol               | Steroid                       | 17230-88-5  | Y    | 226     | 337 | 4.94  | 3   |
| 719    | Daniquidone           | Antineoplastic                | 67199-66-0  |      | 280     | 249 | 0.97  | 4   |
| 720    | Danitracen            | Antidepressant                | 31232-26-5  |      | 229     | 291 | 1.83  | 2   |
| 721    | Danosteine            | Antitussive                   | 4938-00-5   |      | 94      | 164 | 0.36  | 4   |
| 722    | Danthron              | Laxative                      | 117-10-2    |      | 193     | 240 | 4.00  | 4   |
| 723    | Dantrolene            | Muscle Relaxant<br>(Skeletal) | 7261-97-4   | Y    | 276     | 314 | 1.07  | 9   |
| 724    | Dapiprazole           | Antiglaucoma                  | 72822-12-9  |      | 159     | 325 | 2.89  | 5   |
| 725    | Dapsone               | Antibiotic                    | 80-08-0     | Y    | 176     | 248 | 0.99  | 4   |
| 726    | Darunavir             | Antiviral                     | 206361-99-1 | Y    | 74      | 547 | 3.21  | 10  |
| 727    | Daunorubicin          | Antineoplastic                | 20830-81-3  |      | 209     | 528 | 0.54  | 11  |
| 728    | Dazmegrel             | Anticoagulant                 | 76894-77-4  |      | 196     | 283 | 1.67  | 5   |
| 729    | Dazoquinast           | Bronchodilator                | 76002-75-0  |      | 275     | 213 | 1.39  | 5   |
| 730    | Deanol Aceglumate     | Nootropic                     | 1188-37-0   |      | 198     | 189 | -2.13 | 6   |
| 731    | Decamethonium Bromide | Muscle Relaxant<br>(Skeletal) | 541-22-0    |      | 260     | 418 |       |     |
| 732    | Decimemide            | Anticonvulsant                | 14817-09-5  |      | 122     | 337 | 5.04  | 5   |
| 733    | Decitabine            | Antineoplastic                | 2353-33-5   |      | 198     | 228 | -1.87 | 8   |
| 734    | Decoquinat            | Antibacterial                 | 18507-89-6  |      | 245     | 418 | 7.19  | 6   |
| 735    | Deditonium Bromide    | Antispasmodic                 | 2401-56-1   |      | 165     | 743 |       |     |
| 736    | Deferiprone           | Antidote                      | 30652-11-0  | Y    | 260     | 139 | -0.65 | 3   |
| 737    | Deferitrin            | Antidote                      | 239101-33-8 |      | 282     | 253 | 2.88  | 5   |
| 738    | Deferoxamine Mesylate | Antidote                      | 70-51-9     |      | 139     | 561 | -0.61 | 14  |
| 739    | Deflazacort           | Antiinflammatory              | 14484-47-0  | Y    | 256     | 442 | 2.05  | 7   |
| 740    | Dehydrocholic Acid    | Choleretic                    | 81-23-2     |      | 237     | 403 | 1.89  | 5   |
| 741    | Dehydroemetine        | Antiamebic                    | 4914-30-1   |      | 95      | 478 | 3.95  | 6   |
| 742    | Delavirdine           | Antiviral                     | 136817-59-9 | Y    | 226     | 456 | 3.53  | 9   |
| 743    | Delfantrine           | Antimalarial                  | 3436-11-1   |      | 151     | 326 | -0.22 | 7   |
| 744    | Delmadinone Acetate   | Progestogen                   | 13698-49-2  |      | 168     | 403 | 3.16  | 4   |

| Number | Common Name                       | Indication       | CAS Number  | Oral | MP (°C) | MW  | ClogP | HBA |
|--------|-----------------------------------|------------------|-------------|------|---------|-----|-------|-----|
| 745    | Delorazepam                       | Sedative         | 2894-67-9   |      | 199     | 305 | 2.94  | 3   |
| 746    | Demecarium Bromide                | Cholinergic      | 56-94-0     |      | 165     | 717 |       |     |
| 747    | Demeclocycline                    | Antibiotic       | 127-33-3    | Y    | 176     | 465 | 0.94  | 10  |
| 748    | Demecolcine                       | Antineoplastic   | 477-30-5    |      | 184     | 371 | 1.63  | 6   |
| 749    | Demegestone                       | Progestogen      | 10116-22-0  |      | 103     | 312 | 3.44  | 2   |
| 750    | Demelverine                       | Antispasmodic    | 13977-33-8  |      | 160     | 239 | 3.99  | 1   |
| 751    | Demoxepam                         | Anxiolytic       | 963-39-3    |      | 232     | 287 | 0.73  | 4   |
| 752    | Denopamine                        | Cardiotonic      | 71771-90-9  |      | 162     | 317 | 1.80  | 5   |
| 753    | Denzimol                          | Anticonvulsant   | 73931-96-1  |      | 163     | 292 | 3.28  | 3   |
| 754    | Deoxycholic Acid                  | Choleretic       | 83-44-3     |      | 175     | 393 | 4.76  | 4   |
| 755    | Depramine                         | Antidepressant   | 303-54-8    |      | 57      | 278 | 4.29  | 2   |
| 756    | Deprodone                         | Antidepressant   | 20423-99-8  |      | 253     | 344 | 1.94  | 4   |
| 757    | Desciclovir                       | Antiviral        | 84408-37-7  |      | 189     | 209 | -1.32 | 7   |
| 758    | Descinolone Acetonide             | Glucocorticoid   | 2135-14-0   |      | 295     | 419 | 2.69  | 5   |
| 759    | Deserpidine                       | Antihypertensive | 131-01-1    |      | 230     | 579 | 4.95  | 10  |
| 760    | Desipramine                       | Antidepressant   | 50-47-5     | Y    | 25      | 266 | 3.97  | 2   |
| 761    | Desloratadine                     | Antihistaminic   | 100643-71-8 | Y    | 155     | 311 | 3.50  | 2   |
| 762    | Desmethylmoramide                 | Analgesic        | 1767-88-0   |      | 148     | 379 | 2.17  | 4   |
| 763    | Desogestrel                       | Progestogen      | 54024-22-5  | Y    | 110     | 310 | 5.35  | 1   |
| 764    | Desomorphine                      | Analgesic        | 427-00-9    |      | 185     | 271 | 1.34  | 3   |
| 765    | Desonide                          | Antiinflammatory | 638-94-8    |      | 269     | 417 | 2.57  | 6   |
| 766    | Desoximetasone                    | Antiinflammatory | 382-67-2    |      | 219     | 376 | 2.22  | 4   |
| 767    | Desoxycorticosterone<br>Acetate   | Steroid          | 56-47-3     |      | 157     | 373 | 3.57  | 4   |
| 768    | Desoxycorticosterone<br>Pivalate  | Steroid          | 808-48-0    |      | 201     | 415 | 4.85  | 4   |
| 769    | Deterenol                         | Adrenergic       | 7376-66-1   |      | 138     | 195 | 0.99  | 3   |
| 770    | Detomidine                        | Analgesic        | 76631-46-4  |      | 115     | 186 | 2.59  | 2   |
| 771    | Dexamethasone                     | Glucocorticoid   | 50-02-2     | Y    | 263     | 392 | 2.03  | 5   |
| 772    | Dexamethasone Acetate             | Glucocorticoid   | 1177-87-3   |      | 230     | 435 | 2.65  | 6   |
| 773    | Dexamethasone Sodium<br>Phosphate | Glucocorticoid   | 2392-39-4   |      | 234     | 516 |       |     |
| 774    | Dexetimide                        | Antiparkinsonian | 21888-98-2  |      | 182     | 362 | 2.83  | 4   |
| 775    | Dexfosfoserine                    | Antifungal       | 407-41-0    |      | 168     | 185 | -3.26 | 7   |
| 776    | Dexibuprofen                      | Analgesic        | 51146-56-6  |      | 63      | 206 | 3.50  | 2   |
| 777    | Deximafen                         | Antidepressant   | 42116-77-8  |      | 53      | 187 | 1.25  | 3   |
| 778    | Dexindoprofen                     | Analgesic        | 53086-13-8  |      | 209     | 281 | 2.82  | 4   |
| 779    | Dxivacaine                        | Anesthetic       | 24358-84-7  |      | 149     | 246 | 1.78  | 3   |
| 780    | Dexketoprofen                     | Analgesic        | 22161-81-5  | Y    | 78      | 254 | 2.91  | 3   |
| 781    | Dexpanthenol                      | Cholinergic      | 81-13-0     |      | 40      | 205 | -0.99 | 5   |
| 782    | Dexpemadolac                      | Analgesic        | 114030-44-3 |      | 171     | 349 | 4.74  | 4   |
| 783    | Dexpropranolol                    | Antiarrhythmic   | 5051-22-9   |      | 72      | 259 | 2.90  | 3   |
| 784    | Dexrazoxane                       | Antianginal      | 24584-09-6  |      | 194     | 268 | -0.91 | 8   |

| Number | Common Name                        | Indication         | CAS Number  | Oral | MP (°C) | MW  | ClogP | HBA |
|--------|------------------------------------|--------------------|-------------|------|---------|-----|-------|-----|
| 785    | Dextilidine                        | Antihistaminic     | 32447-90-8  |      | 57      | 273 | 4.62  | 3   |
| 786    | Dextromoramide                     | Analgesic          | 357-56-2    | Y    | 182     | 393 | 2.53  | 4   |
| 787    | Dextrorphan                        | Analgesic          | 125-73-5    |      | 197     | 257 | 3.26  | 2   |
| 788    | Dextrothyroxine                    | Antihyperlipidemic | 51-49-0     |      | 230     | 777 | 4.72  | 5   |
| 789    | Diacerein                          | Antirheumatic      | 13739-02-1  | Y    | 218     | 368 | 3.13  | 8   |
| 790    | Diacetamate                        | Analgesic          | 2623-33-8   |      | 151     | 193 | 0.79  | 4   |
| 791    | Diacetylmorphine                   | Analgesic          | 561-27-3    |      | 172     | 369 | 1.58  | 6   |
| 792    | Diacetylnalorphine                 | Analgesic          | 2748-74-5   |      | 141     | 395 | 2.30  | 6   |
| 793    | Diamfenetide                       | Anthelmintic       | 36141-82-9  |      | 164     | 372 | 1.67  | 7   |
| 794    | Diaplasinin                        | Anticoagulant      | 481631-45-2 |      | 113     | 502 | 8.09  | 6   |
| 795    | Diarbarone                         | Unclassified       | 1233-70-1   |      | 155     | 304 | 2.24  | 6   |
| 796    | Diathymosulfone                    | Antibacterial      | 5964-62-5   |      | 223     | 571 | 8.10  | 8   |
| 797    | Diaveridine                        | Antibacterial      | 5355-16-8   |      | 232     | 260 | 0.95  | 6   |
| 798    | Diazepam                           | Anxiolytic         | 439-14-5    | Y    | 129     | 285 | 2.80  | 3   |
| 799    | Diaziquone                         | Antineoplastic     | 57998-68-2  |      | 229     | 364 | -0.02 | 10  |
| 800    | Diazoxide                          | Antihypertensive   | 364-98-7    | Y    | 329     | 231 | 1.19  | 4   |
| 801    | Dibemethine                        | Antineoplastic     | 102-05-6    |      | 49      | 211 | 3.12  | 1   |
| 802    | Dibenzepin                         | Antidepressant     | 4498-32-2   |      | 117     | 295 | 3.26  | 4   |
| 803    | Dibenzothiophene                   | Dermatologic       | 132-65-0    |      | 98      | 184 | 4.49  | 0   |
| 804    | Dibucaine                          | Anesthetic         | 85-79-0     |      | 65      | 343 | 4.76  | 5   |
| 805    | Dibuprol                           | Choleretic         | 2216-77-5   |      | 250     | 204 | 2.58  | 3   |
| 806    | Dibutoline Sulfate                 | Antispasmodic      | 532-49-0    |      | 166     | 322 |       |     |
| 807    | Dicarfen                           | Antiinflammatory   | 15585-88-3  |      | 180     | 312 | 3.94  | 4   |
| 808    | Dichlorisone Acetate               | Dermatologic       | 79-61-8     |      | 250     | 455 | 3.45  | 5   |
| 809    | Dichloromezanone                   | Anxiolytic         | 114676-16-3 |      | 124     | 308 | 1.08  | 4   |
| 810    | Dichlorophene                      | Anthelmintic       | 97-23-4     |      | 174     | 269 | 4.35  | 2   |
| 811    | Dichloroxylenol                    | Anesthetic         | 133-53-9    |      | 90      | 191 | 3.94  | 1   |
| 812    | Dichlorphenamide                   | Antiglaucoma       | 120-97-8    | Y    | 235     | 305 | 0.34  | 6   |
| 813    | Dichlorvos                         | Anthelmintic       | 62-73-7     |      | 294     | 221 | 1.07  | 4   |
| 814    | Diclofenac                         | Antiinflammatory   | 15307-86-5  | Y    | 157     | 296 | 4.55  | 3   |
| 815    | Diclonixin                         | Analgesic          | 17737-68-7  |      | 251     | 283 | 4.83  | 4   |
| 816    | Dicloralurea                       | Antibacterial      | 116-52-9    |      | 195     | 355 | 1.17  | 5   |
| 817    | Didoxacillin                       | Antibiotic         | 3116-76-5   | Y    | 218     | 470 | 3.10  | 8   |
| 818    | Dicumarol                          | Anticoagulant      | 66-76-2     |      | 290     | 336 | 2.05  | 6   |
| 819    | Didanosine                         | Antiviral          | 69655-05-6  | Y    | 162     | 236 | -1.43 | 8   |
| 820    | Didrovaltrate                      | Sedative           | 18296-45-2  |      | 63      | 424 | 1.87  | 8   |
| 821    | Dieldrin                           | Dermatologic       | 60-57-1     |      | 176     | 381 | 4.48  | 1   |
| 822    | Dienestrol                         | Estrogen           | 84-17-3     |      | 228     | 266 | 4.92  | 2   |
| 823    | Diethadione                        | Anticonvulsant     | 702-54-5    |      | 98      | 171 | 0.96  | 4   |
| 824    | Diethylcarbamazine                 | Anthelmintic       | 90-89-1     | Y    | 57      | 199 | 1.66  | 4   |
| 825    | Diethylstilbestrol                 | Antineoplastic     | 56-53-1     | Y    | 172     | 268 | 5.33  | 2   |
| 826    | Diethylstilbestrol<br>Dipropionate | Antineoplastic     | 130-80-3    |      | 105     | 380 | 5.69  | 4   |

| Number | Common Name                   | Indication          | CAS Number | Oral | MP (°C) | MW  | ClogP | HBA |
|--------|-------------------------------|---------------------|------------|------|---------|-----|-------|-----|
| 827    | Difemerine                    | Antispasmodic       | 80387-96-8 |      | 78      | 327 | 2.23  | 4   |
| 828    | Difemetorex                   | Anorexic            | 13862-07-2 |      | 107     | 295 | 3.70  | 2   |
| 829    | Difenamizole                  | Analgesic           | 20170-20-1 |      | 124     | 334 | 3.06  | 5   |
| 830    | Difeterol                     | Adrenergic          | 14587-50-9 |      | 73      | 376 | 4.50  | 3   |
| 831    | Diflorasone Diacetate         | Antiinflammatory    | 33564-31-7 |      | 222     | 495 | 2.45  | 7   |
| 832    | Difloxacin                    | Antibiotic          | 98106-17-3 |      | 281     | 399 | 0.84  | 6   |
| 833    | Diflucortolone                | Glucocorticoid      | 2607-06-9  |      | 245     | 394 | 2.03  | 4   |
| 834    | Diflucortolone Pivalate       | Antiinflammatory    | 15845-96-2 |      | 195     | 479 | 3.66  | 5   |
| 835    | Diflunisal                    | Antiinflammatory    | 22494-42-4 | Y    | 208     | 250 | 3.65  | 3   |
| 836    | Difluprednate                 | Antiinflammatory    | 23674-86-4 |      | 185     | 509 | 2.94  | 7   |
| 837    | Diftalone                     | Antiinflammatory    | 21626-89-1 |      | 224     | 264 | 1.11  | 4   |
| 838    | Digitoxin                     | Cardiotonic         | 71-63-6    |      | 254     | 765 | 2.74  | 13  |
| 839    | Digoxin                       | Cardiotonic         | 20830-75-5 | Y    | 255     | 781 | 1.29  | 14  |
| 840    | Dihexyverine                  | Anticholelithogenic | 561-77-3   |      | 188     | 322 | 5.65  | 3   |
| 841    | Dihydralazine                 | Vasodilator         | 484-23-1   |      | 187     | 190 | 0.74  | 6   |
| 842    | Dihydrocodeine Bitartrate     | Analgesic           | 125-28-0   | Y    | 90      | 301 | 0.61  | 4   |
| 843    | Dihydroergotamine<br>Mesylate | Antimigraine        | 511-12-6   |      | 233     | 584 |       | 10  |
| 844    | Dihydrotachysterol            | Steroid             | 67-96-9    |      | 127     | 399 | 9.66  | 1   |
| 845    | Diisopropanolamine            | Decongestant        | 110-97-4   |      | 45      | 133 | -1.05 | 3   |
| 846    | Dilmefone                     | Anticonvulsant      | 37398-31-5 |      | 107     | 269 | 2.37  | 4   |
| 847    | Diloxanide                    | Antiamebic          | 579-38-4   |      | 174     | 234 | 1.67  | 3   |
| 848    | Diloxanide Furoate            | Antiamebic          | 3736-81-0  |      | 114     | 328 | 2.14  | 5   |
| 849    | Diltiazem                     | Antianginal         | 42399-41-7 | Y    | 213     | 415 | 4.73  | 6   |
| 850    | Dimabefylline                 | Bronchodilator      | 1703-48-6  |      | 186     | 313 | 0.53  | 7   |
| 851    | Dimecrotic Acid               | Choleretic          | 7706-67-4  |      | 147     | 222 | 2.72  | 4   |
| 852    | Dimefadane                    | Analgesic           | 5581-40-8  |      | 67      | 237 | 3.24  | 1   |
| 853    | Dimeflin                      | Nootropic           | 1165-48-6  |      | 110     | 323 | 3.73  | 4   |
| 854    | Dimenhydrinate                | Antiemetic          | 85-18-7    | Y    | 292     | 215 | -0.52 | 6   |
| 855    | Dimepheptanol                 | Analgesic           | 545-90-4   |      | 111     | 311 | 3.95  | 2   |
| 856    | Dimepregnen                   | Progestogen         | 21208-26-4 |      | 133     | 345 | 5.81  | 2   |
| 857    | Dimercaprol                   | Antidote            | 59-52-9    |      | 77      | 124 | 0.63  | 1   |
| 858    | Dimestrol                     | Estrogen            | 130-79-0   |      | 123     | 296 | 5.85  | 2   |
| 859    | Dimethadione                  | Anticonvulsant      | 695-53-4   |      | 71      | 129 | 0.77  | 4   |
| 860    | Dimethazan                    | Antidepressant      | 519-30-2   |      | 95      | 251 | -0.45 | 7   |
| 861    | Dimethisoquin                 | Anesthetic          | 86-80-6    |      | 146     | 272 | 4.04  | 3   |
| 862    | Dimethisterone                | Progestogen         | 79-64-1    |      | 101     | 341 | 4.54  | 2   |
| 863    | Dimethyl Fumarate             | Immunomodulator     | 624-49-7   | Y    | 103     | 144 | 0.43  | 4   |
| 864    | Dimethyl Sulfoxide            | Urologic            | 67-68-5    |      | 67      | 78  | -1.41 | 1   |
| 865    | Dimetofrine                   | Antihypertensive    | 22950-29-4 |      | 178     | 227 | -0.33 | 5   |
| 866    | Dimetridazole                 | Antiprotozoal       | 551-92-8   |      | 139     | 141 | 0.10  | 5   |
| 867    | Diminazene                    | Analgesic           | 536-71-0   |      | 98      | 281 | 1.80  | 7   |
| 868    | Dimorpholamine                | Nootropic           | 119-48-2   |      | 42      | 399 | 3.40  | 8   |

| Number | Common Name          | Indication           | CAS Number  | Oral | MP (°C) | MW  | ClogP | HBA |
|--------|----------------------|----------------------|-------------|------|---------|-----|-------|-----|
| 869    | Dinitolmide          | Antibacterial        | 148-01-6    |      | 179     | 225 | 0.66  | 8   |
| 870    | Dinoprost            | Oxytocic             | 551-11-1    | Y    | 30      | 354 | 2.59  | 5   |
| 871    | Dinoprostone         | Oxytocic             | 363-24-6    |      | 98      | 352 | 2.97  | 5   |
| 872    | Dinsed               | Antibacterial        | 96-62-8     |      | 188     | 430 | 0.35  | 12  |
| 873    | Diosmin              | Capillary Protectant | 520-27-4    | Y    | 277     | 609 | 0.36  | 15  |
| 874    | Dioxaphetyl Butyrate | Antispasmodic        | 467-86-7    |      | 69      | 353 | 3.06  | 4   |
| 875    | Dioxybenzone         | Dermatologic         | 131-53-3    |      | 68      | 244 | 4.31  | 4   |
| 876    | Dioxyline Phosphate  | Cardiotonic          | 147-27-3    |      | 125     | 367 | 3.83  | 5   |
| 877    | Dipenine Bromide     | Antispasmodic        | 2001-81-2   |      | 186     | 404 |       |     |
| 878    | Diphenhydramine      | Antihistaminic       | 58-73-1     | Y    | 156     | 255 | 3.00  | 2   |
| 879    | Diphenidol           | Antiemetic           | 972-02-1    | Y    | 104     | 309 | 3.13  | 2   |
| 880    | Dipivefrin           | Mydriatic            | 52365-63-6  | Y    | 147     | 351 | 2.69  | 6   |
| 881    | Diprenorphine        | Antidote             | 14357-78-9  |      | 188     | 426 | 1.55  | 5   |
| 882    | Diproqualone         | Sedative             | 36518-02-2  |      | 144     | 234 | 0.15  | 5   |
| 883    | Diproxadol           | Analgesic            | 52042-24-7  |      | 88      | 272 | 0.24  | 5   |
| 884    | Dipyridamole         | Antithrombotic       | 58-32-2     | Y    | 163     | 505 | 3.35  | 12  |
| 885    | Dipyrrithione        | Antibacterial        | 3696-28-4   |      | 204     | 252 | -1.92 | 4   |
| 886    | Dipyrrocetyl         | Analgesic            | 486-79-3    |      | 153     | 238 | 1.10  | 6   |
| 887    | Dirithromycin        | Antibiotic           | 62013-04-1  | Y    | 187     | 835 | 3.38  | 16  |
| 888    | Disobutamide         | Antiarrhythmic       | 68284-69-5  |      | 131     | 408 | 4.31  | 4   |
| 889    | Disogluside          | Unclassified         | 14144-06-0  |      | 260     | 577 | 4.74  | 8   |
| 890    | Disopyramide         | Antiarrhythmic       | 3737-09-5   | Y    | 96      | 339 | 2.33  | 4   |
| 891    | Disoxaril            | Antiviral            | 87495-31-6  |      | 88      | 342 | 4.76  | 5   |
| 892    | Disulfiram           | Alcohol Deterrant    | 97-77-8     | Y    | 71      | 297 | 3.82  | 2   |
| 893    | Ditazole             | Antiinflammatory     | 18471-20-0  |      | 97      | 324 | 2.35  | 5   |
| 894    | Dithiazanine Iodide  | Anthelmintic         | 514-73-8    |      | 255     | 518 |       |     |
| 895    | Ditolamide           | Antibiotic           | 723-42-2    |      | 37      | 255 | 3.80  | 3   |
| 896    | Divaplon             | Anxiolytic           | 90808-12-1  |      | 149     | 295 | 4.42  | 5   |
| 897    | Dixanthogen          | Ectoparasiticide     | 502-55-6    |      | 29      | 242 | 3.38  | 2   |
| 898    | Dizocilpine Maleate  | Nootropic            | 77086-21-6  |      | 69      | 221 | 3.00  | 1   |
| 899    | Docarpamine          | Cardiotonic          | 74639-40-0  |      | 97      | 471 | 0.46  | 10  |
| 900    | Docetaxel            | Antineoplastic       | 114977-28-5 |      | 232     | 808 | 2.46  | 15  |
| 901    | Docusate Sodium      | Laxative             | 10041-19-7  |      | 176     | 423 | 4.70  | 7   |
| 902    | Dodeclonium Bromide  | Antibiotic           | 15687-13-5  |      | 122     | 449 |       |     |
| 903    | Dofamium Chloride    | Antihistaminic       | 54063-35-3  |      | 124     | 454 |       |     |
| 904    | Dofetilide           | Antiarrhythmic       | 115256-11-6 | Y    | 154     | 442 | 1.38  | 8   |
| 905    | Domazoline Fumarate  | Anticholelithogenic  | 6043-01-2   |      | 121     | 248 | 2.77  | 4   |
| 906    | Domiphen Bromide     | Antibacterial        | 538-71-6    |      | 113     | 414 |       |     |
| 907    | Domperidone          | Antiemetic           | 57808-66-9  | Y    | 243     | 426 | 4.05  | 7   |
| 908    | Dopamine             | Cardiotonic          | 51-61-6     | Y    | 185     | 153 | 0.05  | 3   |
| 909    | Doqualast            | Antihistaminic       | 64019-03-0  |      | 354     | 240 | 1.26  | 5   |
| 910    | Doramapimod          | Antirheumatic        | 285983-48-4 |      | 144     | 528 | 4.44  | 8   |
| 911    | Doramectin           | Antibacterial        | 117704-25-3 |      | 184     | 899 | 6.06  | 14  |

| Number | Common Name                  | Indication       | CAS Number  | Oral | MP (°C) | MW  | ClogP | HBA |
|--------|------------------------------|------------------|-------------|------|---------|-----|-------|-----|
| 912    | Dorastine                    | Antihistaminic   | 21228-13-7  |      | 115     | 340 | 3.48  | 3   |
| 913    | Dothiepin                    | Antidepressant   | 113-53-1    | Y    | 56      | 295 | 4.27  | 1   |
| 914    | Doxazosin                    | Antihypertensive | 74191-85-8  | Y    | 250     | 451 | 2.85  | 10  |
| 915    | Doxefazepam                  | Sedative         | 40762-15-0  |      | 139     | 349 | 1.41  | 5   |
| 916    | Doxenitoin                   | Anticonvulsant   | 3254-93-1   |      | 184     | 238 | 3.12  | 3   |
| 917    | Doxibetasol                  | Glucocorticoid   | 1879-77-2   |      | 233     | 376 | 2.34  | 4   |
| 918    | Doxifluridine                | Antineoplastic   | 3094-09-5   | Y    | 190     | 246 | -0.72 | 7   |
| 919    | Doxofylline                  | Bronchodilator   | 69975-86-6  | Y    | 145     | 266 | -0.87 | 8   |
| 920    | Doxorubicin                  | Antineoplastic   | 23214-92-8  | Y    | 218     | 544 | 0.24  | 12  |
| 921    | Draflazine                   | Cardiotonic      | 120770-34-5 |      | 213     | 605 | 5.93  | 7   |
| 922    | Drazidox                     | Antibacterial    | 27314-77-8  |      | 215     | 234 | -3.57 | 7   |
| 923    | Droloxifene                  | Antineoplastic   | 82413-20-5  |      | 161     | 388 | 4.85  | 3   |
| 924    | Drometizole                  | Dermatologic     | 2440-22-4   |      | 129     | 225 | 4.31  | 4   |
| 925    | Dromostanolone<br>Propionate | Antineoplastic   | 521-12-0    |      | 128     | 361 | 5.94  | 3   |
| 926    | Droperidol                   | Antipsychotic    | 548-73-2    |      | 145     | 379 | 3.10  | 5   |
| 927    | Dropropizine                 | Antitussive      | 17692-31-8  |      | 107     | 236 | -0.03 | 4   |
| 928    | Drospirenone                 | Contraceptive    | 67392-87-4  | Y    | 201     | 366 | 3.39  | 3   |
| 929    | Drotebanol                   | Antitussive      | 3176-03-2   | Y    | 168     | 333 | 1.25  | 5   |
| 930    | Droxicam                     | Antiinflammatory | 90101-16-9  |      | 263     | 357 | 2.07  | 8   |
| 931    | Droxidopa                    | Antiparkinsonian | 23651-95-8  | Y    | 232     | 213 | -1.86 | 6   |
| 932    | Dutasteride                  | Steroid          | 164656-23-9 | Y    | 250     | 529 | 5.93  | 4   |
| 933    | Dydrogesterone               | Progestogen      | 152-62-5    | Y    | 165     | 312 | 3.55  | 2   |
| 934    | Dyphylline                   | Bronchodilator   | 479-18-5    |      | 157     | 254 | -1.25 | 8   |
| 935    | Ebrotidine                   | Antiulcerative   | 100981-43-9 | Y    | 126     | 477 | 1.85  | 8   |
| 936    | Ebselen                      | Nootropic        | 60940-34-3  | Y    | 181     | 274 |       | 2   |
| 937    | Ecadotril                    | Antihypertensive | 112573-73-6 |      | 71      | 385 | 3.74  | 5   |
| 938    | Echothiophate Iodide         | Cholinergic      | 513-10-0    |      | 131     | 383 |       |     |
| 939    | Econazole                    | Antifungal       | 27220-47-9  | Y    | 126     | 382 | 4.48  | 3   |
| 940    | Ecopladib                    | Analgesic        | 381683-92-7 |      | 125     | 748 | 9.18  | 7   |
| 941    | Ectylurea                    | Sedative         | 95-04-5     |      | 192     | 156 | 0.63  | 4   |
| 942    | Edaravone                    | Nootropic        | 89-25-8     |      | 128     | 174 | 0.73  | 3   |
| 943    | Edetate                      | Antidote         | 60-00-4     |      | 244     | 292 | -0.84 | 10  |
| 944    | Edogestrone                  | Progestogen      | 809-01-8    |      | 188     | 431 | 4.95  | 5   |
| 945    | Edotecarin                   | Antineoplastic   | 174402-32-5 |      | 330     | 609 | 0.35  | 15  |
| 946    | Edoxudine                    | Antiviral        | 15176-29-1  |      | 155     | 256 | -0.33 | 7   |
| 947    | Efaproxiral                  | Antihypertensive | 131179-95-8 |      | 139     | 341 | 2.92  | 5   |
| 948    | Efavirenz                    | Antiviral        | 154598-52-4 | Y    | 140     | 316 | 3.04  | 3   |
| 949    | Efetoazole                   | Antidepressant   | 90408-21-2  |      | 86      | 186 | 1.78  | 2   |
| 950    | Eflornithine                 | Antineoplastic   | 70052-12-9  | Y    | 138     | 182 | 0.09  | 4   |
| 951    | Efloxate                     | Vasodilator      | 119-41-5    |      | 126     | 324 | 4.26  | 5   |
| 952    | Eflumast                     | Antihistaminic   | 70977-46-7  |      | 238     | 265 | 1.67  | 8   |
| 953    | Efonidipine                  | Antihypertensive | 111011-63-3 | Y    | 163     | 632 | 5.78  | 10  |



| Number | Common Name             | Indication          | CAS Number  | Oral | MP (°C) | MW  | ClogP | HBA |
|--------|-------------------------|---------------------|-------------|------|---------|-----|-------|-----|
| 954    | Eglumetad               | Anxiolytic          | 176199-48-7 |      | 271     | 185 | -0.64 | 5   |
| 955    | Elantrine               | Anticholelithogenic | 1232-85-5   |      | 139     | 292 | 4.18  | 2   |
| 956    | Elarofiban              | Anticoagulant       | 198958-88-2 |      | 158     | 417 | -0.11 | 8   |
| 957    | Elinafide               | Antineoplastic      | 162706-37-8 |      | 160     | 521 | 3.50  | 8   |
| 958    | Ellagic Acid            | Hemostatic          | 476-66-4    |      | 360     | 302 | 0.24  | 8   |
| 959    | Elmustine               | Antineoplastic      | 60784-46-5  |      | 56      | 196 | 0.30  | 6   |
| 960    | Elopirazole             | Antipsychotic       | 115464-77-2 |      | 119     | 375 | 4.10  | 4   |
| 961    | Eltanolone              | Anesthetic          | 128-20-1    |      | 148     | 318 | 5.04  | 2   |
| 962    | Emapunil                | Unclassified        | 226954-04-7 |      | 166     | 401 | 3.97  | 7   |
| 963    | Embutramide             | Anesthetic          | 15687-14-6  |      | 130     | 293 | 2.31  | 4   |
| 964    | Emetine                 | Antiamoebic         | 483-18-1    |      | 74      | 481 | 3.82  | 6   |
| 965    | Emitefur                | Antineoplastic      | 110690-43-2 |      | 163     | 558 | 2.90  | 12  |
| 966    | Emivirine               | Antiviral           | 149950-60-7 |      | 110     | 302 | 3.57  | 5   |
| 967    | Emorfazone              | Antiinflammatory    | 38957-41-4  |      | 90      | 239 | 0.18  | 6   |
| 968    | Emylcamate              | Anxiolytic          | 78-28-4     |      | 56      | 145 | 1.59  | 3   |
| 969    | Enalapril               | Antihypertensive    | 75847-73-3  | Y    | 144     | 376 | 3.25  | 7   |
| 970    | Enalaprilat             | Antihypertensive    | 76420-72-9  |      | 153     | 348 | 3.63  | 7   |
| 971    | Enazadrem Phosphate     | Dermatologic        | 107361-33-1 |      | 44      | 299 | 3.93  | 4   |
| 972    | Enclomiphene            | Steroid             | 15690-57-0  | Y    | 74      | 406 | 5.85  | 2   |
| 973    | Endixaprine             | Antineoplastic      | 93181-85-2  |      | 152     | 324 | 2.38  | 4   |
| 974    | Endobenzylamine Bromide | Mydriatic           | 52080-56-5  |      | 170     | 410 |       |     |
| 975    | Endralazine Mesylate    | Antihypertensive    | 39715-02-1  |      | 222     | 269 | -0.27 | 6   |
| 976    | Enestebol               | Androgen            | 2320-86-7   |      | 160     | 316 | 2.88  | 3   |
| 977    | Enfenamic Acid          | Antiinflammatory    | 23049-93-6  |      | 150     | 241 | 3.96  | 3   |
| 978    | Enilconazole            | Antifungal          | 35554-44-0  |      | 51      | 297 | 3.56  | 3   |
| 979    | Enocitabine             | Antineoplastic      | 55726-47-1  |      | 142     | 566 | 8.62  | 9   |
| 980    | Enoxacin                | Antibiotic          | 74011-58-8  | Y    | 223     | 320 | 1.59  | 7   |
| 981    | Enoximone               | Cardiotonic         | 77671-31-9  |      | 257     | 248 | 3.05  | 4   |
| 982    | Enoxolone               | Antiinflammatory    | 471-53-4    |      | 293     | 471 | 5.50  | 4   |
| 983    | Enprofylline            | Bronchodilator      | 41078-02-8  |      | 288     | 194 | 0.31  | 6   |
| 984    | Enpromate               | Antineoplastic      | 10087-89-5  |      | 156     | 333 | 3.92  | 3   |
| 985    | Enrofloxacin            | Antibiotic          | 93106-60-6  |      | 220     | 359 | 2.31  | 6   |
| 986    | Entacapone              | Antiparkinsonian    | 130929-57-6 | Y    | 163     | 305 | 2.12  | 8   |
| 987    | Enviroxime              | Antiviral           | 72301-79-2  |      | 199     | 358 | 3.10  | 7   |
| 988    | Enzastaurin             | Antineoplastic      | 170364-57-5 | Y    | 155     | 516 | 7.88  | 7   |
| 989    | Epalrestat              | Antidiabetic        | 82159-09-9  | Y    | 214     | 319 | 2.90  | 4   |
| 990    | Epanolol                | Antianginal         | 86880-51-5  |      | 119     | 369 | 1.10  | 7   |
| 991    | Eperezolid              | Antibacterial       | 165800-04-4 |      | 174     | 394 | -0.59 | 9   |
| 992    | Ephedrine               | Bronchodilator      | 299-42-3    | Y    | 38      | 165 | 1.08  | 2   |
| 993    | Ephedrine Camphorate    | Antihypotensive     | 124-83-4    |      | 139     | 200 | 1.34  | 4   |
| 994    | Epiestriol              | Steroid             | 547-81-9    |      | 277     | 288 | 2.53  | 3   |
| 995    | Epimestrol              | Pituitary           | 7004-98-0   |      | 159     | 302 | 3.36  | 3   |
| 996    | Epinastine              | Antihistaminic      | 80012-43-7  | Y    | 207     | 249 | 3.51  | 3   |

| Number | Common Name                    | Indication       | CAS Number  | Oral | MP (°C) | MW  | ClogP | HBA |
|--------|--------------------------------|------------------|-------------|------|---------|-----|-------|-----|
| 997    | Epinephrine                    | Bronchodilator   | 51-43-4     |      | 209     | 183 | -0.54 | 4   |
| 998    | Epirizole                      | Analgesic        | 18694-40-1  |      | 91      | 234 | 1.26  | 6   |
| 999    | Epitettracycline               | Antibacterial    | 79-85-6     |      | 174     | 444 | 0.62  | 10  |
| 1000   | Epithiazide                    | Antihypertensive | 1764-85-8   |      | 207     | 426 | 0.71  | 7   |
| 1001   | Epitiostanol                   | Antineoplastic   | 2363-58-8   |      | 128     | 307 | 5.32  | 1   |
| 1002   | Eplerenone                     | Antihypertensive | 107724-20-9 | Y    | 243     | 414 | 0.32  | 6   |
| 1003   | Epostane                       | Oxytocic         | 80471-63-2  |      | 193     | 357 | 3.76  | 4   |
| 1004   | Epristeride                    | Steroid          | 119169-78-7 |      | 246     | 400 | 5.71  | 4   |
| 1005   | Eprodinate Disodium            | Nootropic        | 21668-77-9  | Y    | 123     | 204 | -4.10 | 6   |
| 1006   | Eprosartan                     | Antihypertensive | 133040-01-4 | Y    | 261     | 425 | 2.96  | 6   |
| 1007   | Epsiprantel                    | Anthelmintic     | 98123-83-2  |      | 188     | 326 | 3.04  | 4   |
| 1008   | Eptastigmine                   | Cholinergic      | 101246-68-8 |      | 61      | 360 | 4.33  | 5   |
| 1009   | Equilin                        | Estrogen         | 474-86-2    |      | 237     | 268 | 2.72  | 2   |
| 1010   | Erdosteine                     | Mucolytic        | 84611-23-4  | Y    | 157     | 249 | 0.48  | 5   |
| 1011   | Ergonovine                     | Antihypertensive | 60-79-7     | Y    | 162     | 325 | 2.48  | 5   |
| 1012   | Ergotamine                     | Analgesic        | 113-15-5    |      | 214     | 582 | 7.37  | 10  |
| 1013   | Erlotinib                      | Antineoplastic   | 183321-74-6 | Y    | 155     | 393 | 3.03  | 7   |
| 1014   | Erythryl Tetranitrate          | Vasodilator      | 7297-25-8   |      | 61      | 302 | 2.83  | 16  |
| 1015   | Erythromycin                   | Antibiotic       | 114-07-8    | Y    | 138     | 734 | 1.91  | 14  |
| 1016   | Erythromycin<br>Ethylsuccinate | Antibiotic       | 1264-62-6   | Y    | 110     | 862 | 2.72  | 17  |
| 1017   | Erythromycin Propionate        | Antibiotic       | 134-36-1    |      | 125     | 790 | 2.74  | 15  |
| 1018   | Esaprazole                     | Antiulcerative   | 64204-55-3  |      | 112     | 225 | 0.49  | 4   |
| 1019   | Esculin                        | Dermatologic     | 531-75-9    |      | 204     | 340 | -1.31 | 9   |
| 1020   | Eseridine                      | Cholinergic      | 25573-43-7  |      | 128     | 291 | 1.59  | 6   |
| 1021   | Esflurbiprofen                 | Antiinflammatory | 51543-39-6  |      | 116     | 244 | 3.66  | 2   |
| 1022   | Esmolol                        | Antiarrhythmic   | 81147-92-4  |      | 49      | 295 | 1.92  | 5   |
| 1023   | Esonarimod                     | Antiarrhythmic   | 101973-77-7 |      | 96      | 280 | 2.35  | 4   |
| 1024   | Estazolam                      | Sedative         | 29975-16-4  | Y    | 227     | 295 | 2.52  | 4   |
| 1025   | Estradiol                      | Estrogen         | 50-28-2     | Y    | 176     | 272 | 4.15  | 2   |
| 1026   | Estradiol 17 Propionate        | Estrogen         | 3758-34-7   | Y    | 200     | 328 | 5.62  | 3   |
| 1027   | Estradiol Acetate              | Estrogen         | 4245-41-4   |      | 137     | 314 | 4.46  | 3   |
| 1028   | Estradiol Benzoate             | Estrogen         | 50-50-0     |      | 195     | 376 | 5.10  | 3   |
| 1029   | Estradiol Cypionate            | Estrogen         | 313-06-4    |      | 150     | 397 | 7.58  | 3   |
| 1030   | Estradiol Dipropionate         | Estrogen         | 113-38-2    |      | 104     | 385 | 6.45  | 4   |
| 1031   | Estradiol Enanthate            | Estrogen         | 4956-37-0   |      | 95      | 385 | 7.66  | 3   |
| 1032   | Estradiol Valerate             | Estrogen         | 979-32-8    | Y    | 145     | 356 | 6.64  | 3   |
| 1033   | Estramustine                   | Antineoplastic   | 2998-57-4   | Y    | 105     | 440 | 5.75  | 4   |
| 1034   | Estramustine Phosphate         | Antineoplastic   | 4891-15-0   |      | 155     | 520 | 3.86  | 7   |
| 1035   | Estrapronicate                 | Estrogen         | 4140-20-9   |      | 123     | 434 | 6.45  | 5   |
| 1036   | Estrazinol Hydrobromide        | Estrogen         | 5941-36-6   |      | 133     | 311 | 2.66  | 3   |
| 1037   | Estriol                        | Estrogen         | 50-27-1     | Y    | 278     | 288 | 2.53  | 3   |
| 1038   | Estrone                        | Estrogen         | 53-16-7     |      | 257     | 270 | 3.62  | 2   |

| Number | Common Name                   | Indication                  | CAS Number  | Oral | MP (°C) | MW  | ClogP | HBA |
|--------|-------------------------------|-----------------------------|-------------|------|---------|-----|-------|-----|
| 1039   | Estrone Sodium Sulfate        | Estrogen                    | 481-97-0    | Y    | 210     | 350 | 2.81  | 5   |
| 1040   | Etafedrine                    | Adrenergic                  | 7681-79-0   |      | 29      | 193 | 2.13  | 2   |
| 1041   | Etalocib                      | Antineoplastic              | 161172-51-6 |      | 69      | 545 | 8.93  | 6   |
| 1042   | Etaminile                     | Antitussive                 | 15599-27-6  |      | 133     | 230 | 2.58  | 2   |
| 1043   | Etamiphyllin                  | Bronchodilator              | 314-35-2    |      | 75      | 279 | 0.57  | 7   |
| 1044   | Etaqualone                    | Sedative                    | 7432-25-9   |      | 79      | 264 | 3.01  | 3   |
| 1045   | Etazepine                     | Anticonvulsant              | 88124-27-0  |      | 99      | 267 | 2.33  | 3   |
| 1046   | Etebenecid                    | Uricosuric                  | 1213-06-5   |      | 193     | 257 | 1.50  | 5   |
| 1047   | Eterobarb                     | Anticonvulsant              | 27511-99-5  |      | 117     | 320 | 0.44  | 7   |
| 1048   | Etersalate                    | Analgesic                   | 62992-61-4  |      | 140     | 357 | 2.15  | 7   |
| 1049   | Ethacrynic Acid               | Diuretic                    | 58-54-8     | Y    | 119     | 303 | 2.84  | 4   |
| 1050   | Ethambutol                    | Antibacterial               | 74-55-5     | Y    | 88      | 204 | -0.29 | 4   |
| 1051   | Ethamivan                     | Nootropic                   | 304-84-7    |      | 97      | 223 | 1.60  | 4   |
| 1052   | 1,2-Ethanedisulfonic Acid     | Sedative                    | 110-04-3    | Y    | 125     | 190 | -4.40 | 6   |
| 1053   | Ethanolamine<br>Hydrofluoride | Dermatologic                | 111-42-2    |      | 28      | 105 | -1.76 | 3   |
| 1054   | Ethaverine                    | Antispasmodic               | 486-47-5    |      | 97      | 395 | 4.97  | 5   |
| 1055   | Ethenzamide                   | Analgesic                   | 938-73-8    |      | 131     | 165 | 0.96  | 3   |
| 1056   | Ethiazide                     | Diuretic                    | 1824-58-4   | Y    | 270     | 326 | 0.78  |     |
| 1057   | Ethinamate                    | Sedative                    | 126-52-3    | Y    | 96      | 167 | 1.53  |     |
| 1058   | Ethinyl Estradiol             | Estrogen                    | 57-63-6     | Y    | 146     | 296 | 4.11  | 7   |
| 1059   | Ethionamide                   | Antibacterial               | 536-33-4    | Y    | 166     | 166 | 1.17  | 2   |
| 1060   | Ethisterone                   | Progestogen                 | 434-03-7    |      | 271     | 312 | 3.14  | 2   |
| 1061   | Ethomoxane                    | Sedative                    | 3570-46-5   |      | 197     | 265 | 3.13  | 4   |
| 1062   | Ethopabate                    | Antibacterial               | 59-06-3     |      | 149     | 237 | 1.54  | 5   |
| 1063   | Ethopropazine                 | Antiparkinsonian            | 522-00-9    |      | 55      | 312 | 5.91  | 2   |
| 1064   | Ethosuximide                  | Anticonvulsant              | 77-67-8     | Y    | 55      | 141 | 0.25  | 3   |
| 1065   | Ethotoin                      | Anticonvulsant              | 86-35-1     | Y    | 94      | 204 | 1.06  | 4   |
| 1066   | Ethoxazene                    | Analgesic                   | 94-10-0     |      | 117     | 256 | 3.04  | 5   |
| 1067   | Ethoxzolamide                 | Diuretic                    | 452-35-7    | Y    | 189     | 258 | 2.14  | 5   |
| 1068   | Ethyl Biscoumacetate          | Anticoagulant               | 548-00-5    |      | 154     | 408 | 1.61  | 8   |
| 1069   | Ethyl Dibunate                | Antitussive                 | 5560-69-0   |      | 139     | 349 | 6.00  | 3   |
| 1070   | Ethyl Loflazepate             | Anxiolytic                  | 29177-84-2  | Y    | 194     | 361 | 2.95  | 5   |
| 1071   | Ethylamine                    | Dermatologic                | 75-04-7     |      | 120     | 45  | 0.04  | 1   |
| 1072   | Ethylenediamine               | Urologic                    | 107-15-3    | Y    | 61      | 60  | -2.06 | 2   |
| 1073   | Ethylestrenol                 | Steroid                     | 965-90-2    |      | 77      | 288 | 6.52  | 1   |
| 1074   | Ethylmorphine Methiodide      | Analgesic                   | 6696-59-9   |      | 240     | 455 |       |     |
| 1075   | Ethylnorepinephrine           | Bronchodilator              | 536-24-3    |      | 196     | 197 | -0.40 | 4   |
| 1076   | Ethynodiol Diacetate          | Anesthetic                  | 297-76-7    |      | 144     | 385 | 5.45  | 4   |
| 1077   | Ethypicone                    | Unclassified                | 467-90-3    |      | 138     | 181 | 1.89  | 3   |
| 1078   | Eticyclidine                  | Antiparkinsonian            | 2201-15-2   |      | 103     | 203 | 3.65  | 1   |
| 1079   | Etidronate                    | Bone Resorption<br>Inhibito | 2809-21-4   | Y    | 103     | 206 | -0.75 | 7   |

| Number | Common Name         | Indication         | CAS Number  | Oral | MP (°C) | MW  | ClogP | HBA |
|--------|---------------------|--------------------|-------------|------|---------|-----|-------|-----|
| 1080   | Etifoxine           | Anxiolytic         | 21715-46-8  |      | 91      | 301 | 4.23  | 3   |
| 1081   | Etilefrine          | Antihypertensive   | 709-55-7    |      | 145     | 181 | 0.63  | 3   |
| 1082   | Etipirium Iodide    | Unclassified       | 3478-15-7   |      | 148     | 467 |       |     |
| 1083   | Etracetam           | Anticonvulsant     | 33996-58-6  |      | 114     | 170 | -0.88 | 4   |
| 1084   | Etiroxate           | Nootropic          | 17365-01-4  |      | 216     | 819 | 6.63  | 5   |
| 1085   | Etisazole           | Antifungal         | 7716-60-1   |      | 78      | 178 | 3.08  | 2   |
| 1086   | Etizolam            | Anxiolytic         | 40054-69-1  | Y    | 146     | 343 | 2.20  | 4   |
| 1087   | Etocarlide          | Antibiotic         | 1234-30-6   |      | 170     | 316 | 3.05  | 4   |
| 1088   | Etocrylene          | Dermatologic       | 5232-99-5   |      | 98      | 277 | 3.99  | 3   |
| 1089   | Etodolac            | Antiinflammatory   | 41340-25-4  | Y    | 147     | 287 | 3.42  | 4   |
| 1090   | Etofenprox          | Antiinflammatory   | 80844-07-1  |      | 36      | 376 | 6.88  | 3   |
| 1091   | Etofibrate          | Antihyperlipidemic | 31637-97-5  | Y    | 100     | 364 | 3.80  | 6   |
| 1092   | Etofylline          | Bronchodilator     | 519-37-9    |      | 161     | 224 | -0.91 | 7   |
| 1093   | Etoloxamine         | Antihistaminic     | 1157-87-5   |      | 128     | 283 | 4.48  | 2   |
| 1094   | Etomidate           | Sedative           | 33125-97-2  |      | 67      | 244 | 3.05  | 4   |
| 1095   | Etomidoline         | Antispasmodic      | 21590-92-1  |      | 107     | 380 | 2.69  | 5   |
| 1096   | Etoposide           | Antineoplastic     | 33419-42-0  |      | 244     | 589 | 0.28  | 13  |
| 1097   | Etoprindole         | Nootropic          | 54063-37-5  |      | 145     | 259 | 3.87  | 4   |
| 1098   | Etoprine            | Antineoplastic     | 18588-57-3  |      | 231     | 283 | 3.28  | 4   |
| 1099   | Etorphine           | Analgesic          | 14521-96-1  |      | 216     | 412 | 2.56  | 5   |
| 1100   | Etosalamide         | Antifungal         | 15302-15-5  |      | 78      | 209 | 0.66  | 4   |
| 1101   | Etozolin            | Diuretic           | 73-09-6     | Y    | 140     | 284 | 2.75  | 5   |
| 1102   | Etravirine          | Antiviral          | 269055-15-4 | Y    | 260     | 435 | 3.88  | 7   |
| 1103   | Etretinate          | Dermatologic       | 54350-48-0  |      | 105     | 354 | 7.15  | 3   |
| 1104   | Etryptamine Acetate | Nootropic          | 2235-90-7   |      | 101     | 188 | 2.41  | 2   |
| 1105   | Eucaïne             | Analgesic          | 500-34-5    |      | 71      | 247 | 3.64  | 3   |
| 1106   | Eucatropine         | Mydriatic          | 100-91-4    |      | 112     | 291 | 2.16  | 4   |
| 1107   | Euprocín            | Anesthetic         | 1301-42-4   |      | 152     | 383 | 5.12  | 4   |
| 1108   | Exalamide           | Antifungal         | 53370-90-4  |      | 71      | 221 | 3.00  | 3   |
| 1109   | Exemestane          | Antineoplastic     | 107868-30-4 | Y    | 197     | 296 | 2.43  | 2   |
| 1110   | Exifone             | Nootropic          | 52479-85-3  |      | 272     | 278 | -1.48 | 7   |
| 1111   | Exisulind           | Antineoplastic     | 59973-80-7  |      | 197     | 372 | 3.12  | 4   |
| 1112   | Ezetimibe           | Antihyperlipidemic | 163222-33-1 | Y    | 165     | 409 | 3.96  | 4   |
| 1113   | Fadrozole           | Antineoplastic     | 102676-47-1 | Y    | 118     | 223 | 1.48  | 3   |
| 1114   | Famciclovir         | Antiviral          | 104227-87-4 | Y    | 103     | 321 | -0.12 | 9   |
| 1115   | Famotidine          | Antiulcerative     | 76824-35-6  | Y    | 163     | 337 | -1.66 | 9   |
| 1116   | Fampridine          | Nootropic          | 504-24-5    | Y    | 158     | 94  | 0.34  | 2   |
| 1117   | Famprofazone        | Analgesic          | 22881-35-2  |      | 133     | 378 | 3.56  | 4   |
| 1118   | Fananserín          | Antipsychotic      | 127625-29-0 |      | 96      | 426 | 4.01  | 5   |
| 1119   | Fanetizole Mesylate | Immunomodulator    | 79069-94-6  |      | 116     | 280 | 5.54  | 2   |
| 1120   | Fantofarone         | Antihypertensive   | 114432-13-2 |      | 83      | 551 | 5.06  | 7   |
| 1121   | Farglitazar         | Antidiabetic       | 196808-45-4 |      | 149     | 547 | 5.46  | 7   |
| 1122   | Fasidotril          | Antihypertensive   | 135038-57-2 |      | 104     | 444 | 3.94  | 7   |

| Number | Common Name           | Indication                    | CAS Number  | Oral | MP (°C) | MW  | ClogP | HBA |
|--------|-----------------------|-------------------------------|-------------|------|---------|-----|-------|-----|
| 1123   | Fasiplon              | Anxiolytic                    | 106100-65-6 |      | 177     | 273 | 2.42  | 7   |
| 1124   | Fazadinium Bromide    | Muscle Relaxant<br>(Skeletal) | 49564-56-9  |      | 218     | 604 |       |     |
| 1125   | Fazarabine            | Antineoplastic                | 65886-71-7  |      | 220     | 244 | -2.19 | 9   |
| 1126   | Febantel              | Anthelmintic                  | 58306-30-2  |      | 124     | 446 | 1.82  | 10  |
| 1127   | Febuverine            | Anesthetic                    | 7077-33-0   |      | 210     | 467 | 5.03  | 6   |
| 1128   | Febuxostat            | Antiurolithic                 | 144060-53-7 | y    | 238     | 316 | 4.00  | 5   |
| 1129   | Felbamate             | Anticonvulsant                | 25451-15-4  | Y    | 151     | 238 | 0.73  | 6   |
| 1130   | Felbinac              | Antiinflammatory              | 5728-52-9   |      | 162     | 212 | 3.26  | 2   |
| 1131   | Felipyrine            | Antiinflammatory              | 1980-49-0   |      | 84      | 244 | 1.89  | 3   |
| 1132   | Felodipine            | Antihypertensive              | 72509-76-3  | Y    | 142     | 384 | 4.76  | 5   |
| 1133   | Fenacetinol           | Unclassified                  | 22521-79-5  |      | 151     | 195 | 0.90  | 4   |
| 1134   | Fenaclon              | Antipsychotic                 | 306-20-7    |      | 57      | 212 | 1.85  | 2   |
| 1135   | Fenadiazole           | Sedative                      | 1008-65-7   |      | 111     | 162 | 0.67  | 4   |
| 1136   | Fenamifuril           | Unclassified                  | 735-64-8    |      | 104     | 279 | 0.36  | 6   |
| 1137   | Fenamole              | Antiinflammatory              | 5467-78-7   |      | 161     | 161 | 0.70  | 5   |
| 1138   | Fenbendazole          | Anthelmintic                  | 43210-67-9  |      | 266     | 299 | 2.36  | 5   |
| 1139   | Fenbenicillin         | Antibiotic                    | 1926-48-3   |      | 92      | 426 |       | 7   |
| 1140   | Fenbufen              | Antiinflammatory              | 36330-85-5  | Y    | 181     | 254 | 3.12  | 3   |
| 1141   | Fenbutrazate          | Anorexic                      | 4378-36-3   |      | 238     | 367 | 4.26  | 4   |
| 1142   | Fencamfamin           | Nootropic                     | 1209-98-9   |      | 151     | 215 | 3.75  | 1   |
| 1143   | Fencibutirol          | Choleretic                    | 5977-10-6   |      | 117     | 262 | 2.76  | 3   |
| 1144   | Fenclofenac           | Antiinflammatory              | 34645-84-6  |      | 122     | 297 | 4.59  | 3   |
| 1145   | Fenclonine            | Antidepressant                | 7424-00-2   |      | 244     | 200 | 0.82  | 3   |
| 1146   | Fenclozic Acid        | Antiinflammatory              | 17969-20-9  |      | 148     | 254 | 3.11  | 3   |
| 1147   | Fendizoate            | Antipsychotic                 | 84627-04-3  |      | 263     | 318 | 3.86  | 4   |
| 1148   | Fendosal              | Antiinflammatory              | 53597-27-6  |      | 224     | 381 | 5.04  | 4   |
| 1149   | Feneritrol            | Antihypertensive              | 15301-67-4  |      | 63      | 721 | 10.46 | 8   |
| 1150   | Fenfluramine          | Anorexic                      | 458-24-2    |      | 166     | 231 | 3.55  | 1   |
| 1151   | Fenimide              | Antipsychotic                 | 60-45-7     |      | 91      | 217 | 2.09  | 3   |
| 1152   | Fenirofibrate         | Antihyperlipidemic            | 54419-31-7  |      | 130     | 321 | 2.88  | 4   |
| 1153   | Fenleuton             | Antiinflammatory              | 141579-54-6 |      | 140     | 314 | 4.96  | 5   |
| 1154   | Fenofibrate           | Antihyperlipidemic            | 49562-28-9  | Y    | 80      | 361 | 5.80  | 4   |
| 1155   | Fenoterol             | Bronchodilator                | 13392-18-2  |      | 181     | 303 | 1.33  | 5   |
| 1156   | Fenoverine            | Antispasmodic                 | 37561-27-6  |      | 142     | 460 | 4.83  | 6   |
| 1157   | Fenozolone            | Nootropic                     | 15302-16-6  |      | 148     | 204 | 1.30  | 4   |
| 1158   | Fenpentadiol          | Antidepressant                | 15687-18-0  |      | 77      | 229 | 2.38  | 2   |
| 1159   | Fenpipramide          | Antispasmodic                 | 77-01-0     |      | 183     | 322 | 3.31  | 3   |
| 1160   | Fenpiprane            | Antispasmodic                 | 3540-95-2   |      | 41      | 279 | 4.62  | 1   |
| 1161   | Fenpiverinium Bromide | Antispasmodic                 | 258329-46-3 |      | 178     | 417 |       |     |
| 1162   | Fenprinast            | Bronchodilator                | 75184-94-0  |      | 223     | 330 | 2.51  | 6   |
| 1163   | Fenretinide           | Antineoplastic                | 65646-68-6  |      | 172     | 392 | 5.88  | 3   |
| 1164   | Fentanyl              | Analgesic                     | 437-38-7    |      | 85      | 336 | 3.68  | 3   |

| Number | Common Name             | Indication       | CAS Number  | Oral | MP (°C) | MW  | ClogP | HBA |
|--------|-------------------------|------------------|-------------|------|---------|-----|-------|-----|
| 1165   | Fentiazac               | Antiinflammatory | 18046-21-4  |      | 162     | 330 | 5.05  | 3   |
| 1166   | Fenticlor               | Antibacterial    | 97-24-5     |      | 174     | 287 | 3.65  | 2   |
| 1167   | Fentonium Bromide       | Antibiotic       | 34786-74-8  |      | 199     | 565 |       |     |
| 1168   | Fepradinol              | Antiinflammatory | 36981-91-6  |      | 141     | 209 | 0.79  | 3   |
| 1169   | Feprazone               | Antiinflammatory | 30748-29-9  |      | 156     | 320 | 3.05  | 4   |
| 1170   | Ferric Cacodylate       | Anthelmintic     | 75-60-5     |      | 195     | 138 | -0.99 | 2   |
| 1171   | Fexofenadine            | Antihistaminic   | 83799-24-0  | Y    | 143     | 502 | 3.73  | 5   |
| 1172   | Fialuridine             | Antiviral        | 69123-98-4  |      | 221     | 372 | 0.12  | 7   |
| 1173   | Filipin                 | Antifungal       | 480-49-9    |      | 172     | 655 | -0.05 | 11  |
| 1174   | Finasteride             | Urologic         | 98319-26-7  | Y    | 254     | 373 | 3.83  | 4   |
| 1175   | Fingolimod              | Immunomodulator  | 162359-55-9 | Y    | 123     | 307 | 4.18  | 3   |
| 1176   | Firocoxib               | Antiinflammatory | 189954-96-9 |      | 78      | 336 | 0.54  | 5   |
| 1177   | Flamenol                | Antiarrhythmic   | 2174-64-3   |      | 78      | 140 | 1.39  | 3   |
| 1178   | Flavodilol Maleate      | Antihypertensive | 79619-31-1  |      | 146     | 353 | 3.78  | 5   |
| 1179   | Flavoxate               | Antispasmodic    | 15301-69-6  | Y    | 88      | 391 | 4.27  | 5   |
| 1180   | Flazalone               | Antiinflammatory | 21221-18-1  |      | 149     | 331 | 2.64  | 3   |
| 1181   | Flecainide Acetate      | Antiarrhythmic   | 54143-55-4  | Y    | 149     | 414 | 3.19  | 5   |
| 1182   | Fleroxacin              | Antibiotic       | 79660-72-3  |      | 270     | 369 | 1.84  | 6   |
| 1183   | Flestolol Sulfate       | Antihypertensive | 87721-62-8  |      | 60      | 327 | 0.91  | 7   |
| 1184   | Floctafenine            | Analgesic        | 23779-99-9  |      | 180     | 406 | 3.12  | 6   |
| 1185   | Flomoxef                | Antibiotic       | 99665-00-6  |      | 85      | 496 | -2.43 | 13  |
| 1186   | Flopropione             | Antispasmodic    | 2295-58-1   |      | 166     | 182 | 1.98  | 4   |
| 1187   | Florantyrone            | Choleretic       | 519-95-9    |      | 202     | 302 | 4.04  | 3   |
| 1188   | Florfenicol             | Antibiotic       | 73231-34-2  |      | 152     | 358 | 1.18  | 5   |
| 1189   | Flosequinan             | Antihypertensive | 76568-02-0  |      | 227     | 239 | -1.43 | 3   |
| 1190   | Flosulide               | Antiinflammatory | 80937-31-1  |      | 156     | 353 | 2.05  | 5   |
| 1191   | Floxuridine             | Antiviral        | 50-91-9     | Y    | 149     | 246 | -1.41 | 7   |
| 1192   | Fluanisone              | Antipsychotic    | 1480-19-9   |      | 68      | 356 | 3.42  | 4   |
| 1193   | Fluazacort              | Antiinflammatory | 19888-56-3  |      | 254     | 460 | 1.91  | 7   |
| 1194   | Flubanilate             | Nootropic        | 847-20-1    |      | 157     | 304 | 2.11  | 4   |
| 1195   | Flubendazole            | Anthelmintic     | 31430-15-6  | Y    | 260     | 313 | 3.08  | 6   |
| 1196   | Flucarbriil             | Analgesic        | 2261-94-1   |      | 88      | 227 | 2.08  | 2   |
| 1197   | Flucindole              | Antipsychotic    | 40594-09-0  |      | 182     | 250 | 3.10  | 2   |
| 1198   | Fluconazole             | Antifungal       | 86386-73-4  | Y    | 138     | 306 | 0.45  | 7   |
| 1199   | Flucytosine             | Antifungal       | 2022-85-7   | Y    | 296     | 129 | -1.40 | 4   |
| 1200   | Fludarabine             | Antineoplastic   | 21679-14-1  | Y    | 261     | 285 | -0.80 | 9   |
| 1201   | Fludiazepam             | Anxiolytic       | 3900-31-0   |      | 88      | 303 | 2.62  | 3   |
| 1202   | Fludrocortisone         | Steroid          | 127-31-1    | Y    | 260     | 380 | 2.10  | 5   |
| 1203   | Fludrocortisone Acetate | Steroid          | 514-36-3    | Y    | 227     | 422 | 2.72  | 6   |
| 1204   | Flufenamic Acid         | Antiinflammatory | 530-78-9    |      | 132     | 281 | 5.22  | 3   |
| 1205   | Flufenisal              | Analgesic        | 22494-27-5  |      | 136     | 274 | 3.08  | 4   |
| 1206   | Fluindarol              | Vasodilator      | 6723-40-6   |      | 181     | 290 | 4.00  | 2   |
| 1207   | Fluidione               | Anticonvulsant   | 957-56-2    |      | 119     | 240 | 3.42  | 2   |

| Number | Common Name                                     | Indication                    | CAS Number | Oral | MP (°C) | MW  | ClogP | HBA |
|--------|-------------------------------------------------|-------------------------------|------------|------|---------|-----|-------|-----|
| 1208   | Flumazenil                                      | Antidote                      | 78755-81-4 |      | 201     | 303 | 2.15  | 6   |
| 1209   | Flumequine                                      | Antibacterial                 | 42835-25-6 |      | 254     | 261 | 0.88  | 4   |
| 1210   | Flumethasone                                    | Glucocorticoid                | 2135-17-3  |      | 203     | 410 | 1.84  | 5   |
| 1211   | Flumethiazide                                   | Ophthalmic                    | 148-56-1   |      | 301     | 329 | -0.05 | 7   |
| 1212   | Flumetramide                                    | Muscle Relaxant<br>(Skeletal) | 7125-73-7  |      | 116     | 245 | 1.94  | 3   |
| 1213   | Flumezapine                                     | Antipsychotic                 | 61325-80-2 |      | 169     | 330 | 3.50  | 4   |
| 1214   | Flunidazole                                     | Antiprotozoal                 | 4548-15-6  |      | 165     | 251 | 1.33  | 6   |
| 1215   | Flunisolide                                     | Glucocorticoid                | 3385-03-3  |      | 237     | 435 | 2.04  | 6   |
| 1216   | Flunisolide Acetate                             | Antiinflammatory              | 4533-89-5  |      | 266     | 477 | 2.31  | 7   |
| 1217   | Flunitrazepam                                   | Sedative                      | 1622-62-4  | Y    | 169     | 313 | 2.13  | 6   |
| 1218   | Flunixin                                        | Antiinflammatory              | 38677-85-9 |      | 227     | 296 | 4.73  | 4   |
| 1219   | Flunoxaprofen                                   | Antiinflammatory              | 66934-18-7 |      | 163     | 285 | 3.18  | 4   |
| 1220   | Fluocinolone Acetonide                          | Antiinflammatory              | 67-73-2    |      | 266     | 452 | 2.23  | 6   |
| 1221   | Fluocinonide                                    | Antiinflammatory              | 356-12-7   |      | 310     | 495 | 2.51  | 7   |
| 1222   | Fluocortin Butyl                                | Antiinflammatory              | 41767-29-7 |      | 193     | 447 | 3.34  | 5   |
| 1223   | Fluocortolone                                   | Glucocorticoid                | 152-97-6   |      | 189     | 376 | 1.83  | 4   |
| 1224   | Fluocortolone Caproate                          | Glucocorticoid                | 303-40-2   |      | 244     | 475 | 4.23  | 5   |
| 1225   | Fluoresone                                      | Anticonvulsant                | 2924-67-6  |      | 41      | 188 | 1.55  | 2   |
| 1226   | Fluorometholone<br>(Fluorometholone<br>Acetate) | Glucocorticoid                | 426-13-1   |      | 298     | 376 | 2.34  | 4   |
| 1227   | Fluorouracil                                    | Antineoplastic                | 51-21-8    |      | 283     | 130 | -0.65 | 4   |
| 1228   | Fluoxetine                                      | Antidepressant                | 54910-89-3 | Y    | 158     | 309 | 3.93  | 2   |
| 1229   | Fluoxymesterone                                 | Androgen                      | 76-43-7    |      | 274     | 336 | 2.27  | 3   |
| 1230   | Fluperolone Acetate                             | Glucocorticoid                | 2119-75-7  |      | 250     | 435 | 2.47  | 6   |
| 1231   | Fluphenazine Decanoate                          | Antipsychotic                 | 5002-47-1  |      | 31      | 592 | 8.81  | 5   |
| 1232   | Flupirtine                                      | Analgesic                     | 56995-20-1 | Y    | 116     | 304 | 1.60  | 6   |
| 1233   | Flupranone                                      | Analgesic                     | 21686-10-2 |      | 148     | 357 | -0.55 | 5   |
| 1234   | Fluprednidene                                   | Analgesic                     | 2193-87-5  |      | 247     | 390 | 1.59  | 5   |
| 1235   | Fluprednisolone                                 | Glucocorticoid                | 53-34-9    | Y    | 208     | 378 | 1.11  | 5   |
| 1236   | Fluproquazone                                   | Analgesic                     | 40507-23-1 |      | 173     | 296 | 3.08  | 3   |
| 1237   | Fluquazone                                      | Antiinflammatory              | 37554-40-8 |      | 186     | 339 | 3.63  | 3   |
| 1238   | Flurandrenolide                                 | Glucocorticoid                | 1524-88-5  |      | 251     | 437 | 2.31  | 6   |
| 1239   | Flurazepam                                      | Anticonvulsant                | 17617-23-1 | Y    | 80      | 388 | 4.84  | 4   |
| 1240   | Flurbiprofen                                    | Antiinflammatory              | 5104-49-4  | Y    | 113     | 244 | 3.66  | 2   |
| 1241   | Flurogestone Acetate                            | Progestogen                   | 2529-45-5  |      | 263     | 406 | 2.82  | 5   |
| 1242   | Fluspirilene                                    | Antipsychotic                 | 1841-19-6  | Y    | 191     | 476 | 5.50  | 4   |
| 1243   | Flutamide                                       | Antineoplastic                | 13311-84-7 | Y    | 111     | 276 | 3.52  | 5   |
| 1244   | Flutazolam                                      | Anxiolytic                    | 27060-91-9 |      | 145     | 377 | -0.78 | 5   |
| 1245   | Flutemazepam                                    | Anxiolytic                    | 52391-89-6 |      | 163     | 319 | 2.01  | 4   |
| 1246   | Flutiazin                                       | Antiinflammatory              | 7220-56-6  |      | 249     | 311 | 4.12  | 3   |
| 1247   | Fluticasone Propionate                          | Glucocorticoid                | 80474-14-2 |      | 270     | 501 | 3.06  | 5   |

| Number | Common Name                          | Indication           | CAS Number  | Oral | MP (°C) | MW  | ClogP | HBA |
|--------|--------------------------------------|----------------------|-------------|------|---------|-----|-------|-----|
| 1248   | Flutoprazepam                        | Anxiolytic           | 25967-29-7  |      | 120     | 343 | 3.52  | 3   |
| 1249   | Flutrimazole                         | Antifungal           | 119006-77-8 |      | 164     | 346 | 4.39  | 2   |
| 1250   | Flutropium Bromide                   | Bronchodilator       | 63516-07-4  |      | 196     | 478 |       |     |
| 1251   | Fluvastatin                          | Antihyperlipidemic   | 93957-54-1  | Y    | 195     | 411 | 4.57  | 5   |
| 1252   | Fluvoxamine                          | Antidepressant       | 54739-18-3  | Y    | 120     | 318 | 3.71  | 4   |
| 1253   | Folescutol                           | Capillary Protectant | 15687-22-6  |      | 232     | 277 | -0.26 | 6   |
| 1254   | Fominoben                            | Antitussive          | 18053-31-1  |      | 123     | 402 | 2.73  | 6   |
| 1255   | Fomocaine                            | Anesthetic           | 17692-39-6  |      | 53      | 311 | 3.27  | 3   |
| 1256   | Formebolone                          | Steroid              | 2454-11-7   |      | 211     | 344 | 1.19  | 4   |
| 1257   | Formestane                           | Antineoplastic       | 566-48-3    |      | 203     | 302 | 1.79  | 3   |
| 1258   | Formetorex                           | Anorexic             | 22148-75-0  |      | 50      | 163 | 0.38  | 2   |
| 1259   | Forminitrazole                       | Unclassified         | 500-08-3    |      | 193     | 173 | 0.68  | 6   |
| 1260   | Formocortal                          | Glucocorticoid       | 2825-60-7   |      | 181     | 569 | 4.80  | 8   |
| 1261   | Foscolic Acid                        | Unclassified         | 2398-95-0   |      | 149     | 242 | 1.79  | 8   |
| 1262   | Fosenazide                           | Unclassified         | 16543-10-5  |      | 162     | 274 | 0.69  | 4   |
| 1263   | Fosfomicin                           | Antibiotic           | 23155-02-4  | Y    | 94      | 138 | -1.23 | 4   |
| 1264   | Fosfonet Sodium                      | Antiviral            | 4408-78-0   |      | 137     | 140 | -1.37 | 5   |
| 1265   | Fosfosal                             | Analgesic            | 6064-83-1   |      | 169     | 218 | -0.21 | 6   |
| 1266   | Fluoresone                           | Antihypertensive     | 95399-71-6  |      | 151     | 435 | 4.41  | 6   |
| 1267   | Fospirate                            | Anthelmintic         | 5598-52-7   |      | 87      | 306 | 2.61  | 5   |
| 1268   | Fostedil                             | Vasodilator          | 75889-62-2  |      | 96      | 361 | 3.55  | 4   |
| 1269   | Fotemustine                          | Antineoplastic       | 92118-27-9  |      | 85      | 316 | 1.37  | 8   |
| 1270   | Ftaxilide                            | Antidiabetic         | 19368-18-4  |      | 184     | 269 | 1.95  | 4   |
| 1271   | Ftivazide                            | Antibacterial        | 149-17-7    |      | 220     | 271 | 1.00  | 6   |
| 1272   | Ftormetazine                         | Antipsychotic        | 33414-30-1  |      | 253     | 421 | 4.59  | 4   |
| 1273   | Ftorpropazine                        | Antidepressant       | 33414-36-7  |      | 101     | 452 | 3.88  | 5   |
| 1274   | Fudosteine                           | Mucolytic            | 13189-98-5  | Y    | 200     | 179 | -0.46 | 4   |
| 1275   | Fulvestrant                          | Antineoplastic       | 129453-61-8 |      | 108     | 607 | 8.07  | 3   |
| 1276   | Fumagillin                           | Antineoplastic       | 23110-15-8  | Y    | 192     | 459 | 2.26  | 7   |
| 1277   | Furacrinic Acid                      | Unclassified         | 23580-33-8  |      | 142     | 258 | 2.67  | 4   |
| 1278   | Furalazine                           | Antibiotic           | 556-12-7    |      | 266     | 233 | -0.19 | 8   |
| 1279   | Furaltadone                          | Antibiotic           | 139-91-3    |      | 207     | 324 | -0.42 | 10  |
| 1280   | Furazabol                            | Steroid              | 1239-29-8   |      | 152     | 330 | 4.88  | 4   |
| 1281   | Furazolium Chloride                  | Antibacterial        | 3878-26-0   |      | 250     | 274 |       | 6   |
| 1282   | Furethidine                          | Antihypertensive     | 2385-81-1   |      | 28      | 361 | 2.12  | 5   |
| 1283   | Furfuryltrimethyl<br>Ammonium Iodide | Unclassified         | 7618-86-2   |      | 118     | 267 |       |     |
| 1284   | Furidarone                           | Cardiotonic          | 4662-17-3   |      | 171     | 468 | 2.75  | 3   |
| 1285   | Furmethoxadone                       | Unclassified         | 6281-26-1   |      | 256     | 239 | 0.49  | 8   |
| 1286   | Furobufen                            | Antiinflammatory     | 38873-55-1  |      | 173     | 268 | 3.31  | 4   |
| 1287   | Furodazole                           | Anthelmintic         | 56119-96-1  |      | 281     | 265 | 1.02  | 5   |
| 1288   | Furosemide                           | Diuretic             | 54-31-9     | Y    | 204     | 331 | 2.30  | 7   |
| 1289   | Fusidic Acid                         | Antibacterial        | 6990-06-3   | Y    | 193     | 517 | 5.76  | 6   |



| Number | Common Name                | Indication                      | CAS Number  | Oral | MP (°C) | MW  | ClogP | HBA |
|--------|----------------------------|---------------------------------|-------------|------|---------|-----|-------|-----|
| 1290   | Gabapentin                 | Anticonvulsant                  | 60142-96-3  | Y    | 160     | 171 | 1.08  | 3   |
| 1291   | Gacyclidine                | Anticonvulsant                  | 68134-81-6  |      | 81      | 263 | 4.88  | 1   |
| 1292   | Galantamine                | Nootropic                       | 357-70-0    | Y    | 125     | 287 | -0.05 | 4   |
| 1293   | Gallamine Triethiodide     | Neuromuscular<br>Blocking Agent | 65-29-2     |      | 150     | 892 |       |     |
| 1294   | Gamma-Aminobutyric<br>Acid | Antihypertensive                | 56-12-2     |      | 196     | 103 | -0.64 | 3   |
| 1295   | Ganciclovir                | Antiviral                       | 82410-32-0  | Y    | 250     | 255 | -1.61 | 9   |
| 1296   | Gapicomine                 | Analgesic                       | 1539-39-5   |      | 165     | 199 | 0.07  | 3   |
| 1297   | Gatifloxacin               | Antibiotic                      | 112811-59-3 |      | 163     | 375 | 2.10  | 7   |
| 1298   | Gefitinib                  | Antineoplastic                  | 184475-35-2 | Y    | 194     | 447 | 2.70  | 7   |
| 1299   | Gemcabene Calcium          | Antihyperlipidemic              | 183293-82-5 |      | 50      | 302 | 2.55  | 5   |
| 1300   | Gemcadiol                  | Antihyperlipidemic              | 35449-36-6  |      | 61      | 230 | 3.52  | 2   |
| 1301   | Gemcitabine                | Antineoplastic                  | 95058-81-4  |      | 200     | 263 | -2.22 | 7   |
| 1302   | Gemfibrozil                | Antihyperlipidemic              | 25812-30-0  | Y    | 61      | 250 | 4.30  | 3   |
| 1303   | Gemopatrilat               | Antihypertensive                | 160135-92-2 |      | 175     | 378 | 3.37  | 6   |
| 1304   | Gepefrine                  | Antihypotensive                 | 18840-47-6  |      | 157     | 151 | 1.11  | 2   |
| 1305   | Gestadienol                | Unclassified                    | 14340-01-3  |      | 204     | 314 | 2.37  | 3   |
| 1306   | Gestodene                  | Progestogen                     | 60282-87-3  |      | 198     | 310 | 2.02  | 2   |
| 1307   | Gestonorone Caproate       | Progestogen                     | 1253-28-7   |      | 124     | 415 | 5.40  | 4   |
| 1308   | Gestrinone                 | Progestogen                     | 16320-04-0  | Y    | 154     | 308 | 3.31  | 2   |
| 1309   | Gimeracil                  | Antineoplastic                  | 103766-25-2 |      | 268     | 146 | 1.38  | 3   |
| 1310   | Giparmen                   | Unclassified                    | 67268-43-3  |      | 134     | 214 | 2.52  | 3   |
| 1311   | Gitaloxin                  | Cardiotonic                     | 3261-53-8   |      | 252     | 809 | 1.89  | 15  |
| 1312   | Glafenine                  | Analgesic                       | 3820-67-5   |      | 168     | 373 | 3.02  | 6   |
| 1313   | Glauucarubin               | Antiamoebic                     | 1448-23-3   |      | 253     | 497 | -0.81 | 10  |
| 1314   | Glaziovine                 | Antiulcerative                  | 6808-72-6   |      | 230     | 297 | -1.30 | 4   |
| 1315   | Glemanserin                | Anxiolytic                      | 107703-78-6 |      | 127     | 295 | 3.54  | 2   |
| 1316   | Gliamilide                 | Antidiabetic                    | 51876-98-3  |      | 91      | 492 | 2.11  | 10  |
| 1317   | Glibornuride               | Antidiabetic                    | 26944-48-9  | Y    | 194     | 366 | 2.69  | 6   |
| 1318   | Gliclazide                 | Antidiabetic                    | 21187-98-4  |      | 173     | 323 | 1.61  | 6   |
| 1319   | Gliflumide                 | Antidiabetic                    | 35273-88-2  |      | 205     | 501 | 2.91  | 8   |
| 1320   | Glimepiride                | Antidiabetic                    | 93479-97-1  | Y    | 209     | 491 | 3.45  | 9   |
| 1321   | Glipizide                  | Antidiabetic                    | 29094-61-9  | Y    | 205     | 446 | 1.88  | 9   |
| 1322   | Gliquidone                 | Antidiabetic                    | 33342-05-1  |      | 181     | 528 | 3.91  | 9   |
| 1323   | Glisoxepide                | Antidiabetic                    | 25046-79-1  |      | 190     | 450 | 0.81  | 10  |
| 1324   | Gluconolactone             | Antidote                        | 90-80-2     |      | 142     | 178 | -3.47 | 6   |
| 1325   | Glucosamine                | Antirheumatic                   | 3416-24-8   | Y    | 102     | 179 | -3.05 | 6   |
| 1326   | Glucuro lactone            | Unclassified                    | 32449-92-6  |      | 173     | 176 | -3.46 | 6   |
| 1327   | Glutamic Acid              | Anticonvulsant                  | 56-86-0     |      | 199     | 147 | -0.97 | 5   |
| 1328   | Glutaurine                 | Anticonvulsant                  | 56488-60-9  |      | 225     | 254 | -3.43 | 8   |
| 1329   | Glutethimide               | Sedative                        | 77-21-4     |      | 78      | 217 | 1.75  | 3   |
| 1330   | Glyburide                  | Antidiabetic                    | 10238-21-8  | Y    | 170     | 494 | 3.08  | 8   |

| Number | Common Name            | Indication       | CAS Number  | Oral | MP (°C) | MW  | ClogP | HBA |
|--------|------------------------|------------------|-------------|------|---------|-----|-------|-----|
| 1331   | Glybuthiazol           | Antidiabetic     | 535-65-9    |      | 222     | 312 | 1.79  | 6   |
| 1332   | Glybuzole              | Antidiabetic     | 1492-02-0   |      | 163     | 297 | 2.81  | 5   |
| 1333   | Glycopyramide          | Antiarrhythmic   | 631-27-6    |      | 201     | 304 | 0.65  | 6   |
| 1334   | Glycopyrrolate         | Antispasmodic    | 596-51-0    | Y    | 194     | 398 |       |     |
| 1335   | Glycyclamide           | Antitussive      | 664-95-9    |      | 170     | 296 | 2.81  | 5   |
| 1336   | Glycyrrhizin           | Antiinflammatory | 1405-86-3   |      | 220     | 823 | 4.64  | 16  |
| 1337   | Glyhexamide            | Antidiabetic     | 451-71-8    |      | 154     | 322 | 3.63  | 5   |
| 1338   | Glymidine Sodium       | Antidiabetic     | 339-44-6    |      | 153     | 309 | -0.07 | 7   |
| 1339   | Glyoctamide            | Antidiabetic     | 1038-59-1   |      | 146     | 324 | 3.86  | 5   |
| 1340   | Glyparamide            | Antidiabetic     | 5581-42-0   |      | 159     | 354 | 3.30  | 6   |
| 1341   | Glypinamide            | Unclassified     | 1228-19-9   |      | 192     | 332 | 1.71  | 6   |
| 1342   | Grepafloxacin          | Antibiotic       | 119914-60-2 | Y    | 191     | 359 | 2.57  | 6   |
| 1343   | Griseofulvin           | Antifungal       | 126-07-8    | Y    | 219     | 353 | 2.01  | 6   |
| 1344   | Guacetisal             | Analgesic        | 55482-89-8  |      | 70      | 286 | 2.61  | 5   |
| 1345   | Guaiacol               | Expectorant      | 90-05-1     |      | 32      | 124 | 1.34  | 2   |
| 1346   | Guaiacol Carbonate     | Expectorant      | 553-17-3    |      | 89      | 274 | 2.74  | 5   |
| 1347   | Guaietolin             | Expectorant      | 63834-83-3  |      | 65      | 212 | 0.97  | 4   |
| 1348   | Guaiifenesin           | Expectorant      | 93-14-1     | Y    | 76      | 198 | 0.46  | 4   |
| 1349   | Guanabenz              | Antihypertensive | 5051-62-7   |      | 227     | 231 | 2.66  | 4   |
| 1350   | Guancydine             | Antihypertensive | 1113-10-6   |      | 156     | 154 | 1.25  | 4   |
| 1351   | Guanethidine           | Antihypertensive | 55-65-2     | Y    | 164     | 198 | 1.10  | 4   |
| 1352   | Guanfacine             | Antihypertensive | 29110-47-2  | Y    | 226     | 246 | 1.33  | 4   |
| 1353   | Guanidine              | Cholinergic      | 113-00-8    |      | 150     | 59  | -1.25 | 3   |
| 1354   | Guanoxan               | Antihypertensive | 2165-19-7   |      | 165     | 207 | 0.83  | 5   |
| 1355   | Guanoxyfen Sulfate     | Antihypertensive | 13050-83-4  |      | 82      | 193 | 0.84  | 4   |
| 1356   | Halazepam              | Sedative         | 23092-17-3  | Y    | 166     | 353 | 3.54  | 3   |
| 1357   | Halcinonide            | Antiinflammatory | 3093-35-4   |      | 265     | 455 | 3.03  | 5   |
| 1358   | Halobetasol Propionate | Antiinflammatory | 66852-54-8  |      | 221     | 485 | 2.95  | 5   |
| 1359   | Halofuginone           | Antiprotozoal    | 55837-20-2  |      | 194     | 415 | 3.41  | 6   |
| 1360   | Halometasone           | Antiinflammatory | 50629-82-8  |      | 221     | 445 | 2.26  | 5   |
| 1361   | Haloperidol            | Antispasmodic    | 52-86-8     | Y    | 149     | 376 | 3.76  | 3   |
| 1362   | Halopredone Acetate    | Antiinflammatory | 57781-14-3  |      | 291     | 559 | 2.36  | 7   |
| 1363   | Haloprogestrone        | Progestogen      | 3538-57-6   |      | 177     | 411 | 3.78  | 2   |
| 1364   | Haloproglin            | Antibacterial    | 777-11-7    |      | 114     | 361 | 5.53  | 1   |
| 1365   | Haloxazolam            | Sedative         | 59128-97-1  |      | 185     | 377 | 1.42  | 4   |
| 1366   | Haloxon                | Anthelminthic    | 321-55-1    |      | 91      | 416 | 3.76  | 6   |
| 1367   | Hepronicate            | Vasodilator      | 7237-81-2   |      | 95      | 506 | 5.02  | 9   |
| 1368   | Heptabarbital          | Sedative         | 509-86-4    |      | 175     | 250 | 2.03  | 5   |
| 1369   | Heptolamide            | Antidepressant   | 1034-82-8   |      | 157     | 310 | 3.33  | 5   |
| 1370   | Hetacillin             | Antibiotic       | 3511-16-8   |      | 187     | 389 | 8.43  | 7   |
| 1371   | Hexacyprone            | Mydriatic        | 892-01-3    |      | 71      | 260 | 2.39  | 3   |
| 1372   | Hexamethonium Bromide  | Antihypertensive | 55-97-0     |      | 272     | 362 |       |     |
| 1373   | Hexamidine             | Antiulcerative   | 125-33-7    |      | 282     | 218 | 0.83  | 4   |

| Number | Common Name                     | Indication                    | CAS Number | Oral | MP (°C) | MW  | ClogP | HBA |
|--------|---------------------------------|-------------------------------|------------|------|---------|-----|-------|-----|
| 1374   | Hexapradol                      | Unclassified                  | 15599-37-8 |      | 60      | 283 | 3.79  | 2   |
| 1375   | Hexaprofen                      | Antiinflammatory              | 24645-20-3 |      | 111     | 232 | 4.48  | 2   |
| 1376   | Hexapropymate                   | Sedative                      | 358-52-1   |      | 99      | 181 | 1.85  | 3   |
| 1377   | Hexasonium Iodide               | Antispasmodic                 | 25330-82-9 |      | 102     | 434 |       |     |
| 1378   | Hexazole                        | Unclassified                  | 4671-03-8  |      | 89      | 179 | 1.24  | 3   |
| 1379   | Hexcarbacholine Bromide         | Muscle Relaxant<br>(Skeletal) | 306-41-2   |      | 175     | 354 |       |     |
| 1380   | Hexestrol                       | Estrogen                      | 84-16-2    |      | 187     | 270 | 5.14  | 2   |
| 1381   | Hexobarbital                    | Sedative                      | 56-29-1    |      | 146     | 236 | 1.46  | 5   |
| 1382   | Hexobendine                     | Vasodilator                   | 54-03-5    |      | 76      | 593 | 5.41  | 12  |
| 1383   | Hexylresorcinol                 | Anthelminthic                 | 136-77-6   |      | 68      | 194 | 3.77  | 2   |
| 1384   | Histamine                       | Antineoplastic                | 51-45-6    |      | 182     | 111 | -0.70 | 3   |
| 1385   | Homatropine<br>Hydrobromide     | Mydriatic                     | 87-00-3    |      | 85      | 275 |       | 4   |
| 1386   | Homatropine<br>Methylbromide    | Mydriatic                     | 31610-86-3 | Y    | 192     | 370 |       |     |
| 1387   | Homidium Bromide                | Anthelminthic                 | 1239-45-8  |      | 92      | 394 | 1.31  |     |
| 1388   | Hopantenic Acid                 | Nootropic                     | 18679-90-8 |      | 63      | 233 | -0.64 | 6   |
| 1389   | Hycanthon                       | Anthelminthic                 | 3105-97-3  |      | 102     | 356 | 3.81  | 4   |
| 1390   | Hydracarbazine                  | Diuretic                      | 3614-47-9  |      | 250     | 153 | -1.42 | 6   |
| 1391   | Hydralazine                     | Antihypertensive              | 86-54-4    | Y    | 173     | 160 | 0.95  | 4   |
| 1392   | Hydrastine                      | Cardiotonic                   | 118-08-1   |      | 132     | 383 | 2.46  | 7   |
| 1393   | Hydrastinine                    | Cardiotonic                   | 6592-85-4  |      | 117     | 207 | 1.12  | 4   |
| 1394   | Hydrobentzide                   | Diuretic                      | 13957-38-5 |      | 211     | 434 | 1.15  | 7   |
| 1395   | Hydrochlorothiazide             | Diuretic                      | 58-93-5    | Y    | 268     | 298 | -0.02 | 7   |
| 1396   | Hydrocodone                     | Antitussive                   | 125-29-1   | Y    | 150     | 299 | 2.57  | 4   |
| 1397   | Hydrocortamate                  | Glucocorticoid                | 76-47-1    |      | 163     | 476 | 3.36  | 7   |
| 1398   | Hydrocortisone                  | Glucocorticoid                | 50-23-7    | Y    | 216     | 362 | 1.76  | 5   |
| 1399   | Hydrocortisone Acetate          | Glucocorticoid                | 50-03-3    |      | 215     | 405 | 2.38  | 6   |
| 1400   | Hydrocortisone Buteprate        | Glucocorticoid                | 72590-77-3 |      | 122     | 489 | 3.90  | 7   |
| 1401   | Hydrocortisone Butyrate         | Glucocorticoid                | 13609-67-1 |      | 212     | 433 | 3.36  | 6   |
| 1402   | Hydrocortisone<br>Hemisuccinate | Glucocorticoid                | 2203-97-6  |      | 171     | 463 | 2.55  | 8   |
| 1403   | Hydrocortisone Tebutate         | Glucocorticoid                | 508-96-3   |      | 168     | 461 | 4.17  | 6   |
| 1404   | Hydrocortisone Valerate         | Glucocorticoid                | 57524-89-7 |      | 189     | 447 | 3.87  | 6   |
| 1405   | Hydrocotarnine                  | Hemostatic                    | 550-10-7   |      | 56      | 221 | 1.96  | 4   |
| 1406   | Hydroflumethiazide              | Antihypertensive              | 135-09-1   | Y    | 271     | 331 | 0.08  | 7   |
| 1407   | Hydromorphinol                  | Analgesic                     | 2183-56-4  |      | 252     | 303 | -0.21 | 5   |
| 1408   | Hydromorphone                   | Analgesic                     | 466-99-9   | Y    | 265     | 285 | 2.13  | 4   |
| 1409   | Hydroxyamphetamine              | Adrenergic                    | 103-86-6   |      | 125     | 151 | 1.14  | 2   |
| 1410   | Hydroxychloroquine              | Antimalarial                  | 118-42-3   | Y    | 90      | 336 | 3.53  | 4   |
| 1411   | Hydroxyhexamide                 | Antidiabetic                  | 3168-01-2  |      | 151     | 326 | 1.69  | 6   |
| 1412   | Hydroxypethidine                | Analgesic                     | 468-56-4   |      | 110     | 263 | 1.58  | 4   |

| Number | Common Name                     | Indication                    | CAS Number  | Oral | MP (°C) | MW  | ClogP  | HBA |
|--------|---------------------------------|-------------------------------|-------------|------|---------|-----|--------|-----|
| 1413   | Hydroxyphenamate                | Anxiolytic                    | 50-19-1     |      | 57      | 209 | 1.56   | 4   |
| 1414   | Hydroxyprocaine                 | Analgesic                     | 487-53-6    |      | 154     | 252 | 2.77   | 5   |
| 1415   | Hydroxyprogesterone             | Progestogen                   | 68-96-2     |      | 217     | 330 | 3.04   | 3   |
| 1416   | Hydroxyprogesterone<br>Caproate | Progestogen                   | 630-56-8    |      | 121     | 429 | 5.68   | 4   |
| 1417   | Hydroxystenozole                | Unclassified                  | 19120-01-5  |      | 254     | 326 | 5.53   | 3   |
| 1418   | Hydroxystilbamidine             | Antiprotozoal                 | 495-99-8    |      | 235     | 280 | 1.30   | 5   |
| 1419   | Hydroxytetracaine               | Anesthetic                    | 490-98-2    |      | 155     | 280 | 4.24   | 5   |
| 1420   | Hydroxytoluic Acid              | Antiinflammatory              | 83-40-9     |      | 164     | 152 | 2.59   | 3   |
| 1421   | Hydroxyurea                     | Antineoplastic                | 127-07-1    | Y    | 138     | 76  | -1.80  | 4   |
| 1422   | Hydroxyzine                     | Anxiolytic                    | 68-88-2     | Y    | 220     | 375 | 2.32   | 4   |
| 1423   | Hydroxyzine Pamoate             | Anxiolytic                    | 130-85-8    |      | 231     | 388 | 6.17   | 6   |
| 1424   | Hymecromone                     | Choleretic                    | 90-33-5     |      | 185     | 176 | 2.43   | 3   |
| 1425   | Hyoscyamine                     | Antispasmodic                 | 101-31-5    |      | 108     | 289 | 1.38   | 4   |
| 1426   | Ibacinabine                     | Antiviral                     | 611-53-0    |      | 160     | 353 | -1.02  | 7   |
| 1427   | Ibandronate                     | Bone Resorption<br>Inhibitor  | 114084-78-5 |      | 84      | 319 | 2.33   | 8   |
| 1428   | Ibrotamide                      | Sedative                      | 466-14-8    |      | 48      | 208 | 1.62   | 2   |
| 1429   | Ibudilast                       | Vasodilator                   | 50847-11-5  | Y    | 54      | 230 | 2.44   | 3   |
| 1430   | Ibufenac                        | Analgesic                     | 1553-60-2   |      | 84      | 192 | 3.25   | 2   |
| 1431   | Ibuprofen                       | Antiinflammatory              | 15687-27-1  | Y    | 76      | 206 | 3.50   | 2   |
| 1432   | Ibuprofen                       | Antiinflammatory              | 53648-05-8  |      | 119     | 221 | 3.31   | 3   |
| 1433   | Icopezil Maleate                | Nootropic                     | 145508-78-7 |      | 161     | 375 | 3.85   | 5   |
| 1434   | Idebenone                       | Nootropic                     | 58186-27-9  | Y    | 50      | 338 | 3.91   | 5   |
| 1435   | Idoxuridine                     | Antiviral                     | 54-42-2     |      | 176     | 354 | -0.59  | 7   |
| 1436   | Idramantone                     | Unclassified                  | 20098-14-0  |      | 319     | 166 | -0.28  | 2   |
| 1437   | Idrocilamide                    | Muscle Relaxant<br>(Skeletal) | 6961-46-2   |      | 103     | 191 | 0.44   | 3   |
| 1438   | Idronoxil                       | Antineoplastic                | 81267-65-4  | Y    | 198     | 240 | 3.35   | 3   |
| 1439   | Ifenprodil                      | Vasodilator                   | 23210-56-2  | Y    | 114     | 325 | 3.61   | 3   |
| 1440   | Ifosfamide                      | Antineoplastic                | 3778-73-2   |      | 44      | 261 | 0.76   | 4   |
| 1441   | Ilepcimide                      | Anticonvulsant                | 82857-82-7  |      | 88      | 259 | 2.76   | 4   |
| 1442   | Imatinib                        | Antineoplastic                | 152459-95-5 | Y    | 209     | 494 | 2.89   | 8   |
| 1443   | Imazodan                        | Cardiotonic                   | 84243-58-3  |      | 212     | 240 | 0.02   | 5   |
| 1444   | Imidaprilat                     | Antihypertensive              | 89371-44-8  |      | 240     | 377 | 2.79   | 9   |
| 1445   | Imidazole Salicylate            | Antiinflammatory              | 288-32-4    |      | 90      | 68  | -0.099 | 2   |
| 1446   | Iminophenimide                  | Unclassified                  | 7008-18-6   |      | 117     | 218 | 1.14   | 4   |
| 1447   | Imipramine                      | Antidepressant                | 50-49-7     | Y    | 173     | 280 | 4.36   | 2   |
| 1448   | Imipraminoxide                  | Antidepressant                | 6829-98-7   |      | 122     | 296 | 1.71   | 3   |
| 1449   | Imiquimod                       | Antiviral                     | 99011-02-6  |      | 293     | 240 | 3.01   | 4   |
| 1450   | Improsulfan                     | Antineoplastic                | 13425-98-4  |      | 105     | 289 | -0.76  | 7   |
| 1451   | Incadronic Acid                 | Antineoplastic                | 124351-85-5 |      | 232     | 287 | 1.96   | 7   |
| 1452   | Incyclinide                     | Dermatologic                  | 15866-90-7  | Y    | 228     | 371 | 0.84   | 8   |

| Number | Common Name          | Indication       | CAS Number  | Oral | MP (°C) | MW  | ClogP | HBA |
|--------|----------------------|------------------|-------------|------|---------|-----|-------|-----|
| 1453   | Indacrinone          | Antihypertensive | 56049-88-8  |      | 167     | 365 | 3.23  | 4   |
| 1454   | Indalpine            | Antidepressant   | 63758-79-2  |      | 162     | 228 | 3.06  | 2   |
| 1455   | Indanazoline         | Decongestant     | 40507-78-6  |      | 109     | 201 | 2.26  | 3   |
| 1456   | Indanorex            | Anorexic         | 16112-96-2  |      | 98      | 191 | 1.76  | 2   |
| 1457   | Indapamide           | Antihypertensive | 26807-65-8  | Y    | 162     | 366 | 1.96  | 6   |
| 1458   | Indecainide          | Antiarrhythmic   | 74517-78-5  |      | 94      | 308 | 3.87  | 3   |
| 1459   | Indenolol            | Antiarrhythmic   | 60607-68-3  | Y    | 89      | 247 |       |     |
| 1460   | Indisulam            | Antineoplastic   | 165668-41-7 |      | 242     | 386 | 2.49  | 7   |
| 1461   | Indobufen            | Antithrombotic   | 63610-08-2  |      | 183     | 295 | 3.33  | 4   |
| 1462   | Indomethacin         | Antiinflammatory | 53-86-1     | Y    | 160     | 358 | 4.25  | 5   |
| 1463   | Indopine             | Urologic         | 3569-26-4   |      | 129     | 332 | 5.62  | 2   |
| 1464   | Indoprofen           | Analgesic        | 31842-01-0  |      | 213     | 281 | 2.82  | 4   |
| 1465   | Indoramin            | Antihypertensive | 26844-12-2  |      | 209     | 347 | 2.87  | 4   |
| 1466   | Indoxole             | Antiinflammatory | 5034-76-4   |      | 151     | 329 | 3.76  | 3   |
| 1467   | Inosine Pranobex     | Antiviral        | 58-63-9     | Y    | 217     | 268 | -1.97 | 9   |
| 1468   | Inproquone           | Antiamoebic      | 436-40-8    |      | 105     | 306 | 2.07  | 6   |
| 1469   | Intermedine          | Antineoplastic   | 10285-06-0  |      | 141     | 299 | -0.24 | 6   |
| 1470   | Intopicine           | Antiarrhythmic   | 125974-72-3 |      | 216     | 348 | 4.01  | 5   |
| 1471   | Iodoform             | Antibacterial    | 75-47-8     |      | 121     | 394 | 3.12  | 0   |
| 1472   | Iodophthalein Sodium | Laxative         | 386-17-4    |      | 237     | 822 | 5.58  | 4   |
| 1473   | Iodoquinol           | Antiamoebic      | 83-73-8     |      | 210     | 397 | 4.10  | 2   |
| 1474   | Ipazilide Fumarate   | Antiarrhythmic   | 115436-73-2 |      | 72      | 391 | 5.17  | 5   |
| 1475   | Ipidacrine           | Nootropic        | 62732-44-9  |      | 203     | 188 | 1.65  | 2   |
| 1476   | Ipragratine          | Unclassified     | 22150-28-3  |      | 110     | 331 | 2.77  | 4   |
| 1477   | Iprazochrome         | Hemostatic       | 7248-21-7   |      | 204     | 264 | 0.08  | 7   |
| 1478   | Ipriflavone          | Steroid          | 35212-22-7  |      | 115     | 280 | 4.25  | 3   |
| 1479   | Iprindole            | Antidepressant   | 5560-72-5   |      | 146     | 284 | 5.02  | 2   |
| 1480   | Iproclozide          | Antidepressant   | 3544-35-2   |      | 93      | 243 | 1.99  | 4   |
| 1481   | Iproniazid           | Antidepressant   | 54-92-2     |      | 112     | 179 | 0.41  | 4   |
| 1482   | Ipronidazole         | Antiprotozoal    | 14885-29-1  |      | 60      | 169 | 0.96  | 5   |
| 1483   | Iprozilamine         | Unclassified     | 55477-19-5  |      | 145     | 316 | 2.64  | 5   |
| 1484   | Ipsapirone           | Anxiolytic       | 95847-70-4  |      | 137     | 401 | 0.97  | 8   |
| 1485   | Irbesartan           | Antihypertensive | 138402-11-6 | Y    | 181     | 429 | 5.25  | 7   |
| 1486   | Irindalone           | Antihypertensive | 96478-43-2  |      | 88      | 409 | 1.72  | 5   |
| 1487   | Irinotecan           | Antineoplastic   | 97682-44-5  |      | 222     | 587 | 3.73  | 10  |
| 1488   | Irloxacin            | Antibiotic       | 91524-15-1  |      | 252     | 300 | 1.93  | 5   |
| 1489   | Irsogladine          | Antiulcerative   | 57381-26-7  | Y    | 268     | 256 | 2.08  | 5   |
| 1490   | Isaxonine            | Nootropic        | 4214-72-6   |      | 27      | 137 | 1.03  | 3   |
| 1491   | Isbogrel             | Antithrombotic   | 89667-40-3  |      | 114     | 281 | 3.43  | 3   |
| 1492   | Isobromindione       | Anticoagulant    | 1470-35-5   |      | 166     | 301 | 3.93  | 2   |
| 1493   | Isobutamben          | Anesthetic       | 94-14-4     |      | 65      | 193 | 2.70  | 3   |
| 1494   | Isocarboxazid        | Antidepressant   | 59-63-2     |      | 106     | 231 | 1.63  | 5   |

| Number | Common Name            | Indication         | CAS Number  | Oral | MP (°C) | MW  | ClogP | HBA |
|--------|------------------------|--------------------|-------------|------|---------|-----|-------|-----|
| 1495   | Isocromil              | Antihistaminic     | 57009-15-1  |      | 208     | 324 | 4.32  | 5   |
| 1496   | Isofezolac             | Antiinflammatory   | 50270-33-2  |      | 200     | 354 | 3.56  | 4   |
| 1497   | Isoflupredone Acetate  | Antiinflammatory   | 338-98-7    |      | 239     | 420 | 2.12  | 6   |
| 1498   | Isoflurane             | Anesthetic         | 26675-46-7  |      | 49      | 184 | 2.12  | 1   |
| 1499   | Isomazole              | Cardiotonic        | 86315-52-8  |      | 143     | 287 | 1.14  | 5   |
| 1500   | Isoniazid              | Antibiotic         | 54-85-3     | Y    | 170     | 137 | -0.77 | 4   |
| 1501   | Isonixin               | Analgesic          | 57021-61-1  |      | 267     | 242 | 0.55  | 4   |
| 1502   | Isoprednidene          | Glucocorticoid     | 17332-61-5  |      | 234     | 372 | 1.51  | 5   |
| 1503   | Isoprofen              | Antiinflammatory   | 57144-56-6  |      | 90      | 232 | 4.09  | 2   |
| 1504   | Isopropamide           | Antispasmodic      | 7492-32-2   |      | 84      | 354 |       |     |
| 1505   | Isoproterenol          | Bronchodilator     | 7683-59-2   |      | 171     | 211 | 0.32  | 4   |
| 1506   | Isosorbide             | Antianginal        | 652-67-5    |      | 64      | 146 | -1.19 | 4   |
| 1507   | Isosorbide Dinitrate   | Antianginal        | 87-33-2     | Y    | 70      | 236 | 0.95  | 10  |
| 1508   | Isosorbide Mononitrate | Vasodilator        | 16051-77-7  |      | 88      | 191 | -0.18 | 7   |
| 1509   | Isospaglumic Acid      | Nootropic          | 3106-85-2   |      | 171     | 304 | -2.63 | 10  |
| 1510   | Isotretinoin           | Dermatologic       | 4759-48-2   | Y    | 161     | 300 | 6.26  | 2   |
| 1511   | Isovaleramide          | Anxiolytic         | 541-46-8    |      | 135     | 101 | 0.51  | 2   |
| 1512   | Isoxepac               | Antiinflammatory   | 55453-87-7  |      | 135     | 268 | 2.11  | 4   |
| 1513   | Isoxicam               | Antiinflammatory   | 34552-84-6  |      | 265     | 335 | 0.90  | 8   |
| 1514   | Isoxsuprine            | Vasodilator        | 395-28-8    |      | 103     | 301 | 2.80  | 4   |
| 1515   | Isradipine             | Antihypertensive   | 75695-93-1  | Y    | 169     | 371 | 3.73  | 8   |
| 1516   | Israpafant             | Antithrombotic     | 117279-73-9 |      | 130     | 489 | 6.02  | 4   |
| 1517   | Istradefylline         | Antiparkinsonian   | 155270-99-8 | Y    | 191     | 384 | 2.63  | 8   |
| 1518   | Itanoxone              | Analgesic          | 58182-63-1  |      | 212     | 300 | 3.47  | 3   |
| 1519   | Itasetron              | Antidepressant     | 123258-84-4 |      | 206     | 300 | 1.62  | 6   |
| 1520   | Itazigrel              | Anticoagulant      | 70529-35-0  |      | 51      | 365 | 4.89  | 3   |
| 1521   | Itopride               | Gastroprokinetic   | 122898-67-3 |      | 109     | 358 | 1.42  | 6   |
| 1522   | Itraconazole           | Antifungal         | 84625-61-6  | Y    | 166     | 705 | 5.00  | 12  |
| 1523   | Josamycin              | Antibiotic         | 16846-24-5  | Y    | 132     | 828 | 4.73  | 16  |
| 1524   | Kainic Acid            | Anthelmintic       | 487-79-6    |      | 245     | 213 | 0.64  | 5   |
| 1525   | Kalafungin             | Antifungal         | 11048-15-0  |      | 163     | 300 | 0.81  | 6   |
| 1526   | Kebuzone               | Antirheumatic      | 853-34-9    |      | 126     | 322 | 1.24  | 5   |
| 1527   | Ketamine               | Anesthetic         | 6740-88-1   |      | 92      | 238 | 3.01  | 2   |
| 1528   | Ketanserin             | Antihypertensive   | 74050-98-9  |      | 227     | 395 | 3.56  | 6   |
| 1529   | Ketazolam              | Anxiolytic         | 27223-35-4  | Y    | 182     | 369 | 0.51  | 5   |
| 1530   | Ketobemidone           | Analgesic          | 469-79-4    |      | 156     | 247 | 0.80  | 3   |
| 1531   | Ketoconazole           | Antifungal         | 65277-42-1  | Y    | 150     | 531 | 4.04  | 8   |
| 1532   | Ketoprofen             | Antiinflammatory   | 22071-15-4  | Y    | 94      | 254 | 2.91  | 3   |
| 1533   | Ketorolac              | Analgesic          | 74103-06-3  | Y    | 160     | 255 | 2.68  | 4   |
| 1534   | Ketotifen              | Antihistaminic     | 34580-13-7  | Y    | 152     | 309 | 2.19  | 2   |
| 1535   | Khellin                | Vasodilator        | 82-02-0     |      | 154     | 260 | 1.73  | 5   |
| 1536   | Khelloside             | Antihyperlipidemic | 17226-75-4  |      | 175     | 408 | -1.16 | 10  |
| 1537   | Kitasamycin            | Antibacterial      | 1392-21-8   |      | 126     | 702 |       |     |

| Number | Common Name        | Indication           | CAS Number  | Oral | MP (°C) | MW  | ClogP | HBA |
|--------|--------------------|----------------------|-------------|------|---------|-----|-------|-----|
| 1538   | Labetalol          | Antihypertensive     | 36894-69-6  | Y    | 166     | 328 | 2.72  | 5   |
| 1539   | Lachesine Chloride | Unclassified         | 1164-38-1   |      | 213     | 364 |       |     |
| 1540   | Lacidipine         | Antihypertensive     | 103890-78-4 | Y    | 174     | 456 | 5.99  | 7   |
| 1541   | Lacosamide         | Antiprotozoal        | 175481-36-4 | Y    | 142     | 250 | 0.73  | 5   |
| 1542   | Lactitol           | Laxative             | 585-86-4    |      | 146     | 344 | -4.68 | 11  |
| 1543   | Lactulose          | Laxative             | 4618-18-2   | Y    | 169     | 342 | -2.97 | 11  |
| 1544   | Lamivudine         | Antiviral            | 134678-17-4 | Y    | 160     | 229 | -0.51 | 6   |
| 1545   | Lamotrigine        | Anticonvulsant       | 84057-84-1  | Y    | 216     | 256 | 1.24  | 5   |
| 1546   | Lanocanazole       | Antifungal           | 101530-10-3 |      | 140     | 320 | 3.46  | 3   |
| 1547   | Lansoprazole       | Antiulcerative       | 103577-45-3 | Y    | 178     | 369 | 2.58  | 5   |
| 1548   | Laquinimod         | Nootropic            | 248281-84-7 | Y    | 201     | 357 | 2.19  | 5   |
| 1549   | Lasalocid          | Antibiotic           | 25999-31-9  |      | 110     | 591 | 6.45  | 8   |
| 1550   | Ledazerol          | Antihypertensive     | 434283-16-6 |      | 152     | 204 | 0.41  | 8   |
| 1551   | Ledoxantrone       | Antineoplastic       | 113457-05-9 |      | 264     | 398 | 3.79  | 6   |
|        | Trihydrochloride   |                      |             |      |         |     |       |     |
| 1552   | Lefetamine         | Analgesic            | 7262-75-1   |      | 218     | 225 | 3.37  | 1   |
| 1553   | Leniquinsin        | Antihypertensive     | 10351-50-5  |      | 165     | 352 | 2.22  | 6   |
| 1554   | Letosteine         | Mucolytic            | 53943-88-7  | Y    | 142     | 279 | 0.88  | 5   |
| 1555   | Letrozole          | Antineoplastic       | 112809-51-5 | Y    | 181     | 285 | 0.43  | 5   |
| 1556   | Leucocianidol      | Capillary Protectant | 480-17-1    |      | 213     | 306 | -0.25 | 7   |
| 1557   | Leucovorin         | Antidote             | 58-05-9     |      | 240     | 473 | -1.43 | 14  |
| 1558   | Levallorphan       | Antidote             | 152-02-3    |      | 180     | 283 | 3.85  | 2   |
| 1559   | Levamisole         | Anthelmintic         | 14769-73-4  |      | 230     | 204 | 1.84  | 2   |
| 1560   | Levcromakalim      | Antihypertensive     | 94535-50-9  |      | 243     | 286 | 2.13  | 5   |
| 1561   | Levobutamine       | Cardiotonic          | 96-82-2     |      | 162     | 358 | -3.85 | 12  |
|        | Lactobionate       |                      |             |      |         |     |       |     |
| 1562   | Levetiracetam      | Anticonvulsant       | 102767-28-2 | Y    | 115     | 170 |       |     |
| 1563   | Levisoprenaline    | Bronchodilator       | 51-31-0     |      | 157     | 211 | 0.32  | 4   |
| 1564   | Levofexidine       | Antihypertensive     | 81447-78-1  |      | 129     | 259 | 3.04  | 3   |
| 1565   | Levmetamfetamine   | Decongestant         | 33817-09-3  |      | 38      | 149 | 2.20  | 1   |
| 1566   | Levobetaxolol      | Antihypertensive     | 93221-48-8  |      | 71      | 307 | 2.53  | 4   |
| 1567   | Levobupivacaine    | Anesthetic           | 27262-47-1  |      | 135     | 288 | 3.31  | 3   |
| 1568   | Levodopa           | Antiparkinsonian     | 59-92-7     | Y    | 291     | 197 | -1.15 | 5   |
| 1569   | Levodropropizine   | Antitussive          | 99291-25-5  | Y    | 104     | 236 | -0.03 | 4   |
| 1570   | Levofloxacin       | Antibiotic           | 100986-85-4 | Y    | 226     | 361 | 1.86  | 7   |
| 1571   | Levomenthol        | Dermatologic         | 2216-51-5   |      | 42      | 156 | 3.22  | 1   |
| 1572   | Levomethorphan     | Antitussive          | 125-70-2    |      | 108     | 271 | 3.89  | 2   |
| 1573   | Levomoprolol       | Antihypertensive     | 77164-20-6  |      | 82      | 239 | 1.62  | 4   |
| 1574   | Levonorgestrel     | Progestogen          | 797-63-7    | Y    | 235     | 312 | 3.37  | 2   |
| 1575   | Levophenacymorphan | Analgesic            | 10061-32-2  |      | 173     | 361 | 4.36  | 3   |
| 1576   | Levopropoxyphene   | Antitussive          | 2338-37-6   |      | 75      | 339 | 4.10  | 3   |
| 1577   | Levorphanol        | Analgesic            | 77-07-6     | Y    | 198     | 257 | 3.26  |     |
| 1578   | Levosulpiride      | Antidepressant       | 23672-07-3  | Y    | 185     | 341 | 0.78  | 7   |

| Number | Common Name        | Indication                    | CAS Number  | Oral | MP (°C) | MW  | ClogP | HBA |
|--------|--------------------|-------------------------------|-------------|------|---------|-----|-------|-----|
| 1579   | Liarozole          | Antineoplastic                | 115575-11-6 |      | 108     | 309 | 2.57  | 4   |
| 1580   | Licarbazepine      | Anticonvulsant                | 29331-92-8  |      | 185     | 254 | 0.65  | 4   |
| 1581   | Licofelone         | Antiinflammatory              | 156897-06-2 |      | 156     | 380 | 6.70  | 3   |
| 1582   | Lidocaine          | Anesthetic                    | 137-58-6    |      | 68      | 234 | 2.20  | 3   |
| 1583   | Lidoflazine        | Vasodilator                   | 3416-26-0   |      | 159     | 492 | 5.42  | 4   |
| 1584   | Lidorestat         | Antidiabetic                  | 245116-90-9 |      | 177     | 376 | 2.58  | 4   |
| 1585   | Lindane            | Dermatologic                  | 58-89-9     |      | 113     | 291 | 3.82  | 0   |
| 1586   | Linezolid          | Antibiotic                    | 165800-03-3 | Y    | 182     | 337 | 0.45  | 7   |
| 1587   | Linoglriride       | Antidiabetic                  | 75358-37-1  |      | 172     | 286 | 1.41  | 5   |
| 1588   | Linopirdine        | Nootropic                     | 105431-72-9 |      | 186     | 391 | 1.95  | 4   |
| 1589   | Liothyronine       | Thyroid                       | 6893-02-3   | Y    | 234     | 651 | 3.91  | 5   |
| 1590   | Lisadimate         | Dermatologic                  | 136-44-7    |      | 116     | 211 | -0.14 | 5   |
| 1591   | Lisinopril         | Antihypertensive              | 76547-98-3  | Y    | 162     | 405 | 3.47  | 8   |
| 1592   | Lisuride           | Antimigraine                  | 18016-80-3  | Y    | 186     | 338 | 3.21  | 5   |
| 1593   | Lithium Carbonate  | Sedative                      | 463-79-6    | Y    | 238     | 62  | -0.82 | 3   |
| 1594   | Lixazinone Sulfate | Cardiotonic                   | 94192-59-3  |      | 244     | 384 | 2.69  | 7   |
| 1595   | Lobeline           | Respiratory Stimulant         | 90-69-7     |      | 130     | 337 | 3.61  | 3   |
| 1596   | Lobendazole        | Anthelminthic                 | 6306-71-4   |      | 324     | 205 | 2.03  | 5   |
| 1597   | Lobenzarit         | Antirheumatic                 | 63329-53-3  | Y    | 307     | 292 | 6.91  | 5   |
| 1598   | Lobucavir          | Antiviral                     | 127759-89-1 |      | 275     | 265 | -2.29 | 8   |
| 1599   | Lodaxaprine        | Antineoplastic                | 93181-81-8  |      | 154     | 290 | 1.71  | 4   |
| 1600   | Lodenosine         | Antiviral                     | 110143-10-7 |      | 226     | 253 | 0.09  | 7   |
| 1601   | Lodixinil          | Antihypertensive              | 86627-50-1  |      | 146     | 277 | 4.39  | 4   |
| 1602   | Lodoxamide         | Antihistaminic                | 53882-12-5  |      | 212     | 312 | -0.38 | 9   |
| 1603   | Lofentanil Oxalate | Analgesic                     | 61380-40-3  |      | 177     | 409 | 4.22  | 5   |
| 1604   | Lofepamine         | Antidepressant                | 23047-25-8  | Y    | 104     | 419 | 6.17  | 3   |
| 1605   | Lofexidine         | Antihypertensive              | 31036-80-3  | Y    | 127     | 259 | 3.04  | 3   |
| 1606   | Loflucarban        | Antifungal                    | 790-69-2    |      | 163     | 315 | 4.13  | 2   |
| 1607   | Lomefloxacin       | Antibiotic                    | 98079-51-7  |      | 239     | 351 | 2.46  | 6   |
| 1608   | Lomustine          | Antineoplastic                | 13010-47-4  | Y    | 89      | 234 | 2.72  | 5   |
| 1609   | Lonapalene         | Dermatologic                  | 91431-42-4  |      | 93      | 339 | 3.07  | 6   |
| 1610   | Lonazolac          | Antiinflammatory              | 53808-88-1  |      | 151     | 313 | 3.86  | 4   |
| 1611   | Lonidamine         | Antineoplastic                | 50264-69-2  | Y    | 207     | 321 | 4.63  | 4   |
| 1612   | Loprazolam         | Sedative                      | 61197-73-7  |      | 214     | 465 | 0.60  | 9   |
| 1613   | Loprodiol          | Muscle Relaxant<br>(Skeletal) | 2209-86-1   |      | 95      | 173 | 0.22  | 2   |
| 1614   | Loracarbef         | Antibiotic                    | 76470-66-1  | Y    | 205     | 350 | -1.60 | 7   |
| 1615   | Lorajmine          | Antiarrhythmic                | 47562-08-3  |      | 232     | 403 | 2.22  | 5   |
| 1616   | Loratadine         | Antihistaminic                | 79794-75-5  | Y    | 134     | 383 | 3.90  | 4   |
| 1617   | Lorazepam          | Anxiolytic                    | 846-49-1    | Y    | 167     | 321 | 2.38  | 4   |
| 1618   | Lorcainide         | Antiarrhythmic                | 59729-31-6  |      | 263     | 371 | 3.62  | 3   |
| 1619   | Lormetazepam       | Sedative                      | 848-75-9    | Y    | 206     | 335 | 2.35  | 4   |
| 1620   | Losartan           | Antihypertensive              | 114798-26-4 | Y    | 184     | 423 | 3.46  | 7   |



| Number | Common Name           | Indication         | CAS Number  | Oral | MP (°C) | MW  | ClogP | HBA |
|--------|-----------------------|--------------------|-------------|------|---------|-----|-------|-----|
| 1621   | Losmiprofen           | Analgesic          | 74168-08-4  |      | 120     | 319 | 3.84  | 4   |
| 1622   | Loteprednol Etabonate | Antiinflammatory   | 82034-46-6  |      | 221     | 467 | 2.42  | 7   |
| 1623   | Lotrifen              | Abortifacient      | 66535-86-2  |      | 239     | 280 | 4.09  | 3   |
| 1624   | Lovastatin            | Antihyperlipidemic | 75330-75-5  | Y    | 174     | 405 | 4.31  | 5   |
| 1625   | Loviride              | Antiviral          | 147362-57-0 |      | 226     | 351 | 3.91  | 4   |
| 1626   | Loxapine              | Anxiolytic         | 1977-10-2   | Y    | 107     | 328 | 2.41  | 4   |
| 1627   | Loxiglumide           | Gastroprokinetic   | 107097-80-3 |      | 113     | 461 | 4.37  | 7   |
| 1628   | Loxoprofen            | Antiinflammatory   | 68767-14-6  | Y    | 109     | 246 | 1.69  | 3   |
| 1629   | Lucanthone            | Anthelmintic       | 479-50-5    |      | 65      | 340 | 5.17  | 3   |
| 1630   | Lucartamide           | Antimigraine       | 76743-10-7  |      | 121     | 252 | 4.16  | 2   |
| 1631   | Lufenuron             | Ectoparasiticide   | 103055-07-8 |      | 174     | 511 | 5.91  | 5   |
| 1632   | Lufironil             | Dermatologic       | 128075-79-6 |      | 89      | 281 | 1.79  | 7   |
| 1633   | Lumiracoxib           | Antirheumatic      | 220991-20-8 | Y    | 152     | 294 | 4.74  | 3   |
| 1634   | Lynestrenol           | Progestogen        | 52-76-6     |      | 158     | 284 | 5.59  | 1   |
| 1635   | Lysergide             | Antidepressant     | 50-37-3     |      | 80      | 323 | 2.71  | 4   |
| 1636   | Mafenide              | Antibiotic         | 138-39-6    |      | 152     | 186 | -0.38 | 4   |
| 1637   | Malotilate            | Hepatic Protectant | 59937-28-9  |      | 61      | 288 | 3.48  | 4   |
| 1638   | Mandelic Acid         | Dermatologic       | 90-64-2     |      | 133     | 152 | 0.55  | 3   |
| 1639   | Manidipine 6300       | Vasodilator        | 89226-50-6  |      | 125     | 611 | 5.66  | 10  |
| 1640   | Mannitol Hexanitrate  | Vasodilator        | 15825-70-4  |      | 107     | 452 | 4.18  | 24  |
| 1641   | Mannomustine          | Antineoplastic     | 576-68-1    |      | 278     | 305 | 0.00  | 6   |
| 1642   | Mannosulfan           | Antineoplastic     | 7518-35-6   |      | 115     | 495 | 0.43  | 14  |
| 1643   | Maprotiline           | Antidepressant     | 10262-69-8  | Y    | 93      | 277 | 4.36  | 1   |
| 1644   | Maraviroc             | Antiviral          | 376348-65-1 | Y    | 194     | 514 | 5.30  | 6   |
| 1645   | Marbofloxacin         | Antibiotic         | 115550-35-1 |      | 268     | 362 | -0.64 | 8   |
| 1646   | Mavacoxib             | Antiinflammatory   | 170569-88-7 |      | 185     | 385 | 3.52  | 5   |
| 1647   | Maxacalcitol          | Dermatologic       | 103909-75-7 |      | 122     | 419 | 4.03  | 4   |
| 1648   | Maytansine            | Antineoplastic     | 35846-53-8  |      | 171     | 692 | 3.63  | 13  |
| 1649   | Mazindol              | Anorexic           | 22232-71-9  | Y    | 198     | 285 | 2.36  | 3   |
| 1650   | Mazipredone           | Antiinflammatory   | 13085-08-0  |      | 199     | 443 | 2.17  | 6   |
| 1651   | Mebazazine            | Antipsychotic      | 65-64-5     |      | 169     | 136 | 0.67  | 2   |
| 1652   | Mebendazole           | Anthelmintic       | 31431-39-7  | Y    | 289     | 295 | 2.83  | 6   |
| 1653   | Mebeverine            | Antispasmodic      | 3625-06-7   | Y    | 129     | 430 | 5.77  | 6   |
| 1654   | Mebezonium Iodide     | Antitussive        | 7681-78-9   |      | 260     | 550 |       |     |
| 1655   | Mebhydrolin           | Antihistaminic     | 524-81-2    |      | 95      | 276 | 3.81  | 2   |
| 1656   | Mebutamate            | Antihypertensive   | 64-55-1     |      | 77      | 232 | 1.05  | 6   |
| 1657   | Mebutizide            | Diuretic           | 3568-00-1   |      | 220     | 382 | 2.51  | 7   |
| 1658   | Mecarbinat            | Antihypertensive   | 15574-49-9  |      | 197     | 233 | 2.89  | 4   |
| 1659   | Meclofenamic Acid     | Antiinflammatory   | 644-62-2    |      | 257     | 296 | 5.44  | 3   |
| 1660   | Meclofenoxate         | Nootropic          | 51-68-3     |      | 138     | 258 | 1.63  | 4   |
| 1661   | Mecloqualone          | Sedative           | 340-57-8    |      | 126     | 271 | 2.83  | 3   |
| 1662   | Mecloralurea          | Anxiolytic         | 1954-79-6   |      | 135     | 221 | 0.26  | 4   |
| 1663   | Medazepam             | Sedative           | 2898-12-6   | Y    | 99      | 271 | 3.89  | 2   |

| Number | Common Name                    | Indication                    | CAS Number | Oral | MP (°C) | MW  | ClogP | HBA |
|--------|--------------------------------|-------------------------------|------------|------|---------|-----|-------|-----|
| 1664   | Medazomide                     | Antitussive                   | 300-22-1   |      | 170     | 155 | -1.59 | 5   |
| 1665   | Medifoxamine                   | Antidepressant                | 32359-34-5 |      | 138     | 257 | 2.52  | 3   |
| 1666   | Medrogestone                   | Progestogen                   | 977-79-7   |      | 114     | 341 | 4.35  | 2   |
| 1667   | Medroxyprogesterone<br>Acetate | Progestogen                   | 71-58-9    | Y    | 206     | 387 | 4.17  | 4   |
| 1668   | Medrysone                      | Glucocorticoid                | 2668-66-8  |      | 157     | 344 | 3.10  | 3   |
| 1669   | Mefenamic Acid                 | Antiinflammatory              | 61-68-7    | Y    | 230     | 241 | 4.83  | 3   |
| 1670   | Mefenidramium<br>Metilsulfate  | Unclassified                  | 4858-60-0  |      | 135     | 381 |       |     |
| 1671   | Mefeserpine                    | Antihypertensive              | 3735-85-1  |      | 216     | 579 | 3.55  | 10  |
| 1672   | Mefruside                      | Diuretic                      | 7195-27-9  |      | 148     | 383 | 1.79  | 7   |
| 1673   | Megestrol Acetate              | Progestogen                   | 595-33-5   | Y    | 214     | 385 | 3.75  | 4   |
| 1674   | Meglumine                      | Antiprotozoal                 | 6284-40-8  | Y    | 129     | 195 | -2.51 | 6   |
| 1675   | Meglumine Metrizoate           | Antiprotozoal                 | 1949-45-7  |      | 275     | 628 | 1.48  | 6   |
| 1676   | Meglutol                       | Antihyperlipidemic            | 503-49-1   |      | 109     | 162 | -1.01 | 5   |
| 1677   | Melengestrol Acetate           | Antineoplastic                | 2919-66-6  |      | 224     | 397 | 3.35  | 4   |
| 1678   | Meloxicam                      | Antiinflammatory              | 71125-38-7 | Y    | 260     | 351 | 2.66  | 7   |
| 1679   | Melphalan                      | Antineoplastic                | 148-82-3   | Y    | 183     | 305 | 0.54  | 4   |
| 1680   | Memantine                      | Antiparkinsonian              | 19982-08-2 | Y    | 258     | 179 | 3.00  | 1   |
| 1681   | Menbutone                      | Choleric                      | 3562-99-0  |      | 173     | 258 | 2.57  | 4   |
| 1682   | Menitrazepam                   | Sedative                      | 28781-64-8 |      | 157     | 299 | 2.28  | 6   |
| 1683   | Menoctone                      | Antimalarial                  | 14561-42-3 |      | 77      | 369 | 8.36  | 3   |
| 1684   | Menogaril                      | Antineoplastic                | 71628-96-1 |      | 250     | 542 | 3.16  | 11  |
| 1685   | Meobentine Sulfate             | Antiarrhythmic                | 46464-11-3 |      | 273     | 207 | 1.62  | 4   |
| 1686   | Meparfynol                     | Sedative                      | 77-75-8    |      | 31      | 98  | 0.89  | 1   |
| 1687   | Mepazine Acetate               | Antipsychotic                 | 60-89-9    |      | 199     | 310 | 5.04  | 2   |
| 1688   | Meperidine                     | Analgesic                     | 57-42-1    | Y    | 186     | 247 | 2.19  | 3   |
| 1689   | Mephenesin                     | Muscle Relaxant<br>(Skeletal) | 59-47-2    |      | 69      | 182 | 1.47  | 3   |
| 1690   | Mephenesin Carbamate           | Muscle Relaxant<br>(Skeletal) | 533-06-2   |      | 93      | 225 | 1.42  | 5   |
| 1691   | Mephenoxalone                  | Muscle Relaxant<br>(Skeletal) | 70-07-5    |      | 144     | 223 | -0.52 | 5   |
| 1692   | Mephenytoin                    | Anticonvulsant                | 50-12-4    | Y    | 136     | 218 | 1.44  | 4   |
| 1693   | Mephobarbital                  | Anticonvulsant                | 115-38-8   | Y    | 176     | 246 | 1.23  | 5   |
| 1694   | Mepindolol                     | Antianginal                   | 23694-81-7 | Y    | 95      | 262 | 2.30  | 4   |
| 1695   | Mepiprazole                    | Sedative                      | 20326-12-9 |      | 106     | 305 | 2.41  | 4   |
| 1696   | Mepiroxol                      | Antiinflammatory              | 6968-72-5  |      | 93      | 125 | -1.89 | 3   |
| 1697   | Mepitostane                    | Oxytocic                      | 21362-69-6 |      | 98      | 405 | 6.89  | 2   |
| 1698   | Mepivacaine                    | Anesthetic                    | 96-88-8    |      | 151     | 246 | 1.78  | 3   |
| 1699   | Mepixanox                      | Respiratory Stimulant         | 17854-59-0 |      | 150     | 323 | 1.78  | 4   |
| 1700   | Mepramidil                     | Antihypertensive              | 23891-60-3 |      | 160     | 464 | 4.59  | 6   |
| 1701   | Meprednisone                   | Glucocorticoid                | 1247-42-3  |      | 200     | 372 | 2.10  | 5   |

| Number | Common Name            | Indication                    | CAS Number | Oral | MP (°C) | MW  | ClogP | HBA |
|--------|------------------------|-------------------------------|------------|------|---------|-----|-------|-----|
| 1702   | Meprobamate            | Sedative                      | 57-53-4    |      | 105     | 218 | 0.70  | 6   |
| 1703   | Meproscillarin         | Cardiotonic                   | 33396-37-1 |      | 213     | 545 | 1.53  | 8   |
| 1704   | Meproxitol             | Antitussive                   | 4295-63-0  |      | 117     | 329 | 3.89  | 3   |
| 1705   | Meptazinol             | Analgesic                     | 54340-58-8 | Y    | 127     | 233 | 3.40  | 2   |
| 1706   | Mequidox               | Antibacterial                 | 16915-79-0 |      | 180     | 206 | -2.36 | 5   |
| 1707   | Mequinol               | Dermatologic                  | 150-76-5   |      | 54      | 124 | 1.36  | 2   |
| 1708   | Mequitazine            | Antihistaminic                | 29216-28-2 | Y    | 131     | 322 | 5.20  | 2   |
| 1709   | Merafloxacin           | Antibiotic                    | 91188-00-0 |      | 200     | 379 | 3.41  | 6   |
| 1710   | Mercaptopurine         | Antineoplastic                | 50-44-2    | Y    | 324     | 152 | -0.30 | 4   |
| 1711   | Mesalamine             | Antiinflammatory              | 89-57-6    | Y    | 280     | 153 | 0.74  | 4   |
| 1712   | Meseclazone            | Antiinflammatory              | 29053-27-8 |      | 147     | 240 | 2.43  | 4   |
| 1713   | Mesoridazine           | Antipsychotic                 | 5588-33-0  |      | 130     | 387 | 3.16  | 3   |
| 1714   | Mestanolone            | Androgen                      | 521-11-9   |      | 192     | 304 | 4.31  | 2   |
| 1715   | Mesterolone            | Androgen                      | 1424-00-6  | Y    | 204     | 304 | 4.47  | 2   |
| 1716   | Mestranol              | Estrogen                      | 72-33-3    |      | 151     | 310 | 4.94  | 2   |
| 1717   | Mesulfen               | Ectoparasiticide              | 135-58-0   |      | 123     | 244 | 5.50  | 0   |
| 1718   | Metacetamol            | Analgesic                     | 621-42-1   |      | 149     | 151 | 0.69  | 3   |
| 1719   | Metahexamide           | Antidiabetic                  | 565-33-3   |      | 151     | 311 | 1.47  | 6   |
| 1720   | Metamelfalan           | Antineoplastic                | 1088-80-8  |      | 181     | 305 | 1.05  | 4   |
| 1721   | Metamfazone            | Antiinflammatory              | 54063-49-9 |      | 169     | 201 | 0.36  | 4   |
| 1722   | Metanixin              | Antiinflammatory              | 4394-04-1  |      | 219     | 242 | 4.33  | 4   |
| 1723   | Metapramine            | Antidepressant                | 21730-16-5 |      | 237     | 238 | 2.99  | 2   |
| 1724   | Metaproterenol         | Bronchodilator                | 586-06-1   |      | 100     | 211 | 0.29  | 4   |
| 1725   | Metaterol              | Bronchodilator                | 3571-71-9  |      | 124     | 195 | 0.98  | 3   |
| 1726   | Metaxalone             | Muscle Relaxant<br>(Skeletal) | 1665-48-1  | Y    | 122     | 221 | 1.18  | 4   |
| 1727   | Metazamide             | Antibacterial                 | 14058-90-3 |      | 195     | 204 | 1.55  | 4   |
| 1728   | Metazocine             | Analgesic                     | 3734-52-9  |      | 234     | 231 | 2.62  | 2   |
| 1729   | Metbufen               | Antiinflammatory              | 63472-04-8 |      | 219     | 268 | 3.48  | 3   |
| 1730   | Metergoline            | Pituitary                     | 17692-51-2 | Y    | 146     | 404 | 3.80  | 5   |
| 1731   | Metergotamine          | Analgesic                     | 22336-84-1 |      | 185     | 596 | 6.19  | 10  |
| 1732   | Metesculetol           | Unclassified                  | 52814-39-8 |      | 124     | 250 | 1.19  | 6   |
| 1733   | Metformin              | Antidiabetic                  | 657-24-9   | Y    | 231     | 129 | -1.25 | 5   |
| 1734   | Methacholine           | Cholinergic                   | 55-92-5    |      | 149     | 160 |       |     |
| 1735   | Methacycline           | Antibiotic                    | 914-00-1   |      | 205     | 442 | 1.35  | 10  |
| 1736   | Methadone              | Analgesic                     | 76-99-3    | Y    | 100     | 309 | 3.93  | 2   |
| 1737   | Methafurylene Fumarate | Antihistaminic                | 531-06-6   |      | 142     | 245 | 1.80  | 4   |
| 1738   | Methallatal            | Antiemetic                    | 115-56-0   |      | 161     | 226 | 1.86  | 4   |
| 1739   | Methallenestril        | Estrogen                      | 517-18-0   |      | 140     | 286 | 3.91  | 3   |
| 1740   | Methallibure           | Pituitary                     | 926-93-2   |      | 198     | 218 | 1.32  | 4   |
| 1741   | Methalthiazide         | Diuretic                      | 5611-64-3  |      | 169     | 398 | 1.89  | 7   |
| 1742   | Methamphetamine        | Anorexic                      | 537-46-2   | Y    | 170     | 149 | 2.20  | 1   |
| 1743   | Methandriol            | Steroid                       | 521-10-8   |      | 206     | 304 | 4.33  | 2   |

| Number | Common Name                            | Indication                    | CAS Number | Oral | MP (°C) | MW  | ClogP | HBA |
|--------|----------------------------------------|-------------------------------|------------|------|---------|-----|-------|-----|
| 1744   | Methandrostenolone                     | Androgen                      | 72-63-9    |      | 166     | 300 | 3.47  | 2   |
| 1745   | Methaqualone                           | Sedative                      | 72-44-6    |      | 120     | 250 | 2.50  | 3   |
| 1746   | Metharbital                            | Anticonvulsant                | 50-11-3    |      | 155     | 198 | 1.51  | 5   |
| 1747   | Methastyrindone                        | Antipsychotic                 | 721-19-7   |      | 148     | 217 | 2.66  | 3   |
| 1748   | Methazolamide                          | Diuretic                      | 554-57-4   |      | 214     | 236 | 0.13  | 7   |
| 1749   | Methdilazine                           | Dermatologic                  | 1982-37-2  |      | 87      | 296 | 4.64  | 2   |
| 1750   | Methenamine                            | Antibacterial                 | 100-97-0   |      | 117     | 140 | -0.17 | 4   |
| 1751   | Methenolone Acetate                    | Steroid                       | 434-05-9   |      | 140     | 344 | 4.68  | 3   |
| 1752   | Methenolone Enanthate                  | Steroid                       | 303-42-4   |      | 70      | 415 | 7.23  | 2   |
| 1753   | Methestrol                             | Estrogen                      | 130-73-4   |      | 145     | 298 | 6.14  | 2   |
| 1754   | Methetoin                              | Anticonvulsant                | 5696-06-0  |      | 210     | 218 | 1.35  | 4   |
| 1755   | Methimazole                            | Thyroid                       | 60-56-0    | Y    | 146     | 114 | -0.34 | 2   |
| 1756   | Methionine                             | Hepatoprotectant              | 63-68-3    |      | 273     | 149 | 0.22  | 3   |
| 1757   | Methisazone                            | Antiviral                     | 1910-68-5  |      | 257     | 234 | 1.23  | 5   |
| 1758   | Methitural                             | Sedative                      | 467-43-6   |      | 79      | 288 | 2.86  | 4   |
| 1759   | Methixene                              | Muscle Relaxant<br>(Skeletal) | 4969-02-2  | Y    | 66      | 309 | 5.66  | 1   |
| 1760   | Methocarbamol                          | Muscle Relaxant<br>(Skeletal) | 532-03-6   | Y    | 96      | 241 | 0.40  | 6   |
| 1761   | Methohexital                           | Anesthetic                    | 151-83-7   |      | 58      | 262 | 2.01  | 5   |
| 1762   | Methopoline                            | Analgesic                     | 2154-02-1  |      | 111     | 346 | 3.67  | 3   |
| 1763   | Methoserpidine                         | Antihypertensive              | 865-04-3   |      | 171     | 609 | 4.73  | 11  |
| 1764   | Methotrexate                           | Antineoplastic                | 59-05-2    | Y    | 195     | 454 | -0.45 | 13  |
| 1765   | Methoxamine                            | Antihypertensive              | 390-28-3   |      | 85      | 211 | 0.61  | 4   |
| 1766   | Methoxsalen                            | Dermatologic                  | 298-81-7   | Y    | 148     | 216 | 1.52  | 4   |
| 1767   | Methoxypromazine<br>Maleate            | Antipsychotic                 | 61-01-8    |      | 46      | 314 | 4.59  | 3   |
| 1768   | Methsuximide                           | Anticonvulsant                | 77-41-8    | Y    | 53      | 203 | 0.42  | 3   |
| 1769   | Methyclothiazide                       | Diuretic                      | 135-07-9   | Y    | 225     | 360 | 1.42  | 7   |
| 1770   | Methyl Nicotinate                      | Dermatologic                  | 93-60-7    |      | 39      | 137 | 0.79  | 3   |
| 1771   | Methyl Palmoxirate                     | Antidiabetic                  | 69207-52-9 |      | 44      | 298 | 6.24  | 3   |
| 1772   | Methyl Salicylate                      | Dermatologic                  | 119-36-8   |      | 40      | 152 | 2.52  | 3   |
| 1773   | Methylatropine Nitrate                 | Mydriatic                     | 52-88-0    |      | 163     | 366 |       |     |
| 1774   | Methylchromone                         | Antispasmodic                 | 85-90-5    |      | 68      | 160 | 1.43  | 2   |
| 1775   | Methylidesorphine                      | Analgesic                     | 16008-36-9 |      | 239     | 283 | 1.41  | 3   |
| 1776   | Methyldihydromorphine                  | Analgesic                     | 509-56-8   |      | 210     | 301 | 0.47  | 4   |
| 1777   | Methyldopa                             | Antihypertensive              | 555-30-6   |      | 300     | 211 | -0.74 | 5   |
| 1778   | Methylene Blue                         | Hemantic                      | 61-73-4    |      | 78      | 320 |       |     |
| 1779   | Methylephedrine                        | Nootropic                     | 552-79-4   |      | 88      | 179 | 1.62  | 2   |
| 1780   | Methylegonovine                        | Oxytocic                      | 113-42-8   | Y    | 172     | 339 | 2.99  | 5   |
| 1781   | Methylmethionine<br>Sulfonium Chloride | Unclassified                  | 1115-84-0  |      | 135     | 200 |       |     |
| 1782   | Methylphenidate                        | Nootropic                     | 113-45-1   | Y    | 74      | 233 | 2.31  | 3   |

| Number | Common Name                   | Indication                    | CAS Number | Oral | MP (°C) | MW  | ClogP | HBA |
|--------|-------------------------------|-------------------------------|------------|------|---------|-----|-------|-----|
| 1783   | Methylprednisolone            | Glucocorticoid                | 83-43-2    | Y    | 240     | 374 |       | 5   |
| 1784   | Methylprednisolone<br>Acetate | Glucocorticoid                | 53-36-1    | Y    | 205     | 417 | 2.79  | 6   |
| 1785   | Methyltestosterone            | Androgen                      | 58-18-4    | Y    | 163     | 302 | 3.56  | 2   |
| 1786   | Methyprylon                   | Sedative                      | 125-64-4   |      | 80      | 183 | 0.65  | 3   |
| 1787   | Methysergide                  | Antimigraine                  | 361-37-5   | Y    | 195     | 353 | 1.81  | 5   |
| 1788   | Metiapine                     | Antipsychotic                 | 5800-19-1  |      | 103     | 323 | 3.87  | 3   |
| 1789   | Metiazinic Acid               | Antiinflammatory              | 13993-65-2 |      | 145     | 271 | 3.56  | 3   |
| 1790   | Meticrane                     | Diuretic                      | 1084-65-7  |      | 237     | 275 | 1.27  | 5   |
| 1791   | Metindizate                   | Antispasmodic                 | 15687-33-9 |      | 91      | 394 | 4.73  | 4   |
| 1792   | Metipranolol                  | Antihypertensive              | 22664-55-7 |      | 108     | 309 | 2.28  | 5   |
| 1793   | Metitepine                    | Antipsychotic                 | 20229-30-5 |      | 81      | 357 | 3.80  | 2   |
| 1794   | Metizoline                    | Adrenergic                    | 17692-22-7 |      | 157     | 230 | 3.06  | 2   |
| 1795   | Metochalcone                  | Choleretic                    | 18493-30-6 |      | 92      | 298 | 3.42  | 4   |
| 1796   | Metoclopramide                | Antiemetic                    | 364-62-5   | Y    | 147     | 300 | 2.16  | 5   |
| 1797   | Metocurine Iodide             | Muscle Relaxant<br>(Skeletal) | 7601-55-0  |      | 262     | 907 |       |     |
| 1798   | Metolazone                    | Diuretic                      | 17560-51-9 | Y    | 253     | 366 | 3.16  | 6   |
| 1799   | Metopimazine                  | Antiemetic                    | 14008-44-7 |      | 169     | 446 | 3.33  | 6   |
| 1800   | Metopon                       | Analgesic                     | 143-52-2   |      | 244     | 299 | 2.41  | 4   |
| 1801   | Metoprine                     | Antineoplastic                | 7761-45-7  |      | 276     | 269 | 2.77  | 4   |
| 1802   | Metoprolol                    | Antihypertensive              | 51384-51-1 | Y    | 35      | 267 | 1.63  | 4   |
| 1803   | Metoquizine                   | Mydriatic                     | 7125-67-9  |      | 200     | 377 | 2.23  | 6   |
| 1804   | Metoserpate                   | Sedative                      | 1178-28-5  |      | 235     | 429 | 1.83  | 7   |
| 1805   | Metralindole                  | Antidepressant                | 54188-38-4 |      | 165     | 255 | 2.09  | 4   |
| 1806   | Metrazifone                   | Nootropic                     | 68289-14-5 |      | 210     | 349 | 2.77  | 6   |
| 1807   | Metrenperone                  | Steroid                       | 81043-56-3 |      | 176     | 407 | 3.49  | 5   |
| 1808   | Metribolone                   | Steroid                       | 965-93-5   |      | 168     | 284 | 3.55  | 2   |
| 1809   | Metrifonate                   | Anthelmintic                  | 52-68-6    |      | 81      | 257 | 0.49  | 4   |
| 1810   | Metrifudil                    | Antiseizure                   | 23707-33-7 |      | 175     | 371 | 1.22  | 9   |
| 1811   | Metronidazole                 | Antiprotozoal                 | 443-48-1   | Y    | 158     | 171 | -0.14 | 6   |
| 1812   | Meturedopa                    | Antineoplastic                | 661-29-6   |      | 339     | 275 | -0.23 |     |
| 1813   | Metyrosine                    | Antineoplastic                | 672-87-7   | Y    | 315     | 195 | 2.29  | 4   |
| 1814   | Mevastatin                    | Antihyperlipidemic            | 73573-88-3 |      | 150     | 391 | 3.78  | 5   |
| 1815   | Mexazolam                     | Anxiolytic                    | 31868-18-5 |      | 174     | 363 | 1.41  | 4   |
| 1816   | Mexenone                      | Dermatologic                  | 1641-17-4  |      | 95      | 242 | 4.66  | 3   |
| 1817   | Mexiletine                    | Antiarrhythmic                | 31828-71-4 | Y    | 204     | 179 | 2.12  | 2   |
| 1818   | Mezacopride                   | Antiemetic                    | 89613-77-4 |      | 146     | 324 | 2.28  | 5   |
| 1819   | Mezilamine                    | Antidepressant                | 50335-55-2 |      | 122     | 288 | 1.77  | 5   |
| 1820   | Mibolerone                    | Androgen                      | 3704-09-4  |      | 178     | 302 | 3.81  | 2   |
| 1821   | Miconazole                    | Antifungal                    | 22916-47-8 |      | 185     | 416 | 4.97  | 3   |
| 1822   | Micronomicin                  | Antibiotic                    | 52093-21-7 |      | 260     | 464 | -2.39 | 12  |
| 1823   | Midaflur                      | Sedative                      | 23757-42-8 |      | 159     | 357 | 3.35  | 3   |

| Number | Common Name        | Indication          | CAS Number  | Oral | MP (°C) | MW  | ClogP | HBA |
|--------|--------------------|---------------------|-------------|------|---------|-----|-------|-----|
| 1824   | Midaglizole        | Antihypertensive    | 66529-17-7  |      | 121     | 251 | 2.09  | 3   |
| 1825   | Midazolam          | Anesthetic          | 59467-70-8  |      | 156     | 326 | 3.80  | 3   |
| 1826   | Midecamycin        | Antibiotic          | 35457-80-8  |      | 156     | 814 | 4.38  | 16  |
| 1827   | Mifepristone       | Abortifacient       | 84371-65-3  |      | 150     | 430 | 6.19  | 3   |
| 1828   | Migalastat         | Antihypertensive    | 108147-54-2 | Y    | 244     | 163 | -1.18 | 5   |
| 1829   | Migliitol          | Antidiabetic        | 72432-03-2  | Y    | 114     | 207 | -2.21 | 6   |
| 1830   | Miloxacin          | Antibiotic          | 37065-29-5  |      | 264     | 263 | -0.62 | 7   |
| 1831   | Miltefosine        | Antineoplastic      | 58066-85-6  | Y    | 229     | 408 |       |     |
| 1832   | Mimbane            | Analgesic           | 3277-59-6   |      | 233     | 294 | 4.30  | 2   |
| 1833   | Minalrestat        | Antidiabetic        | 129688-50-2 |      | 232     | 449 | 1.38  | 6   |
| 1834   | Minaprine          | Antidepressant      | 25905-77-5  |      | 122     | 298 | 2.04  | 5   |
| 1835   | Minoxidil          | Antihypertensive    | 38304-91-5  |      | 256     | 209 | 1.62  | 6   |
| 1836   | Mipimazole         | Antibiotic          | 20406-60-4  |      | 157     | 144 | 0.26  | 2   |
| 1837   | Mirfentanil        | Analgesic           | 117523-47-4 |      | 207     | 376 | 3.77  | 6   |
| 1838   | Mirtazapine        | Antidepressant      | 85650-52-8  | Y    | 115     | 265 | 0.89  | 3   |
| 1839   | Misonidazole       | Antiprotozoal       | 13551-87-6  |      | 111     | 201 | -0.41 | 7   |
| 1840   | Mitobronitol       | Antineoplastic      | 488-41-5    |      | 177     | 308 | -0.23 | 4   |
| 1841   | Mitoflaxone        | Antineoplastic      | 87626-55-9  |      | 234     | 280 | 3.16  | 4   |
| 1842   | Mitoguazone        | Antineoplastic      | 459-86-9    |      | 225     | 184 | -1.52 | 8   |
| 1843   | Mitolactol         | Antineoplastic      | 10318-26-0  |      | 180     | 308 | -0.23 | 4   |
| 1844   | Mitonafide         | Antineoplastic      | 54824-17-8  |      | 139     | 313 | 1.11  | 7   |
| 1845   | Mitopodozide       | Antineoplastic      | 1508-45-8   |      | 110     | 475 | 1.06  | 10  |
| 1846   | Mitotane           | Antineoplastic      | 53-19-0     | Y    | 76      | 320 | 5.41  | 0   |
| 1847   | Mitoxantrone       | Antineoplastic      | 65271-80-9  |      | 162     | 444 | 1.55  | 10  |
| 1848   | Moclobemide        | Antidepressant      | 71320-77-9  | Y    | 137     | 269 | 1.34  | 4   |
| 1849   | Modafinil          | Nootropic           | 68693-11-8  | Y    | 162     | 273 | 1.18  | 3   |
| 1850   | Mofebutazone       | Antiinflammatory    | 2210-63-1   |      | 103     | 232 | 2.26  | 4   |
| 1851   | Mofezolac          | Antiinflammatory    | 78967-07-4  | Y    | 137     | 339 | 3.74  | 6   |
| 1852   | Molinazone         | Analgesic           | 5581-46-4   |      | 200     | 232 | 0.43  | 6   |
| 1853   | Molindone          | Antipsychotic       | 7416-34-4   | Y    | 181     | 276 | -1.32 | 4   |
| 1854   | Molsidomine        | Antianginal         | 25717-80-0  | Y    | 141     | 242 |       |     |
| 1855   | Mometasone Furoate | Steroid             | 83919-23-7  |      | 219     | 521 | 3.59  | 6   |
| 1856   | Monatepil Maleate  | Antianginal         | 103377-41-9 |      | 194     | 476 | 4.02  | 4   |
| 1857   | Monensin           | Antibiotic          | 17090-79-8  |      | 104     | 671 | 4.01  | 11  |
| 1858   | Monobenzone        | Dermatologic        | 103-16-2    |      | 121     | 200 | 2.65  | 2   |
| 1859   | Monoctanoin        | Anticholelithogenic | 502-54-5    |      | 38      | 218 | 1.99  | 4   |
| 1860   | Montelukast        | Bronchodilator      | 158966-92-8 | Y    | 147     | 586 | 5.81  | 4   |
| 1861   | Moperone           | Antipsychotic       | 1050-79-9   |      | 119     | 355 | 3.42  | 3   |
| 1862   | Mopidamol          | Antineoplastic      | 13665-88-8  |      | 158     | 421 | 1.26  | 11  |
| 1863   | Moprolol           | Antihypertensive    | 5741-22-0   |      | 83      | 239 | 1.62  | 4   |
| 1864   | Moquizone          | Choleretic          | 19395-58-5  |      | 129     | 351 | 3.36  | 6   |
| 1865   | Morantel Tartrate  | Anthelmintic        | 20574-50-9  |      | 240     | 220 | 2.43  | 2   |
| 1866   | Morazone           | Analgesic           | 6536-18-1   |      | 138     | 377 | 1.92  | 5   |

| Number | Common Name                                              | Indication         | CAS Number  | Oral | MP (°C) | MW  | ClogP | HBA |
|--------|----------------------------------------------------------|--------------------|-------------|------|---------|-----|-------|-----|
| 1867   | Morclofone                                               | Antitussive        | 31848-01-8  |      | 92      | 406 | 2.55  | 6   |
| 1868   | Moricizine                                               | Antiarrhythmic     | 31883-05-3  | Y    | 157     | 428 | 2.36  | 7   |
| 1869   | Morinamide                                               | Antibacterial      | 952-54-5    |      | 119     | 222 | 0.59  | 6   |
| 1870   | Moroxydine                                               | Antiviral          | 3731-59-7   |      | 182     | 171 | -1.84 | 6   |
| 1871   | Morphine                                                 | Analgesic          | 57-27-2     | Y    | 248     | 285 | 0.87  | 4   |
| 1872   | Morsuximide                                              | Anticonvulsant     | 3780-72-1   |      | 69      | 288 | 0.69  | 5   |
| 1873   | Mosapride                                                | Gastroprokinetic   | 112885-41-3 | Y    | 152     | 422 | 2.94  | 6   |
| 1874   | Motretinide                                              | Dermatologic       | 56281-36-8  |      | 180     | 354 | 5.78  | 3   |
| 1875   | Moveltipril                                              | Antihypertensive   | 85856-54-8  |      | 115     | 399 | 2.39  | 7   |
| 1876   | Moxalactam                                               | Antibiotic         | 64952-97-2  |      | 120     | 520 | -2.56 | 15  |
| 1877   | Moxastine                                                | Antihistaminic     | 3572-74-5   |      | 131     | 269 | 3.41  | 2   |
| 1878   | Moxaverine                                               | Antispasmodic      | 10539-19-2  |      | 79      | 307 | 4.37  | 3   |
| 1879   | Moxestrol                                                | Estrogen           | 34816-55-2  |      | 280     | 326 | 3.31  | 3   |
| 1880   | Moxicoumone                                              | Unclassified       | 17692-56-7  |      | 132     | 418 | 1.64  | 8   |
| 1881   | Moxifloxacin                                             | Antibiotic         | 151096-09-2 | Y    | 240     | 401 | 2.83  | 7   |
| 1882   | Moxisylyte                                               | Vasodilator        | 54-32-0     | Y    | 145     | 279 | 3.17  | 4   |
| 1883   | Moxonidine                                               | Antihypertensive   | 75438-57-2  |      | 218     | 242 | 0.33  | 6   |
| 1884   | Mupirocin                                                | Antibacterial      | 12650-69-0  |      | 77      | 501 | 2.24  | 9   |
| 1885   | Muraglitazar                                             | Antidiabetic       | 331741-94-7 |      | 140     | 517 | 4.44  | 9   |
| 1886   | Murocainide                                              | Antiarrhythmic     | 66203-94-9  |      | 120     | 377 | 1.28  | 8   |
| 1887   | Muzolimine                                               | Diuretic           | 55294-15-0  |      | 128     | 272 | 2.10  | 4   |
| 1888   | Mycophenolic Acid                                        | Immunomodulator    | 24280-93-1  |      | 140     | 320 | 3.84  | 6   |
| 1889   | Myrophine                                                | Analgesic          | 467-18-5    |      | 41      | 586 | 9.49  | 5   |
| 1890   | N (Acyl Colamino Formyl<br>Methyl)Pyridinium<br>Chloride | Unclassified       | 6272-74-8   |      | 143     | 399 |       |     |
| 1891   | N,N Dimethyl P Toluidine                                 | Unclassified       | 99-97-8     |      | 172     | 135 | 2.29  | 1   |
| 1892   | Nabilone                                                 | Antiemetic         | 51022-71-0  | Y    | 160     | 373 | 7.25  | 3   |
| 1893   | Nabumetone                                               | Antiinflammatory   | 42924-53-8  | Y    | 80      | 228 | 3.14  | 2   |
| 1894   | Nadide                                                   | Antidote           | 53-84-9     |      | 141     | 663 |       |     |
| 1895   | Nadifloxacin                                             | Antibiotic         | 124858-35-1 |      | 246     | 360 | 2.49  | 6   |
| 1896   | Nadolol                                                  | Antihypertensive   | 42200-33-9  | Y    | 130     | 309 | 0.56  | 5   |
| 1897   | Naepaine                                                 | Anesthetic         | 2188-67-2   |      | 66      | 250 | 2.56  | 4   |
| 1898   | Nafcaproic Acid                                          | Hemostatic         | 1085-91-2   |      | 201     | 242 | 4.31  | 2   |
| 1899   | Nafenopin                                                | Antihyperlipidemic | 3771-19-5   |      | 125     | 310 | 4.63  | 3   |
| 1900   | Naftalofos                                               | Anthelminithic     | 1491-41-4   |      | 177     | 349 | 2.53  | 7   |
| 1901   | Naftopidil                                               | Antihypertensive   | 57149-07-2  | Y    | 127     | 392 | 3.25  | 5   |
| 1902   | Naftypramide                                             | Antiemetic         | 1505-95-9   |      | 134     | 298 | 3.10  | 3   |
| 1903   | Nalbuphine                                               | Analgesic          | 20594-83-6  | Y    | 230     | 357 | 1.22  | 5   |
| 1904   | Nalidixic Acid                                           | Antibiotic         | 389-08-2    |      | 229     | 232 | 0.03  | 5   |
| 1905   | Nalmefene                                                | Antidote           | 55096-26-9  |      | 189     | 339 | 1.63  | 4   |
| 1906   | Nalorphine                                               | Antidote           | 62-67-9     |      | 207     | 311 | 1.59  | 4   |
| 1907   | Naloxone                                                 | Antidote           | 465-65-6    | Y    | 179     | 327 | 1.78  | 5   |

| Number | Common Name         | Indication                | CAS Number  | Oral | MP (°C) | MW  | ClogP | HBA |
|--------|---------------------|---------------------------|-------------|------|---------|-----|-------|-----|
| 1908   | Naltrexone          | Antidote                  | 16590-41-3  |      | 172     | 341 | 2.05  | 5   |
| 1909   | Nandrolone          | Androgen                  | 62-90-8     |      | 95      | 407 | 6.01  | 3   |
|        | Phenpropionate      |                           |             |      |         |     |       |     |
| 1910   | Nanterinone         | Vasodilator               | 102791-47-9 |      | 324     | 253 | 2.76  | 4   |
| 1911   | Naphazoline         | Decongestant              | 835-31-4    |      | 125     | 210 | 2.99  | 2   |
| 1912   | Naphthalene         | Anthelmintic              | 91-20-3     |      | 80      | 128 | 3.36  | 0   |
| 1913   | Naphthonone         | Unclassified              | 7114-11-6   |      | 139     | 240 | 3.80  | 2   |
| 1914   | Naproxen            | Antiinflammatory          | 22204-53-1  | Y    | 155     | 230 | 2.88  | 3   |
| 1915   | Naproxol            | Antiinflammatory          | 26159-36-4  |      | 90      | 216 | 3.04  | 2   |
| 1916   | Naranol             | Antipsychotic             | 22292-91-7  |      | 166     | 283 | 3.70  | 3   |
| 1917   | Narasin             | Antibacterial             | 55134-13-9  |      | 99      | 765 | 6.13  | 11  |
| 1918   | Naratriptan         | Antimigraine              | 121679-13-8 | Y    | 171     | 335 | 1.15  | 5   |
| 1919   | Narceine            | Analgesic                 | 131-28-2    |      | 145     | 445 | 1.90  | 9   |
| 1920   | Naringin            | Antiinflammatory          | 10236-47-2  |      | 170     | 581 | -0.20 | 14  |
| 1921   | Naroparcil          | Antithrombotic            | 120819-70-7 |      | 164     | 387 | 2.91  | 5   |
| 1922   | Natamycin           | Antifungal                | 7681-93-8   |      | 290     | 666 | 0.88  | 14  |
| 1923   | Nateglinide         | Antidiabetic              | 105816-04-4 | Y    | 130     | 317 | 2.35  | 4   |
| 1924   | Navuridine          | Antiviral                 | 84472-85-5  |      | 167     | 253 |       |     |
| 1925   | Nealbarbital        | Sedative                  | 561-83-1    |      | 156     | 238 | 2.20  | 5   |
| 1926   | Nebidrazine         | Anorexic                  | 55248-23-2  |      | 199     | 271 | 1.79  | 6   |
| 1927   | Nedocromil          | Antihistaminic            | 69049-73-6  |      | 299     | 371 | 1.30  | 8   |
| 1928   | Nefazodone          | Antidepressant            | 83366-66-9  |      | 83      | 470 | 4.09  | 7   |
| 1929   | Nefiracetam         | Nootropic                 | 77191-36-7  |      | 153     | 246 | 0.64  | 4   |
| 1930   | Nelarabine          | Antineoplastic            | 121032-29-9 |      | 209     | 297 | -0.26 | 10  |
| 1931   | Nelfinavir          | Antiviral                 | 159989-64-7 | Y    | 186     | 568 | 7.28  | 7   |
| 1932   | Nemonapride         | Antiemetic                | 75272-39-8  | Y    | 152     | 388 | 3.78  | 5   |
| 1933   | Neocinchophen       | Analgesic                 | 485-34-7    |      | 74      | 291 | 5.11  | 3   |
| 1934   | Neostigmine Bromide | Cholinergic               | 114-80-7    |      | 167     | 303 |       |     |
| 1935   | Nepafenac           | Antiinflammatory          | 78281-72-8  |      | 179     | 254 | 1.04  | 4   |
| 1936   | Nequinatate         | Antibacterial             | 13997-19-8  |      | 288     | 365 | 4.51  | 5   |
| 1937   | Neridronic Acid     | Bone Resorption Inhibitor | 79778-41-9  |      | 250     | 277 | -0.40 | 8   |
|        |                     |                           |             |      |         |     |       |     |
| 1938   | Nestifylline        | Bronchodilator            | 116763-36-1 |      | 126     | 298 | 0.31  | 6   |
| 1939   | Netupitant          | Antiemetic                | 290297-26-6 |      | 158     | 579 | 2.82  | 5   |
| 1940   | Neutramycin         | Antibacterial             | 1404-08-6   |      | 223     | 687 | -1.48 | 14  |
| 1941   | Nevirapine          | Antiviral                 | 129618-40-2 | Y    | 243     | 266 | 2.64  | 5   |
| 1942   | Niacin              | Dermatologic              | 59-67-6     | Y    | 237     | 123 | 0.22  | 3   |
| 1943   | Niacinamide         | Dermatologic              | 98-92-0     |      | 129     | 122 | -0.37 | 3   |
| 1944   | Nialamide           | Antidepressant            | 51-12-7     |      | 152     | 298 | 0.54  | 6   |
| 1945   | Niaprazine          | Sedative                  | 27367-90-4  |      | 131     | 356 | 2.16  | 5   |
| 1946   | Nicafenine          | Analgesic                 | 64039-88-9  |      | 174     | 447 | 4.31  | 7   |
| 1947   | Nicametate          | Vasodilator               | 3099-52-3   |      | 115     | 222 | 1.72  | 4   |
| 1948   | Nicarbazin          | Antibacterial             | 108-79-2    |      | 197     | 124 | -1.04 | 3   |



| Number | Common Name   | Indication                 | CAS Number | Oral | MP (°C) | MW  | ClogP | HBA |
|--------|---------------|----------------------------|------------|------|---------|-----|-------|-----|
| 1949   | Nicarbazin    | Antibacterial              | 587-90-6   |      | 310     | 302 | 3.75  | 9   |
| 1950   | Nicardipine   | Antianginal                | 55985-32-5 | Y    | 137     | 480 | 4.89  | 9   |
| 1951   | Nicergoline   | Vasodilator                | 27848-84-6 | Y    | 137     | 484 | 2.72  | 6   |
| 1952   | Niceritrol    | Antihyperlipidemic         | 5868-05-3  |      | 161     | 557 | 2.80  | 12  |
| 1953   | Nicosamide    | Anthelmintic               | 50-65-7    |      | 229     | 327 | 3.77  | 6   |
| 1954   | Nicoclonate   | Nootropic                  | 10571-59-2 |      | 61      | 290 | 4.46  | 3   |
| 1955   | Nicofibrate   | Antihyperlipidemic         | 31980-29-7 |      | 49      | 306 | 3.77  | 4   |
| 1956   | Nicofuranose  | Vasodilator                | 15351-13-0 |      | 141     | 601 | -1.53 | 14  |
| 1957   | Nicomol       | Capillary Protectant       | 27959-26-8 |      | 179     | 641 | 2.70  | 13  |
| 1958   | Nicomorphine  | Analgesic                  | 639-48-5   |      | 178     | 496 | 2.02  | 8   |
| 1959   | Nicorandil    | Vasodilator                | 65141-46-0 | Y    | 93      | 211 | 0.74  | 7   |
| 1960   | Nicothiazone  | Unclassified               | 555-90-8   |      | 222     | 180 | 1.08  | 4   |
| 1961   | Nicotredole   | Unclassified               | 29876-14-0 |      | 152     | 265 | 1.61  | 4   |
| 1962   | Nicoxamat     | Unclassified               | 5657-61-4  |      | 167     | 138 | -0.68 | 4   |
| 1963   | Nictindole    | Antithrombotic             | 36504-64-0 |      | 227     | 264 | 3.91  | 3   |
| 1964   | Nifedipine    | Antianginal                | 21829-25-4 | Y    | 172     | 346 | 3.58  | 8   |
| 1965   | Nifenalol     | Antiarrhythmic             | 7413-36-7  |      | 98      | 224 | 1.43  | 5   |
| 1966   | Nifenazone    | Antiinflammatory           | 2139-47-1  |      | 255     | 308 | -0.32 | 6   |
| 1967   | Niflumic Acid | Antiinflammatory           | 4394-00-7  |      | 204     | 282 | 4.46  | 4   |
| 1968   | Nifuradene    | Antibiotic                 | 555-84-0   |      | 262     | 224 | 0.50  | 8   |
| 1969   | Nifuraldezone | Antibiotic                 | 3270-71-1  |      | 265     | 226 | -0.04 | 9   |
| 1970   | Nifuratel     | Antibiotic                 | 4936-47-4  |      | 183     | 285 | 0.72  | 8   |
| 1971   | Nifuratrone   | Antibiotic                 | 19561-70-7 |      | 151     | 200 | -1.17 | 7   |
| 1972   | Nifurdazil    | Antibiotic                 | 5036-03-3  |      | 195     | 268 | -0.06 | 9   |
| 1973   | Nifurfoline   | Antibiotic                 | 3363-58-4  |      | 200     | 337 | 0.28  | 11  |
| 1974   | Nifurimide    | Antibiotic                 | 21638-36-8 |      | 240     | 238 | 1.03  | 8   |
| 1975   | Nifurmerone   | Antibiotic                 | 5579-95-3  |      | 95      | 190 | 0.18  | 5   |
| 1976   | Nifuroquine   | Antibiotic                 | 57474-29-0 |      | 190     | 300 | 0.83  | 8   |
| 1977   | Nifuroxazide  | Antibiotic                 | 965-52-6   |      | 298     | 275 | 1.82  | 8   |
| 1978   | Nifuroxime    | Antibacterial<br>(Topical) | 6236-05-1  |      | 160     | 156 | 1.36  | 6   |
| 1979   | Nifurpipone   | Antibiotic                 | 24632-47-1 |      | 295     | 295 | 1.19  | 9   |
| 1980   | Nifurpirinol  | Antibiotic                 | 13411-16-0 |      | 171     | 246 | 1.09  | 6   |
| 1981   | Nifurpazine   | Antibiotic                 | 1614-20-6  |      | 265     | 232 | -0.18 | 7   |
| 1982   | Nifurquinazol | Antibiotic                 | 5055-20-9  |      | 168     | 344 | 1.58  | 9   |
| 1983   | Nifursol      | Antiprotozoal              | 16915-70-1 |      | 228     | 365 | 3.30  | 14  |
| 1984   | Nifurthiazole | Antibiotic                 | 3570-75-0  |      | 215     | 254 | 1.76  | 8   |
| 1985   | Nifurtimox    | Antibiotic                 | 23256-30-6 | Y    | 181     | 287 | 0.73  | 8   |
| 1986   | Nifurtoinol   | Antibiotic                 | 1088-92-2  |      | 258     | 268 | -0.17 | 10  |
| 1987   | Nifurvidine   | Antibiotic                 | 1900-13-6  |      | 302     | 247 | 1.11  | 7   |
| 1988   | Nifurzide     | Antibiotic                 | 39978-42-2 | Y    | 236     | 336 | 1.88  | 10  |
| 1989   | Nihydrazone   | Antibacterial              | 67-28-7    |      | 233     | 197 | 1.45  | 7   |
| 1990   | Niludipine    | Antianginal                | 22609-73-0 |      | 85      | 491 | 5.11  | 10  |

| Number | Common Name                       | Indication                    | CAS Number  | Oral | MP (°C) | MW  | ClogP | HBA |
|--------|-----------------------------------|-------------------------------|-------------|------|---------|-----|-------|-----|
| 1991   | Nilutamide                        | Antineoplastic                | 63612-50-0  | Y    | 153     | 317 | 1.94  | 7   |
| 1992   | Nilvadipine                       | Antianginal                   | 75530-68-6  | Y    | 158     | 385 | 3.38  | 9   |
| 1993   | Nimesulide                        | Antiinflammatory              | 51803-78-2  | Y    | 143     | 308 | 2.70  | 7   |
| 1994   | Nimetazepam                       | Muscle Relaxant<br>(Skeletal) | 2011-67-8   |      | 157     | 295 | 2.31  | 6   |
| 1995   | Nimodipine                        | Vasodilator                   | 66085-59-4  | Y    | 121     | 418 | 4.05  | 9   |
| 1996   | Nimorazole                        | Antiprotozoal                 | 6506-37-2   |      | 108     | 226 | -0.15 | 7   |
| 1997   | Nimustine                         | Antineoplastic                | 42471-28-3  |      | 125     | 273 | 0.25  | 8   |
| 1998   | Niometacin                        | Antiinflammatory              | 16426-83-8  |      | 189     | 324 | 2.44  | 6   |
| 1999   | Nipradilol                        | Antianginal                   | 81486-22-8  | Y    | 115     | 326 | 1.91  | 8   |
| 2000   | Niridazole                        | Anthelmithic                  | 61-57-4     |      | 261     | 214 | 0.95  | 7   |
| 2001   | Nisobamate                        | Sedative                      | 25269-04-9  |      | 79      | 274 | 2.45  | 6   |
| 2002   | Nisoldipine                       | Antihypertensive              | 63675-72-9  | Y    | 152     | 388 | 4.96  | 8   |
| 2003   | Nithiamide                        | Antiprotozoal                 | 140-40-9    |      | 265     | 187 | 1.30  | 6   |
| 2004   | Nitisinone                        | Dermatologic                  | 104206-65-7 | Y    | 116     | 329 | 0.99  | 6   |
| 2005   | Nitracrine                        | Antidepressant                | 4533-39-5   |      | 135     | 324 | 2.86  | 6   |
| 2006   | Nitrazepam                        | Anticonvulsant                | 146-22-5    | Y    | 225     | 281 | 2.36  | 6   |
| 2007   | Nitrefazole                       | Alcohol Deterrant             | 21721-92-6  |      | 186     | 248 | 2.70  | 6   |
| 2008   | Nitrendipine                      | Antihypertensive              | 39562-70-4  | Y    | 158     | 360 | 3.81  | 8   |
| 2009   | Nitrodan                          | Anthelmithic                  | 962-02-7    |      | 268     | 296 | 2.94  | 7   |
| 2010   | Nitrofurantoin                    | Antibiotic                    | 67-20-9     | Y    | 263     | 238 | -0.47 | 9   |
| 2011   | Nitromide                         | Antibacterial                 | 121-81-3    |      | 181     | 211 | 0.63  | 8   |
| 2012   | Nitromifene                       | Steroid                       | 10448-84-7  |      | 119     | 445 | 4.95  | 6   |
| 2013   | Nitroscanate                      | Anthelmithic                  | 19881-18-6  |      | 110     | 272 | 4.91  | 5   |
| 2014   | Nitrovin                          | Antibacterial                 | 804-36-4    |      | 217     | 360 | 1.14  | 12  |
| 2015   | Nitroxinil                        | Anthelmithic                  | 1689-89-0   |      | 138     | 290 | 2.61  | 5   |
| 2016   | Nitroxoline                       | Antibiotic                    | 4008-48-4   |      | 179     | 190 | 2.00  | 5   |
| 2017   | Nixylic Acid                      | Unclassified                  | 4394-05-2   |      | 245     | 242 | 4.07  | 4   |
| 2018   | Nizatidine                        | Antiulcerative                | 76963-41-2  | Y    | 131     | 331 | -0.49 | 7   |
| 2019   | Nizofenone                        | Nootropic                     | 54533-85-6  |      | 76      | 413 | 4.62  | 7   |
| 2020   | N Methylepinephrine               | Antihypotensive               | 554-99-4    |      | 154     | 197 | 0.00  | 4   |
| 2021   | N Myristyl 3<br>Hydroxybutylamine | Unclassified                  | 143-26-0    |      | 60      | 286 | 6.09  | 2   |
| 2022   | Noberastine                       | Antihistaminic                | 110588-56-2 |      | 120     | 311 | 1.18  | 6   |
| 2023   | Nogalamycin                       | Antineoplastic                | 1404-15-5   |      | 196     | 788 | 2.18  | 17  |
| 2024   | Nolatrexed                        | Antineoplastic                | 147149-76-6 |      | 301     | 284 | 1.87  | 5   |
| 2025   | Nomifensine                       | Antidepressant                | 24526-64-5  |      | 180     | 238 | 1.01  | 2   |
| 2026   | Nonabine                          | Antiemetic                    | 16985-03-8  |      | 88      | 380 | 7.05  | 3   |
| 2027   | Nonivamide                        | Nootropic                     | 2444-46-4   |      | 57      | 293 | 3.20  | 4   |
| 2028   | Noracymethadol                    | Analgesic                     | 1477-39-0   |      | 230     | 339 | 3.99  | 3   |
| 2029   | Norbolethone                      | Steroid                       | 1235-15-0   |      | 145     | 316 | 4.30  | 2   |
| 2030   | Norclostebol                      | Steroid                       | 13583-21-6  |      | 222     | 309 | 3.36  | 2   |
| 2031   | Norcodeine                        | Analgesic                     | 467-15-2    |      | 186     | 285 | 0.52  | 4   |

| Number | Common Name               | Indication       | CAS Number  | Oral | MP (°C) | MW  | ClogP | HBA |
|--------|---------------------------|------------------|-------------|------|---------|-----|-------|-----|
| 2032   | Nordazepam                | Anxiolytic       | 1088-11-5   | Y    | 210     | 271 | 2.78  | 3   |
| 2033   | Nordihydroguaiaretic Acid | Antiinflammatory | 500-38-9    |      | 185     | 302 | 3.52  | 4   |
| 2034   | Norelgestromin            | Contraceptive    | 53016-31-2  |      | 120     | 327 | 4.19  | 3   |
| 2035   | Norethandrolone           | Androgen         | 52-78-8     |      | 139     | 302 | 3.79  | 2   |
| 2036   | Norethindrone             | Progestogen      | 68-22-4     | Y    | 203     | 298 | 2.86  | 2   |
| 2037   | Norethindrone Acetate     | Progestogen      | 51-98-9     |      | 163     | 340 | 3.80  | 3   |
| 2038   | Norethynodrel             | Progestogen      | 68-23-5     |      | 170     | 298 | 2.98  | 2   |
| 2039   | Noreximide                | Sedative         | 6319-06-8   |      | 164     | 163 | 0.22  | 3   |
| 2040   | Norfenefrine              | Antihypotensive  | 536-21-0    |      | 76      | 153 | -0.60 | 3   |
| 2041   | Norfloxacin               | Antibiotic       | 70458-96-7  | Y    | 222     | 319 | 1.74  | 6   |
| 2042   | Norgesterone              | Progestogen      | 13563-60-5  |      | 139     | 300 | 3.79  | 2   |
| 2043   | Norgestimate              | Progestogen      | 35189-28-7  |      | 220     | 370 | 5.13  | 4   |
| 2044   | Norgestrel                | Progestogen      | 6533-00-2   |      | 206     | 312 | 3.37  | 2   |
| 2045   | Norgestrienone            | Progestogen      | 848-21-5    |      | 171     | 294 | 2.80  | 2   |
| 2046   | Norletimol                | Unclassified     | 886-08-8    |      | 30      | 211 | 3.33  | 2   |
| 2047   | Norlevorphanol            | Analgesic        | 1531-12-0   |      | 267     | 243 | 3.12  | 2   |
| 2048   | Normethandrone            | Androgen         | 514-61-4    |      | 150     | 288 | 3.28  | 2   |
| 2049   | Normorphine               | Analgesic        | 466-97-7    |      | 274     | 271 | 0.00  | 4   |
| 2050   | Nortetrazepam             | Anxiolytic       | 10379-11-0  |      | 208     | 275 | 3.17  | 3   |
| 2051   | Nortriptyline             | Antidepressant   | 72-69-5     | Y    | 56      | 263 | 3.97  | 1   |
| 2052   | Norvinisterone            | Progestogen      | 6795-60-4   |      | 168     | 300 | 3.66  | 2   |
| 2053   | Noscapine                 | Antitussive      | 128-62-1    | Y    | 175     | 413 | 2.39  | 8   |
| 2054   | Novobiocin                | Antibacterial    | 303-81-1    |      | 171     | 613 | 3.74  | 13  |
| 2055   | Nufenoxole                | Gastroprokinetic | 57726-65-5  |      | 122     | 388 | 3.73  | 4   |
| 2056   | Nylestriol                | Estrogen         | 39791-20-3  |      | 164     | 381 | 4.98  | 3   |
| 2057   | Nylidrin                  | Vasodilator      | 447-41-6    |      | 118     | 299 | 3.21  | 3   |
| 2058   | Obidoxime Chloride        | Antidote         | 114-90-9    |      | 225     | 359 |       |     |
| 2059   | Octabenzene               | Dermatologic     | 1843-05-6   |      | 48      | 326 | 7.56  | 3   |
| 2060   | Octacaine                 | Anesthetic       | 13912-77-1  |      | 46      | 234 | 2.75  | 3   |
| 2061   | Octaverine                | Antispasmodic    | 549-68-8    |      | 217     | 397 | 2.63  | 6   |
| 2062   | Octopamine                | Antihypotensive  | 104-14-3    |      | 178     | 153 | -0.59 | 3   |
| 2063   | Octrizole                 | Dermatologic     | 3147-75-9   |      | 105     | 323 | 7.42  | 4   |
| 2064   | Ofloxacin                 | Antibiotic       | 82419-36-1  | Y    | 254     | 361 | 1.86  | 7   |
| 2065   | Oglufanide Disodium       | Immunomodulator  | 38101-59-6  |      | 122     | 333 | -0.59 | 8   |
| 2066   | Olanzapine                | Antipsychotic    | 132539-06-1 | Y    | 196     | 312 | 3.08  | 4   |
| 2067   | Olaquinox                 | Antibacterial    | 23696-28-8  |      | 209     | 263 | -3.15 | 7   |
| 2068   | Oleandomycin Phosphate    | Antibiotic       | 3922-90-5   |      | 146     | 688 | 2.31  | 13  |
| 2069   | Oletimol                  | Unclassified     | 5879-67-4   |      | 116     | 225 | 1.42  | 2   |
| 2070   | Olmesartan Medoxomil      | Antihypertensive | 144689-63-4 | Y    | 181     | 559 | 2.80  | 12  |
| 2071   | Olradipine                | Antiparkinsonian | 115972-78-6 |      | 78      | 487 | 3.29  | 8   |
| 2072   | Olvanil                   | Analgesic        | 58493-49-5  |      | 36      | 418 | 7.38  | 4   |
| 2073   | Omeprazole                | Antiulcerative   | 73590-58-6  | Y    | 156     | 345 | 2.36  | 6   |
| 2074   | Omidoline                 | Analgesic        | 21590-91-0  |      | 116     | 365 | 2.18  | 5   |

| Number | Common Name         | Indication                   | CAS Number  | Oral | MP (°C) | MW  | ClogP | HBA |
|--------|---------------------|------------------------------|-------------|------|---------|-----|-------|-----|
| 2075   | Omoconazole Nitrate | Antifungal                   | 74512-12-2  |      | 90      | 424 | 6.13  | 4   |
| 2076   | Ondansetron         | Antiemetic                   | 99614-02-5  | Y    | 238     | 293 | 1.56  | 4   |
| 2077   | Opaviraline         | Antiviral                    | 178040-94-3 |      | 124     | 280 | 2.97  | 5   |
| 2078   | Opipramol           | Antidepressant               | 315-72-0    | Y    | 101     | 364 | 3.27  | 4   |
| 2079   | Orazamide           | Hepatic Protectant           | 360-97-4    |      | 243     | 126 | -0.77 | 5   |
| 2080   | Orbifloxacin        | Antibiotic                   | 113617-63-3 |      | 258     | 395 | 2.97  | 6   |
| 2081   | Orestrate           | Unclassified                 | 13885-31-9  |      | 95      | 409 | 7.70  | 3   |
| 2082   | Orlistat            | Antiobesity                  | 96829-58-2  | Y    | 41      | 496 | 7.00  | 6   |
| 2083   | Ormeloxifene        | Bone Resorption<br>Inhibitor | 31477-60-8  |      | 100     | 458 | 6.21  | 4   |
| 2084   | Ormetoprim          | Antibacterial                | 6981-18-6   |      | 233     | 274 | 1.36  | 6   |
| 2085   | Ornidazole          | Antibacterial                | 16773-42-5  |      | 78      | 220 | 0.60  | 6   |
| 2086   | Orotic Acid         | Uricosuric                   | 65-86-1     |      | 345     | 156 | -0.84 | 6   |
| 2087   | Osalmid             | Choleretic                   | 526-18-1    |      | 179     | 229 | 2.58  | 4   |
| 2088   | Osaterone           | Steroid                      | 105149-04-0 |      | 220     | 365 | 2.00  | 4   |
| 2089   | Oseltamivir         | Antiviral                    | 196618-13-0 | Y    | 108     | 312 | 1.71  | 6   |
| 2090   | Ostreogrycin        | Antibiotic                   | 21411-53-0  |      | 166     | 526 | -0.76 | 10  |
| 2091   | Oteracil            | Antineoplastic               | 937-13-3    |      | 262     | 157 | -1.29 | 7   |
| 2092   | Ouabain             | Cardiotonic                  | 630-60-4    |      | 213     | 585 | -2.21 | 12  |
| 2093   | Oxabolone Cipionate | Steroid                      | 1254-35-9   |      | 158     | 415 | 5.40  | 4   |
| 2094   | Oxaceprol           | Antiinflammatory             | 33996-33-7  |      | 130     | 173 | -0.08 | 5   |
| 2095   | Oxacillin           | Antibiotic                   | 66-79-5     |      | 188     | 401 | 2.55  | 8   |
| 2096   | Oxagrelate          | Antithrombotic               | 56611-65-5  |      | 174     | 276 | 1.33  | 6   |
| 2097   | Oxalic Acid         | Hemostatic                   | 144-62-7    |      | 150     | 90  | -1.08 | 4   |
| 2098   | Oxametacin          | Antiinflammatory             | 27035-30-9  |      | 179     | 373 | 3.99  | 6   |
| 2099   | Oxamniquine         | Anthelmintic                 | 21738-42-1  | Y    | 148     | 279 | 2.02  | 6   |
| 2100   | Oxanamide           | Anxiolytic                   | 126-93-2    |      | 90      | 157 | 1.36  | 3   |
| 2101   | Oxandrolone         | Androgen                     | 53-39-4     | Y    | 237     | 306 | 3.39  | 3   |
| 2102   | Oxapium Iodide      | Antispasmodic                | 6577-41-9   |      | 151     | 471 |       |     |
| 2103   | Oxapropanium Iodide | Cholinergic                  | 541-66-2    |      | 159     | 273 |       |     |
| 2104   | Oxaprotiline        | Antidepressant               | 56433-44-4  |      | 244     | 293 | 3.13  | 2   |
| 2105   | Oxaprozin           | Antiinflammatory             | 21256-18-8  |      | 161     | 293 | 3.15  | 4   |
| 2106   | Oxatomide           | Antihistaminic               | 60607-34-3  | Y    | 156     | 427 | 4.34  | 5   |
| 2107   | Oxazepam            | Anxiolytic                   | 604-75-1    | Y    | 202     | 287 | 2.22  | 4   |
| 2108   | Oxazidione          | Analgesic                    | 27591-42-0  |      | 88      | 321 | 1.08  | 4   |
| 2109   | Oxazolam            | Anxiolytic                   | 24143-17-7  |      | 187     | 329 | 1.14  | 4   |
| 2110   | Oxcarbazepine       | Anticonvulsant               | 28721-07-5  | Y    | 218     | 252 | 1.66  | 4   |
| 2111   | Oxedrine            | Antihypotensive              | 94-07-5     |      | 185     | 167 | 0.13  | 3   |
| 2112   | Oxendolone          | Steroid                      | 33765-68-3  |      | 153     | 302 | 3.94  | 2   |
| 2113   | Oxepinac            | Antiinflammatory             | 55689-65-1  |      | 111     | 268 | 2.19  | 4   |
| 2114   | Oxethazaine         | Anesthetic                   | 126-27-2    |      | 104     | 468 | 4.38  | 6   |
| 2115   | Oxfendazole         | Anthelmintic                 | 53716-50-0  |      | 253     | 315 | 2.00  | 6   |
| 2116   | Oxfenicine          | Vasodilator                  | 32462-30-9  |      | 213     | 167 | 0.32  | 4   |

| Number | Common Name             | Indication                      | CAS Number  | Oral | MP (°C) | MW  | ClogP | HBA |
|--------|-------------------------|---------------------------------|-------------|------|---------|-----|-------|-----|
| 2117   | Oxibendazole            | Anthelmintic                    | 20559-55-1  |      | 230     | 249 | 2.53  | 6   |
| 2118   | Oxibetaine              | Antibacterial                   | 7002-65-5   |      | 158     | 147 |       |     |
| 2119   | Oxiglutatione           | Unclassified                    | 27025-41-8  |      | 171     | 613 |       |     |
| 2120   | Oxilofrine              | Mydriatic                       | 365-26-4    |      | 153     | 181 | 0.48  | 3   |
| 2121   | Oxiniacic Acid          | Antihyperlipidemic              | 2398-81-4   |      | 253     | 139 | -1.69 | 4   |
| 2122   | Oxiperomide             | Antipsychotic                   | 5322-53-2   |      | 170     | 337 | 3.20  | 5   |
| 2123   | Oxiracetam              | Nootropic                       | 62613-82-5  | Y    | 165     | 158 | -2.48 | 5   |
| 2124   | Oxisuran                | Antineoplastic                  | 27302-90-5  |      | 79      | 183 | 0.02  | 3   |
| 2125   | Oxitriptan              | Anticonvulsant                  | 4350-09-8   |      | 273     | 220 | -0.29 | 5   |
| 2126   | Oxitropium Bromide      | Bronchodilator                  | 30286-75-0  |      | 204     | 412 |       |     |
| 2127   | Oxolinic Acid           | Antibiotic                      | 14698-29-4  |      | 315     | 261 | -0.38 | 6   |
| 2128   | Oxomemazine             | Antihistaminic                  | 3689-50-7   |      | 115     | 330 | 3.98  | 4   |
| 2129   | Oxophenarsine           | Antiprotozoal                   | 306-12-7    |      | 287     | 199 |       | 3   |
| 2130   | Oxpheneridine           | Analgesic                       | 546-32-7    |      | 132     | 353 | 3.02  | 4   |
| 2131   | Oxprenolol              | Antihypertensive                | 6452-71-7   | Y    | 70      | 265 | 2.15  | 4   |
| 2132   | Oxybenzone              | Dermatologic                    | 131-57-7    |      | 66      | 228 | 4.00  | 3   |
| 2133   | Oxycinchophen           | Uricosuric                      | 485-89-2    |      | 207     | 265 | 5.05  | 4   |
| 2134   | Oxyclozanide            | Anthelmintic                    | 2277-92-1   |      | 215     | 401 | 8.07  | 4   |
| 2135   | Oxycodone               | Analgesic                       | 76-42-6     | Y    | 219     | 315 | 1.59  | 5   |
| 2136   | Oxydipentonium Chloride | Muscle Relaxant<br>(Skeletal)   | 7174-23-4   |      | 198     | 345 |       |     |
| 2137   | Oxymesterone            | Steroid                         | 145-12-0    |      | 171     | 318 | 2.63  | 3   |
| 2138   | Oxymetazoline           | Decongestant                    | 1491-59-4   |      | 181     | 260 | 3.76  | 3   |
| 2139   | Oxymetholone            | Androgen                        | 434-07-1    | Y    | 179     | 332 | 2.63  | 3   |
| 2140   | Oxymorphone             | Analgesic                       | 76-41-5     |      | 250     | 301 | 1.15  | 5   |
| 2141   | Oxypertine              | Antidepressant                  | 153-87-7    |      | 140     | 380 | 1.86  | 5   |
| 2142   | Oxyphenbutazone         | Antiinflammatory                | 129-20-4    |      | 96      | 324 | 2.74  | 5   |
| 2143   | Oxyphenisatin           | Laxative                        | 125-13-3    |      | 261     | 317 | 1.40  | 4   |
| 2144   | Oxysonium Iodide        | Antibacterial                   | 3569-58-2   |      | 130     | 450 |       |     |
| 2145   | Oxytetracycline         | Antibiotic                      | 79-57-2     | Y    | 185     | 460 | 0.48  | 11  |
| 2146   | Ozagrel                 | Antianginal                     | 82571-53-7  | Y    | 224     | 228 | 0.53  | 4   |
| 2147   | Ozolinone               | Diuretic                        | 56784-39-5  |      | 164     | 256 | 1.72  | 5   |
| 2148   | Paclitaxel              | Antineoplastic                  | 33069-62-4  | Y    | 215     | 854 | 3.95  | 15  |
| 2149   | Padimate O              | Dermatologic                    | 21245-02-3  |      | 243     | 277 | 5.41  | 3   |
| 2150   | Palmidrol               | Oxytocic                        | 544-31-0    |      | 99      | 299 | 5.80  | 3   |
| 2151   | Pamabrom                | Diuretic                        | 10381-75-6  |      | 310     | 259 | -0.24 | 6   |
| 2152   | Pamicogrel              | Antiinflammatory                | 101001-34-7 |      | 134     | 449 | 4.67  | 6   |
| 2153   | Pamidronic Acid         | Bone Resorption<br>Inhibitor    | 40391-99-9  |      | 233     | 235 | -0.89 | 8   |
| 2154   | Panadiplon              | Anxiolytic                      | 124423-84-3 |      | 169     | 335 | 2.76  | 7   |
| 2155   | Panamesine              | Antipsychotic                   | 139225-22-2 |      | 165     | 426 | 2.69  | 8   |
| 2156   | Pancuronium             | Neuromuscular<br>Blocking Agent | 15500-66-0  |      | 215     | 733 |       |     |

| Number | Common Name                     | Indication       | CAS Number  | Oral | MP (°C) | MW  | ClogP | HBA |
|--------|---------------------------------|------------------|-------------|------|---------|-----|-------|-----|
| 2157   | Panidazole                      | Antiprotozoal    | 13752-33-5  |      | 110     | 232 | 0.65  | 6   |
| 2158   | Panipenem                       | Antibiotic       | 87726-17-8  |      | 199     | 339 | -2.85 | 7   |
| 2159   | Panomifene                      | Steroid          | 77599-17-8  |      | 97      | 427 | 2.80  | 3   |
| 2160   | Pantoprazole                    | Antiulcerative   | 102625-70-7 | Y    | 140     | 383 | 1.57  | 7   |
| 2161   | Papaverine                      | Vasodilator      | 58-74-2     | Y    | 147     | 339 | 2.93  | 5   |
| 2162   | Paraflutizide                   | Diuretic         | 1580-83-2   |      | 239     | 406 | 1.29  | 7   |
| 2163   | Paramethadione                  | Anticonvulsant   | 115-67-3    |      | 32      | 157 | 1.30  | 4   |
| 2164   | Paramethasone Acetate           | Glucocorticoid   | 1597-82-6   |      | 235     | 435 | 2.26  | 6   |
| 2165   | Paranyline                      | Antiinflammatory | 1729-61-9   |      | 308     | 296 | 3.64  | 2   |
| 2166   | Parapenzolate Bromide           | Mydriatic        | 5634-41-3   |      | 238     | 420 |       |     |
| 2167   | Parapropamol                    | Unclassified     | 1693-37-4   |      | 170     | 165 | 0.99  | 3   |
| 2168   | Parbendazole                    | Anthelmintic     | 14255-87-9  |      | 226     | 247 | 3.59  | 5   |
| 2169   | Parethoxycaine                  | Analgesic        | 94-23-5     |      | 173     | 265 | 3.85  | 4   |
| 2170   | Paroxypropione                  | Antispasmodic    | 70-70-2     |      | 148     | 150 | 1.91  | 2   |
| 2171   | Parsalmide                      | Antifungal       | 30653-83-9  |      | 84      | 246 | 1.04  | 4   |
| 2172   | Parvaquone                      | Antiamebic       | 4042-30-2   |      | 135     | 256 | 4.28  | 3   |
| 2173   | Pasiniazid                      | Antibacterial    | 65-49-6     |      | 147     | 153 | 1.24  | 4   |
| 2174   | Patamostat                      | Antiviral        | 114568-26-2 |      | 202     | 412 | 1.74  | 8   |
| 2175   | Patupilone                      | Antineoplastic   | 152044-54-7 |      | 118     | 508 | 0.54  | 7   |
| 2176   | Pazinaclone                     | Anxiolytic       | 103255-66-9 |      | 239     | 479 | 0.52  | 8   |
| 2177   | Pazoxide                        | Antihypertensive | 21132-59-2  |      | 345     | 317 | 3.83  | 4   |
| 2178   | Pazufloxacin                    | Antibiotic       | 127045-41-4 |      | 270     | 318 | 0.12  | 6   |
| 2179   | Pecilocin                       | Antibiotic       | 19504-77-9  |      | 42      | 291 | 1.94  | 4   |
| 2180   | Pefloxacin                      | Antibacterial    | 70458-92-3  | Y    | 272     | 333 | 1.92  | 6   |
| 2181   | Pelanserlin                     | Antihypertensive | 2208-51-7   |      | 203     | 364 | 2.79  | 6   |
| 2182   | Pemirolast                      | Antihistaminic   | 69372-19-6  | Y    | 316     | 228 | 0.22  | 7   |
| 2183   | Pemoline                        | Nootropic        | 2152-34-3   | Y    | 257     | 176 | 0.43  | 4   |
| 2184   | Penamecillin                    | Antibacterial    | 983-85-7    |      | 106     | 406 | 2.87  | 8   |
| 2185   | Penbutolol Sulfate              | Antianginal      | 38363-40-5  |      | 70      | 291 | 4.02  |     |
| 2186   | Penciclovir                     | Antiviral        | 39809-25-1  |      | 273     | 253 | -1.35 | 8   |
| 2187   | Penfluridol                     | Antipsychotic    | 26864-56-2  |      | 106     | 524 | 6.95  | 2   |
| 2188   | Pengitoxin                      | Cardiotonic      | 242-04-8    |      | 153     | 991 | 4.88  | 19  |
| 2189   | Penicillamine                   | Antirheumatic    | 52-67-5     | Y    | 199     | 149 | 0.85  | 3   |
| 2190   | Pentaerythritol                 | Sedative         | 115-77-5    |      | 252     | 136 | -2.59 | 4   |
| 2191   | Pentaerythritol<br>Tetranitrate | Vasodilator      | 78-11-5     |      | 141     | 316 | 2.79  | 16  |
| 2192   | Pentagestrone                   | Progestogen      | 7001-56-1   |      | 186     | 399 | 6.08  | 3   |
| 2193   | Pentamethonium Bromide          | Antihypertensive | 541-20-8    |      | 281     | 348 |       |     |
| 2194   | Pentapiperium<br>Methylsulfate  | Antispasmodic    | 7681-80-3   |      | 111     | 416 |       |     |
| 2195   | Pentazocine                     | Analgesic        | 359-83-1    |      | 146     | 285 | 4.15  | 2   |
| 2196   | Penthichloral                   | Sedative         | 5684-90-2   |      | 185     | 266 | 0.15  | 4   |
| 2197   | Pentipine Maleate               | Antipsychotic    | 81382-51-6  |      | 143     | 299 | 2.66  | 5   |

| Number | Common Name                 | Indication       | CAS Number  | Oral | MP (°C) | MW  | ClogP | HBA |
|--------|-----------------------------|------------------|-------------|------|---------|-----|-------|-----|
| 2198   | Pentifylline                | Vasodilator      | 1028-33-7   |      | 83      | 264 | 1.92  | 6   |
| 2199   | Pentisomide                 | Antiarrhythmic   | 78833-03-1  |      | 109     | 319 | 2.79  | 4   |
| 2200   | Pentobarbital               | Sedative         | 76-74-4     |      | 130     | 226 | 2.18  | 5   |
| 2201   | Pentorex                    | Anorexic         | 434-43-5    |      | 76      | 163 | 2.55  | 1   |
| 2202   | Pentostatin                 | Antineoplastic   | 53910-25-1  |      | 221     | 268 | -2.24 | 8   |
| 2203   | Pentoxifylline              | Anticoagulant    | 6493-05-6   |      | 105     | 278 | -0.15 | 7   |
| 2204   | Pentritinol                 | Vasodilator      | 1607-17-6   |      | 29      | 271 | 1.59  | 13  |
| 2205   | Pentylentetrazol            | Nootropic        | 54-95-5     |      | 57      | 138 | 0.14  | 4   |
| 2206   | Pepstatin                   | Unclassified     | 26305-03-3  |      | 228     | 686 | 2.71  | 14  |
| 2207   | Perafensine                 | Antiparkinsonian | 72444-62-3  |      | 108     | 289 | 3.51  | 3   |
| 2208   | Perastine                   | Antineoplastic   | 4960-10-5   |      | 169     | 295 | 3.82  | 2   |
| 2209   | Perazine                    | Antipsychotic    | 84-97-9     |      | 52      | 339 | 4.15  | 3   |
| 2210   | Perfosfamide                | Antineoplastic   | 62435-42-1  |      | 108     | 293 | 0.39  | 6   |
| 2211   | Pergolide                   | Antiparkinsonian | 66104-22-1  | Y    | 212     | 314 | 3.90  | 2   |
| 2212   | Periciazine                 | Antipsychotic    | 2622-26-6   |      | 117     | 365 | 3.65  | 4   |
| 2213   | Perimetazine                | Antipsychotic    | 13093-88-4  |      | 138     | 385 | 4.36  | 4   |
| 2214   | Perisoxal                   | Antiinflammatory | 2055-44-9   |      | 108     | 272 | 1.96  | 4   |
| 2215   | Perlapine                   | Sedative         | 1977-11-3   |      | 137     | 291 | 3.16  | 3   |
| 2216   | Permethrin                  | Dermatologic     | 52645-53-1  |      | 37      | 391 | 7.36  | 3   |
| 2217   | Perphenazine                | Antipsychotic    | 58-39-9     | Y    | 97      | 404 | 3.94  | 4   |
| 2218   | Perzinfotel                 | Analgesic        | 144912-63-0 |      | 269     | 260 | -1.84 | 7   |
| 2219   | Petrichloral                | Sedative         | 78-12-6     |      | 53      | 726 | 6.80  | 8   |
| 2220   | Pexantel                    | Anthelmintic     | 10001-13-5  |      | 146     | 210 | 1.55  | 3   |
| 2221   | Phanquone                   | Antiamoebic      | 84-12-8     |      | 295     | 210 | 1.02  | 4   |
| 2222   | Phenacaine                  | Analgesic        | 101-93-9    |      | 117     | 298 | 4.46  | 4   |
| 2223   | Phenacemide                 | Anticonvulsant   | 63-98-9     |      | 213     | 178 | 0.87  | 4   |
| 2224   | Phenacetin                  | Analgesic        | 62-44-2     |      | 135     | 179 | 1.66  | 3   |
| 2225   | Phenactropinium Chloride    | Antihypertensive | 3784-89-2   |      | 193     | 430 |       |     |
| 2226   | Phenadoxone                 | Analgesic        | 467-84-5    |      | 76      | 351 | 3.52  | 3   |
| 2227   | Phenaglycodol               | Sedative         | 79-93-6     |      | 73      | 215 | 2.35  | 2   |
| 2228   | Phenamazoline               | Antibiotic       | 501-62-2    |      | 87      | 175 | 1.28  | 3   |
| 2229   | Phenanthrene                | Antineoplastic   | 85-01-8     |      | 99      | 178 | 4.55  | 0   |
| 2230   | Phenazocine<br>Hydrobromide | Analgesic        | 127-35-5    |      | 180     | 321 | 4.59  | 1   |
| 2231   | Phenazopyridine             | Analgesic        | 94-78-0     | Y    | 138     | 213 | 2.21  | 5   |
| 2232   | Phencarbamide               | Antispasmodic    | 3735-90-8   |      | 49      | 328 | 4.38  | 3   |
| 2233   | Phencyclidine               | Anesthetic       | 77-10-1     |      | 46      | 243 | 4.25  | 1   |
| 2234   | Pheneturide                 | Anticonvulsant   | 90-49-3     |      | 153     | 206 | 1.73  | 4   |
| 2235   | Phenformin                  | Antidiabetic     | 114-86-3    |      | 174     | 205 | -0.64 | 5   |
| 2236   | Phenglutarimide             | Antiparkinsonian | 1156-05-4   |      | 126     | 288 | 1.89  | 4   |
| 2237   | Phenicarbazide              | Antiinflammatory | 103-03-7    |      | 172     | 151 | 0.13  | 4   |
| 2238   | Phenindamine                | Antihistaminic   | 82-88-2     |      | 90      | 261 | 3.81  | 1   |
| 2239   | Phenindione                 | Anticoagulant    | 83-12-5     |      | 150     | 222 | 3.13  | 2   |

| Number | Common Name            | Indication                    | CAS Number  | Oral | MP (°C) | MW  | ClogP | HBA |
|--------|------------------------|-------------------------------|-------------|------|---------|-----|-------|-----|
| 2240   | Phenobarbital          | Anticonvulsant                | 50-06-6     | Y    | 172     | 232 | 0.53  | 5   |
| 2241   | Phenol Camphorated     | Dermatologic                  | 108-95-2    |      | 41      | 94  | 1.54  | 1   |
| 2242   | Phenolphthalein        | Laxative                      | 77-09-8     |      | 260     | 318 | 1.91  | 4   |
| 2243   | Phenomorphin           | Analgesic                     | 468-07-5    |      | 244     | 347 | 5.22  | 2   |
| 2244   | Phenothiazine          | Anthelmintic                  | 92-84-2     |      | 183     | 199 | 4.15  | 1   |
| 2245   | Phenoxyacetic Acid     | Dermatologic                  | 122-59-8    |      | 99      | 152 | 0.89  | 3   |
| 2246   | Phenoxybenzamine       | Antihypertensive              | 59-96-1     | Y    | 39      | 304 | 3.69  | 2   |
| 2247   | Phenprobamate          | Muscle Relaxant<br>(Skeletal) | 673-31-4    |      | 103     | 179 | 1.93  | 3   |
| 2248   | Phenprocoumon          | Anticoagulant                 | 435-97-2    | Y    | 175     | 280 | 4.64  | 3   |
| 2249   | Phensuximide           | Anticonvulsant                | 86-34-0     |      | 66      | 189 | 0.04  | 3   |
| 2250   | Phentolamine           | Antihypertensive              | 50-60-2     |      | 175     | 281 | 4.08  | 4   |
| 2251   | Phenyl Aminosalicylate | Antibacterial                 | 133-11-9    |      | 150     | 229 | 3.05  | 4   |
| 2252   | Phenyl Salicylate      | Analgesic                     | 118-55-8    |      | 42      | 214 | 3.29  | 3   |
| 2253   | Phenylbutazone         | Antiinflammatory              | 50-33-9     |      | 105     | 308 | 3.38  | 4   |
| 2254   | Phenylephrine          | Mydriatic                     | 59-42-7     |      | 171     | 167 | 0.12  | 3   |
| 2255   | Phenylpropanolamine    | Decongestant                  | 14838-15-4  |      | 103     | 151 | 0.36  | 2   |
| 2256   | Phenyracillin          | Antibiotic                    | 7463-81-2   |      | 181     | 238 | 2.49  | 2   |
| 2257   | Phenylramidol          | Analgesic                     | 553-69-5    |      | 84      | 214 | 2.32  | 3   |
| 2258   | Phenytoin              | Anticonvulsant                | 57-41-0     | Y    | 295     | 252 | 1.42  | 4   |
| 2259   | Phetharbital           | Sedative                      | 357-67-5    |      | 177     | 260 | 1.99  | 5   |
| 2260   | Phethenylate Sodium    | Anticonvulsant                | 7772-37-4   |      | 255     | 258 | 1.02  | 4   |
| 2261   | Pholcodine             | Antitussive                   | 509-67-1    |      | 94      | 399 | 0.56  | 6   |
| 2262   | Pholedrine             | Antihypertensive              | 370-14-9    |      | 163     | 165 | 1.55  | 2   |
| 2263   | Phthalofyne            | Anthelmintic                  | 131-67-9    |      | 105     | 246 | 2.11  | 4   |
| 2264   | Phthalylsulfacetamide  | Antibiotic                    | 131-69-1    |      | 196     | 362 | 0.66  | 8   |
| 2265   | Phthalylsulfathiazole  | Antibiotic                    | 85-73-4     |      | 260     | 403 | 0.80  | 8   |
| 2266   | Physostigmine          | Cholinergic                   | 57-47-6     |      | 106     | 275 | 1.27  | 5   |
| 2267   | Piberaline             | Antidepressant                | 39640-15-8  |      | 97      | 281 | 1.62  | 4   |
| 2268   | Pibutidine             | Antiulcerative                | 103922-33-4 |      | 228     | 356 | 1.33  | 7   |
| 2269   | Picartamide            | Antimigraine                  | 76732-75-7  |      | 131     | 238 | 3.78  | 2   |
| 2270   | Picenadol              | Analgesic                     | 79201-85-7  |      | 158     | 247 | 3.74  | 2   |
| 2271   | Piconol                | Decongestant                  | 586-98-1    |      | 73      | 109 | 0.29  | 2   |
| 2272   | Picotamide             | Antithrombotic                | 32828-81-2  |      | 130     | 376 | 1.88  | 7   |
| 2273   | Picric Acid            | Dermatologic                  | 88-89-1     |      | 122     | 229 | 1.68  | 10  |
| 2274   | Picrotoxin             | Nootropic                     | 17617-45-7  |      | 204     | 292 | 0.46  | 6   |
| 2275   | Picumast               | Antihistaminic                | 39577-19-0  |      | 116     | 441 | 4.13  | 5   |
| 2276   | Pidolic Acid           | Unclassified                  | 98-79-3     |      | 161     | 129 | -1.35 | 4   |
| 2277   | Pidotimod              | Immunomodulator               | 121808-62-6 |      | 195     | 244 | 1.70  | 6   |
| 2278   | Pifexole               | Antiparkinsonian              | 27199-40-2  |      | 111     | 258 | 2.72  | 4   |
| 2279   | Pilocarpine            | Antiglaucoma                  | 92-13-7     | Y    | 34      | 208 | -0.24 | 4   |
| 2280   | Pimagedine             | Antidiabetic                  | 79-17-4     |      | 133     | 74  | -1.48 | 4   |
| 2281   | Pimecrolimus           | Immunomodulator               | 137071-32-0 |      | 136     | 810 | 5.76  | 12  |



| Number | Common Name            | Indication                    | CAS Number  | Oral | MP (°C) | MW  | ClogP | HBA |
|--------|------------------------|-------------------------------|-------------|------|---------|-----|-------|-----|
| 2282   | Pimefylline            | Vasodilator                   | 10001-43-1  |      | 112     | 314 | -0.44 | 8   |
| 2283   | Pimethixene            | Antipsychotic                 | 314-03-4    |      | 121     | 293 | 4.31  | 1   |
| 2284   | Pimetremide            | Anticonvulsant                | 578-89-2    |      | 99      | 270 | -0.01 | 4   |
| 2285   | Pimozide               | Antipsychotic                 | 2062-78-4   | Y    | 216     | 462 | 5.76  | 4   |
| 2286   | Pinacidil              | Antihypertensive              | 60560-33-0  |      | 112     | 245 | 2.31  | 5   |
| 2287   | Pinafide               | Antineoplastic                | 54824-20-3  |      | 146     | 339 | 1.53  | 7   |
| 2288   | Pinaverium Bromide     | Antispasmodic                 | 53251-94-8  | Y    | 176     | 591 |       |     |
| 2289   | Pinazepam              | Anxiolytic                    | 52463-83-9  |      | 143     | 309 | 4.16  | 3   |
| 2290   | Pindolol               | Antihypertensive              | 13523-86-9  | Y    | 168     | 248 | 1.68  | 4   |
| 2291   | Pioglitazone           | Antidiabetic                  | 111025-46-8 | Y    | 183     | 356 | 3.50  | 5   |
| 2292   | Pipamazine             | Antiemetic                    | 84-04-8     |      | 143     | 402 | 4.57  | 4   |
| 2293   | Pipamperone            | Antipsychotic                 | 1893-33-0   |      | 127     | 375 | 2.47  | 5   |
| 2294   | Pipazethate            | Antitussive                   | 2167-85-3   |      | 66      | 400 | 4.34  | 6   |
| 2295   | Pipebuzone             | Antiinflammatory              | 27315-91-9  |      | 129     | 421 | 2.69  | 6   |
| 2296   | Pipecuronium Bromide   | Muscle Relaxant<br>(Skeletal) | 52212-02-9  |      | 263     | 763 |       |     |
| 2297   | Pipemidic Acid         | Antibiotic                    | 51940-44-4  |      | 254     | 303 | -0.19 | 8   |
| 2298   | Pipenzolate Bromide    | Antispasmodic                 | 125-51-9    |      | 180     | 434 |       |     |
| 2299   | Piperacetazine         | Antipsychotic                 | 3819-00-9   |      | 106     | 411 | 4.10  | 4   |
| 2300   | Piperacillin           | Antibiotic                    | 61477-96-1  |      | 182     | 518 | 1.00  | 12  |
| 2301   | Piperamide Maleate     | Anthelmintic                  | 299-48-9    |      | 200     | 304 | 0.93  | 5   |
| 2302   | Piperazine             | Anthelmintic                  | 110-85-0    |      | 108     | 86  | -1.50 | 2   |
| 2303   | Piperidione            | Antitussive                   | 77-03-2     |      | 105     | 169 | 0.12  | 3   |
| 2304   | Piperilate             | Antispasmodic                 | 4546-39-8   |      | 169     | 339 | 3.50  | 4   |
| 2305   | Piperine               | Antibacterial                 | 94-62-2     |      | 129     | 285 | 3.37  | 4   |
| 2306   | Pipobroman             | Antineoplastic                | 54-91-1     |      | 106     | 356 | 0.42  | 4   |
| 2307   | Piposulfan             | Antineoplastic                | 2608-24-4   |      | 176     | 386 | -1.51 | 10  |
| 2308   | Pipradrol              | Nootropic                     | 467-60-7    |      | 82      | 267 | 3.61  | 2   |
| 2309   | Piprozolin             | Choleretic                    | 17243-64-0  |      | 87      | 298 | 3.26  | 5   |
| 2310   | Piracetam              | Nootropic                     | 7491-74-9   | Y    | 146     | 142 | -1.75 | 4   |
| 2311   | Pirarubicin            | Antineoplastic                | 72496-41-4  |      | 185     | 628 | 0.93  | 13  |
| 2312   | Pirazolac              | Antirheumatic                 | 71002-09-0  |      | 142     | 331 | 3.84  | 4   |
| 2313   | Pirenoxine             | Ophthalmic                    | 1043-21-6   |      | 248     | 308 | 1.03  | 7   |
| 2314   | Piretanide             | Diuretic                      | 55837-27-9  | Y    | 226     | 362 | 2.30  | 7   |
| 2315   | Piribedil              | Vasodilator                   | 3605-01-4   | Y    | 95      | 298 | 2.43  | 6   |
| 2316   | Piridoxilate           | Nootropic                     | 17692-44-3  |      | 167     | 243 | -0.69 | 7   |
| 2317   | Pirifibrate            | Antihyperlipidemic            | 55285-45-5  |      | 46      | 336 | 2.85  | 5   |
| 2318   | Pirinixic Acid         | Antihyperlipidemic            | 50892-23-4  |      | 152     | 324 | 3.96  | 5   |
| 2319   | Pirinixil              | Antihyperlipidemic            | 65089-17-0  |      | 145     | 367 | 3.00  | 6   |
| 2320   | Piriqualone            | Muscle Relaxant<br>(Skeletal) | 1897-89-8   |      | 195     | 339 | 4.00  | 4   |
| 2321   | Piritramide            | Analgesic                     | 302-41-0    |      | 150     | 431 | 2.78  | 5   |
| 2322   | Piritrexim Isethionate | Antineoplastic                | 72732-56-0  |      | 253     | 325 | 1.97  | 7   |

| Number | Common Name                | Indication         | CAS Number  | Oral | MP (°C) | MW  | ClogP | HBA |
|--------|----------------------------|--------------------|-------------|------|---------|-----|-------|-----|
| 2323   | Pirmenol                   | Antiarrhythmic     | 68252-19-7  |      | 71      | 338 | 3.57  | 3   |
| 2324   | Piroctone                  | Dermatologic       | 50650-76-5  |      | 108     | 237 | 3.75  | 3   |
| 2325   | Pirodavir                  | Antiviral          | 124436-59-5 |      | 125     | 369 | 4.08  | 6   |
| 2326   | Piromast                   | Antihistamine      | 108310-20-9 |      | 283     | 307 | 1.05  | 5   |
| 2327   | Pirolate                   | Bronchodilator     | 55149-05-8  |      | 275     | 329 | 0.27  | 8   |
| 2328   | Piromidic Acid             | Antibacterial      | 19562-30-2  |      | 315     | 288 | -0.19 | 7   |
| 2329   | Piroxicam                  | Antiinflammatory   | 36322-90-4  | Y    | 199     | 331 | 0.59  | 7   |
| 2330   | Piroximone                 | Cardiotonic        | 84490-12-0  |      | 265     | 217 | 1.86  | 5   |
| 2331   | Pirozadil                  | Antihyperlipidemic | 54110-25-7  |      | 123     | 528 | 5.29  | 11  |
| 2332   | Pirprofen                  | Antiinflammatory   | 31793-07-4  |      | 99      | 252 | 2.15  | 3   |
| 2333   | Pivhydrazine               | Antidepressant     | 306-19-4    |      | 69      | 206 | 1.93  | 3   |
| 2334   | Pizotiline                 | Antidepressant     | 15574-96-6  |      | 164     | 295 | 2.71  | 1   |
| 2335   | Plafibride                 | Antithrombotic     | 63394-05-8  |      | 101     | 356 | 2.11  | 7   |
| 2336   | Pleuromulin                | Antibiotic         | 125-65-5    |      | 168     | 379 | 1.85  | 5   |
| 2337   | Podiflen                   | Unclassified       | 13409-53-5  |      | 223     | 345 | 2.80  | 5   |
| 2338   | Podofilox                  | Antiviral          | 518-28-5    |      | 118     | 414 | 2.35  | 8   |
| 2339   | Polythiazide               | Diuretic           | 346-18-9    | Y    | 203     | 440 | 2.05  | 7   |
| 2340   | Ponalrestat                | Antidiabetic       | 72702-95-5  |      | 185     | 391 | 2.60  | 5   |
| 2341   | Posaconazole               | Antifungal         | 171228-49-2 | Y    | 168     | 701 | 4.67  | 12  |
| 2342   | Thiocyanate                | Unclassified       | 302-04-5    |      | 169     | 58  |       |     |
| 2343   | Practolol                  | Antiarrhythmic     | 6673-35-4   |      | 133     | 266 | 0.59  | 5   |
| 2344   | Pramiverine                | Antispasmodic      | 14334-40-8  |      | 70      | 293 | 5.53  | 1   |
| 2345   | Pranidipine                | Antihypertensive   | 99522-79-9  |      | 144     | 448 | 5.53  | 8   |
| 2346   | Pranoprofen                | Antiinflammatory   | 52549-17-4  |      | 185     | 255 | 1.34  | 4   |
| 2347   | Prasterone                 | Steroid            | 53-43-0     | Y    | 151     | 288 | 3.31  | 2   |
| 2348   | Pravadoline                | Analgesic          | 92623-83-1  |      | 105     | 378 | 4.82  | 5   |
| 2349   | Pravastatin Sodium         | Antihyperlipidemic | 81093-37-0  | Y    | 182     | 425 | 2.21  | 7   |
| 2350   | Praxadine                  | Antibiotic         | 4023-00-1   |      | 99      | 110 | -0.63 | 4   |
| 2351   | Prazepam                   | Sedative           | 2955-38-6   | Y    | 145     | 325 | 3.70  | 3   |
| 2352   | Prazepine                  | Anticonvulsant     | 50-49-7     |      | 173     | 280 | 4.36  | 2   |
| 2353   | Praziquantel               | Anthelmintic       | 55268-74-1  | Y    | 135     | 312 | 2.66  | 4   |
| 2354   | Prazosin                   | Antihypertensive   | 19216-56-9  | Y    | 282     | 383 | 2.14  | 9   |
| 2355   | Prednicarbate              | Glucocorticoid     | 73771-04-7  |      | 111     | 489 | 2.83  | 8   |
| 2356   | Prednimustine              | Antineoplastic     | 29069-24-7  |      | 164     | 647 | 5.03  | 7   |
| 2357   | Prednisolamate             | Glucocorticoid     | 5626-34-6   |      | 176     | 474 | 3.23  | 7   |
| 2358   | Prednisolone               | Glucocorticoid     | 50-24-8     | Y    | 237     | 360 | 1.64  | 5   |
| 2359   | Prednisolone Acetate       | Glucocorticoid     | 52-21-1     | Y    | 238     | 402 | 2.26  | 6   |
| 2360   | Prednisolone Hemisuccinate | Glucocorticoid     | 2920-86-7   |      | 191     | 461 | 2.42  | 8   |
| 2361   | Prednisolone Pivalate      | Glucocorticoid     | 1107-99-9   |      | 235     | 445 | 3.53  | 6   |
| 2362   | Prednisolone Steaglate     | Glucocorticoid     | 5060-55-9   |      | 106     | 685 | 10.30 | 8   |
| 2363   | Prednisolone Tebutate      | Glucocorticoid     | 7681-14-3   |      | 270     | 459 | 4.04  | 6   |
| 2364   | Prednisone                 | Glucocorticoid     | 53-03-2     | Y    | 232     | 358 | 1.57  | 5   |

| Number | Common Name            | Indication         | CAS Number  | Oral | MP (°C) | MW  | ClogP | HBA |
|--------|------------------------|--------------------|-------------|------|---------|-----|-------|-----|
| 2365   | Prednival              | Glucocorticoid     | 15180-00-4  |      | 212     | 445 | 3.74  | 6   |
| 2366   | Prednylidene           | Glucocorticoid     | 599-33-7    |      | 234     | 372 | 1.64  | 5   |
| 2367   | Pregabalin             | Anticonvulsant     | 148553-50-8 | Y    | 189     | 159 | 1.09  | 3   |
| 2368   | Pregnandiol            | Progestogen        | 25908-35-4  |      | 240     | 321 |       | 2   |
| 2369   | Pregnenolone           | Progestogen        | 145-13-1    |      | 189     | 316 | 4.60  | 2   |
| 2370   | Pregnenolone Acetate   | Progestogen        | 1778-02-5   |      | 147     | 359 | 5.52  | 3   |
| 2371   | Pregnenolone Succinate | Progestogen        | 4598-67-8   |      | 179     | 417 | 5.69  | 5   |
| 2372   | Premazepam             | Anxiolytic         | 57435-86-6  |      | 270     | 253 | 1.31  | 4   |
| 2373   | Prenalterol            | Adrenergic         | 57526-81-5  |      | 128     | 225 | 1.27  | 4   |
| 2374   | Prenderol              | Unclassified       | 115-76-4    |      | 59      | 132 | 0.69  | 2   |
| 2375   | Prenylamine            | Vasodilator        | 390-64-7    |      | 37      | 329 | 5.62  | 1   |
| 2376   | Pridefine              | Antidepressant     | 5370-41-2   |      | 46      | 263 | 3.38  | 1   |
| 2377   | Pridinol               | Antiparkinsonian   | 511-45-5    |      | 115     | 295 | 3.35  | 2   |
| 2378   | Prifelone              | Antiinflammatory   | 69425-13-4  |      | 130     | 316 | 6.70  | 2   |
| 2379   | Prifinium Bromide      | Antispasmodic      | 4630-95-9   |      | 217     | 386 |       |     |
| 2380   | Prilocaine             | Anesthetic         | 721-50-6    |      | 38      | 220 | 2.03  | 3   |
| 2381   | Probarbital Sodium     | Sedative           | 76-76-6     |      | 196     | 198 | 1.16  | 5   |
| 2382   | Probenecid             | Uricosuric         | 57-66-9     | Y    | 197     | 285 | 2.51  | 5   |
| 2383   | Probicromil Calcium    | Antihistaminic     | 58805-38-2  |      | 311     | 344 | 2.56  | 8   |
| 2384   | Probucol               | Antihyperlipidemic | 23288-49-5  |      | 125     | 517 | 9.00  | 2   |
| 2385   | Procaine               | Anesthetic         | 59-46-1     | Y    | 61      | 236 | 2.26  | 4   |
| 2386   | Prochlorperazine       | Antiemetic         | 58-38-8     | Y    | 228     | 374 | 4.65  | 3   |
| 2387   | Proclonol              | Anthelmintic       | 14088-71-2  |      | 60      | 293 | 4.83  | 1   |
| 2388   | Procodazole            | Immunomodulator    | 23249-97-0  |      | 228     | 190 | 1.51  | 4   |
| 2389   | Procyclidine           | Antiparkinsonian   | 77-37-2     | Y    | 86      | 287 | 3.86  | 2   |
| 2390   | Procymate              | Anxiolytic         | 13931-64-1  |      | 129     | 185 | 2.64  | 3   |
| 2391   | Prodolic Acid          | Antiinflammatory   | 36505-82-5  |      | 153     | 273 | 3.57  | 4   |
| 2392   | Progabide              | Anticonvulsant     | 62666-20-0  |      | 138     | 335 | 2.97  | 4   |
| 2393   | Progesterone           | Progestogen        | 57-83-0     | Y    | 127     | 314 | 3.83  | 2   |
| 2394   | Proglumide             | Antiulcerative     | 6620-60-6   | Y    | 145     | 334 | 2.69  | 6   |
| 2395   | Proligestone           | Progestogen        | 23873-85-0  |      | 94      | 387 | 3.65  | 4   |
| 2396   | Promethazine           | Antihistaminic     | 60-87-7     | Y    | 60      | 284 | 4.89  | 2   |
| 2397   | Pronetalol             | Antianginal        | 54-80-8     |      | 107     | 229 | 2.77  | 2   |
| 2398   | Propacetamol           | Analgesic          | 66532-85-2  |      | 56      | 264 | 1.54  | 5   |
| 2399   | Propatyl Nitrate       | Vasodilator        | 2921-92-8   |      | 52      | 269 | 3.16  | 12  |
| 2400   | Propentofylline        | Nootropic          | 55242-55-2  |      | 70      | 306 | 0.87  | 7   |
| 2401   | Propetamide            | Antidiabetic       | 730-07-4    |      | 94      | 250 | 1.87  | 4   |
| 2402   | Propisergide           | Antimigraine       | 5793-04-4   |      | 179     | 339 | 1.30  | 5   |
| 2403   | Propizepine            | Antidepressant     | 10321-12-7  |      | 121     | 296 | 3.34  | 5   |
| 2404   | Propoxyphene           | Analgesic          | 469-62-5    |      | 76      | 339 | 4.10  | 3   |
| 2405   | Propranolol            | Antihypertensive   | 525-66-6    | Y    | 96      | 259 | 2.90  | 3   |
| 2406   | Propylthiouracil       | Thyroid            | 51-52-5     | Y    | 214     | 170 | 1.15  | 3   |
| 2407   | Propyperone            | Antipsychotic      | 3781-28-0   |      | 96      | 389 | 3.60  | 4   |

| Number | Common Name            | Indication           | CAS Number  | Oral | MP (°C) | MW  | ClogP | HBA |
|--------|------------------------|----------------------|-------------|------|---------|-----|-------|-----|
| 2408   | Propyphenazone         | Analgesic            | 479-92-5    |      | 102     | 230 | 1.72  | 3   |
| 2409   | Propyromazine Bromide  | Antispasmodic        | 145-54-0    |      | 227     | 419 |       |     |
| 2410   | Proquazone             | Antiinflammatory     | 22760-18-5  |      | 138     | 278 | 3.16  | 3   |
| 2411   | Proquinolate           | Antibacterial        | 1698-95-9   |      | 255     | 319 | 3.31  | 6   |
| 2412   | Proscillaridin         | Cardiotonic          | 466-06-8    |      | 225     | 531 | 2.34  | 8   |
| 2413   | Proterguride           | Antipsychotic        | 77650-95-4  |      | 133     | 369 | 3.22  | 5   |
| 2414   | Protheobromine         | Diuretic             | 50-39-5     |      | 136     | 238 | -0.87 | 7   |
| 2415   | Prothixene             | Antipsychotic        | 2622-24-4   |      | 58      | 281 | 4.68  | 1   |
| 2416   | Protionamide           | Antibacterial        | 14222-60-7  |      | 139     | 180 | 1.68  | 2   |
| 2417   | Protizinic Acid        | Antiinflammatory     | 13799-03-6  |      | 124     | 315 | 3.98  | 4   |
| 2418   | Protokylol             | Bronchodilator       | 136-70-9    |      | 127     | 331 | 1.87  | 6   |
| 2419   | Proveratrine A         | Antihypertensive     | 143-57-7    |      | 268     | 794 | 4.41  | 15  |
| 2420   | Proveratrine B         | Antihypertensive     | 124-97-0    |      | 263     | 810 | 3.43  | 16  |
| 2421   | Proxibarbal            | Sedative             | 2537-29-3   |      | 163     | 226 | -0.31 | 6   |
| 2422   | Proxiphylline          | Bronchodilator       | 603-00-9    |      | 134     | 238 | 14.55 | 7   |
| 2423   | Pseudoephedrine        | Decongestant         | 90-82-4     | Y    | 118     | 165 | 1.08  | 2   |
| 2424   | Psilocybine            | Antipsychotic        | 520-52-5    |      | 209     | 284 | 0.72  | 6   |
| 2425   | Puomycin               | Antineoplastic       | 53-79-2     |      | 177     | 472 | 1.30  | 12  |
| 2426   | Pyrantel               | Anthelmintic         | 15686-83-6  | Y    | 179     | 206 | 2.08  | 2   |
| 2427   | Pyrazinamide           | Antibacterial        | 98-96-4     | Y    | 188     | 123 | -0.71 | 4   |
| 2428   | Pyricarbate            | Glucocorticoid       | 1882-26-4   |      | 133     | 253 | 0.24  | 7   |
| 2429   | Pyridarone             | Antiarrhythmic       | 7035-04-3   |      | 134     | 195 | 3.00  | 2   |
| 2430   | Pyridofylline          | Vasodilator          | 65-23-6     |      | 161     | 169 | -0.83 | 4   |
| 2431   | Pyrilamine             | Antihistaminic       | 91-84-9     |      | 133     | 285 | 2.67  | 4   |
| 2432   | Pyrimethamine          | Antimalarial         | 58-14-0     | Y    | 236     | 249 | 2.75  | 4   |
| 2433   | Pyrinoline             | Antiarrhythmic       | 1740-22-3   |      | 147     | 416 | 4.58  | 5   |
| 2434   | Pyrithione             | Antibacterial        | 1121-30-8   |      | 69      | 127 | 0.40  | 2   |
| 2435   | Pyrithioxin            | Nootropic            | 1098-97-1   |      | 218     | 368 | 0.64  | 6   |
| 2436   | Pyrithyldione          | Sedative             | 77-04-3     |      | 90      | 167 | 1.47  | 3   |
| 2437   | Pyrogallol             | Neuromuscular        | 87-66-1     |      | 133     | 126 | 0.06  | 3   |
|        |                        | Blocking Agent       |             |      |         |     |       |     |
| 2438   | Pyrrbutamine Phosphate | Antihistaminic       | 91-82-7     |      | 49      | 312 | 4.57  | 1   |
| 2439   | Pyrocaine              | Anesthetic           | 2210-77-7   |      | 83      | 232 | 1.62  | 3   |
| 2440   | Pyrolnitrin            | Antifungal           | 1018-71-9   |      | 125     | 257 | 3.99  | 4   |
| 2441   | Quazepam               | Sedative             | 36735-22-5  | Y    | 138     | 387 | 4.03  | 2   |
| 2442   | Quazodine              | Cardiotonic          | 4015-32-1   |      | 149     | 218 | 1.48  | 4   |
| 2443   | Quazolast              | Bronchodilator       | 86048-40-0  |      | 218     | 263 | 2.47  | 5   |
| 2444   | Quercetin              | Capillary Protectant | 117-39-5    | Y    | 311     | 302 | 1.99  | 7   |
| 2445   | Quetiapine             | Antipsychotic        | 111974-69-7 | Y    | 173     | 384 | 2.60  | 5   |
| 2446   | Quifenadine            | Antihistaminic       | 10447-39-9  |      | 236     | 293 | 3.10  | 2   |
| 2447   | Quinacillin            | Antibiotic           | 1596-63-0   |      | 136     | 416 | 1.45  | 10  |
| 2448   | Quinacrine             | Antimalarial         | 83-89-6     | Y    | 160     | 400 | 5.59  | 4   |
| 2449   | Quinagolide            | Antipsychotic        | 87056-78-8  | Y    | 123     | 396 | 4.12  | 6   |

| Number | Common Name          | Indication                    | CAS Number  | Oral | MP (°C) | MW  | ClogP | HBA |
|--------|----------------------|-------------------------------|-------------|------|---------|-----|-------|-----|
| 2450   | Quinaldine Blue      | Antineoplastic                | 2768-90-3   |      | 263     | 389 |       |     |
| 2451   | Quinaprilat          | Antihypertensive              | 82768-85-2  | Y    | 167     | 410 | 5.18  | 7   |
| 2452   | Quinbolone           | Steroid                       | 2487-63-0   |      | 134     | 353 | 5.28  | 2   |
| 2453   | Quincarbate          | Urologic                      | 54340-59-9  |      | 294     | 368 | 3.01  | 7   |
| 2454   | Quindecamine Acetate | Antibacterial                 | 19056-26-9  |      | 151     | 455 | 8.63  | 4   |
| 2455   | Quindoxin            | Antibacterial                 | 2423-66-7   |      | 240     | 162 | -0.73 | 4   |
| 2456   | Quinestradol         | Estrogen                      | 1169-79-5   |      | 99      | 357 | 4.80  | 3   |
| 2457   | Quinestrol           | Estrogen                      | 152-43-2    |      | 108     | 365 | 6.38  | 2   |
| 2458   | Quinethazone         | Diuretic                      | 73-49-4     |      | 251     | 290 | 3.59  | 6   |
| 2459   | Quinetolate          | Muscle Relaxant<br>(Skeletal) | 27166-18-3  |      | 108     | 245 | 2.40  | 4   |
| 2460   | Quinfamide           | Antiamebic                    | 62265-68-3  |      | 151     | 354 | 3.52  | 5   |
| 2461   | Quingestrone         | Progestogen                   | 67-95-8     |      | 95      | 383 | 6.87  | 2   |
| 2462   | Quinidine            | Antimalarial                  | 56-54-2     | Y    | 172     | 324 | 2.82  | 4   |
| 2463   | Quinine              | Antimalarial                  | 130-95-0    | Y    | 172     | 324 | 2.82  | 4   |
| 2464   | Quinocide            | Antimalarial                  | 525-61-1    |      | 46      | 259 | 2.74  | 4   |
| 2465   | Quinupramine         | Antidepressant                | 31721-17-2  |      | 150     | 304 | 4.98  | 2   |
| 2466   | Quipazine Maleate    | Antidepressant                | 4774-24-7   |      | 82      | 213 | 2.04  | 3   |
| 2467   | Rabeprazole          | Antiulcerative                | 117976-89-3 | Y    | 101     | 359 | 2.10  | 6   |
| 2468   | Racecadotril         | Antidiarrheal                 | 81110-73-8  | Y    | 89      | 385 | 3.74  | 5   |
| 2469   | Racemethol           | Decongestant                  | 89-78-1     |      | 35      | 156 | 3.22  | 1   |
| 2470   | Racemethorphan       | Antitussive                   | 510-53-2    |      | 82      | 271 | 3.89  | 2   |
| 2471   | Racemetirosine       | Unclassified                  | 658-48-0    |      | 320     | 195 | -0.01 | 4   |
| 2472   | Racemoramide         | Analgesic                     | 545-59-5    |      | 171     | 393 | 2.53  | 4   |
| 2473   | Racemorphan          | Analgesic                     | 297-90-5    |      | 225     | 257 | 3.26  | 2   |
| 2474   | Racephedrine         | Bronchodilator                | 90-81-3     |      | 78      | 165 | 1.08  | 2   |
| 2475   | Racephenicol         | Antibacterial                 | 847-25-6    |      | 165     | 356 | -0.27 | 6   |
| 2476   | Racepinephrine       | Bronchodilator                | 329-65-7    |      | 206     | 183 | -0.54 | 4   |
| 2477   | Rafoxanide           | Anthelmintic                  | 22662-39-1  |      | 169     | 626 | 9.07  | 4   |
| 2478   | Ragagliptazir        | Antidiabetic                  | 222834-30-2 |      | 90      | 419 | 4.10  | 6   |
| 2479   | Raloxifene           | Bone Resorption<br>Inhibitor  | 84449-90-1  | Y    | 145     | 474 | 4.57  | 5   |
| 2480   | Raltitrexed          | Antineoplastic                | 112887-68-0 |      | 182     | 458 | 0.86  | 10  |
| 2481   | Raluridine           | Antiviral                     | 119644-22-3 |      | 181     | 265 | 0.15  | 6   |
| 2482   | Ramelteon            | Anxiolytic                    | 196597-26-9 | Y    | 114     | 259 | 2.29  | 3   |
| 2483   | Ramifenazone         | Analgesic                     | 3615-24-5   |      | 81      | 245 | 1.39  | 4   |
| 2484   | Ramipril             | Antihypertensive              | 87333-19-5  | Y    | 110     | 417 | 4.37  | 7   |
| 2485   | Ramiprilat           | Antihypertensive              | 87269-97-4  | Y    | 109     | 388 | 4.76  | 7   |
| 2486   | Ramnodigin           | Cardiotonic                   | 33156-28-4  |      | 173     | 489 | 3.35  | 6   |
| 2487   | Ranimustine          | Antineoplastic                | 58994-96-0  |      | 111     | 328 | -0.48 | 10  |
| 2488   | Ranirestat           | Antidiabetic                  | 147254-64-6 | Y    | 191     | 420 | 2.38  | 7   |
| 2489   | Ranitidine           | Antiulcerative                | 66357-35-5  | Y    | 70      | 314 | -0.07 | 7   |
| 2490   | Rasagiline Mesylate  | Antiparkinsonian              | 136236-51-6 | Y    | 148     | 171 | 1.68  | 1   |

| Number | Common Name            | Indication                      | CAS Number  | Oral | MP (°C) | MW  | ClogP | HBA |
|--------|------------------------|---------------------------------|-------------|------|---------|-----|-------|-----|
| 2491   | Rathyronine            | Thyroid                         | 3130-96-9   |      | 234     | 651 | 3.91  | 5   |
| 2492   | Raxofelast             | Hepatic Protectant              | 128232-14-4 |      | 166     | 278 | 1.72  | 5   |
| 2493   | Razoxane               | Antianginal                     | 21416-67-1  |      | 238     | 268 | -0.91 | 8   |
| 2494   | Rebamipide             | Antiulcerative                  | 90098-04-7  | Y    | 253     | 371 | 2.56  | 6   |
| 2495   | Reglitazar             | Antidiabetic                    | 170861-63-9 |      | 155     | 392 | 1.98  | 7   |
| 2496   | Relomycin              | Antibacterial                   | 1404-48-4   |      | 174     | 918 | 0.37  | 18  |
| 2497   | Rentiapril             | Antihypertensive                | 80830-42-8  |      | 147     | 313 | 6.58  | 5   |
| 2498   | Repagermanium          | Immunomodulator                 | 12758-40-6  |      | 270     | 339 |       | 7   |
| 2499   | Repaglinide            | Antidiabetic                    | 135062-02-1 | Y    | 132     | 453 | 4.88  | 6   |
| 2500   | Reparixin              | Analgesic                       | 266359-83-5 | Y    | 104     | 283 | 2.99  | 4   |
| 2501   | Repirinast             | Antihistaminic                  | 73080-51-0  |      | 239     | 355 | 4.89  | 6   |
| 2502   | Rescimetol             | Antihypertensive                | 73573-42-9  |      | 260     | 591 | 3.94  | 10  |
| 2503   | Rescinnamine           | Antihypertensive                | 24815-24-5  |      | 239     | 635 | 3.65  | 11  |
| 2504   | Reserpine              | Antihypertensive                | 50-55-5     |      | 264     | 609 | 4.45  | 11  |
| 2505   | Resorantel             | Anthelmintic                    | 20788-07-2  |      | 229     | 308 | 4.73  | 4   |
| 2506   | Ribavirin              | Antiviral                       | 36791-04-5  | Y    | 172     | 244 | -1.85 | 9   |
| 2507   | Riboprine              | Antineoplastic                  | 7724-76-7   |      | 137     | 335 | 0.93  | 9   |
| 2508   | Ribostamycin           | Antibiotic                      | 25546-65-0  |      | 187     | 454 | -3.95 | 14  |
| 2509   | Ridogrel               | Antithrombotic                  | 110140-89-1 |      | 70      | 366 | 3.63  | 5   |
| 2510   | Rifampin               | Antibacterial                   | 13292-46-1  |      | 193     | 823 | 2.05  | 16  |
| 2511   | Rifamycin              | Antibiotic                      | 6998-60-3   | Y    | 300     | 698 | 1.22  | 13  |
| 2512   | Rifapentine            | Antibacterial                   | 61379-65-5  | Y    | 179     | 877 | 3.50  | 16  |
| 2513   | Rifaximin              | Antibacterial                   | 80621-81-4  | Y    | 203     | 786 | 3.35  | 14  |
| 2514   | Rilmenidine            | Antihypertensive                | 54187-04-1  | Y    | 107     | 180 | 1.48  | 3   |
| 2515   | Rilopirox              | Antifungal                      | 104153-37-9 |      | 167     | 358 | 3.86  | 5   |
| 2516   | Rilpivirine            | Antiviral                       | 500287-72-9 | Y    | 245     | 366 | 4.53  | 6   |
| 2517   | Riluzole               | Nootropic                       | 1744-22-5   | Y    | 116     | 234 | 2.92  | 3   |
| 2518   | Rimexolone             | Antiinflammatory                | 49697-38-3  |      | 263     | 371 | 3.86  | 3   |
| 2519   | Rimiterol              | Bronchodilator                  | 32953-89-2  |      | 204     | 223 | 0.74  | 4   |
| 2520   | Rimonabant             | Antiobesity                     | 168273-06-1 |      | 157     | 464 | 4.85  | 5   |
| 2521   | Rimoprogin             | Antibiotic                      | 37750-83-7  |      | 142     | 306 | 2.89  | 3   |
| 2522   | Risocaine              | Anesthetic                      | 94-12-2     |      | 74      | 179 | 2.35  | 3   |
| 2523   | Risperidone            | Antipsychotic                   | 106266-06-2 | Y    | 170     | 410 | 2.68  | 6   |
| 2524   | Ristianol Phosphate    | Immunomodulator                 | 78092-65-6  |      | 49      | 169 | -0.01 | 2   |
| 2525   | Ritanserlin            | Anxiolytic                      | 87051-43-2  |      | 146     | 478 | 5.20  | 4   |
| 2526   | Ritiometan             | Unclassified                    | 34914-39-1  |      | 171     | 286 | 2.65  | 6   |
| 2527   | Ritodrine              | Tocolytic                       | 26652-09-5  |      | 89      | 287 | 2.04  | 4   |
| 2528   | Ritolukast             | Bronchodilator                  | 111974-60-8 |      | 151     | 382 | 4.18  | 5   |
| 2529   | Ritropirronium Bromide | Neuromuscular<br>Blocking Agent | 58493-54-2  |      | 195     | 398 |       |     |
| 2530   | Rivaroxaban            | Anticoagulant                   | 366789-02-8 | Y    | 230     | 436 | 1.71  | 8   |
| 2531   | Rizatriptan Benzoate   | Antimigraine                    | 65-85-0     | Y    | 121     | 122 | 1.56  | 2   |
| 2532   | Robenidine             | Antibiotic                      | 25875-51-8  |      | 188     | 334 | 4.32  | 5   |

| Number | Common Name                      | Indication           | CAS Number  | Oral | MP (°C) | MW  | ClogP | HBA |
|--------|----------------------------------|----------------------|-------------|------|---------|-----|-------|-----|
| 2533   | Rocastine                        | Antihistaminic       | 91833-49-7  |      | 132     | 265 | 0.89  | 4   |
| 2534   | Rodocaine                        | Anesthetic           | 38821-80-6  |      | 97      | 321 | 3.74  | 3   |
| 2535   | Roflumilast                      | Bronchodilator       | 162401-32-3 | Y    | 157     | 403 | 2.31  | 5   |
| 2536   | Rokitamycin                      | Antibiotic           | 74014-51-0  |      | 116     | 828 | 3.62  | 16  |
| 2537   | Roletamide                       | Sedative             | 10078-46-3  |      | 135     | 289 | 1.78  | 5   |
| 2538   | Rolicyclidine                    | Cholinergic          | 2201-39-0   |      | 45      | 229 | 3.72  | 1   |
| 2539   | Rolicyprine                      | Antidepressant       | 2829-19-8   |      | 143     | 244 | 0.56  | 4   |
| 2540   | Rolipram                         | Antidepressant       | 61413-54-5  |      | 131     | 275 | 2.00  | 4   |
| 2541   | Rolitetracycline                 | Antibiotic           | 751-97-3    |      | 163     | 528 | 1.66  | 11  |
| 2542   | Rolziracetam                     | Nootropic            | 18356-28-0  |      | 179     | 139 | -1.11 | 3   |
| 2543   | Romazarit                        | Antiinflammatory     | 109543-76-2 | Y    | 167     | 310 | 2.71  | 5   |
| 2544   | Romifenone                       | Antiarrhythmic       | 38373-83-0  |      | 196     | 235 | 0.92  | 4   |
| 2545   | Romurtide                        | Immunomodulator      | 78113-36-7  |      | 177     | 887 | 3.75  | 19  |
| 2546   | Ronidazole                       | Antiprotozoal        | 7681-76-7   |      | 168     | 200 | -0.11 | 8   |
| 2547   | Ropivacaine                      | Anesthetic           | 84057-95-4  |      | 145     | 274 | 2.80  | 3   |
| 2548   | Ropizine                         | Anticonvulsant       | 3601-19-2   |      | 106     | 370 | 4.88  | 4   |
| 2549   | Rosaramicin                      | Antibacterial        | 35834-26-5  |      | 121     | 582 | 1.13  | 10  |
| 2550   | Rosiglitazone                    | Antidiabetic         | 122320-73-4 | Y    | 153     | 357 | 3.02  | 6   |
| 2551   | Rosoxacin                        | Antibacterial        | 40034-42-2  |      | 287     | 294 | 0.57  | 5   |
| 2552   | Rosuvastatin                     | Antihyperlipidemic   | 287714-41-4 | Y    | 162     | 482 | 0.89  | 9   |
| 2553   | Rotenone                         | Antibacterial        | 83-79-4     |      | 164     | 394 | 4.03  | 6   |
| 2554   | Roxatidine Acetate               | Antiulcerative       | 78628-28-1  |      | 60      | 348 | 2.00  | 6   |
| 2555   | Roxithromycin                    | Antibiotic           | 80214-83-1  | Y    | 124     | 837 | 2.84  | 17  |
| 2556   | Rubitecan                        | Antineoplastic       | 91421-42-0  |      | 187     | 393 | 0.33  | 9   |
| 2557   | Rufinamide                       | Anticonvulsant       | 106308-44-5 | Y    | 237     | 238 | 1.00  | 5   |
| 2558   | Rufloxacin                       | Antibiotic           | 101363-10-4 | Y    | 301     | 363 | 1.85  | 6   |
| 2559   | Rutamycin                        | Antifungal           | 1404-59-7   |      | 122     | 777 | 3.29  | 11  |
| 2560   | Rutin                            | Capillary Protectant | 153-18-4    |      | 191     | 611 | -0.90 | 16  |
| 2561   | Ruvazone                         | Analgesic            | 20228-27-7  |      | 185     | 250 | 1.44  | 6   |
| 2562   | Sabeluzole                       | Anticonvulsant       | 104383-17-7 |      | 102     | 416 | 4.26  | 5   |
| 2563   | Safingol                         | Antineoplastic       | 15639-50-6  |      | 110     | 302 | 5.33  | 3   |
| 2564   | Salacetamide                     | Analgesic            | 487-48-9    |      | 148     | 179 | 1.20  | 4   |
| 2565   | Salazosulfadimidine              | Antibiotic           | 2315-08-4   |      | 207     | 427 | 2.03  | 10  |
| 2566   | Salazosulfamide                  | Antibiotic           | 139-56-0    |      | 220     | 321 | 2.40  | 8   |
| 2567   | Salazosulfathiazole              | Antibiotic           | 515-58-2    |      | 200     | 404 | 2.97  | 9   |
| 2568   | Salcolex                         | Analgesic            | 2016-36-6   |      | 51      | 241 |       |     |
| 2569   | Salicin                          | Analgesic            | 138-52-3    |      | 200     | 286 | -1.23 | 7   |
| 2570   | Salicyl Alcohol                  | Anesthetic           | 90-01-7     |      | 79      | 124 | 0.75  | 2   |
| 2571   | Salicylamide                     | Analgesic            | 65-45-2     |      | 140     | 137 | 1.35  | 3   |
| 2572   | Salicylanilide                   | Antifungal           | 87-17-2     |      | 132     | 213 | 3.22  | 3   |
| 2573   | Salicylic Acid                   | Dermatologic         | 69-72-7     | Y    | 158     | 138 | 2.01  | 3   |
| 2574   | Salicylic Anhydride<br>Diacetate | Antiinflammatory     | 1466-82-6   |      | 84      | 342 | 1.88  | 7   |

| Number | Common Name          | Indication           | CAS Number  | Oral | MP (°C) | MW  | ClogP | HBA |
|--------|----------------------|----------------------|-------------|------|---------|-----|-------|-----|
| 2575   | Salicylic Acid       | Antiinflammatory     | 487-54-7    |      | 166     | 195 | 0.81  | 5   |
| 2576   | Salinazid            | Antibiotic           | 495-84-1    |      | 238     | 241 | 1.69  | 5   |
| 2577   | Salinomycin          | Antibiotic           | 53003-10-4  |      | 115     | 751 | 5.60  | 11  |
| 2578   | Salmeterol           | Bronchodilator       | 89365-50-4  |      | 76      | 416 | 3.71  | 5   |
| 2579   | Salmeterol Xinafoate | Bronchodilator       | 86-48-6     |      | 193     | 188 | 3.20  | 3   |
| 2580   | Salsalate            | Analgesic            | 552-94-3    | Y    | 149     | 258 | 2.76  | 5   |
| 2581   | Salverine            | Analgesic            | 6376-26-7   |      | 109     | 312 | 3.46  | 4   |
| 2582   | Sancycline           | Antibacterial        | 808-26-4    |      | 208     | 414 | 1.80  | 9   |
| 2583   | Santonin             | Anthelmintic         | 481-06-1    |      | 172     | 246 | 1.15  | 3   |
| 2584   | Saperconazole        | Antifungal           | 110588-57-3 |      | 190     | 673 | 4.53  | 12  |
| 2585   | Sarafloxacin         | Antibiotic           | 98105-99-8  | Y    | 284     | 385 | 0.67  | 6   |
| 2586   | Sarcolysin           | Antineoplastic       | 531-76-0    |      | 182     | 305 | 0.54  | 4   |
| 2587   | Sarmazenil           | Anxiolytic           | 78771-13-8  |      | 224     | 320 | 2.69  | 6   |
| 2588   | Satigrel             | Antithrombotic       | 111753-73-2 |      | 125     | 337 | 3.93  | 5   |
| 2589   | Satranidazole        | Antiamebic           | 56302-13-7  |      | 187     | 289 | -0.84 | 10  |
| 2590   | Saviprazole          | Antiulcerative       | 121617-11-6 |      | 140     | 461 | 3.20  | 5   |
| 2591   | Scopolamine          | Antispasmodic        | 51-34-3     |      | 59      | 303 | 0.69  | 5   |
| 2592   | Seclazone            | Antiinflammatory     | 29050-11-1  |      | 149     | 226 | 1.89  | 4   |
| 2593   | Secnidazole          | Antiamebic           | 3366-95-8   | Y    | 76      | 185 | 0.22  | 6   |
| 2594   | Secobarbital         | Sedative             | 76-73-3     | Y    | 99      | 238 | 2.30  | 5   |
| 2595   | Sedecamycin          | Antibacterial        | 23477-98-7  |      | 209     | 502 | 1.60  | 9   |
| 2596   | Segesterone          | Progestogen          | 7690-08-6   |      | 233     | 328 | 2.64  | 3   |
| 2597   | Selegiline           | Antiparkinsonian     | 14611-51-9  | Y    | 138     | 187 | 2.68  | 1   |
| 2598   | Selfotel             | Antipsychotic        | 110347-85-8 |      | 291     | 223 | -1.05 | 6   |
| 2599   | Seliciclib           | Antineoplastic       | 186692-46-6 | Y    | 108     | 354 | 1.53  | 7   |
| 2600   | Selodenoson          | Antiarrhythmic       | 110299-05-3 |      | 98      | 376 | 2.29  | 10  |
| 2601   | Semaxanib            | Antineoplastic       | 194413-58-6 |      | 221     | 238 | 3.09  | 3   |
| 2602   | Semotiadil           | Antianginal          | 116476-13-2 |      | 135     | 537 | 3.80  | 8   |
| 2603   | Sequifenadine        | Antihistaminic       | 57734-69-7  |      | 239     | 321 | 3.76  | 2   |
| 2604   | Seratrodast          | Antiinflammatory     | 112665-43-7 | Y    | 129     | 354 | 4.63  | 4   |
| 2605   | Serazapine           | Anxiolytic           | 115313-22-9 |      | 158     | 361 | 1.99  | 5   |
| 2606   | Sertaconazole        | Antifungal           | 99592-32-2  |      | 147     | 438 | 5.77  | 3   |
| 2607   | Sertindole           | Antipsychotic        | 106516-24-9 | Y    | 166     | 441 | 3.67  | 5   |
| 2608   | Setastine            | Antihistaminic       | 64294-95-7  | Y    | 171     | 358 | 5.52  | 2   |
| 2609   | Setiptiline          | Antidepressant       | 57262-94-9  |      | 140     | 261 | 3.64  | 1   |
| 2610   | Sezolamide           | Antiglaucoma         | 123308-22-5 |      | 220     | 338 | 2.00  | 6   |
| 2611   | Siccanin             | Antifungal           | 22733-60-4  |      | 133     | 342 | 6.10  | 3   |
| 2612   | Sifaprazine          | Sedative             | 131635-06-8 |      | 78      | 266 | 3.16  | 2   |
| 2613   | Siguazodan           | Cardiotonic          | 115344-47-3 |      | 269     | 284 | 0.54  | 7   |
| 2614   | Silandrone           | Androgen             | 5055-42-5   |      | 134     | 361 | 5.28  | 2   |
| 2615   | Sildenafil           | Erectile Dysfunction | 139755-83-2 | Y    | 188     | 475 | 2.47  | 10  |
| 2616   | Silibinin            | Hepatic Protectant   | 22888-70-6  |      | 160     | 482 | 4.23  | 10  |
| 2617   | Silidianin           | Hepatic Protectant   | 29782-68-1  |      | 186     | 482 | 1.41  | 10  |



| Number | Common Name         | Indication            | CAS Number  | Oral | MP (°C) | MW  | ClogP | HBA |
|--------|---------------------|-----------------------|-------------|------|---------|-----|-------|-----|
| 2618   | Siltenzepine        | Anticonvulsant        | 98374-54-0  |      | 190     | 390 | 1.22  | 7   |
| 2619   | Silver Sulfadiazine | Antibacterial         | 22199-08-2  |      | 285     | 357 |       |     |
| 2620   | Simetride           | Analgesic             | 154-82-5    |      | 134     | 499 | 2.47  | 8   |
| 2621   | Simfibrate          | Antihyperlipidemic    | 14929-11-4  |      | 52      | 469 | 6.75  | 6   |
| 2622   | Simtrazene          | Antineoplastic        | 5579-27-1   |      | 138     | 240 | 3.40  | 4   |
| 2623   | Simvastatin         | Antihyperlipidemic    | 79902-63-9  | Y    | 137     | 419 | 4.72  | 5   |
| 2624   | Sirolimus           | Immunomodulator       | 53123-88-9  | Y    | 184     | 914 | 4.26  | 14  |
| 2625   | Sisomicin           | Antibacterial         | 32385-11-8  |      | 87      | 448 | -3.33 | 12  |
| 2626   | Sitogluside         | Unclassified          | 474-58-8    |      | 287     | 577 | 8.62  | 6   |
| 2627   | Sitosterol          | Steroid               | 83-46-5     |      | 137     | 415 | 10.48 | 1   |
| 2628   | Sivelestat          | Respiratory Stimulant | 127373-66-4 |      | 215     | 434 | 2.71  | 9   |
| 2629   | Soblidotin          | Antineoplastic        | 149606-27-9 |      | 76      | 702 | 4.82  | 11  |
| 2630   | Sobuzoxane          | Antineoplastic        | 98631-95-9  |      | 131     | 515 | -2.76 | 14  |
| 2631   | Sofalcone           | Antiulcerative        | 64506-49-6  |      | 144     | 451 | 5.18  | 6   |
| 2632   | Soneclosan          | Antibacterial         | 3380-30-1   |      | 138     | 255 | 4.92  | 2   |
| 2633   | Sorafenib           | Antineoplastic        | 284461-73-0 | Y    | 209     | 465 | 4.82  | 7   |
| 2634   | Sorbinicate         | Antihyperlipidemic    | 6184-06-1   |      | 212     | 813 | 3.83  | 18  |
| 2635   | Sorbinil            | Antidiabetic          | 68367-52-2  |      | 241     | 236 | 0.49  | 5   |
| 2636   | Soretolide          | Anticonvulsant        | 130403-08-6 |      | 145     | 230 | 1.30  | 4   |
| 2637   | Sorivudine          | Antiviral             | 77181-69-2  |      | 191     | 349 | -0.03 | 8   |
| 2638   | Sotalol             | Antianginal           | 3930-20-9   | Y    | 207     | 272 | 0.24  | 5   |
| 2639   | Spaglumic Acid      | Antihistaminic        | 4910-46-7   |      | 113     | 304 | -3.56 | 10  |
| 2640   | Sparfloxacin        | Antibiotic            | 110871-86-8 | Y    | 260     | 392 | 2.60  | 7   |
| 2641   | Sparsomycin         | Antineoplastic        | 1404-64-4   |      | 207     | 361 | -1.53 | 8   |
| 2642   | Sparteine           | Cardiotonic           | 90-39-1     |      | 112     | 234 | 2.84  | 2   |
| 2643   | Spectinomycin       | Antibiotic            | 1695-77-8   |      | 185     | 332 | 0.75  | 9   |
| 2644   | Spiclomazine        | Antipsychotic         | 24527-27-3  |      | 155     | 446 | 6.35  | 4   |
| 2645   | Spiperone           | Antipsychotic         | 749-02-0    |      | 192     | 395 | 3.25  | 5   |
| 2646   | Spiraprilat         | Antihypertensive      | 83602-05-5  |      | 164     | 439 | 6.26  | 7   |
| 2647   | Spirogermanium      | Antineoplastic        | 41992-23-8  |      | 288     | 341 | 5.26  | 2   |
| 2648   | Spiroxatrine        | Vasodilator           | 1054-88-2   |      | 217     | 379 | 3.28  | 6   |
| 2649   | Spizofurone         | Antiulcerative        | 72492-12-7  |      | 105     | 202 | 1.28  | 3   |
| 2650   | Stallimycin         | Antibacterial         | 636-47-5    |      | 155     | 482 | 0.66  | 13  |
| 2651   | Stanolone           | Androgen              | 521-18-6    |      | 180     | 290 | 3.93  | 2   |
| 2652   | Stanozolol          | Steroid               | 10418-03-8  |      | 236     | 328 | 5.41  | 3   |
| 2653   | Stavudine           | Antiviral             | 3056-17-5   | Y    | 165     | 224 | -0.65 | 6   |
| 2654   | Stearylsulfamide    | Diuretic              | 498-78-2    |      | 100     | 439 | 7.19  | 5   |
| 2655   | Stenbolone Acetate  | Steroid               | 1242-56-4   |      | 151     | 344 | 4.68  | 3   |
| 2656   | Stepronin           | Mucolytic             | 72324-18-6  |      | 169     | 273 | 1.24  | 3   |
| 2657   | Stevaladil          | Unclassified          | 6535-03-1   |      | 95      | 448 | 6.18  | 5   |
| 2658   | Stilbazium Iodide   | Anthelmintic          | 3784-99-4   |      | 283     | 578 |       |     |
| 2659   | Stilonium Iodide    | Antispasmodic         | 77257-42-2  |      | 212     | 451 |       |     |
| 2660   | Stiripentol         | Anticonvulsant        | 49763-96-4  | Y    | 74      | 234 | 3.78  | 3   |

| Number | Common Name           | Indication       | CAS Number | Oral | MP (°C) | MW  | ClogP | HBA |
|--------|-----------------------|------------------|------------|------|---------|-----|-------|-----|
| 2661   | Streptomycin Sulfate  | Antibiotic       | 57-92-1    |      | 194     | 582 | -1.22 | 19  |
| 2662   | Streptonigrin         | Antineoplastic   | 3930-19-6  |      | 263     | 506 | 0.09  | 12  |
| 2663   | Streptozocin          | Antineoplastic   | 18883-66-4 |      | 115     | 265 | -1.33 | 10  |
| 2664   | Strinoline            | Antiarrhythmic   | 39862-58-3 |      | 162     | 182 | 0.94  | 4   |
| 2665   | Strychnine            | Nootropic        | 57-24-9    |      | 280     | 334 | 1.59  | 4   |
| 2666   | Subathizone           | Antibacterial    | 121-55-1   |      | 229     | 271 | 1.53  | 5   |
| 2667   | Succimer              | Antidote         | 304-55-2   |      | 202     | 182 | 1.05  | 4   |
| 2668   | Succinylchlorimide    | Anticonvulsant   | 128-09-6   |      | 148     | 134 | -0.76 | 3   |
| 2669   | Succinylsulfathiazole | Antibiotic       | 116-43-8   |      | 189     | 355 | 0.19  | 8   |
| 2670   | Succisulfone          | Antibiotic       | 5934-14-5  |      | 157     | 348 | 0.77  | 7   |
| 2671   | Suclofenide           | Anticonvulsant   | 30279-49-3 |      | 206     | 365 | 1.15  | 6   |
| 2672   | Sucralose             | Antiulcerative   | 56038-13-2 |      | 130     | 398 | 0.23  | 8   |
| 2673   | Sucralox              | Unclassified     | 57-50-1    |      | 181     | 342 | -4.49 | 11  |
| 2674   | Sudoxicam             | Antiinflammatory | 34042-85-8 |      | 232     | 337 | 2.36  | 7   |
| 2675   | Sufentanil            | Analgesic        | 56030-54-7 |      | 100     | 387 | 3.95  | 4   |
| 2676   | Sulazepam             | Anxiolytic       | 2898-13-7  |      | 157     | 301 | 2.97  | 2   |
| 2677   | Sulbactam             | Antibiotic       | 68373-14-8 |      | 155     | 233 | 0.39  | 6   |
| 2678   | Sulbenicillin         | Antibiotic       | 41744-40-5 |      | 197     | 414 | -0.51 | 9   |
| 2679   | Sulbenox              | Steroid          | 58095-31-1 |      | 246     | 210 | 0.69  | 4   |
| 2680   | Sulbentine            | Antifungal       | 350-12-9   |      | 93      | 314 | 3.90  | 2   |
| 2681   | Sulclamide            | Antitussive      | 2455-92-7  |      | 221     | 235 | -0.26 | 5   |
| 2682   | Sulconazole           | Antifungal       | 61318-90-9 |      | 131     | 398 | 4.36  | 2   |
| 2683   | Sulfabenz             | Antibacterial    | 127-77-5   |      | 197     | 248 | 1.71  | 4   |
| 2684   | Sulfabenzamide        | Antibacterial    | 127-71-9   |      | 182     | 276 | 1.74  | 5   |
| 2685   | Sulfacarbamide        | Antibiotic       | 547-44-4   |      | 151     | 215 | -0.73 | 6   |
| 2686   | Sulfacetamide         | Antibiotic       | 144-80-9   |      | 182     | 214 | -0.96 | 5   |
| 2687   | Sulfachlorpyridazine  | Antibiotic       | 80-32-0    |      | 191     | 285 | 0.68  | 6   |
| 2688   | Sulfaclomide          | Antibacterial    | 4015-18-3  |      | 226     | 313 | 0.92  | 6   |
| 2689   | Sulfacorazole         | Unclassified     | 54063-55-7 |      | 224     | 363 | 2.32  | 6   |
| 2690   | Sulfaclozine          | Antibiotic       | 102-65-8   |      | 235     | 285 | 0.88  | 6   |
| 2691   | Sulfacytine           | Antibacterial    | 17784-12-2 |      | 167     | 294 | -0.33 | 7   |
| 2692   | Sulfadiazine          | Antibiotic       | 68-35-9    |      | 255     | 250 | -0.07 | 6   |
| 2693   | Sulfadicramide        | Antibiotic       | 115-68-4   |      | 181     | 254 | 0.86  | 5   |
| 2694   | Sulfadimethoxine      | Antibiotic       | 122-11-2   |      | 199     | 310 | 0.73  | 8   |
| 2695   | Sulfadoxine           | Antibiotic       | 2447-57-6  |      | 192     | 310 | 0.46  | 8   |
| 2696   | Sulfaethidole         | Antibiotic       | 94-19-9    |      | 185     | 284 | 1.03  | 6   |
| 2697   | Sulfaguanidine        | Antibiotic       | 57-67-0    |      | 189     | 214 | -1.22 | 6   |
| 2698   | Sulfaguanole          | Antibiotic       | 27031-08-9 |      | 232     | 309 | 0.15  | 8   |
| 2699   | Sulfalene             | Antibacterial    | 152-47-6   |      | 172     | 280 | 0.88  | 7   |
| 2700   | Sulfaloxic Acid       | Antibiotic       | 14376-16-0 |      | 163     | 393 | -0.37 | 10  |
| 2701   | Sulfamerazine         | Antibiotic       | 127-79-7   |      | 234     | 264 | 0.11  | 6   |
| 2702   | Sulfameter            | Antibiotic       | 651-06-9   |      | 212     | 280 | 0.41  | 7   |
| 2703   | Sulfamethazine        | Antibiotic       | 57-68-1    |      | 178     | 278 | 0.30  | 6   |

| Number | Common Name             | Indication       | CAS Number  | Oral | MP (°C) | MW  | ClogP | HBA |
|--------|-------------------------|------------------|-------------|------|---------|-----|-------|-----|
| 2704   | Sulfamethizole          | Antibiotic       | 144-82-1    |      | 205     | 270 | 0.52  | 6   |
| 2705   | Sulfamethoxazole        | Antibiotic       | 723-46-6    |      | 170     | 253 | 0.66  | 6   |
| 2706   | Sulfamethoxy pyridazine | Antibiotic       | 80-35-3     |      | 182     | 280 | 0.32  | 7   |
| 2707   | Sulfametomidine         | Antibiotic       | 3772-76-7   |      | 146     | 294 | 1.54  | 7   |
| 2708   | Sulfametrole            | Antibiotic       | 32909-92-5  |      | 155     | 286 | 0.72  | 7   |
| 2709   | Sulfamonomethoxine      | Antibiotic       | 1220-83-3   |      | 202     | 280 | 1.03  | 7   |
| 2710   | Sulfamoxole             | Antibacterial    | 729-99-7    |      | 196     | 267 | 0.68  | 6   |
| 2711   | Sulfanilamide           | Antibiotic       | 63-74-1     |      | 165     | 172 | -0.67 | 4   |
| 2712   | Sulfanilate Zinc        | Antibiotic       | 121-57-3    |      | 288     | 173 | -1.57 | 4   |
| 2713   | Sulfanitran             | Antibacterial    | 122-16-7    |      | 240     | 335 | 2.44  | 8   |
| 2714   | Sulfaperin              | Antibiotic       | 599-88-2    |      | 259     | 264 | 0.28  | 6   |
| 2715   | Sulfaphenazole          | Antibiotic       | 526-08-9    |      | 179     | 314 | 1.39  | 6   |
| 2716   | Sulfaproxyline          | Antibiotic       | 116-42-7    |      | 180     | 334 | 2.67  | 6   |
| 2717   | Sulfapyrazine           | Antibiotic       | 116-44-9    |      | 254     | 250 | 0.05  | 6   |
| 2718   | Sulfapyridine           | Antibiotic       | 144-83-2    |      | 190     | 249 | 0.47  | 5   |
| 2719   | Sulfaquinoxaline        | Antiprotozoal    | 59-40-5     |      | 254     | 300 | 1.43  | 6   |
| 2720   | Sulfasalazine           | Antiinflammatory | 599-79-1    | Y    | 231     | 398 | 3.05  | 9   |
| 2721   | Sulfasomizole           | Antibacterial    | 632-00-8    |      | 192     | 269 | 0.87  | 5   |
| 2722   | Sulfasuccinamide        | Antibiotic       | 3563-14-2   |      | 214     | 272 | -0.40 | 7   |
| 2723   | Sulfasymazine           | Antibiotic       | 1984-94-7   |      | 189     | 307 | 2.02  | 7   |
| 2724   | Sulfathiazole           | Antibiotic       | 72-14-0     |      | 201     | 255 | 0.05  | 5   |
| 2725   | Sulfathiourea           | Antibiotic       | 515-49-1    |      | 182     | 231 | -0.32 | 5   |
| 2726   | Sulfatroxazole          | Antibacterial    | 23256-23-7  |      | 194     | 267 | 1.00  | 6   |
| 2727   | Sulfatrozole            | Antiprotozoal    | 13369-07-8  |      | 124     | 300 | 1.23  | 7   |
| 2728   | Sulfazamet              | Antibacterial    | 852-19-7    |      | 187     | 328 | 1.47  | 6   |
| 2729   | Sulfinalol              | Antihypertensive | 66264-77-5  |      | 103     | 378 | 1.11  | 5   |
| 2730   | Sulfinyprazone          | Antiurolithic    | 57-96-5     | Y    | 137     | 404 | 1.89  | 5   |
| 2731   | Sulfiram                | Ectoparasiticide | 95-05-6     |      | 31      | 264 | 3.45  | 2   |
| 2732   | Sulfisomidine           | Antibiotic       | 515-64-0    |      | 238     | 278 | 0.58  | 6   |
| 2733   | Sulfisoxazole           | Antibiotic       | 127-69-5    | Y    | 186     | 267 | 1.01  | 6   |
| 2734   | Sulfisoxazole Acetyl    | Antibacterial    | 80-74-0     |      | 192     | 309 | 2.15  | 7   |
| 2735   | Sulfonethylmethane      | Sedative         | 76-20-0     |      | 74      | 242 | 0.95  | 4   |
| 2736   | Sulfonmethane           | Sedative         | 115-24-2    |      | 126     | 228 | 0.44  | 4   |
| 2737   | Sulforidazine           | Antipsychotic    | 14759-06-9  |      | 119     | 403 | 4.50  | 4   |
| 2738   | Sulfosalicylic Acid     | Antiinflammatory | 97-05-2     |      | 120     | 218 | -0.84 | 6   |
| 2739   | Sulindac                | Antineoplastic   | 38194-50-2  | Y    | 177     | 356 | 2.55  | 3   |
| 2740   | Sulisobenzone           | Dermatologic     | 4065-45-6   |      | 145     | 308 | 0.99  | 6   |
| 2741   | Sulmazole               | Cardiotonic      | 73384-60-8  |      | 204     | 287 | -0.83 | 5   |
| 2742   | Suloctidil              | Vasodilator      | 54767-75-8  |      | 63      | 338 | 5.86  | 2   |
| 2743   | Sulofenur               | Antineoplastic   | 110311-27-8 |      | 171     | 351 | 4.17  | 5   |
| 2744   | Sulpiride               | Antipsychotic    | 15676-16-1  | Y    | 181     | 341 | 0.78  | 7   |
| 2745   | Sulthiame               | Anticonvulsant   | 61-56-3     |      | 181     | 290 | 0.56  | 6   |
| 2746   | Sultopride              | Antipsychotic    | 53583-79-2  | Y    | 182     | 354 | 1.39  | 6   |

| Number | Common Name           | Indication                      | CAS Number  | Oral | MP (°C) | MW  | ClogP | HBA |
|--------|-----------------------|---------------------------------|-------------|------|---------|-----|-------|-----|
| 2747   | Sultroponium          | Antispasmodic                   | 15130-91-3  |      | 220     | 412 |       |     |
| 2748   | Sumatriptan           | Antimigraine                    | 103628-46-2 |      | 170     | 295 | 0.44  | 5   |
| 2749   | Sunitinib             | Antineoplastic                  | 557795-19-4 | Y    | 190     | 398 | 2.27  | 6   |
| 2750   | Suplatast Tosilate    | Antihistaminic                  | 94055-76-2  | Y    | 79      | 500 |       |     |
| 2751   | Suprofen              | Antiinflammatory                | 40828-46-4  |      | 124     | 260 | 2.18  | 3   |
| 2752   | Suriclone             | Anxiolytic                      | 53813-83-5  |      | 280     | 478 | 3.81  | 8   |
| 2753   | Suritozole            | Antidepressant                  | 110623-33-1 |      | 127     | 223 | 1.74  | 3   |
| 2754   | Suronacrine Maleate   | Neuromuscular<br>Blocking Agent | 104675-35-6 |      | 159     | 304 | 2.45  | 3   |
| 2755   | Suxamethonium Bromide | Muscle Relaxant<br>(Skeletal)   | 55-94-7     |      | 219     | 450 |       |     |
| 2756   | Suxibuzone            | Antiinflammatory                | 27470-51-5  |      | 127     | 438 | 3.14  | 8   |
| 2757   | Symclosene            | Antibacterial                   | 87-90-1     |      | 245     | 232 | -0.23 | 6   |
| 2758   | Syrosingopine         | Antihypertensive                | 84-36-6     |      | 177     | 667 | 4.66  | 13  |
| 2759   | Tacedinaline          | Antineoplastic                  | 112522-64-2 |      | 230     | 269 | 3.06  | 5   |
| 2760   | Tacrine               | Nootropic                       | 321-64-2    | Y    | 183     | 198 | 2.56  | 2   |
| 2761   | Tacrolimus            | Immunomodulator                 | 104987-11-3 | Y    | 114     | 804 | 4.79  | 13  |
| 2762   | Tadalafil             | Erectile Dysfunction            | 171596-29-5 | Y    | 303     | 389 | 2.71  | 7   |
| 2763   | Taglutimide           | Sedative                        | 14166-26-8  |      | 235     | 276 | 0.11  | 6   |
| 2764   | Talastine             | Antihistaminic                  | 16188-61-7  |      | 108     | 307 | 2.31  | 4   |
| 2765   | Talbutal              | Sedative                        | 115-44-6    |      | 109     | 224 | 1.79  | 5   |
| 2766   | Taleranol             | Pituitary                       | 42422-68-4  |      | 155     | 322 | 4.65  | 5   |
| 2767   | Talinolol             | Antihypertensive                | 57460-41-0  | Y    | 143     | 363 | 2.98  | 6   |
| 2768   | Talnetant             | Antispasmodic                   | 174636-32-9 |      | 126     | 382 | 5.80  | 4   |
| 2769   | Talniflumate          | Antiinflammatory                | 66898-62-2  | Y    | 166     | 414 | 4.73  | 6   |
| 2770   | Talosalate            | Analgesic                       | 66898-60-0  |      | 86      | 312 | 1.79  | 6   |
| 2771   | Talotrexin Ammonium   | Antineoplastic                  | 113857-87-7 |      | 208     | 574 | -0.46 | 15  |
| 2772   | Taltirelin            | Pituitary                       | 103300-74-9 | Y    | 74      | 405 | -3.52 | 12  |
| 2773   | Taltobulin            | Antineoplastic                  | 228266-40-8 |      | 136     | 474 | 5.03  | 7   |
| 2774   | Tamibarotene          | Immunomodulator                 | 94497-51-5  | Y    | 232     | 351 | 5.52  | 4   |
| 2775   | Tamoxifen             | Antineoplastic                  | 10540-29-1  | Y    | 96      | 372 | 5.13  | 2   |
| 2776   | Tamsulosin            | Antineoplastic                  | 106133-20-4 | Y    | 229     | 409 | 2.14  | 7   |
| 2777   | Tanaproget            | Contraceptive                   | 304853-42-7 |      | 227     | 297 | 3.62  | 4   |
| 2778   | Tandospirone Citrate  | Anxiolytic                      | 87760-53-0  | Y    | 113     | 383 | 1.09  | 7   |
| 2779   | Taniplon              | Sedative                        | 106073-01-2 |      | 220     | 285 | 2.47  | 7   |
| 2780   | Tanomastat            | Antirheumatic                   | 179545-77-8 |      | 111     | 411 | 6.15  | 3   |
| 2781   | Tartaric Acid         | Antibacterial                   | 87-69-4     |      | 169     | 150 | -1.08 | 6   |
| 2782   | Taurocholic Acid      | Choleretic                      | 81-24-3     |      | 125     | 516 | 0.25  | 8   |
| 2783   | Taurolidine           | Antibacterial                   | 19388-87-5  |      | 155     | 284 | -0.72 | 8   |
| 2784   | Tazarotene            | Dermatologic                    | 118292-40-3 |      | 98      | 351 | 5.99  | 3   |
| 2785   | Tebanicline Tosylate  | Analgesic                       | 198283-73-7 |      | 117     | 199 | 1.18  | 3   |
| 2786   | Tebipenem Pivoxil     | Antibiotic                      | 161715-24-8 | Y    | 141     | 498 | -0.60 | 9   |
| 2787   | Tebuquine             | Antimalarial                    | 74129-03-6  |      | 228     | 466 | 4.28  | 4   |

| Number | Common Name         | Indication       | CAS Number  | Oral | MP (°C) | MW  | ClogP | HBA |
|--------|---------------------|------------------|-------------|------|---------|-----|-------|-----|
| 2788   | Tecastemizole       | Antihistaminic   | 75970-99-9  |      | 290     | 324 | 3.29  | 4   |
| 2789   | Teclotiazide        | Diuretic         | 4267-05-4   |      | 287     | 415 | 0.63  | 7   |
| 2790   | Teclozan            | Antiamoebic      | 5560-78-1   |      | 141     | 502 | 0.44  | 6   |
| 2791   | Tegafur             | Antineoplastic   | 17902-23-7  | Y    | 169     | 200 | -0.60 | 5   |
| 2792   | Telbivudine         | Antiviral        | 3424-98-4   | Y    | 186     | 242 | -0.84 | 7   |
| 2793   | Telenzepine         | Antiulcerative   | 80880-90-6  |      | 264     | 370 | -0.25 | 6   |
| 2794   | Telmisartan         | Antihypertensive | 144701-48-4 | Y    | 261     | 515 | 6.48  | 6   |
| 2795   | Temazepam           | Sedative         | 846-50-4    | Y    | 120     | 301 | 2.19  | 4   |
| 2796   | Temefos             | Ectoparasiticide | 3383-96-8   | Y    | 30      | 466 | 5.96  | 6   |
| 2797   | Temocapril          | Antihypertensive | 111902-57-9 | Y    | 168     | 477 | 6.57  | 7   |
| 2798   | Temocaprilat        | Antihypertensive | 110221-53-9 |      | 246     | 449 | 7.16  | 7   |
| 2799   | Temozolomide        | Antineoplastic   | 85622-93-1  | Y    | 212     | 194 | -1.27 | 8   |
| 2800   | Tenamfetamine       | Nootropic        | 4764-17-4   |      | 179     | 179 | 1.64  | 3   |
| 2801   | Tenatoprazole       | Antihypertensive | 113712-98-4 |      | 175     | 346 | 0.62  | 7   |
| 2802   | Tenidap             | Antiinflammatory | 120210-48-2 |      | 230     | 321 | 1.59  | 5   |
| 2803   | Teniposide          | Antineoplastic   | 29767-20-2  | Y    | 244     | 657 | 1.56  | 13  |
| 2804   | Tenonitrozoole      | Antiprotozoal    | 3810-35-3   |      | 254     | 255 | 3.07  | 6   |
| 2805   | Tenoxicam           | Antiinflammatory | 59804-37-4  | Y    | 210     | 337 | 0.01  | 7   |
| 2806   | Tenylidone          | Diuretic         | 893-01-6    |      | 143     | 286 | 4.54  | 1   |
| 2807   | Tepoxalin           | Dermatologic     | 103475-41-8 |      | 126     | 386 | 3.16  | 6   |
| 2808   | Terazosin           | Antihypertensive | 63590-64-7  | Y    | 273     | 387 | 0.80  | 9   |
| 2809   | Terbequinil         | Antipsychotic    | 113079-82-6 |      | 159     | 274 | -0.04 | 5   |
| 2810   | Terbinafine         | Antifungal       | 91161-71-6  | Y    | 204     | 291 | 5.58  | 1   |
| 2811   | Terbuficin          | Unclassified     | 15534-92-6  |      | 212     | 469 | 5.32  | 4   |
| 2812   | Terbutaline         | Bronchodilator   | 23031-25-6  | Y    | 120     | 225 | 0.70  | 4   |
| 2813   | Terconazole         | Antifungal       | 67915-31-5  |      | 126     | 532 | 4.19  | 8   |
| 2814   | Terfenadine         | Antihistaminic   | 50679-08-8  |      | 149     | 472 | 5.62  | 3   |
| 2815   | Terguride           | Antiparkinsonian | 37686-84-3  | Y    | 205     | 340 | 2.20  | 5   |
| 2816   | Terizidone          | Antibacterial    | 25683-71-0  |      | 205     | 302 | -3.70 | 8   |
| 2817   | Ternidazole         | Antiprotozoal    | 1077-93-6   |      | 130     | 185 | -0.38 | 6   |
| 2818   | Terofenamate        | Antiinflammatory | 29098-15-5  |      | 73      | 354 | 5.65  | 4   |
| 2819   | Teroxirone          | Antineoplastic   | 59653-73-5  |      | 103     | 297 | -1.43 | 9   |
| 2820   | Terpin              | Expectorant      | 80-53-5     |      | 117     | 172 | 1.06  | 2   |
| 2821   | Tertatolol          | Antihypertensive | 83688-84-0  | Y    | 71      | 295 | 1.03  | 3   |
| 2822   | Tesetaxel           | Antineoplastic   | 333754-36-2 |      | 148     | 882 | 4.51  | 16  |
| 2823   | Testolactone        | Antineoplastic   | 968-93-4    |      | 213     | 300 | 2.23  | 3   |
| 2824   | Testosterone        | Androgen         | 58-22-0     |      | 154     | 288 | 3.18  | 2   |
| 2825   | Tetrabarbital       | Sedative         | 76-23-3     |      | 117     | 240 | 2.69  | 5   |
| 2826   | Tetrabenazine       | Antipsychotic    | 58-46-8     | Y    | 127     | 317 | 2.93  | 4   |
| 2827   | Tetracaine          | Anesthetic       | 94-24-6     |      | 140     | 264 | 3.75  | 4   |
| 2828   | Tetracycline        | Antibiotic       | 60-54-8     |      | 173     | 444 | 0.62  | 10  |
| 2829   | Tetradonium Bromide | Antiarrhythmic   | 1119-97-7   |      | 247     | 336 |       |     |
| 2830   | Tetragastrin        | Antispasmodic    | 1947-37-1   |      | 221     | 597 | 1.87  | 12  |

| Number | Common Name               | Indication                    | CAS Number | Oral | MP (°C) | MW  | ClogP | HBA |
|--------|---------------------------|-------------------------------|------------|------|---------|-----|-------|-----|
| 2831   | Tetrahydrozoline          | Decongestant                  | 84-22-0    |      | 119     | 200 | 2.85  | 2   |
| 2832   | Tetramisole               | Anthelmintic                  | 5036-02-2  |      | 90      | 204 | 1.84  | 2   |
| 2833   | Tetrantoin                | Anticonvulsant                | 52094-70-9 |      | 268     | 216 | 1.35  | 4   |
| 2834   | Tetrazepam                | Muscle Relaxant<br>(Skeletal) | 10379-14-3 |      | 142     | 289 | 2.63  | 3   |
| 2835   | Tetroxoprim               | Antibacterial                 | 53808-87-0 |      | 156     | 334 | 0.29  | 8   |
| 2836   | Tetrydamine               | Analgesic                     | 17289-49-5 |      | 93      | 165 | -0.42 | 3   |
| 2837   | Thalidomide               | Immunomodulator               | 50-35-1    | Y    | 273     | 258 | 0.33  | 6   |
| 2838   | Thebacon                  | Analgesic                     | 466-90-0   |      | 153     | 341 | 1.17  | 5   |
| 2839   | Thenalidine               | Antihistaminic                | 86-12-4    |      | 92      | 286 | 2.91  | 2   |
| 2840   | Thenium Closylate         | Anthelmintic                  | 4304-40-9  |      | 171     | 454 | 2.55  |     |
| 2841   | Theobromine               | Diuretic                      | 83-67-0    |      | 341     | 180 | -1.06 | 6   |
| 2842   | Theofibrate               | Antihyperlipidemic            | 54504-70-0 |      | 134     | 421 | 2.63  | 9   |
| 2843   | Theophylline              | Bronchodilator                | 58-55-9    | Y    | 272     | 180 | -0.28 | 6   |
| 2844   | Thiabendazole             | Anthelmintic                  | 148-79-8   |      | 300     | 201 | 2.47  | 3   |
| 2845   | Thiacetarsamide           | Anthelmintic                  | 531-72-6   |      | 160     | 377 |       | 6   |
| 2846   | Thialbarbital             | Anesthetic                    | 467-36-7   |      | 149     | 264 | 2.15  | 4   |
| 2847   | Thiambutosine             | Antibiotic                    | 500-89-0   |      | 120     | 343 | 3.80  | 4   |
| 2848   | Thiamphenicol             | Antibiotic                    | 15318-45-3 |      | 165     | 356 | -0.27 | 6   |
| 2849   | Thiamylal                 | Anesthetic                    | 77-27-0    |      | 133     | 254 | 2.18  | 4   |
| 2850   | Thiazesim                 | Antidepressant                | 5845-26-1  |      | 151     | 326 | 4.27  | 3   |
| 2851   | Thiazinamium Chloride     | Antihistaminic                | 4320-13-2  |      | 267     | 335 |       |     |
| 2852   | Thiazinamium Metilsulfate | Antihistaminic                | 58-34-4    |      | 208     | 411 |       |     |
| 2853   | Thiazolsulfone            | Antibiotic                    | 473-30-3   |      | 220     | 255 | -0.96 | 5   |
| 2854   | Thiethylperazine          | Antiemetic                    | 1420-55-9  |      | 63      | 400 | 5.32  | 3   |
| 2855   | Thiocarbanidin            | Antibiotic                    | 92-97-7    |      | 149     | 378 | 4.56  | 4   |
| 2856   | Thiocolchicoside          | Muscle Relaxant<br>(Skeletal) | 602-41-5   | Y    | 240     | 564 | -1.13 | 11  |
| 2857   | Thioctic Acid             | Hepatic Protectant            | 1077-28-7  |      | 54      | 206 | 2.53  | 2   |
| 2858   | Thioctic Acid Amide       | Unclassified                  | 940-69-2   |      | 127     | 205 | 1.99  | 2   |
| 2859   | Thiofuradene              | Antibacterial                 | 2240-21-3  |      | 225     | 240 | 1.13  | 7   |
| 2860   | Thioinosine               | Immunomodulator               | 574-25-4   |      | 210     | 284 | -1.33 | 8   |
| 2861   | Thiopental                | Anesthetic                    | 76-75-5    |      | 158     | 242 | 3.05  | 4   |
| 2862   | Thiopropazine             | Antipsychotic                 | 316-81-4   |      | 140     | 447 | 4.26  | 6   |
| 2863   | Thioridazine              | Antipsychotic                 | 50-52-2    | Y    | 73      | 371 | 5.90  | 2   |
| 2864   | Thiotepa                  | Antineoplastic                | 52-24-4    |      | 53      | 189 | 0.53  | 3   |
| 2865   | Thiotetrabarbital         | Sedative                      | 467-38-9   |      | 165     | 256 | 3.56  | 4   |
| 2866   | Thiouracil                | Thyroid                       | 141-90-2   |      | 310     | 128 | -0.28 | 3   |
| 2867   | Thiourea                  | Antineoplastic                | 62-56-6    |      | 179     | 76  | -1.02 | 2   |
| 2868   | Thiphenamil               | Muscle Relaxant<br>(Skeletal) | 82-99-5    |      | 36      | 327 | 4.33  | 2   |
| 2869   | Thozalinone               | Antidepressant                | 655-05-0   |      | 136     | 204 | 0.95  | 4   |
| 2870   | Thymol                    | Antibacterial                 | 89-83-8    |      | 52      | 150 | 3.25  | 1   |

| Number | Common Name         | Indication                | CAS Number  | Oral | MP (°C) | MW  | ClogP | HBA |
|--------|---------------------|---------------------------|-------------|------|---------|-----|-------|-----|
| 2871   | Thyroxine           | Thyroid                   | 51-48-9     |      | 233     | 777 | 4.72  | 5   |
| 2872   | Tiacrilast          | Antihistaminic            | 78299-53-3  |      | 273     | 262 | 1.44  | 5   |
| 2873   | Tiadenol            | Antihyperlipidemic        | 6964-20-1   |      | 70      | 295 | 3.63  | 2   |
| 2874   | Tiamenidine         | Antihypertensive          | 31428-61-2  |      | 152     | 216 | 1.87  | 3   |
| 2875   | Tiametonium Iodide  | Cholinergic               | 10433-71-3  |      | 227     | 488 |       |     |
| 2876   | Tiapamil            | Antiarrhythmic            | 57010-31-8  |      | 148     | 556 | 1.13  | 9   |
| 2877   | Tiapride            | Antispasmodic             | 51012-32-9  | Y    | 124     | 328 | 1.22  | 6   |
| 2878   | Tiaramide           | Antiinflammatory          | 32527-55-2  |      | 160     | 356 | 1.18  | 6   |
| 2879   | Tiazofurin          | Antineoplastic            | 60084-10-8  |      | 144     | 260 | -0.78 | 7   |
| 2880   | Tibenzate           | Unclassified              | 13402-51-2  |      | 39      | 228 | 4.48  | 1   |
| 2881   | Tibolone            | Steroid                   | 5630-53-5   | Y    | 164     | 312 | 3.52  | 2   |
| 2882   | Ticlatone           | Antibacterial             | 70-10-0     |      | 271     | 186 | 2.64  | 2   |
| 2883   | Ticlopidine         | Antithrombotic            | 55142-85-3  | Y    | 211     | 264 | 3.23  | 1   |
| 2884   | Ticrynafen          | Diuretic                  | 40180-04-9  |      | 153     | 331 | 3.04  | 4   |
| 2885   | Tidiacic            | Unclassified              | 30097-06-4  |      | 185     | 177 | 1.20  | 5   |
| 2886   | Tiemonium Iodide    | Antispasmodic             | 144-12-7    |      | 190     | 445 |       |     |
| 2887   | Tienoxolol          | Diuretic                  | 90055-97-3  |      | 128     | 421 | 2.90  | 7   |
| 2888   | Tifemoxone          | Antidepressant            | 39754-64-8  |      | 148     | 223 | 2.77  | 3   |
| 2889   | Tifenazoxide        | Antihypertensive          | 279215-43-9 |      | 252     | 292 | 2.09  | 5   |
| 2890   | Tiflamizole         | Antiinflammatory          | 62894-89-7  |      | 240     | 420 | 3.99  | 4   |
| 2891   | Tifurac Sodium      | Analgesic                 | 97483-17-5  |      | 154     | 349 | 3.65  | 4   |
| 2892   | Tigestol            | Progestogen               | 896-71-9    |      | 113     | 284 | 5.46  | 1   |
| 2893   | Tilbroquinol        | Antibiotic                | 7175-09-9   |      | 160     | 238 | 3.41  | 2   |
| 2894   | Tiliquinol          | Antibiotic                | 5541-67-3   |      | 123     | 159 | 2.39  | 2   |
| 2895   | Tilmacoxib          | Antirheumatic             | 180200-68-4 |      | 167     | 338 | 3.21  | 5   |
| 2896   | Tilnoprofen Arbamel | Antiinflammatory          | 118635-52-2 |      | 151     | 354 | 1.24  | 6   |
| 2897   | Tilomisole          | Immunomodulator           | 58433-11-7  |      | 243     | 343 | 4.40  | 4   |
| 2898   | Tilozepine          | Analgesic                 | 42239-60-1  |      | 185     | 332 | 3.63  | 3   |
| 2899   | Tiludronate         | Bone Resorption Inhibitor | 89987-06-4  |      | 176     | 319 | 2.00  | 6   |
| 2900   | Timelotem           | Antipsychotic             | 96306-34-2  |      | 121     | 315 | 0.87  | 3   |
| 2901   | Timepidium Bromide  | Mydriatic                 | 35035-05-3  |      | 198     | 400 |       |     |
| 2902   | Timiperone          | Antipsychotic             | 57648-21-2  |      | 202     | 398 | 4.18  | 4   |
| 2903   | Timirdine           | Antipsychotic             | 100417-09-2 |      | 109     | 228 | 1.68  | 3   |
| 2904   | Timolol             | Antihypertensive          | 26839-75-8  | Y    | 137     | 316 | 1.28  | 7   |
| 2905   | Timonacic           | Hepatic Protectant        | 444-27-9    | Y    | 200     | 133 | -0.50 | 3   |
| 2906   | Timoprazole         | Antiulcerative            | 57237-97-5  |      | 163     | 257 | 1.22  | 4   |
| 2907   | Tinazoline          | Antihypertensive          | 62882-99-9  |      | 120     | 217 | 2.35  | 3   |
| 2908   | Tinidazole          | Antiprotozoal             | 19387-91-8  | Y    | 128     | 247 | -0.29 | 7   |
| 2909   | Tinoridine          | Analgesic                 | 24237-54-5  |      | 98      | 316 | 2.71  | 4   |
| 2910   | Tiocarlide          | Antibacterial             | 910-86-1    |      | 142     | 400 | 5.79  | 4   |
| 2911   | Tiodomarol          | Anticoagulant             | 22619-35-8  |      | 104     | 447 | 5.55  | 4   |
| 2912   | Tiomesterone        | Androgen                  | 2205-73-4   |      | 206     | 450 | 3.98  | 4   |

| Number | Common Name         | Indication       | CAS Number  | Oral | MP (°C) | MW  | ClogP | HBA |
|--------|---------------------|------------------|-------------|------|---------|-----|-------|-----|
| 2913   | Tiopronin           | Antidote         | 1953-02-2   |      | 96      | 163 | -0.67 | 4   |
| 2914   | Tioxamast           | Antihistaminic   | 74531-88-7  |      | 168     | 306 | 2.88  | 6   |
| 2915   | Tioxidazole         | Anthelmithic     | 61570-90-9  |      | 197     | 266 | 3.09  | 5   |
| 2916   | Tioxolone           | Dermatologic     | 4991-65-5   |      | 160     | 168 | 2.07  | 3   |
| 2917   | Tipepidine          | Antitussive      | 5169-78-8   |      | 64      | 275 | 3.02  | 1   |
| 2918   | Tipifamib           | Antineoplastic   | 192185-72-1 | Y    | 234     | 488 | 4.01  | 5   |
| 2919   | Tiplasinin          | Anticoagulant    | 393105-53-8 |      | 164     | 439 | 6.25  | 5   |
| 2920   | Tipranavir          | Antiviral        | 174484-41-4 | Y    | 86      | 602 | 6.92  | 7   |
| 2921   | Tiprenolol          | Antihypertensive | 26481-51-6  |      | 88      | 255 | 1.91  | 3   |
| 2922   | Tiprotimod          | Immunomodulator  | 105523-37-3 |      | 121     | 275 | 1.01  | 5   |
| 2923   | Tiquinamide         | Mydriatic        | 53400-67-2  |      | 150     | 206 | 1.68  | 2   |
| 2924   | Tiquizium Bromide   | Antispasmodic    | 71731-58-3  |      | 278     | 409 |       |     |
| 2925   | Tiracizine          | Antidepressant   | 83275-56-3  |      | 127     | 367 | 2.23  | 6   |
| 2926   | Tirapazamine        | Antineoplastic   | 27314-97-2  |      | 220     | 178 | -0.29 | 6   |
| 2927   | Tiratricol          | Thyroid          | 51-24-1     |      | 182     | 622 | 4.88  | 4   |
| 2928   | Tirofiban           | Antithrombotic   | 144494-65-5 |      | 223     | 440 | 2.61  | 7   |
| 2929   | Tiropamide          | Antispasmodic    | 55837-29-1  |      | 65      | 467 | 4.14  | 6   |
| 2930   | Tisocromide         | Antipsychotic    | 35423-51-9  |      | 160     | 414 | 1.30  | 8   |
| 2931   | Tisopurine          | Antineoplastic   | 5334-23-6   |      | 352     | 152 | -0.20 | 4   |
| 2932   | Tixocortol Pivalate | Antiinflammatory | 55560-96-8  |      | 195     | 462 | 4.13  | 5   |
| 2933   | Tizanidine          | Antispasmodic    | 51322-75-9  | Y    | 221     | 254 | 2.39  | 5   |
| 2934   | Tobramycin          | Antibiotic       | 32986-56-4  |      | 164     | 467 | -4.22 | 14  |
| 2935   | Tocainide           | Antiarrhythmic   | 41708-72-9  |      | 246     | 192 | 0.81  | 3   |
| 2936   | Tofamilast          | Bronchodilator   | 185954-27-2 |      | 125     | 339 | 4.22  | 5   |
| 2937   | Tofisopam           | Anxiolytic       | 22345-47-7  |      | 149     | 382 | 3.64  | 6   |
| 2938   | Tolazamide          | Antidiabetic     | 1156-19-0   |      | 168     | 311 | 1.54  | 6   |
| 2939   | Tolazoline          | Vasodilator      | 59-98-3     |      | 66      | 160 | 1.80  | 2   |
| 2940   | Tolboxane           | Antianginal      | 2430-46-8   |      | 54      | 232 |       | 2   |
| 2941   | Tolbutamide         | Antidiabetic     | 64-77-7     |      | 128     | 270 | 2.36  | 5   |
| 2942   | Tolcapone           | Antiparkinsonian | 134308-13-7 | Y    | 141     | 273 | 3.02  | 6   |
| 2943   | Tolciclate          | Antifungal       | 50838-36-3  |      | 93      | 323 | 5.52  | 2   |
| 2944   | Tofenamic Acid      | Antiinflammatory | 13710-19-5  |      | 207     | 261 | 5.47  | 3   |
| 2945   | Tolimidone          | Antiulcerative   | 41964-07-2  |      | 163     | 202 | 0.70  | 4   |
| 2946   | Tolindate           | Antifungal       | 27877-51-6  |      | 95      | 297 | 5.08  | 2   |
| 2947   | Toliprolol          | Antianginal      | 2933-94-0   |      | 76      | 223 | 1.80  | 3   |
| 2948   | Tolmetin            | Antiinflammatory | 26171-23-3  |      | 155     | 257 | 2.68  | 4   |
| 2949   | Tolnaftate          | Antifungal       | 2398-96-1   |      | 111     | 307 | 5.14  | 2   |
| 2950   | Tolnidamine         | Antihistaminic   | 50454-68-7  |      | 220     | 301 | 4.52  | 4   |
| 2951   | Tolonidine          | Antihypertensive | 4201-22-3   |      | 148     | 209 | 2.57  | 3   |
| 2952   | Toloxatone          | Antidepressant   | 29218-27-7  |      | 76      | 207 | 1.53  | 4   |
| 2953   | Tolpadol            | Analgesic        | 77502-27-3  |      | 339     | 450 | 2.42  | 6   |
| 2954   | Tolpentamide        | Antispasmodic    | 1027-87-8   |      | 169     | 282 | 2.28  | 5   |



| Number | Common Name                 | Indication                    | CAS Number  | Oral | MP (°C) | MW  | ClogP | HBA |
|--------|-----------------------------|-------------------------------|-------------|------|---------|-----|-------|-----|
| 2955   | Tolperisone                 | Muscle Relaxant<br>(Skeletal) | 728-88-1    | Y    | 176     | 245 | 3.01  | 2   |
| 2956   | Tolpyrramide                | Antidiabetic                  | 5588-38-5   |      | 212     | 268 | 1.05  | 5   |
| 2957   | Tolrestat                   | Antidiabetic                  | 82964-04-3  |      | 164     | 357 | 3.59  | 4   |
| 2958   | Tolvaptan                   | Cardiotonic                   | 150683-30-0 | Y    | 220     | 448 | 4.12  | 5   |
| 2959   | Tomelukast                  | Bronchodilator                | 88107-10-2  |      | 114     | 318 | 3.74  | 7   |
| 2960   | Topilutamide                | Sedative                      | 260980-89-0 |      | 145     | 403 | 3.39  | 8   |
| 2961   | Topiramate                  | Anticonvulsant                | 97240-79-4  | Y    | 125     | 339 | 2.16  | 9   |
| 2962   | Topterone                   | Steroid                       | 60607-35-4  |      | 115     | 330 | 4.58  | 2   |
| 2963   | Torcetrapib                 | Antihyperlipidemic            | 262352-17-0 |      | 54      | 600 | 6.64  | 6   |
| 2964   | Toremifene                  | Antineoplastic                | 89778-26-7  | Y    | 109     | 405 | 4.77  | 2   |
| 2965   | Torse mide                  | Diuretic                      | 56211-40-6  |      | 163     | 348 | 1.96  | 7   |
| 2966   | Tracazolate                 | Sedative                      | 41094-88-6  |      | 74      | 304 | 6.78  | 6   |
| 2967   | Tradecamide                 | Unclassified                  | 132787-19-0 |      | 68      | 257 | 3.44  | 3   |
| 2968   | Tralonide                   | Glucocorticoid                | 21365-49-1  |      | 245     | 488 | 3.72  | 4   |
| 2969   | Tramazoline                 | Decongestant                  | 1082-57-1   |      | 143     | 215 | 2.78  | 3   |
| 2970   | Tramiprosate                | Nootropic                     | 3687-18-1   |      | 292     | 139 | -2.47 | 4   |
| 2971   | Tranexamic Acid             | Hemostatic                    | 1197-18-8   |      | 386     | 157 | 0.50  | 3   |
| 2972   | Tranilast                   | Antihistaminic                | 53902-12-8  |      | 212     | 327 | 3.17  | 6   |
| 2973   | Trantelium Bromide          | Antispasmodic                 | 4047-34-1   |      | 276     | 444 |       |     |
| 2974   | Tranlycypromine             | Antidepressant                | 155-09-9    |      | 28      | 133 | 1.47  | 1   |
| 2975   | Trapidil                    | Vasodilator                   | 15421-84-8  |      | 100     | 205 | 2.31  | 5   |
| 2976   | Trazium Esilate             | Antidepressant                | 97110-59-3  |      | 188     | 420 |       |     |
| 2977   | Trazodone                   | Antidepressant                | 19794-93-5  | Y    | 87      | 372 | 2.76  | 6   |
| 2978   | Trefentanil                 | Analgesic                     | 120656-74-8 |      | 200     | 466 | 3.32  | 8   |
| 2979   | Trenbolone Acetate          | Steroid                       | 10161-34-9  |      | 96      | 312 | 4.02  | 3   |
| 2980   | Trengestone                 | Progestogen                   | 5192-84-7   |      | 208     | 344 | 3.38  | 2   |
| 2981   | Treosulfan                  | Antineoplastic                | 299-75-2    | Y    | 76      | 278 | -0.77 | 8   |
| 2982   | Trepibutone                 | Choleretic                    | 41826-92-0  |      | 151     | 310 | 2.96  | 6   |
| 2983   | Trepipam Maleate            | Sedative                      | 56030-50-3  |      | 106     | 297 | 3.24  | 3   |
| 2984   | Treprostinil                | Antihypertensive              | 81846-19-7  | Y    | 126     | 391 | 3.45  | 5   |
| 2985   | Trequinsin                  | Antihypertensive              | 79855-88-2  |      | 152     | 405 | 4.12  | 6   |
| 2986   | Trestolone Acetate          | Androgen                      | 6157-87-5   |      | 111     | 330 | 4.40  | 3   |
| 2987   | Tretinoin                   | Antineoplastic                | 302-79-4    | Y    | 181     | 300 | 6.26  | 2   |
| 2988   | Triafungin                  | Antifungal                    | 55242-77-8  |      | 167     | 222 | 1.37  | 4   |
| 2989   | Triamcinolone               | Glucocorticoid                | 124-94-7    |      | 266     | 394 | 0.53  | 6   |
| 2990   | Triamcinolone Acetonide     | Glucocorticoid                | 76-25-5     |      | 273     | 434 | 2.43  | 6   |
| 2991   | Triamcinolone Benetonide    | Glucocorticoid                | 31002-79-6  |      | 205     | 623 | 4.02  | 9   |
| 2992   | Triamcinolone Diacetate     | Glucocorticoid                | 67-78-7     |      | 235     | 478 | 2.00  | 8   |
| 2993   | Triamcinolone<br>Hexacetone | Antiinflammatory              | 5611-51-8   |      | 295     | 532 | 4.49  | 7   |
| 2994   | Triamterene                 | Diuretic                      | 396-01-0    |      | 316     | 253 | 1.16  | 7   |
| 2995   | Triaziquone                 | Antineoplastic                | 68-76-8     |      | 162     | 231 | -0.33 | 5   |

| Number | Common Name                    | Indication         | CAS Number | Oral | MP (°C) | MW  | ClogP | HBA |
|--------|--------------------------------|--------------------|------------|------|---------|-----|-------|-----|
| 2996   | Triazolam                      | Sedative           | 28911-01-5 | Y    | 234     | 343 | 2.08  | 4   |
| 2997   | Tribromoethanol                | Anesthetic         | 75-80-9    |      | 81      | 283 | 2.02  | 1   |
| 2998   | Tribromsalan                   | Antibacterial      | 87-10-5    |      | 227     | 450 | 6.17  | 3   |
| 2999   | Tribuzone                      | Antiinflammatory   | 13221-27-7 |      | 139     | 364 | 2.52  | 5   |
| 3000   | Tricetamide                    | Sedative           | 363-20-2   |      | 133     | 324 | 1.26  | 7   |
| 3001   | Trichlormethiazide             | Diuretic           | 133-67-5   |      | 79      | 381 | 0.13  | 7   |
| 3002   | Triciribine                    | Antineoplastic     | 35943-35-2 |      | 207     | 320 | -2.15 | 10  |
| 3003   | Triclabendazole                | Anthelmintic       | 68786-66-3 |      | 132     | 360 | 5.39  | 3   |
| 3004   | Triclacetamol                  | Analgesic          | 6340-87-0  |      | 134     | 255 | 2.73  | 3   |
| 3005   | Triclazate                     | Anorexic           | 7009-76-9  |      | 132     | 325 | 2.41  | 4   |
| 3006   | Triclodazol                    | Antiprotozoal      | 56-28-0    |      | 138     | 386 | 10.15 | 4   |
| 3007   | Tricyclamol Chloride           | Antiparkinsonian   | 3818-88-0  |      | 227     | 338 |       |     |
| 3008   | Tridihexethyl Iodide           | Mydriatic          | 125-99-5   |      | 182     | 445 |       |     |
| 3009   | Tridolgosir                    | Antineoplastic     | 72741-87-8 |      | 140     | 173 | 0.08  | 4   |
| 3010   | Triethylamine                  | Antiinflammatory   | 121-44-8   |      | 50      | 101 | 1.65  | 1   |
| 3011   | Triethylenemelamine            | Antineoplastic     | 51-18-3    |      | 150     | 204 | 0.52  | 6   |
| 3012   | Triflumidate                   | Antiinflammatory   | 24243-89-8 |      | 132     | 401 | 3.50  | 6   |
| 3013   | Trifluoperazine                | Antipsychotic      | 117-89-5   |      | 25      | 407 | 4.62  | 3   |
| 3014   | Triflupromazine                | Antipsychotic      | 146-54-3   |      | 316     | 352 | 5.16  | 2   |
| 3015   | Trifluridine                   | Antiviral          | 70-00-8    |      | 181     | 296 | -0.02 | 7   |
| 3016   | Triflusal                      | Antithrombotic     | 322-79-2   |      | 121     | 248 | 3.16  | 4   |
| 3017   | Trihexyphenidyl                | Antiparkinsonian   | 144-11-6   |      | 116     | 301 | 4.39  | 2   |
| 3018   | Trilostane                     | Pituitary          | 13647-35-3 |      | 264     | 329 | 3.10  | 4   |
| 3019   | Trimazosin                     | Antihypertensive   | 35795-16-5 |      | 158     | 435 | 1.13  | 11  |
| 3020   | Trimebutine                    | Antispasmodic      | 39133-31-8 |      | 79      | 387 | 4.84  | 6   |
| 3021   | Trimecaine                     | Anesthetic         | 616-68-2   |      | 46      | 248 | 2.70  | 3   |
| 3022   | Trimedoxime Bromide            | Antidote           | 56-97-3    |      | 222     | 444 |       |     |
| 3023   | Trimeperidine                  | Analgesic          | 64-39-1    |      | 182     | 275 | 3.03  | 3   |
| 3024   | Trimethadione                  | Anticonvulsant     | 127-48-0   |      | 46      | 143 | 0.79  | 4   |
| 3025   | Trimethaphan Camsylate         | Antihypertensive   | 68-91-7    |      | 245     | 597 |       |     |
| 3026   | Trimethidinium<br>Methosulfate | Antihypertensive   | 14149-43-0 |      | 193     | 497 |       |     |
| 3027   | Trimethobenzamide              | Antiemetic         | 138-56-7   |      | 189     | 388 | 1.26  | 7   |
| 3028   | Trimethoprim                   | Antibacterial      | 738-70-5   | Y    | 197     | 290 | 0.59  | 7   |
| 3029   | Trimetozine                    | Anxiolytic         | 635-41-6   |      | 126     | 281 | -0.02 | 6   |
| 3030   | Trimetrexate                   | Antineoplastic     | 52128-35-5 |      | 215     | 369 | 1.76  | 8   |
| 3031   | Trimetrexate Glucuronate       | Antineoplastic     | 6556-12-3  |      | 165     | 194 | -2.12 | 7   |
| 3032   | Trimipramine                   | Antidepressant     | 739-71-9   |      | 45      | 294 | 4.71  | 2   |
| 3033   | Trioxsalen                     | Dermatologic       | 3902-71-4  |      | 235     | 228 | 3.67  | 3   |
| 3034   | Tripamol                       | Antihyperlipidemic | 78-41-1    |      | 103     | 437 | 5.93  | 3   |
| 3035   | Tripelennamine                 | Antihistaminic     | 91-81-6    |      | 182     | 255 | 2.78  | 3   |
| 3036   | Tripolidine                    | Antihistaminic     | 486-12-4   |      | 60      | 278 | 3.25  | 2   |
| 3037   | Tritiozine                     | Antiulcerative     | 35619-65-9 |      | 142     | 297 | 1.45  | 5   |

| Number | Common Name          | Indication                   | CAS Number  | Oral | MP (°C) | MW  | ClogP | HBA |
|--------|----------------------|------------------------------|-------------|------|---------|-----|-------|-----|
| 3038   | Tritoqualine         | Antihistaminic               | 14504-73-5  |      | 183     | 501 | 4.76  | 10  |
| 3039   | Troglitazone         | Antidiabetic                 | 97322-87-7  |      | 180     | 441 | 4.69  | 6   |
| 3040   | Troleandomycin       | Antibiotic                   | 2751-09-9   |      | 170     | 814 | 3.46  | 16  |
| 3041   | Tromethamine         | Oxytocic                     | 77-86-1     |      | 169     | 121 | -2.52 | 5   |
| 3042   | Tropicamide          | Mydriatic                    | 1508-75-4   |      | 97      | 284 | 0.64  | 4   |
| 3043   | Tropigline           | Unclassified                 | 533-08-4    |      | 182     | 223 | 2.69  | 3   |
| 3044   | Tropisetron          | Antiemetic                   | 89565-68-4  | Y    | 201     | 284 | 3.03  | 4   |
| 3045   | Troquidazole         | Antiprotozoal                | 108001-60-1 |      | 228     | 301 | 0.82  | 8   |
| 3046   | Troxerutin           | Capillary Protectant         | 7085-55-4   |      | 181     | 743 | -1.90 | 19  |
| 3047   | Troxipide            | Antiulcerative               | 30751-05-4  |      | 179     | 294 | 1.71  | 6   |
| 3048   | Tuaminoheptane       | Decongestant                 | 123-82-0    |      | 101     | 115 | 2.43  | 1   |
| 3049   | Tuclazepam           | Anxiolytic                   | 51037-88-8  |      | 173     | 334 | 3.26  | 3   |
| 3050   | Tulobuterol          | Bronchodilator               | 41570-61-0  |      | 89      | 227 | 2.62  | 2   |
| 3051   | Tybamate             | Anxiolytic                   | 4268-36-4   |      | 50      | 274 | 2.76  | 6   |
| 3052   | Tylosin              | Antibiotic                   | 1401-69-0   |      | 128     | 916 | 0.63  | 18  |
| 3053   | Ubenimex             | Immunomodulator              | 58970-76-6  |      | 233     | 308 | 1.00  | 6   |
| 3054   | Ubidecarenone        | Antihypertensive             | 303-98-0    |      | 47      | 863 | 19.12 | 4   |
| 3055   | Ubisindine           | Unclassified                 | 26070-78-0  |      | 63      | 308 | 4.16  | 3   |
| 3056   | Ulfloxacin           | Antibiotic                   | 112984-60-8 |      | 215     | 349 | 2.53  | 6   |
| 3057   | Upenazime            | Antihypertensive             | 95268-62-5  |      | 196     | 286 | 1.68  | 6   |
| 3058   | Uracil               | Antineoplastic               | 66-22-8     | Y    | 320     | 112 | -1.04 | 4   |
| 3059   | Uracil Mustard       | Antineoplastic               | 66-75-1     |      | 206     | 252 | 1.00  | 5   |
| 3060   | Urapidil             | Antihypertensive             | 34661-75-1  |      | 157     | 387 | 1.64  | 8   |
| 3061   | Urea                 | Diuretic                     | 57-13-6     |      | 132     | 60  | -1.66 | 3   |
| 3062   | Uredepa              | Antineoplastic               | 302-49-8    |      | 89      | 219 | -2.06 | 6   |
| 3063   | Uredofos             | Anthelmintic                 | 52406-01-6  |      | 164     | 501 | 2.98  | 10  |
| 3064   | Urefibrate           | Bone Resorption<br>Inhibitor | 38647-79-9  |      | 133     | 355 | 4.03  | 6   |
| 3065   | Urethane             | Antineoplastic               | 51-79-6     |      | 48      | 89  | -0.19 | 3   |
| 3066   | Ursodiol             | Anticholelithogenic          | 128-13-2    | Y    | 196     | 392 | 4.76  | 4   |
| 3067   | Utibapril            | Antihypertensive             | 109683-61-6 |      | 165     | 449 | 5.69  | 8   |
| 3068   | Valdecoxib           | Antiinflammatory             | 181695-72-7 | Y    | 160     | 314 | 3.57  | 5   |
| 3069   | Valdetamide          | Sedative                     | 512-48-1    |      | 80      | 155 | 2.15  | 2   |
| 3070   | Valdipromide         | Analgesic                    | 52061-73-1  |      | 69      | 185 | 3.47  | 2   |
| 3071   | Valethamate Bromide  | Antispasmodic                | 90-22-2     |      | 102     | 385 |       |     |
| 3072   | Valnoctamide         | Anxiolytic                   | 4171-13-5   |      | 114     | 143 | 1.89  | 2   |
| 3073   | Valofane             | Sedative                     | 3258-51-3   |      | 136     | 226 | -0.24 | 6   |
| 3074   | Valproic Acid        | Anticonvulsant               | 99-66-1     |      | 25      | 144 | 2.58  | 2   |
| 3075   | Valpromide           | Anticonvulsant               | 2430-27-5   |      | 125     | 143 | 2.04  | 2   |
| 3076   | Valsartan            | Antihypertensive             | 137862-53-4 | Y    | 114     | 435 | 4.02  | 8   |
| 3077   | Vamicamide           | Mydriatic                    | 132373-81-0 |      | 145     | 297 | 0.96  | 4   |
| 3078   | Vandetanib           | Ophthalmic                   | 443913-73-3 | Y    | 242     | 474 | 4.00  | 6   |
| 3079   | Varenicline Tartrate | Antidepressant               | 249296-44-4 |      | 138     | 211 | 1.01  | 3   |

| Number | Common Name          | Indication                      | CAS Number  | Oral | MP (°C) | MW  | ClogP | HBA |
|--------|----------------------|---------------------------------|-------------|------|---------|-----|-------|-----|
| 3080   | Varespladib Sodium   | Antihypertensive                | 172732-68-2 |      | 231     | 380 | 2.68  | 7   |
| 3081   | Vatalanib            | Antineoplastic                  | 212141-54-3 |      | 211     | 347 | 3.15  | 4   |
| 3082   | Vecuronium Bromide   | Neuromuscular<br>Blocking Agent | 50700-72-6  |      | 228     | 636 |       |     |
| 3083   | Velnacrine           | Nootropic                       | 124027-47-0 |      | 245     | 214 | 0.76  | 3   |
| 3084   | Venlafaxine          | Antidepressant                  | 93413-69-5  | Y    | 74      | 277 | 2.48  | 3   |
| 3085   | Veradoline           | Analgesic                       | 82924-71-8  |      | 103     | 326 | 1.83  | 4   |
| 3086   | Verapamil            | Antihypertensive                | 52-53-9     | Y    | 25      | 454 | 4.02  | 6   |
| 3087   | Verazide             | Antibacterial                   | 93-47-0     |      | 189     | 285 | 1.15  | 6   |
| 3088   | Vesnarinone          | Cardiotonic                     | 81840-15-5  |      | 238     | 395 | 0.97  | 7   |
| 3089   | Vidarabine           | Antiviral                       | 5536-17-4   |      | 257     | 267 | 0.76  | 9   |
| 3090   | Vigabatrin           | Anticonvulsant                  | 68506-86-5  | Y    | 209     | 129 | -0.30 | 3   |
| 3091   | Vilazodone           | Antidepressant                  | 163521-12-8 | Y    | 277     | 442 | 2.59  | 7   |
| 3092   | Vildagliptin         | Antidiabetic                    | 274901-16-5 | Y    | 148     | 303 | 0.17  | 5   |
| 3093   | Viloxazine           | Antidepressant                  | 46817-91-8  |      | 178     | 237 | 1.24  | 4   |
| 3094   | Vinbarbital          | Sedative                        | 125-42-8    |      | 160     | 224 | 1.24  | 5   |
| 3095   | Vinblastine          | Antineoplastic                  | 865-21-4    |      | 201     | 810 | 5.92  | 13  |
| 3096   | Vinburnine           | Vasodilator                     | 4880-88-0   |      | 173     | 294 | 2.66  | 3   |
| 3097   | Vincamine            | Antineoplastic                  | 1617-90-9   |      | 232     | 354 | 2.94  | 5   |
| 3098   | Vincanol             | Anesthetic                      | 19877-89-5  |      | 108     | 296 | 2.91  | 3   |
| 3099   | Vincantril           | Unclassified                    | 65285-58-7  |      | 172     | 260 | 2.59  | 3   |
| 3100   | Vinconate            | Nootropic                       | 70704-03-9  |      | 118     | 296 | 2.50  | 4   |
| 3101   | Vincristine          | Antineoplastic                  | 57-22-7     |      | 219     | 825 | 5.75  | 14  |
| 3102   | Vindesine            | Antineoplastic                  | 53643-48-4  |      | 231     | 753 | 4.94  | 12  |
| 3103   | Vinleurosine Sulfate | Antineoplastic                  | 23360-92-1  |      | 204     | 809 | 5.71  | 13  |
| 3104   | Vinpocetine          | Vasodilator                     | 42971-09-5  |      | 148     | 350 | 3.98  | 4   |
| 3105   | Vinrosidine Sulfate  | Antineoplastic                  | 15228-71-4  |      | 210     | 811 | 5.92  | 13  |
| 3106   | Vinylbital           | Sedative                        | 2430-49-1   |      | 90      | 224 | 1.18  | 5   |
| 3107   | Viomycin             | Antibiotic                      | 32988-50-4  |      | 280     | 685 | -4.33 | 23  |
| 3108   | Viquidil             | Vasodilator                     | 84-55-9     |      | 60      | 324 | 3.48  | 4   |
| 3109   | Visnadine            | Vasodilator                     | 477-32-7    |      | 84      | 388 | 4.66  | 7   |
| 3110   | Vorinostat           | Antineoplastic                  | 149647-78-9 | Y    | 160     | 264 | 2.34  | 5   |
| 3111   | Warfarin             | Anticoagulant                   | 81-81-2     |      | 161     | 308 | 3.13  | 4   |
| 3112   | Xenalipin            | Antihyperlipidemic              | 84392-17-6  |      | 170     | 266 | 2.83  | 2   |
| 3113   | Xenazoic Acid        | Antiviral                       | 1174-11-4   |      | 192     | 375 | 4.65  | 5   |
| 3114   | Xenbucin             | Antihyperlipidemic              | 959-10-4    |      | 125     | 240 | 4.12  | 2   |
| 3115   | Xenyhexenic Acid     | Unclassified                    | 95040-85-0  | Y    | 119     | 266 | 4.49  | 2   |
| 3116   | Xibenolol            | Antiarrhythmic                  | 30187-90-7  |      | 57      | 251 | 2.83  | 3   |
| 3117   | Xibornol             | Antibacterial                   | 13741-18-9  |      | 95      | 258 | 6.15  | 1   |
| 3118   | Xilobam              | Muscle Relaxant<br>(Skeletal)   | 50528-97-7  |      | 119     | 245 | 1.48  | 4   |
| 3119   | Ximoprofen           | Antiinflammatory                | 56187-89-4  |      | 178     | 261 | 2.10  | 4   |
| 3120   | Xinidamine           | Analgesic                       | 50264-78-3  |      | 170     | 280 | 4.46  | 4   |

| Number | Common Name        | Indication                   | CAS Number  | Oral | MP (°C) | MW  | ClogP | HBA |
|--------|--------------------|------------------------------|-------------|------|---------|-----|-------|-----|
| 3121   | Xipamide           | Diuretic                     | 14293-44-8  |      | 256     | 355 | 2.19  | 6   |
| 3122   | Xylazine           | Sedative                     | 7361-61-7   |      | 140     | 220 | 2.71  | 2   |
| 3123   | Xylocoumarol       | Anticoagulant                | 15301-97-0  |      | 216     | 266 | 4.49  | 3   |
| 3124   | Xylometazoline     | Decongestant                 | 526-36-3    |      | 131     | 244 | 4.59  | 2   |
| 3125   | Yohimbic Acid      | Erectile Dysfunction         | 522-87-2    |      | 280     | 340 | 2.25  | 5   |
| 3126   | Yohimbine          | Erectile Dysfunction         | 146-48-5    |      | 234     | 354 | 2.87  | 5   |
| 3127   | Zafirlukast        | Bronchodilator               | 107753-78-6 | Y    | 142     | 575 | 5.04  | 9   |
| 3128   | Zafuleptine        | Antidepressant               | 59209-97-1  |      | 85      | 295 | 3.75  | 3   |
| 3129   | Zalcitabine        | Antiviral                    | 7481-89-2   | Y    | 216     | 211 | -1.36 | 6   |
| 3130   | Zaldaride          | Antidiarrheal                | 109826-26-8 |      | 174     | 429 | 3.93  | 6   |
| 3131   | Zaleplon           | Sedative                     | 151319-34-5 | Y    | 184     | 305 | 1.40  | 6   |
| 3132   | Zaltoprofen        | Antiinflammatory             | 74711-43-6  |      | 132     | 298 | 4.25  | 3   |
| 3133   | Zanamivir          | Antiviral                    | 139110-80-8 |      | 253     | 332 | -1.87 | 11  |
| 3134   | Zanoterone         | Steroid                      | 107000-34-0 |      | 200     | 416 | 3.97  | 5   |
| 3135   | Zaprinast          | Antihistaminic               | 37762-06-4  |      | 241     | 271 | 2.10  | 7   |
| 3136   | Zeranol            | Steroid                      | 26538-44-3  |      | 180     | 322 | 4.65  | 5   |
| 3137   | Zetidoline         | Antipsychotic                | 51940-78-4  |      | 84      | 307 | 2.85  | 4   |
| 3138   | Zidapamide         | Antihypertensive             | 75820-08-5  |      | 213     | 365 | 1.56  | 6   |
| 3139   | Zidovudine         | Antiviral                    | 30516-87-1  |      | 124     | 267 |       |     |
| 3140   | Zileuton           | Antiinflammatory             | 111406-87-2 |      | 157     | 236 | 2.70  | 4   |
| 3141   | Zilpaterol         | Bronchodilator               | 119520-05-7 |      | 177     | 261 | 1.26  | 5   |
| 3142   | Zimeldine          | Antidepressant               | 56775-88-3  |      | 196     | 317 | 3.07  | 2   |
| 3143   | Zindoxifene        | Antineoplastic               | 86111-26-4  |      | 146     | 351 | 3.81  | 5   |
| 3144   | Zinviroxime        | Antiviral                    | 72301-78-1  |      | 183     | 358 | 3.10  | 7   |
| 3145   | Zipeprol           | Antitussive                  | 34758-83-3  |      | 83      | 384 | 2.33  | 5   |
| 3146   | Ziprasidone        | Antipsychotic                | 146939-27-7 | Y    | 304     | 413 | 2.97  | 5   |
| 3147   | Zofenopril Calcium | Antihypertensive             | 81872-10-8  | Y    | 45      | 430 | 5.62  | 5   |
| 3148   | Zolazepam          | Sedative                     | 31352-82-6  |      | 183     | 286 | 1.98  | 5   |
| 3149   | Zoledronic Acid    | Bone Resorption<br>Inhibitor | 118072-93-8 |      | 239     | 272 | 0.62  | 9   |
| 3150   | Zolertine          | Vasodilator                  | 4004-94-8   |      | 200     | 258 | 0.80  | 6   |
| 3151   | Zolimidine         | Antiulcerative               | 1222-57-7   |      | 243     | 272 | 2.29  | 4   |
| 3152   | Zoloperone         | Antipsychotic                | 52867-74-0  |      | 155     | 397 | 2.39  | 6   |
| 3153   | Zolpidem           | Sedative                     | 82626-48-0  | Y    | 196     | 307 | 3.09  | 4   |
| 3154   | Zomepirac          | Analgesic                    | 33369-31-2  |      | 178     | 291 | 3.36  | 4   |
| 3155   | Zonisamide         | Anticonvulsant               | 68291-97-4  |      | 160     | 212 | 0.72  | 5   |
| 3156   | Zopiclone          | Sedative                     | 43200-80-2  |      | 178     | 388 | 2.71  | 9   |
| 3157   | Zopolrestat        | Antidiabetic                 | 110703-94-1 |      | 197     | 419 | 2.44  | 6   |
| 3158   | Zotepine           | Antipsychotic                | 26615-21-4  |      | 91      | 332 | 5.43  | 2   |
| 3159   | Zoxazolamine       | Uricosuric                   | 61-80-3     |      | 184     | 169 | 2.47  | 3   |
| 3160   | Zucapsaicin        | Analgesic                    | 25775-90-0  |      | 70      | 305 | 3.22  | 4   |
| 3161   | Zuclomiphene       | Pituitary                    | 15690-55-8  |      | 50      | 406 | 5.85  | 2   |
| 3162   | Cetyl Myristate    | Dermatologic                 | 2599-01-1   |      | 47      | 453 | 14.03 | 2   |

| Number | Common Name            | Indication      | CAS Number | Oral | MP (°C) | MW  | ClogP | HBA |
|--------|------------------------|-----------------|------------|------|---------|-----|-------|-----|
| 3163   | Metaraminol            | Antihypotensive | 54-49-9    |      | 108     | 167 | -0.25 | 3   |
| 3164   | Triclofenol Piperazine | Anthelmintic    | 95-95-4    |      | 65      | 197 | 3.84  |     |

"Y" represented the drug was administered orally.

## Discontinued Drugs

| Number | Common Name        | Indications                                                                                                                                                                                                              | CAS Number  | Oral | MP (°C) |
|--------|--------------------|--------------------------------------------------------------------------------------------------------------------------------------------------------------------------------------------------------------------------|-------------|------|---------|
| 1      | (-)-phenserine     | Alzheimers disease; Neurotoxicity drug-induced; Beta amyloid synthesis inhibitor; Nootropic agent                                                                                                                        | 101246-66-6 |      | 152     |
| 2      | (R)-Bicalutamide   | Prostate tumor; Anticancer                                                                                                                                                                                               | 113299-40-4 |      | 180     |
| 3      | 2-methoxyestradiol | Breast tumor; Cancer; Carcinoid tumor; Glioblastoma; Ovary tumor; Prostate tumor; Renal cell carcinoma; Angiogenesis inhibitor; Anticancer; Anticancer protein kinase inhibitor; Apoptosis stimulator; Estradiol agonist | 362-07-2    |      | 184     |
| 4      | 5-methoxypsoralen  | Psoriasis; Vitiligo; Systemic antipsoriatic product; Unspecified drug target                                                                                                                                             | 484-20-8    |      | 188     |
| 5      | A-803467           | Central nervous system disease; Pain; Urinary dysfunction; Analgesic                                                                                                                                                     | 944261-79-4 | Y    | 139     |
| 6      | abecarnil          | Anxiety disorder; Cognitive disorder; Psychotic disorder; Antipsychotic; Anxiolytic                                                                                                                                      | 111841-85-1 |      | 150     |
| 7      | ablukast           | Asthma; Inflammatory bowel disease; Anti-inflammatory; Leukotriene D4 antagonist                                                                                                                                         | 96566-25-5  |      | 114     |
| 8      | AC-5216            | Anxiety disorder; Anxiolytic                                                                                                                                                                                             | 226954-04-7 | Y    | 166     |
| 9      | ACA                | HIV infection; SARS coronavirus infection; Antiviral; Immunostimulant; Unspecified drug target                                                                                                                           | 311342-65-1 |      | 106     |
| 10     | acetylcysteine     | Mucositis; Antioxidant agent                                                                                                                                                                                             | 616-91-1    |      | 109     |
| 11     | aciclovir          | Herpes simplex virus infection; Varicella zoster virus infection; Viral replication inhibitor                                                                                                                            | 59277-89-3  |      | 254     |
| 12     | Adenogestic        | Pain; Analgesic; Anti-inflammatory                                                                                                                                                                                       | 58-61-7     |      | 234     |
| 13     | adinazolam         | Anxiety disorder; Depression; Phobia; Antidepressant; Anxiolytic                                                                                                                                                         | 37115-32-5  |      | 170     |
| 14     | AG-041R            | Ulcer; Gastric secretion inhibitor                                                                                                                                                                                       | 159883-95-1 |      | 101     |
| 15     | agomelatine        | Depression; Antidepressant                                                                                                                                                                                               | 138112-76-2 |      | 110     |
| 16     | albuterol          | Asthma; Bronchodilator                                                                                                                                                                                                   | 18559-94-9  |      | 151     |
| 17     | aleplasinin        | Alzheimers disease; Fibrinolysis stimulator; Neuroprotectant; Nootropic agent; Unspecified drug target                                                                                                                   | 481629-87-2 | Y    | 129     |
| 18     | alfadolone         | Pain; Analgesic                                                                                                                                                                                                          | 14107-37-0  |      | 183     |
| 19     | alinidine          | Heart arrhythmia; Class III antiarrhythmic agent                                                                                                                                                                         | 33178-86-8  |      | 129     |
| 20     | alovudine          | HIV infection; Non-nucleoside reverse transcriptase inhibitor                                                                                                                                                            | 25526-93-6  |      | 178     |
| 21     | alprazolam         | Panic disorder; Anxiolytic; GABA modulator; Hypnotic                                                                                                                                                                     | 28981-97-7  |      | 228     |
| 22     | alprostadiil       | Erectile dysfunction; PGE1 agonist; Vasodilator                                                                                                                                                                          | 745-65-3    |      | 115     |
| 23     | AM-103             | Asthma; Inflammatory disease; Anti-inflammatory; Leukotriene synthesis inhibitor                                                                                                                                         | 936349-47-2 | Y    | 206     |
| 24     | AM-66              | Pain; Analgesic                                                                                                                                                                                                          | 102121-23-3 |      | 258     |
| 25     | AMG-487            | Inflammatory disease; Psoriasis; Anti-inflammatory; Systemic antipsoriatic product                                                                                                                                       | 473719-41-4 | Y    | 161     |

| Number | Common Name         | Indications                                                                                                                                                    | CAS Number  | Oral | MP (°C) |
|--------|---------------------|----------------------------------------------------------------------------------------------------------------------------------------------------------------|-------------|------|---------|
| 26     | aminolevulinic acid | Psoriasis; Skin tumor; Anticancer; Photosensitizer;<br>Topical antipsoriatic product                                                                           | 106-60-5    |      | 119     |
| 27     | amlodipine maleate  | Angina; Hypertension; Antihypertensive                                                                                                                         | 88150-42-9  | Y    | 179     |
| 28     | amonafile L- malate | Acute myelogenous leukemia; Breast tumor; Prostate<br>tumor; Anticancer; DNA intercalator                                                                      | 69408-81-7  |      | 170     |
| 29     | amsilarotene        | Cancer; Liver tumor; Lung tumor; Renal cell carcinoma;<br>AntiCancer; Apoptosis stimulator                                                                     | 125973-56-0 | Y    | 280     |
| 30     | AN-10               | Alopecia drug-induced; Sickle cell anemia; Thalassemia                                                                                                         | 78417-88-6  |      | 143     |
| 31     | andrographolide     | Cancer; HIV infection; Neurodegenerative disease;<br>Anti-inflammatory; AntiCancer; Antiviral;<br>Neuroprotectant; Unspecified drug target                     | 5508-58-7   |      | 227     |
| 32     | anti-epileptic      | Epilepsy; Anticonvulsant agent; Unspecified drug target                                                                                                        | 125-33-7    | Y    | 282     |
| 33     | antimalarial        | Plasmodium infection; Antiparasitic                                                                                                                            | 54-05-7     |      | 89      |
| 34     | apomorphine         | Female sexual dysfunction; Male sexual dysfunction;<br>Apomorphine modulator                                                                                   | 58-00-4     |      | 195     |
| 35     | apricoxib           | Breast tumor; Cancer; Colorectal tumor; Inflammatory<br>disease; Non-small-cell lung cancer; Pain; Pancreas<br>tumor; Analgesic; Anti-inflammatory; Anticancer | 197904-84-0 | Y    | 162     |
| 36     | AR-132              | Cytomegalovirus infection; Antiviral; Unspecified drug<br>target                                                                                               | 377774-43-1 |      | 230     |
| 37     | ARQ-501             | Cancer; Head and neck tumor; Leiomyosarcoma;<br>Pancreas tumor; Anticancer; Cell cycle inhibitor                                                               | 4707-32-8   |      | 155     |
| 38     | arterolane          | Plasmodium infection; Antiparasitic; Unspecified drug<br>target                                                                                                | 664338-39-0 | Y    | 161     |
| 39     | atamestane          | Breast tumor; Prostate hyperplasia; Anticancer                                                                                                                 | 96301-34-7  | Y    | 158     |
| 40     | avriptan            | Migraine                                                                                                                                                       | 151140-96-4 |      | 174     |
| 41     | azalanstat          | Atherosclerosis; Hyperlipidemia;<br>Antihypercholesterolemic agent                                                                                             | 143393-27-5 |      | 151     |
| 42     | azatadine           | Allergy                                                                                                                                                        | 3964-81-6   |      | 125     |
| 43     | bamirastine         | Allergic rhinitis; Atopic dermatitis; Anti-inflammatory;<br>Eosinophil infiltration inhibitor; Immunosuppressant                                               | 215529-47-8 |      | 111     |
| 44     | batimastat          | Cardiac failure; Cerebral infarction; Gastrointestinal<br>tumor; Lung disease; Lung tumor; Anticancer;<br>Cardioprotectant; Platelet aggregation inhibitor     | 130370-60-4 |      | 237     |
| 45     | beclometasone       | Asthma; Leukotriene synthesis inhibitor; PG synthesis<br>inhibitor                                                                                             | 4419-39-0   |      | 236     |
| 46     | becocalcidiol       | Psoriasis; Keratinocyte modulator; Systemic antipsoriatic<br>product; Topical antipsoriatic product; Vitamin D agonist                                         | 524067-21-8 |      | 163     |
| 47     | bervastatin         | Atherosclerosis; Hypercholesterolemia;<br>Antihypercholesterolemic agent; Thromboxane A2<br>synthesis inhibitor                                                | 132017-01-7 |      | 112     |
| 48     | betamethasone       | Diabetic macular edema; Ophthalmological agent;<br>Steroid modulator                                                                                           | 378-44-9    |      | 238     |



| Number | Common Name                   | Indications                                                                                                                                                                          | CAS Number  | Oral | MP (°C) |
|--------|-------------------------------|--------------------------------------------------------------------------------------------------------------------------------------------------------------------------------------|-------------|------|---------|
| 49     | betamethasone<br>dipropionate | Dermatological disease; Corticosteroid agonist;<br>Dermatological agent; Steroidal anti-inflammatory                                                                                 | 5593-20-4   |      | 177     |
| 50     | bicifadine                    | Diabetic neuropathy; Neuropathic pain; Osteoarthritis;<br>Pain; 5-HT uptake inhibitor; Analgesic; Norepinephrine<br>uptake inhibitor                                                 | 71195-57-8  | Y    | 208     |
| 51     | bicifadine                    | Diabetic neuropathy; Neuropathic pain; Osteoarthritis;<br>Pain; 5-HT uptake inhibitor; Analgesic; Norepinephrine<br>uptake inhibitor                                                 | 71195-57-8  | Y    | 208     |
| 52     | bimakalim                     | Asthma; Ischemic heart disease; Bronchodilator;<br>Vasodilator                                                                                                                       | 117545-11-6 |      | 152     |
| 53     | BIMU-1                        | Emesis; Gastric motility disorder; Pain; Analgesic;<br>Anti-emetic                                                                                                                   | 127595-41-9 |      | 243     |
| 54     | bithionol                     | Cancer; Angiogenesis inhibitor; AntiCancer                                                                                                                                           | 97-18-7     |      | 188     |
| 55     | BMS-187308                    | Hypertension; Antihypertensive                                                                                                                                                       | 153624-15-8 |      | 65      |
| 56     | BMS-223131                    | Irritable bowel syndrome; Overactive bladder                                                                                                                                         | 275375-69-4 |      | 256     |
| 57     | BMS-587101                    | Autoimmune disease; Inflammatory disease; Psoriasis;<br>Anti-inflammatory; Immunomodulator; Systemic<br>antipsoriatic product                                                        | 509083-77-6 | Y    | 220     |
| 58     | BN-82002                      | Cancer; Anticancer                                                                                                                                                                   | 396073-89-5 | Y    | 93      |
| 59     | BP-897                        | Cocaine addiction; Drug dependence                                                                                                                                                   | 192384-87-5 |      | 137     |
| 60     | broxaterol                    | Asthma                                                                                                                                                                               | 76596-57-1  | Y    | 85      |
| 61     | budesonide                    | Asthma; Corticosteroid agonist; Steroidal<br>anti-inflammatory                                                                                                                       | 51333-22-3  |      | 257     |
| 62     | bumetanide                    | Diuresis; Seizure disorder; Anticonvulsant agent;<br>Antidiuretic; Unspecified drug target                                                                                           | 28395-03-1  |      | 231     |
| 63     | buprenorphine                 | Opiate dependence; Mu opioid partial agonist                                                                                                                                         | 52485-79-7  |      | 214     |
| 64     | calcitriol                    | Cancer; Myelodysplastic syndrome; Non-small-cell lung<br>cancer; Pancreas tumor; Prostate tumor; Anticancer;<br>Vitamin D analog                                                     | 32222-06-3  |      | 113     |
| 65     | camobucol                     | Rheumatoid arthritis; Anti-inflammatory; Vascular agent                                                                                                                              | 216167-92-9 | Y    | 165     |
| 66     | camptothecin                  | Cancer; Solid tumor; Angiogenesis inhibitor; Anticancer;<br>DNA synthesis inhibitor                                                                                                  | 7689-03-4   |      | 262     |
| 67     | captopril                     | Hypertension; Antihypertensive                                                                                                                                                       | 62571-86-2  |      | 104     |
| 68     | carbenoxolone                 | Psoriasis; Non-steroidal anti-inflammatory; Retinoid<br>modulator; Topical antipsoriatic product                                                                                     | 5697-56-3   |      | 293     |
| 69     | carboxirole                   | Hypertension; Antihypertensive                                                                                                                                                       | 98323-83-2  |      | 285     |
| 70     | carvedilol                    | Congestive heart failure; Cardiovascular agent                                                                                                                                       | 72956-09-3  | Y    | 114     |
| 71     | CDC-801                       | Crohns disease; Inflammatory disease; Myelodysplastic<br>syndrome; Anti-inflammatory; AntiCancer; Cytokine<br>release inhibitor; Immunosuppressant; TNF alpha<br>synthesis inhibitor | 192819-27-5 | Y    | 166     |
| 72     | CDP-323                       | Inflammatory disease; Multiple sclerosis;<br>Anti-inflammatory                                                                                                                       | 455264-30-9 | Y    | 194     |

| Number | Common Name     | Indications                                                                                                                                                                                                                      | CAS Number   | Oral | MP (°C) |
|--------|-----------------|----------------------------------------------------------------------------------------------------------------------------------------------------------------------------------------------------------------------------------|--------------|------|---------|
| 73     | celecoxib       | Pain; Analgesic; Non-steroidal Anti-inflammatory                                                                                                                                                                                 | 169590-42-5  |      | 161     |
| 74     | cericlamine     | Anorexia nervosa; Anxiety disorder; Depression; 5-HT uptake inhibitor; Antidepressant; Anxiolytic; Appetite modulator                                                                                                            | 112922-55-1  |      | 192     |
| 75     | ceronapril      | Alzheimers disease; Anxiety disorder; Cognitive disorder; Hypertension; Antihypertensive; Anxiolytic                                                                                                                             | 111223-26-8  |      | 193     |
| 76     | CGP-52411       | Cancer; Anticancer; Anticancer protein kinase inhibitor                                                                                                                                                                          | 145915-58-8  |      | 200     |
| 77     | CGP-53716       | Cancer; Anticancer; Anticancer protein kinase inhibitor                                                                                                                                                                          | 152459-94-4  |      | 191     |
| 78     | CGP-60474       | Cancer; Anticancer; Anticancer protein kinase inhibitor                                                                                                                                                                          | 164658-13-3  |      | 146     |
| 79     | CGP-70726       | HIV-1 infection                                                                                                                                                                                                                  | 215312-87-1  |      | 207     |
| 80     | chelerythrine   | Bipolar disorder; Schizophrenia; Antipsychotic                                                                                                                                                                                   | 34316-15-9   | Y    | 207     |
| 81     | CI-953          | Cerebral hypoxia; Head injury; Stroke; Anticonvulsant agent; Vasodilator; Vasoprotectant                                                                                                                                         | 97627-24-2   |      | 211     |
| 82     | cidofovir       | Cytomegalovirus infection; Retinitis; Unspecified drug target; Viral replication inhibitor                                                                                                                                       | 113852-37-2  |      | 260     |
| 83     | cilomilast      | Asthma; Chronic obstructive pulmonary disease; Anti-inflammatory; Bronchodilator                                                                                                                                                 | 153259-65-5  | Y    | 157     |
| 84     | ciprofloxacin   | Osteomyelitis; Antibacterial                                                                                                                                                                                                     | 85721-33-1   |      | 258     |
| 85     | CL-5343         | Cancer; Epilepsy; Glaucoma; Obesity; Anticancer; Anticonvulsant agent; Antiglaucoma agent                                                                                                                                        | 14949-00-9   |      | 216     |
| 86     | clamikalant     | Heart arrhythmia; Myocardial infarction; Class III antiarrhythmic agent                                                                                                                                                          | 158751-64-5  |      | 192     |
| 87     | clinafloxacin   | Bacterial infection; Bacterial pneumonia; Bronchitis; Sepsis; Bacterial nucleic acid synthesis inhibitor                                                                                                                         | 105956-97-6  |      | 256     |
| 88     | clioquinol      | Alzheimers disease; Chelating agent                                                                                                                                                                                              | 130-26-7     | Y    | 176     |
| 89     | clozapine       | Psychotic disorder; Antipsychotic; Unspecified drug target                                                                                                                                                                       | 5786-21-0    |      | 183     |
| 90     | COMP-167        | HIV-1 infection; Antiviral; HIV fusion inhibitor                                                                                                                                                                                 | 313994-79-5  |      | 132     |
| 91     | cotinine        | Nicotine dependence; Obesity; Appetite suppressant; Unspecified drug target                                                                                                                                                      | 486-56-6     |      | 48      |
| 92     | CPI-1189        | Alzheimers disease; HIV associated dementia; Inflammatory bowel disease; Multiple sclerosis; Neuropathic pain; Parkinsons disease; Postherpetic neuralgia; Analgesic; Antiparkinsonian; Neuroprotectant; Unspecified drug target | 183619-38-7  | Y    | 128     |
| 93     | creatine        | Motor neurone disease; Antioxidant agent; Neuroprotectant                                                                                                                                                                        | 57-00-1      |      | 297     |
| 94     | crisnatol       | Brain tumor; Cancer; Anticancer; DNA intercalator                                                                                                                                                                                | 96389-68-3   |      | 201     |
| 95     | cromolyn sodium | Asthma; Bronchodilator; Histamine release modulator; Non-steroidal anti-inflammatory                                                                                                                                             | 16110-51-3   |      | 242     |
| 96     | cryptolepine    | Non-insulin dependent diabetes; Hypoglycemic agent                                                                                                                                                                               | 480-26-2     |      | 174     |
| 97     | CUDC-101        | Cancer; AntiCancer protein kinase inhibitor                                                                                                                                                                                      | 1012054-59-9 | Y    | 176     |
| 98     | cyclizine       | Motion sickness; Anti-emetic                                                                                                                                                                                                     | 82-92-8      |      | 107     |

| Number | Common Name                                     | Indications                                                                                                                                                                                          | CAS Number  | Oral | MP (°C) |
|--------|-------------------------------------------------|------------------------------------------------------------------------------------------------------------------------------------------------------------------------------------------------------|-------------|------|---------|
| 99     | cycloserine<br>(Alzheimer's disease),<br>Searle | Alzheimers disease; Cognitive disorder; Dementia;<br>Schizophrenia                                                                                                                                   | 68-41-7     |      | 156     |
| 100    | cyproterone                                     | Hot flashes                                                                                                                                                                                          | 2098-66-0   |      | 239     |
| 101    | D-68144                                         | Cancer; Anticancer; Cell cycle inhibitor; Tubulin binding<br>agent                                                                                                                                   | 370581-10-5 |      | 148     |
| 102    | DAA-1097                                        | Anxiety disorder; Anxiolytic                                                                                                                                                                         | 220551-79-1 |      | 108     |
| 103    | deferoxamine                                    | Alzheimers disease; Iron chelator; Neuroprotectant;<br>Nootropic agent                                                                                                                               | 70-51-9     |      | 139     |
| 104    | dexanabinal                                     | Brain injury; Cognitive disorder; Multiple sclerosis;<br>Parkinsons disease; Stroke; Antiparkinsonian; Free<br>radical scavenger; Neuroprotectant; Nootropic agent;<br>TNF alpha synthesis inhibitor | 112924-45-5 |      | 142     |
| 105    | dextofisopam                                    | Alternating stool pattern irritable bowel syndrome;<br>Anxiety disorder; Diarrhea predominant irritable bowel<br>syndrome; Anxiolytic; Gastrointestinal system agent;<br>Unspecified drug target     | 82059-50-5  | Y    | 154     |
| 106    | DG-041                                          | Pain; Peripheral arterial occlusive disease; Analgesic;<br>PGE2 antagonist; Platelet aggregation inhibitor                                                                                           | 861238-35-9 | Y    | 237     |
| 107    | diclofenac                                      | Mouth ulcer; Analgesic; Non-steroidal anti-inflammatory                                                                                                                                              | 15307-86-5  |      | 157     |
| 108    | dihydroergotamine<br>mesylate                   | Migraine; Analgesic; Vasoconstrictor                                                                                                                                                                 | 511-12-6    |      | 239     |
| 109    | diltiazem                                       | Angina; Hypertension; Antihypertensive;<br>Cardioprotectant; Class IV antiarrhythmic agent;<br>Vasodilator                                                                                           | 42399-41-7  |      | 213     |
| 110    | DIVA                                            | Non-insulin dependent diabetes; DPP IV inhibitor<br>antidiabetic product; Hypoglycemic agent                                                                                                         | 2834-10-8   | Y    | 84      |
| 111    | dizocilpine                                     | Stroke; Neuroprotectant                                                                                                                                                                              | 77086-21-6  |      | 69      |
| 112    | DMP-543                                         | Alzheimers disease; Acetylcholine release stimulator                                                                                                                                                 | 160588-45-4 |      | 164     |
| 113    | DMP-696                                         | Anxiety disorder; Depression; Antidepressant; Anxiolytic                                                                                                                                             | 202578-52-7 |      | 123     |
| 114    | docetaxel                                       | Cancer; Cell cycle inhibitor; Microtubule inhibitor                                                                                                                                                  | 114977-28-5 |      | 232     |
| 115    | doxorubicin                                     | Bladder tumor; Brain tumor; Cancer; Liver tumor; Lung<br>tumor; Sarcoma; Anticancer                                                                                                                  | 23214-92-8  |      | 218     |
| 116    | D-Pinitol                                       | Alzheimers disease                                                                                                                                                                                   | 10284-63-6  | Y    | 186     |
| 117    | DPP-728                                         | Non-insulin dependent diabetes; DPP IV inhibitor<br>antidiabetic product; Glucagon-like peptide 1 metabolism<br>modulator                                                                            | 247016-69-9 |      | 167     |
| 118    | droloxifene                                     | Breast tumor; Hyperlipidemia; Osteoporosis; Anticancer;<br>Antihyperlipidemic agent                                                                                                                  | 82413-20-5  |      | 161     |
| 119    | D-serine                                        | Alzheimers disease; Autism; Schizophrenia;<br>Antipsychotic; Neuroprotectant                                                                                                                         | 312-84-5    | Y    | 222     |

| Number | Common Name        | Indications                                                                                                                                                                                                                                  | CAS Number  | Oral | MP (°C) |
|--------|--------------------|----------------------------------------------------------------------------------------------------------------------------------------------------------------------------------------------------------------------------------------------|-------------|------|---------|
| 120    | DSP-7238           | Diabetes mellitus; DPP IV inhibitor antidiabetic product;<br>Glucagon-like peptide 1 metabolism modulator;<br>Hypoglycemic agent                                                                                                             | 274901-16-5 | Y    | 149     |
| 121    | DuP-105            | Bacterial infection; Mycobacterium tuberculosis infection;<br>Antibacterial                                                                                                                                                                  | 96800-41-8  |      | 181     |
| 122    | DuP-167            | Hypertension; Antihypertensive                                                                                                                                                                                                               | 114798-36-6 |      | 155     |
| 123    | E-0722             | Diabetic cataract; Diabetic complication; Anticataract<br>agent                                                                                                                                                                              | 102916-95-0 |      | 233     |
| 124    | E-3330             | Hepatitis                                                                                                                                                                                                                                    | 136164-66-4 |      | 57      |
| 125    | EB-1053            | Osteoporosis; Bone resorption inhibitor; Unspecified drug<br>target                                                                                                                                                                          | 125946-91-0 |      | 241     |
| 126    | ebseen             | Arthritis; Brain hemorrhage; Cerebral infarction;<br>Inflammatory disease; Liver disease; Parkinsons<br>disease; Plasmodium infection; Stroke;<br>Anti-inflammatory; Antioxidant agent; Antiparkinsonian;<br>Neuroprotectant                 | 60940-34-3  | Y    | 181     |
| 127    | ecadotril          | Cardiac failure; Hypertension; Antihypertensive                                                                                                                                                                                              | 112573-73-6 |      | 71      |
| 128    | elmustine          | Cancer; Anticancer; Anticancer alkylating agent;<br>Cytostatic                                                                                                                                                                               | 60784-46-5  |      | 56      |
| 129    | elopiprazole       | Psychotic disorder; Antipsychotic                                                                                                                                                                                                            | 115464-77-2 |      | 119     |
| 130    | elsibucol          | Transplant rejection; Immunosuppressant                                                                                                                                                                                                      | 216167-95-2 | Y    | 139     |
| 131    | emivirine          | HIV infection; Non-nucleoside reverse transcriptase<br>inhibitor                                                                                                                                                                             | 149950-60-7 | Y    | 109     |
| 132    | enoximone          | Cardiac failure; Inotropic agent; Vasodilator                                                                                                                                                                                                | 77671-31-9  | Y    | 257     |
| 133    | eperezolid         | Bacterial infection; Bacterial pneumonia; Bacterial skin<br>infection; Bacterial protein synthesis inhibitor; Protein<br>synthesis inhibitor; Ribosome binding agent; Systemic<br>dermatological antibacterial product                       | 165800-04-4 |      | 174     |
| 134    | epinastine         | Allergic rhinitis; Rhinitis; Anti-inflammatory                                                                                                                                                                                               | 80012-43-7  |      | 207     |
| 135    | epristeride        | Acne; Prostate disease; Prostate hyperplasia                                                                                                                                                                                                 | 119169-78-7 | Y    | 246     |
| 136    | ergotamine         | Migraine; 5-HT 1 receptor partial agonist; Vascular agent                                                                                                                                                                                    | 113-15-5    |      | 214     |
| 137    | ES-285             | Cancer; Solid tumor; Anticancer                                                                                                                                                                                                              | 196497-48-0 |      | 68      |
| 138    | esonarimod         | Rheumatoid arthritis; Anti-inflammatory                                                                                                                                                                                                      | 101973-77-7 |      | 96      |
| 139    | estradiol          | Estrogen deficiency; Hormone deficiency; Estradiol<br>agonist                                                                                                                                                                                | 50-28-2     |      | 176     |
| 140    | etalocib           | Asthma; Cancer; Inflammatory bowel disease;<br>Inflammatory disease; Non-small-cell lung cancer;<br>Pancreas tumor; Psoriasis; Rheumatoid arthritis;<br>Ulcerative colitis; Anti-inflammatory; Anticancer;<br>Systemic antipsoriatic product | 161172-51-6 | Y    | 69      |
| 141    | ethacrynate sodium | Glaucoma; Ocular hypertension; Ocular inflammation;<br>Anti-inflammatory; Antiglaucoma agent; Unspecified drug<br>target                                                                                                                     | 58-54-8     |      | 119     |

| Number | Common Name  | Indications                                                                                                                                                                            | CAS Number  | Oral | MP (°C) |
|--------|--------------|----------------------------------------------------------------------------------------------------------------------------------------------------------------------------------------|-------------|------|---------|
| 142    | etoposide    | Brain tumor; AntiCancer; AntiCancer alkylating agent;<br>DNA synthesis inhibitor                                                                                                       | 33419-42-0  | Y    | 244     |
| 143    | F-2692       | Anxiety disorder; Anxiolytic; Unspecified drug target                                                                                                                                  | 133220-91-4 |      | 179     |
| 144    | fampridine   | Charcot Marie Tooth disease; Diabetic neuropathy;<br>Guillain Barre syndrome; Analgesic                                                                                                | 504-24-5    |      | 158     |
| 145    | farglitazar  | Cardiovascular disease; Fibrosis; Non-insulin dependent<br>diabetes; Unidentified indication; Hypoglycemic agent;<br>Insulin sensitizer                                                | 196808-45-4 |      | 149     |
| 146    | fasidotril   | Congestive heart failure; Renovascular hypertension;<br>Antihypertensive                                                                                                               | 135038-57-2 |      | 104     |
| 147    | felodipine   | Central nervous system disease; Hypertension;<br>Antihypertensive; CNS modulator; Cardiac agent                                                                                        | 72509-76-3  |      | 142     |
| 148    | fenretinide  | Age related macular degeneration; Diabetic retinopathy;<br>Ocular disease; Ocular antineovascularisation agent;<br>Ophthalmological agent; Retinoid modulator; Vitamin A<br>antagonist | 65646-68-6  | Y    | 172     |
| 149    | fentanyl     | Pain; Analgesic                                                                                                                                                                        | 437-38-7    |      | 85      |
| 150    | firategrast  | Asthma; Crohns disease; Inflammatory bowel disease;<br>Multiple sclerosis; Rheumatoid arthritis;<br>Anti-inflammatory                                                                  | 402567-16-2 | Y    | 155     |
| 151    | fluconazole  | Candida infection; Ergosterol synthesis inhibitor;<br>Fungicide                                                                                                                        | 86386-73-4  |      | 138     |
| 152    | flourouracil | Brain tumor; Anticancer; Folate synthesis inhibitor; RNA<br>synthesis inhibitor                                                                                                        | 51-21-8     |      | 283     |
| 153    | fluoxetine   | Autism; 5-HT uptake inhibitor                                                                                                                                                          | 54910-89-3  | Y    | 158     |
| 154    | flupirtine   | Creutzfeldt Jakob disease                                                                                                                                                              | 56995-20-1  |      | 116     |
| 155    | gacyclidine  | Brain injury; Spinal cord injury                                                                                                                                                       | 68134-81-6  |      | 81      |
| 156    | gedocarnil   | Inflammatory disease; Osteoarthritis; Pain; Rheumatoid<br>arthritis; Analgesic; Apoptosis stimulator; Non-steroidal<br>anti-inflammatory                                               | 156897-06-2 |      | 160     |
| 157    | Genz-644282  | Cancer; Solid tumor; AntiCancer                                                                                                                                                        | 529488-28-6 |      | 256     |
| 158    | GL-331       | Colorectal tumor; Lung tumor; Stomach tumor;<br>Anticancer                                                                                                                             | 127882-73-9 |      | 206     |
| 159    | glutathione  | HIV infection; Antiviral                                                                                                                                                               | 70-18-8     | Y    | 191     |
| 160    | glycine      | Neuropathic pain; Analgesic                                                                                                                                                            | 56-40-6     | Y    | 245     |
| 161    | glycyrrhizin | Influenza virus infection; SARS coronavirus infection;<br>Antiviral; Unspecified drug target                                                                                           | 1405-86-3   |      | 216     |
| 162    | gossypol     | Bladder tumor; Prostate tumor; Anticancer; Cytostatic;<br>Unspecified drug target                                                                                                      | 303-45-7    |      | 189     |
| 163    | GSI-136      | Alzheimers disease; Beta amyloid synthesis inhibitor;<br>Neuroprotectant; Nootropic agent                                                                                              | 443989-01-3 | Y    | 116     |

| Number | Common Name          | Indications                                                                                                                                                                           | CAS Number  | Oral | MP (°C) |
|--------|----------------------|---------------------------------------------------------------------------------------------------------------------------------------------------------------------------------------|-------------|------|---------|
| 164    | guanfacine           | Anxiety disorder; Attention deficit hyperactivity disorder; Hyperactivity; Anxiolytic; Noradrenaline release modulator; Psychomodulator                                               | 29110-47-2  |      | 226     |
| 165    | GW-844520            | Plasmodium infection; Antiparasitic; Electron transport inhibitor                                                                                                                     | 137735-25-2 |      | 273     |
| 166    | harmol               | Alzheimers disease                                                                                                                                                                    | 487-03-6    |      | 306     |
| 167    | HP-3                 | Chronic bronchitis; Chronic obstructive pulmonary disease; Cystic fibrosis; Expectorant; Mucolytic agent; Unspecified drug target                                                     | 9002-86-2   |      | 168     |
| 168    | huperzine A          | Alzheimers disease; Neuroprotectant; Nootropic agent                                                                                                                                  | 102518-79-6 | Y    | 223     |
| 169    | hydromorphone        | Cancer pain; Pain; Analgesic                                                                                                                                                          | 466-99-9    |      | 265     |
| 170    | hydroxychloroquine   | Asthma; Respiratory disease; Anti-inflammatory; Unspecified drug target                                                                                                               | 118-42-3    |      | 90      |
| 171    | hypothemycin         | Cancer; Anticancer                                                                                                                                                                    | 76958-67-3  |      | 171     |
| 172    | ibipinabant          | Metabolic disorder; Obesity; Psychotic disorder; Schizophrenia; Antipsychotic                                                                                                         | 464213-10-3 |      | 161     |
| 173    | ibuprofen            | Inflammatory disease; Osteoarthritis; Pain; Rheumatoid arthritis; Analgesic; Non-steroidal anti-inflammatory                                                                          | 15687-27-1  |      | 76      |
| 174    | ICI-198615           | Asthma; Lung inflammation; Respiratory disease; Anti-inflammatory                                                                                                                     | 104448-53-5 |      | 181     |
| 175    | imepitoin            | Epilepsy; Anticonvulsant agent; GABA modulator                                                                                                                                        | 188116-07-6 |      | 264     |
| 176    | imiquimod            | Keratosis; Dermatological agent; Unspecified drug target                                                                                                                              | 99011-02-6  |      | 293     |
| 177    | incyclinide          | Acne; Cancer; Inflammatory disease; Kaposi sarcoma; Lung injury; Rosacea; Anti-inflammatory; Anticancer; Metastasis inhibitor                                                         | 15866-90-7  | Y    | 215     |
| 178    | inosine              | Glaucoma; Neurodegenerative disease; Spinal cord injury; Stroke; Antiglaucoma agent; Neuroprotectant                                                                                  | 58-63-9     |      | 217     |
| 179    | intoplicine          | Solid tumor; Anticancer                                                                                                                                                               | 125974-72-3 |      | 217     |
| 180    | IPL-576092           | Asthma; Dermatitis; Ocular disease; Anti-inflammatory; Leukocyte inhibitor                                                                                                            | 202415-99-4 |      | 183     |
| 181    | ipsapirone           | Anxiety disorder; Depression; Drug dependence; Antidepressant; Anxiolytic                                                                                                             | 95847-70-4  |      | 138     |
| 182    | isbogrel             | Angina; Stroke; Thromboembolism; Platelet aggregation inhibitor; Thromboxane A2 antagonist; Thromboxane A2 synthesis inhibitor                                                        | 89667-40-3  |      | 132     |
| 183    | isomazole            | Asthma; Cardiac failure; Bronchodilator; Inotropic agent                                                                                                                              | 86315-52-8  |      | 145     |
| 184    | isosorbide dinitrate | Anal fissure; Hemorrhoids; Nitric oxide donor; Vascular agent                                                                                                                         | 87-33-2     |      | 61      |
| 185    | isovaleramide        | Bipolar disorder; Epilepsy; Migraine; Neurological disease; Psychiatric disorder; Analgesic; Anticonvulsant agent; Antidepressant; Antipsychotic; Anxiolytic; Unspecified drug target | 541-46-8    |      | 135     |
| 186    | israpafant           | Asthma; Anti-inflammatory                                                                                                                                                             | 117279-73-9 | Y    | 131     |

| Number | Common Name     | Indications                                                                                                                                                                                                                           | CAS Number  | Oral | MP (°C) |
|--------|-----------------|---------------------------------------------------------------------------------------------------------------------------------------------------------------------------------------------------------------------------------------|-------------|------|---------|
| 187    | itasetron       | Anxiety disorder; Dementia; Emesis; Anti-emetic;<br>Anxiolytic                                                                                                                                                                        | 123258-84-4 |      | 206     |
| 188    | JNJ-16259685    | Anxiety disorder; Pain; Panic disorder; Stroke; Analgesic;<br>Anxiolytic                                                                                                                                                              | 409345-29-5 |      | 115     |
| 189    | K-252c          | Alzheimers disease; Nootropic agent                                                                                                                                                                                                   | 85753-43-1  |      | 310     |
| 190    | KB-5492         | Peptic ulcer; Ulcer; Gastric mucus enhancer; Gastric<br>secretion inhibitor; Unspecified drug target                                                                                                                                  | 113594-64-2 |      | 96      |
| 191    | ketoprofen      | Inflammatory disease; Pain; Non-steroidal<br>anti-inflammatory; Unspecified drug target                                                                                                                                               | 22071-15-4  |      | 94      |
| 192    | KRI-1314        | Hypertension; Antihypertensive                                                                                                                                                                                                        | 128053-53-2 |      | 102     |
| 193    | KU-1257         | Duodenal ulcer; Stomach ulcer; Histamine H2 antagonist<br>antiulcerant product                                                                                                                                                        | 120958-90-9 |      | 81      |
| 194    | KW-4490         | Asthma; Bronchodilator                                                                                                                                                                                                                | 260561-48-6 | Y    | 245     |
| 195    | L-651582        | Non-small-cell lung cancer; Ovary tumor; Renal cell<br>carcinoma; Solid tumor; Angiogenesis inhibitor;<br>Anticancer                                                                                                                  | 99519-84-3  |      | 201     |
| 196    | L-701324        | Epilepsy; Psychotic disorder; Stroke; Anticonvulsant<br>agent; Antipsychotic; NMDA glycine antagonist;<br>Neuroprotectant                                                                                                             | 142326-59-8 |      | 308     |
| 197    | L-alanosine     | Acute lymphoblastic leukemia; Brain tumor; Cancer;<br>Glioma; Lung tumor; Mesothelioma; Non-small-cell lung<br>cancer; Osteosarcoma; Pancreas tumor; Sarcoma;<br>Anticancer antimetabolite; Purine nucleotide metabolism<br>modulator | 5854-93-3   |      | 186     |
| 198    | LAS-38096       | Asthma; Inflammatory disease; Anti-inflammatory                                                                                                                                                                                       | 851371-22-7 | Y    | 174     |
| 199    | latrepirdine    | Alzheimers disease; Huntingtons chorea; Energy<br>metabolism modulator; Nootropic agent                                                                                                                                               | 3613-73-8   | Y    | 118     |
| 200    | LB-30057        | Thromboembolism                                                                                                                                                                                                                       | 184770-78-3 | Y    | 181     |
| 201    | letaxaban       | Coronary artery disease; Thromboembolism;<br>Coagulation inhibitor                                                                                                                                                                    | 870262-90-1 | Y    | 174     |
| 202    | levamisole      | Allergic rhinitis; Anti-inflammatory; Unspecified drug<br>target                                                                                                                                                                      | 14769-73-4  |      | 146     |
| 203    | levcromakalim   | Asthma; Hypertension; Antihypertensive                                                                                                                                                                                                | 94535-50-9  |      | 241     |
| 204    | levobupivacaine | Topical anesthesia; Local anesthetic; Unspecified drug<br>target                                                                                                                                                                      | 27262-47-1  |      | 136     |
| 205    | liarozole       | Head and neck tumor; Ichthyosis; Leukemia; Lung tumor;<br>Prostate tumor; Psoriasis; Anticancer; Retinoid<br>modulator; Systemic antipsoriatic product                                                                                | 115575-11-6 | Y    | 108     |
| 206    | licarbazepine   | Epilepsy; Anticonvulsant agent                                                                                                                                                                                                        | 29331-92-8  |      | 187     |
| 207    | lidocaine       | Pain; Analgesic; Local anesthetic                                                                                                                                                                                                     | 137-58-6    |      | 68      |
| 208    | lidorestat      | Diabetic neuropathy; Vasoprotectant                                                                                                                                                                                                   | 245116-90-9 |      | 178     |

| Number | Common Name               | Indications                                                                                                                                                                                                                           | CAS Number  | Oral | MP (°C) |
|--------|---------------------------|---------------------------------------------------------------------------------------------------------------------------------------------------------------------------------------------------------------------------------------|-------------|------|---------|
| 209    | lifiquat                  | Asthma; Erectile dysfunction; Neurodegenerative disease; Sepsis; Thromboembolism; Bronchodilator; Platelet aggregation inhibitor                                                                                                      | 170632-47-0 |      | 111     |
| 210    | linifanib                 | Acute myelogenous leukemia; Breast tumor; Cancer; Colorectal tumor; Hepatocellular carcinoma; Myelodysplastic syndrome; Non-small-cell lung cancer; Renal cell carcinoma; Angiogenesis inhibitor; Anticancer protein kinase inhibitor | 796967-16-3 | Y    | 210     |
| 211    | lisuride                  | Parkinsons disease; Restless legs syndrome; Antiparkinsonian                                                                                                                                                                          | 18016-80-3  |      | 186     |
| 212    | LL-Z-1640-2               | Bacterial infection; Macrolide antibiotic                                                                                                                                                                                             | 253863-19-3 |      | 170     |
| 213    | loratadine                | Allergic rhinitis; Anti-inflammatory                                                                                                                                                                                                  | 79794-75-5  |      | 133     |
| 214    | lorazepam                 | Anxiety disorder; Seizure disorder; Anticonvulsant agent; Anxiolytic                                                                                                                                                                  | 846-49-1    |      | 167     |
| 215    | loteprednol etabonate     | Atopic dermatitis; Corticosteroid agonist; Dermatological agent; Steroidal anti-inflammatory                                                                                                                                          | 82034-46-6  |      | 222     |
| 216    | loxiglumide               | Cancer; Eating disorder; Gastric motility disorder; Gastrointestinal disease; Pancreatitis; Anticancer; Anticancer hormone antagonist                                                                                                 | 107097-80-3 | Y    | 114     |
| 217    | luzindole                 | Sleep disorder                                                                                                                                                                                                                        | 117946-91-5 |      | 104     |
| 218    | LY-674                    | Atherosclerosis; Hyperlipidemia; Syndrome X; Antiarteriosclerotic; Antihyperlipidemic agent                                                                                                                                           | 425671-29-0 |      | 131     |
| 219    | masoprocol                | Cancer; Dermatological disease; Non-insulin dependent diabetes; Anticancer; Antioxidant agent                                                                                                                                         | 27686-84-6  |      | 186     |
| 220    | MCI-225                   | Alzheimers disease; Depression; Neurodegenerative disease; Antidepressant; Nootropic agent; Norepinephrine uptake inhibitor                                                                                                           | 99487-25-9  |      | 156     |
| 221    | MDL-11939                 | Anxiety disorder; Depression; Antidepressant; Anxiolytic                                                                                                                                                                              | 107703-78-6 |      | 127     |
| 222    | MDL-29311                 | Atherosclerosis; Hyperlipidemia; Antihyperlipidemic agent; Bile acid sequestrant; Free radical scavenger                                                                                                                              | 129895-82-5 |      | 95      |
| 223    | ME-3738                   | Hepatitis; Hepatitis C virus infection; Antiviral; IL-6 modulator; Protectant                                                                                                                                                         | 186415-82-7 | Y    | 239     |
| 224    | mecamylamine              | Diarrhea; Irritable bowel syndrome; Antidiarrhoeal                                                                                                                                                                                    | 60-40-2     |      | 251     |
| 225    | meglumine-GLA             | Bladder tumor; Cancer; Anticancer; Unspecified drug target                                                                                                                                                                            | 6284-40-8   |      | 127     |
| 226    | melphalan                 | Melanoma; AntiCancer alkylating agent                                                                                                                                                                                                 | 148-82-3    |      | 173     |
| 227    | menogaril                 | Breast tumor; Leukemia; Lung tumor; Lymphoma; Mesothelioma; Solid tumor; Anticancer alkylating agent; DNA intercalator                                                                                                                | 71628-96-1  |      | 251     |
| 228    | methylprednisolone        | Pain; Spinal cord injury; Analgesic; Corticosteroid agonist; Steroidal Anti-inflammatory                                                                                                                                              | 83-43-2     |      | 233     |
| 229    | methylthioninium chloride | Hepatitis C virus infection; Antiviral; Photosensitizer; RNA synthesis inhibitor                                                                                                                                                      | 61-73-4     | Y    | 92      |



| Number | Common Name    | Indications                                                                                                                                                                                                | CAS Number  | Oral | MP (°C) |
|--------|----------------|------------------------------------------------------------------------------------------------------------------------------------------------------------------------------------------------------------|-------------|------|---------|
| 230    | metoclopramide | Brain tumor; Cancer; Inflammatory disease; Lung tumor;<br>Anti-inflammatory; Anticancer; Radiosensitizer                                                                                                   | 364-62-5    |      | 147     |
| 231    | metronidazole  | Bacterial infection; Female genital tract infection;<br>Antibacterial; Unspecified drug target                                                                                                             | 443-48-1    |      | 160     |
| 232    | miconazole     | Candida albicans infection; Female genital tract infection;<br>Fungicide; Unspecified drug target                                                                                                          | 22916-47-8  |      | 185     |
| 233    | mifepristone   | HIV infection; Hepatitis C virus infection; Viral replication<br>inhibitor                                                                                                                                 | 84371-65-3  | Y    | 150     |
| 234    | minalrestat    | Diabetic complication                                                                                                                                                                                      | 129688-50-2 |      | 232     |
| 235    | minoxidil      | Alopecia; Vasodilator                                                                                                                                                                                      | 38304-91-5  |      | 256     |
| 236    | mitoguazone    | Head and neck tumor; Hodgkins disease; Lung tumor;<br>Lymphoma; Non-Hodgkin lymphoma; Prostate tumor;<br>Anticancer; Polyamine synthesis inhibitor                                                         | 459-86-9    |      | 225     |
| 237    | MK-0557        | Obesity; Schizophrenia; Antipsychotic; Appetite<br>suppressant                                                                                                                                             | 328232-95-7 | Y    | 239     |
| 238    | monolaurin     | Congenital ichthyosiform erythroderma; Dermatitis;<br>Dermatological disease; Ichthyosis; Impetigo;<br>Antibacterial; Surfactant; Topical dermatological<br>antibacterial product; Unspecified drug target | 27215-38-9  |      | 56      |
| 239    | mopidamol      | Cancer; Lung tumor; Anticancer                                                                                                                                                                             | 13665-88-8  |      | 158     |
| 240    | morphine       | Pain; Analgesic                                                                                                                                                                                            | 57-27-2     |      | 248     |
| 241    | muraglitazar   | Metabolic disorder; Non-insulin dependent diabetes;<br>Antihyperlipidemic agent; Hypoglycemic agent; Insulin<br>sensitizer                                                                                 | 331741-94-7 | Y    | 140     |
| 242    | naltrexone     | Alcoholism; Opiate dependence                                                                                                                                                                              | 16590-41-3  |      | 172     |
| 243    | navarixin      | Asthma; Chronic obstructive pulmonary disease;<br>Inflammatory disease; Psoriasis; Respiratory disease;<br>Anti-inflammatory; Respiratory system agent; Systemic<br>antipsoriatic product                  | 473727-83-2 | Y    | 119     |
| 244    | navuridine     | HIV infection                                                                                                                                                                                              | 84472-85-5  |      | 167     |
| 245    | NC-002         | Premenstrual syndrome                                                                                                                                                                                      | 575-38-2    |      | 177     |
| 246    | NC-003         | Myalgia; Analgesic; Unspecified drug target                                                                                                                                                                | 173792-20-6 |      | 204     |
| 247    | nefiracetam    | Alzheimers disease; Dementia; Depression; Psychiatric<br>disorder; Antidepressant; Antipsychotic; Neurotransmitter<br>release stimulator; Nootropic agent                                                  | 77191-36-7  | Y    | 153     |
| 248    | netupitant     | Chemotherapy-induced emesis; Emesis; Gastrointestinal<br>pain; Overactive bladder; Analgesic; Anti-emetic;<br>Gastrointestinal system agent                                                                | 290297-26-6 |      | 158     |
| 249    | nifedipine     | Angina; Hypertension; Raynauds disease;<br>Antihypertensive; Class IV antiarrhythmic agent;<br>Vasodilator                                                                                                 | 21829-25-4  |      | 172     |
| 250    | NNC-25-0926    | Non-insulin dependent diabetes; Hypoglycemic agent                                                                                                                                                         | 385836-22-6 |      | 157     |

| Number | Common Name   | Indications                                                                                                                                                                               | CAS Number  | Oral | MP (°C) |
|--------|---------------|-------------------------------------------------------------------------------------------------------------------------------------------------------------------------------------------|-------------|------|---------|
| 251    | NNC-55-0118   | Insulin dependent diabetes; Non-insulin dependent diabetes                                                                                                                                | 194086-39-0 |      | 282     |
| 252    | nolatrexed    | Cancer; Colon tumor; Head and neck tumor; Hepatocellular carcinoma; Lung tumor; Pancreas tumor; Prostate tumor; Solid tumor; Anticancer; Folate synthesis inhibitor; Radiochemosensitizer | 147149-76-6 |      | 301     |
| 253    | norketotifen  | Ocular disease; Anti-inflammatory; Ophthalmological agent                                                                                                                                 | 34580-20-6  |      | 165     |
| 254    | NPC-15199     | Dermatitis; Inflammatory bowel disease; Septic shock; Anti-inflammatory; Immunomodulator; Unspecified drug target                                                                         | 35661-60-0  |      | 151     |
| 255    | NS-1608       | Stroke; Antihypertensive                                                                                                                                                                  | 160383-80-2 |      | 178     |
| 256    | omeprazole    | Gastroesophageal reflux; Gastrointestinal system agent                                                                                                                                    | 73590-58-6  | Y    | 156     |
| 257    | ondansetron   | Chemotherapy-induced emesis; Anti-emetic                                                                                                                                                  | 99614-02-5  |      | 238     |
| 258    | ONX-0801      | Cancer; Solid tumor; Anticancer                                                                                                                                                           | 501332-69-0 |      | 173     |
| 259    | opaviraline   | HIV-1 infection; Non-nucleoside reverse transcriptase inhibitor                                                                                                                           | 178040-94-3 |      | 124     |
| 260    | Org-41793     | Pain; Analgesic                                                                                                                                                                           | 182417-73-8 |      | 145     |
| 261    | Org-48762-0   | Inflammatory disease; Anti-inflammatory                                                                                                                                                   | 755753-89-0 |      | 124     |
| 262    | oxibendazole  | Helminth infection; Antiparasitic; Unspecified drug target                                                                                                                                | 20559-55-1  |      | 230     |
| 263    | oxycodone     | Pain; Analgesic                                                                                                                                                                           | 76-42-6     | Y    | 219     |
| 264    | P-57          | Eating disorder; Non-insulin dependent diabetes; Obesity; Appetite suppressant; Unspecified drug target                                                                                   | 384329-61-7 |      | 138     |
| 265    | PA-48153C     | Arthritis; Autoimmune disease; Fungal infection; Immune disorder; Fungicide; Immunosuppressant; Unspecified drug target                                                                   | 151519-02-7 |      | 76      |
| 266    | paclitaxel    | Breast tumor; Lung tumor; Ovary tumor; Prostate tumor; Anticancer; Microtubule stabilizer; Tubulin binding agent                                                                          | 33069-62-4  |      | 215     |
| 267    | pafuramidine  | Mycobacterium tuberculosis infection; Parasitic infection; Plasmodium infection; Pneumocystis carinii infection; Trypanosomiasis; Antibacterial; Antiparasitic; Fungicide                 | 186953-56-0 | Y    | 193     |
| 268    | palifosfamide | Cancer; AntiCancer; AntiCancer alkylating agent                                                                                                                                           | 31645-39-3  | Y    | 107     |
| 269    | panadiplon    | Anxiety disorder; Anxiolytic                                                                                                                                                              | 124423-84-3 |      | 169     |
| 270    | panamesine    | Psychotic disorder; Schizophrenia; Antipsychotic                                                                                                                                          | 139225-22-2 |      | 165     |
| 271    | parthenolide  | Migraine                                                                                                                                                                                  | 20554-84-1  |      | 116     |
| 272    | patamostat    | Hypotension; Pancreatitis; Hypertensive                                                                                                                                                   | 114568-26-2 |      | 202     |
| 273    | PC-190723     | Bacterial infection; Staphylococcus infection; Antibacterial                                                                                                                              | 951120-33-5 |      | 215     |
| 274    | PD-0183812    | Cancer; Retinoblastoma; Anticancer protein kinase inhibitor; Cell cycle inhibitor                                                                                                         | 211247-24-4 |      | 223     |
| 275    | PD-117558     | Bacterial infection; Bacterial nucleic acid synthesis inhibitor                                                                                                                           | 99734-97-1  |      | 257     |
| 276    | PD-146176     | Atherosclerosis; Anti-inflammatory; Antiarteriosclerotic                                                                                                                                  | 4079-26-9   |      | 160     |

| Number | Common Name                    | Indications                                                                                                                                                                                                                        | CAS Number   | Oral | MP (°C) |
|--------|--------------------------------|------------------------------------------------------------------------------------------------------------------------------------------------------------------------------------------------------------------------------------|--------------|------|---------|
| 277    | PD-184352                      | Breast tumor; Cancer; Colon tumor; Non-small-cell lung cancer; Pancreas tumor; Transplant rejection; Anticancer; Anticancer protein kinase inhibitor; Immunosuppressant                                                            | 212631-79-3  |      | 172     |
| 278    | perzinfotel                    | Neuropathic pain; Stroke; Analgesic; Neuroprotectant                                                                                                                                                                               | 144912-63-0  |      | 269     |
| 279    | PF-2413873                     | Endometriosis                                                                                                                                                                                                                      | 936345-35-6  |      | 164     |
| 280    | PF-4191834                     | Asthma; Inflammatory disease; Pain; Analgesic; Anti-inflammatory                                                                                                                                                                   | 1029317-21-2 | Y    | 173     |
| 281    | PF-610355                      | Asthma; Chronic obstructive pulmonary disease; Bronchodilator; Respiratory system agent                                                                                                                                            | 862541-45-5  |      | 198     |
| 282    | PG-301029                      | Cancer; HIV infection; Hepatitis C virus infection; Anticancer; Antiviral; RNA synthesis inhibitor; Viral replication inhibitor                                                                                                    | 97149-60-5   | Y    | 249     |
| 283    | phenoxybenzamine hydrochloride | Cardiovascular disease; Pain; Prostate hyperplasia; Urinary tract disease; Antihypertensive                                                                                                                                        | 59-96-1      |      | 39      |
| 284    | pibutidine                     | Ulcer                                                                                                                                                                                                                              | 103922-33-4  |      | 228     |
| 285    | pimagedine                     | Crohns disease; Diabetic complication; Diabetic nephropathy; Hyperlipidemia; Inflammatory bowel disease; Renal disease; Skin allergy; Ulcerative colitis; Glycosylation inhibitor; NO synthesis inhibitor                          | 79-17-4      | Y    | 133     |
| 286    | pimecrolimus                   | Asthma; Dermatitis; Inflammatory bowel disease; Psoriasis; Rheumatoid arthritis; Anti-inflammatory; Mast cell degranulation inhibitor; Systemic antipsoriatic product; Unspecified cytokine receptor antagonist                    | 137071-32-0  |      | 136     |
| 287    | piritrexim                     | Bladder tumor; Cancer; Kaposi sarcoma; Sarcoma; Anticancer antimetabolite                                                                                                                                                          | 72732-56-0   |      | 253     |
| 288    | PNU-142721                     | HIV-1 infection; Non-nucleoside reverse transcriptase inhibitor                                                                                                                                                                    | 185220-03-5  |      | 158     |
| 289    | PNU-99194A                     | Schizophrenia; Antipsychotic                                                                                                                                                                                                       | 82668-33-5   |      | 212     |
| 290    | prasterone                     | Addisons disease; Alzheimers disease                                                                                                                                                                                               | 53-43-0      |      | 151     |
| 291    | pregnenolone                   | Schizophrenia; Antipsychotic                                                                                                                                                                                                       | 145-13-1     | Y    | 189     |
| 292    | Procysteine                    | Central nervous system disease; Dermatitis; HIV infection; Injury; Motor neurone disease; Renal disease; Respiratory distress syndrome; Sepsis; Anti-inflammatory; Antioxidant agent; Antiviral; Glutathione modulator; Protectant | 19771-63-2   |      | 173     |
| 293    | Progesterin                    | Estrogen deficiency                                                                                                                                                                                                                | 57-83-0      |      | 127     |
| 294    | PSI-6130                       | Hepatitis C virus infection; Antiviral                                                                                                                                                                                             | 817204-33-4  | Y    | 218     |
| 295    | psychostimulant                | Sleep disorder; Psychostimulant; Unspecified drug target                                                                                                                                                                           | 17590-01-1   | Y    | 86      |
| 296    | R-1487                         | Rheumatoid arthritis                                                                                                                                                                                                               | 449811-92-1  |      | 187     |
| 297    | R-1503                         | Rheumatoid arthritis; Anti-inflammatory                                                                                                                                                                                            | 449811-01-2  |      | 158     |
| 298    | raclopride                     | Psychotic disorder; Antipsychotic                                                                                                                                                                                                  | 84225-95-6   |      | 50      |

| Number | Common Name    | Indications                                                                                                                                                                                                                 | CAS Number  | Oral | MP (°C) |
|--------|----------------|-----------------------------------------------------------------------------------------------------------------------------------------------------------------------------------------------------------------------------|-------------|------|---------|
| 299    | ragaglitazar   | Hyperlipidemia; Non-insulin dependent diabetes;<br>Antihyperlipidemic agent; Hypoglycemic agent; Insulin sensitizer                                                                                                         | 222834-30-2 |      | 90      |
| 300    | ramipril       | Congestive heart failure; Hypertension; Antihypertensive                                                                                                                                                                    | 87333-19-5  |      | 110     |
| 301    | reglitazar     | Non-insulin dependent diabetes; Hypoglycemic agent;<br>Insulin sensitizer                                                                                                                                                   | 170861-63-9 |      | 155     |
| 302    | resatorvid     | Sepsis; Antibacterial                                                                                                                                                                                                       | 243984-11-4 |      | 62      |
| 303    | Restacorin     | Cardiovascular disease; Heart arrhythmia; Class I<br>antiarrhythmic agent                                                                                                                                                   | 100752-33-8 |      | 259     |
| 304    | resveratrol    | Cancer; Cardiovascular disease; Herpes simplex virus<br>infection; Anticancer; Antioxidant agent; Antiviral;<br>Cardioprotectant; DNA modulator                                                                             | 501-36-0    |      | 257     |
| 305    | ribavirin      | Brain injury; Neuroprotectant                                                                                                                                                                                               | 36791-04-5  |      | 172     |
| 306    | ridogrel       | Thromboembolism; Ulcerative colitis; Platelet<br>aggregation inhibitor; Thromboxane A2 antagonist;<br>Thromboxane A2 synthesis inhibitor                                                                                    | 110140-89-1 |      | 70      |
| 307    | rilopirox      | Eczema; Fungal infection; Anti-inflammatory; Chelating<br>agent; Electron transport inhibitor; Fungicide                                                                                                                    | 104153-37-9 |      | 167     |
| 308    | ritanserin     | Anxiety disorder; Depression; Drug dependence;<br>Headache; Psychotic disorder; Antidepressant;<br>Antipsychotic; Anxiolytic                                                                                                | 87051-43-2  |      | 146     |
| 309    | Ro-19-8022     | Anxiety disorder; Anxiolytic                                                                                                                                                                                                | 104604-66-2 |      | 180     |
| 310    | robustaflavone | Hepatitis B virus infection; Antiviral; Viral replication<br>inhibitor                                                                                                                                                      | 49620-13-5  |      | 371     |
| 311    | rolipram       | Asthma; Depression; HIV infection; Multiple sclerosis;<br>Neurodegenerative disease; Tardive dyskinesia;<br>Antidepressant; Bronchodilator; HIV replication inhibitor;<br>Nootropic agent                                   | 61413-54-5  |      | 131     |
| 312    | ropidoxuridine | Cancer; Glioma; Liver tumor; AntiCancer;<br>Radiochemosensitizer; Unspecified drug target                                                                                                                                   | 93265-81-7  | Y    | 165     |
| 313    | rosiglitazone  | Alzheimers disease; Rheumatoid arthritis;<br>Anti-inflammatory; Neuroprotectant; Nootropic agent                                                                                                                            | 122320-73-4 |      | 153     |
| 314    | RP-170         | Carcinoma; Anticancer; Radiochemosensitizer;<br>Unspecified drug target                                                                                                                                                     | 120398-89-2 |      | 88      |
| 315    | RS-8359        | Depression; Antidepressant                                                                                                                                                                                                  | 105365-76-2 |      | 261     |
| 316    | RS-86          | Alzheimers disease; Nootropic agent                                                                                                                                                                                         | 3576-73-6   |      | 53      |
| 317    | RSV-604        | Respiratory syncytial virus infection; Antiviral;<br>Unspecified drug target; Viral replication inhibitor                                                                                                                   | 676128-63-5 | Y    | 244     |
| 318    | rubitecan      | Cancer; Chordoma; Chronic myelocytic leukemia;<br>Colorectal tumor; HIV infection; Non-small-cell lung<br>cancer; Ovary tumor; Pancreas tumor; Small-cell lung<br>cancer; Solid tumor; Stomach tumor; Anticancer; Antiviral | 91421-42-0  | Y    | 187     |
| 319    | RWJ-22108      | Allergy; Asthma; Class IV antiarrhythmic agent                                                                                                                                                                              | 112769-37-6 |      | 159     |

| Number | Common Name           | Indications                                                                                                                                                                                                                                        | CAS Number  | Oral | MP (°C) |
|--------|-----------------------|----------------------------------------------------------------------------------------------------------------------------------------------------------------------------------------------------------------------------------------------------|-------------|------|---------|
| 320    | RWJ-67657             | HIV infection; Inflammatory disease; Parasitic infection;<br>Anti-inflammatory; Antiviral                                                                                                                                                          | 215303-72-3 |      | 124     |
| 321    | R-zacopride           | Emesis; Anti-emetic                                                                                                                                                                                                                                | 123441-85-0 |      | 234     |
| 322    | R-zileuton            | Asthma; Inflammatory disease; Anti-inflammatory;<br>Leukotriene B4 synthesis inhibitor                                                                                                                                                             | 142606-21-1 | Y    | 149     |
| 323    | S-1360                | HIV infection                                                                                                                                                                                                                                      | 280571-30-4 | Y    | 179     |
| 324    | S-2474                | Inflammatory disease; Rheumatoid arthritis;<br>Non-steroidal anti-inflammatory                                                                                                                                                                     | 158089-95-3 |      | 136     |
| 325    | salidroside           | Cardiovascular disease; Cerebrovascular disease;<br>Unspecified drug target                                                                                                                                                                        | 10338-51-9  |      | 160     |
| 326    | satigrel              | Thromboembolism; Platelet aggregation inhibitor                                                                                                                                                                                                    | 111753-73-2 |      | 125     |
| 327    | SB-214111             | Central nervous system disease                                                                                                                                                                                                                     | 209480-37-5 |      | 181     |
| 328    | SB-271046             | Alzheimers disease; Cognitive disorder; Schizophrenia;<br>Antipsychotic                                                                                                                                                                            | 209481-20-9 |      | 241     |
| 329    | scopolamine           | Motion sickness; Anti-emetic                                                                                                                                                                                                                       | 51-34-3     |      | 59      |
| 330    | SCP-123               | Pain; Analgesic; Unspecified drug target                                                                                                                                                                                                           | 775347-33-6 | Y    | 194     |
| 331    | selodenoson           | Atrial fibrillation; Antiarrhythmic agent                                                                                                                                                                                                          | 110299-05-3 |      | 98      |
| 332    | semagacestat          | Alzheimers disease; Beta amyloid synthesis inhibitor;<br>Neuroprotectant; Nootropic agent                                                                                                                                                          | 425386-60-3 | Y    | 210     |
| 333    | semaxanib             | Angiogenesis disorder; Cancer; Colorectal tumor;<br>Kaposi sarcoma; Lung tumor; Melanoma; Multiple<br>myeloma; Myeloid leukemia; Ovarian hyperstimulation<br>syndrome; Solid tumor; Angiogenesis inhibitor;<br>Anticancer protein kinase inhibitor | 194413-58-6 |      | 276     |
| 334    | senicapoc             | Asthma; Immune disorder; Inflammatory disease; Sickle<br>cell anemia; Anti-inflammatory; Blood system agent;<br>Immunomodulator                                                                                                                    | 289656-45-7 | Y    | 181     |
| 335    | simvastatin           | Hypercholesterolemia; Antihypercholesterolemic agent                                                                                                                                                                                               | 79902-63-9  |      | 135     |
| 336    | sirolimus             | Transplant rejection; Immunosuppressant; Protein<br>synthesis inhibitor                                                                                                                                                                            | 53123-88-9  |      | 184     |
| 337    | SL-010                | Cancer; AntiCancer; AntiCancer protein kinase inhibitor                                                                                                                                                                                            | 77307-50-7  |      | 151     |
| 338    | SL-90.0571            | Epilepsy; Anticonvulsant agent                                                                                                                                                                                                                     | 93-14-1     |      | 79      |
| 339    | SM-6586               | Cerebrovascular disease; Hypertension;<br>Antihypertensive                                                                                                                                                                                         | 103898-38-0 |      | 128     |
| 340    | SNS-032               | B-cell lymphoma; Cancer; Solid tumor; Anticancer protein<br>kinase inhibitor; Apoptosis stimulator; Cell cycle inhibitor;<br>Radiosensitizer                                                                                                       | 345627-80-7 |      | 172     |
| 341    | sodium phenylbutyrate | Motor neurone disease; Multiple sclerosis; Spinal<br>muscular atrophy; Neuroprotectant; Nitrogen metabolism<br>modulator                                                                                                                           | 1821-12-1   |      | 50      |
| 342    | sorivudine            | Adult varicella zoster virus infection; Viral replication<br>inhibitor                                                                                                                                                                             | 77181-69-2  |      | 191     |

| Number | Common Name                  | Indications                                                                                                                                                                                     | CAS Number  | Oral | MP (°C) |
|--------|------------------------------|-------------------------------------------------------------------------------------------------------------------------------------------------------------------------------------------------|-------------|------|---------|
| 343    | spirogermanium hydrochloride | Cancer; Multiple sclerosis; Rheumatoid arthritis; Anticancer; Immunomodulator                                                                                                                   | 41992-23-8  |      | 288     |
| 344    | spironolactone               | Acne; Aldosterone antagonist                                                                                                                                                                    | 52-01-7     |      | 188     |
| 345    | SR-12813                     | Atherosclerosis; Hypercholesterolemia; Antihypercholesterolemic agent                                                                                                                           | 126411-39-0 |      | 121     |
| 346    | SRD-174                      | Pruritus; Topical antipruritic product; Unspecified drug target                                                                                                                                 | 55096-26-9  |      | 189     |
| 347    | SU-5271                      | Cancer; Psoriasis; Anticancer; Anticancer protein kinase inhibitor; Systemic antipsoriatic product                                                                                              | 153436-54-5 |      | 189     |
| 348    | sumatriptan                  | Migraine; Analgesic                                                                                                                                                                             | 103628-46-2 |      | 170     |
| 349    | suritazole                   | Alzheimers disease; Dementia; Depression; Antidepressant                                                                                                                                        | 110623-33-1 |      | 127     |
| 350    | S-valproate                  | Cancer; Prostate tumor; AntiCancer; Non-steroidal Anti-inflammatory                                                                                                                             | 882489-97-6 |      | 70      |
| 351    | SY-640                       | Liver disease; Immunosuppressant; Protectant                                                                                                                                                    | 168705-70-2 |      | 103     |
| 352    | T-62                         | Neuropathic pain; Postherpetic neuralgia; Analgesic                                                                                                                                             | 40312-34-3  | Y    | 137     |
| 353    | T-686                        | Atherosclerosis; Antiarteriosclerotic; Unspecified drug target                                                                                                                                  | 152815-51-5 |      | 159     |
| 354    | TAK-029                      | Thromboembolism; Platelet aggregation inhibitor                                                                                                                                                 | 176655-58-6 |      | 278     |
| 355    | TAK-285                      | Cancer; AntiCancer protein kinase inhibitor                                                                                                                                                     | 871026-44-7 | Y    | 168     |
| 356    | TAK-603                      | Bone disease; Crohns disease; Inflammatory disease; Psoriasis; Rheumatoid arthritis; Bone resorption inhibitor; Cytokine synthesis inhibitor; Immunosuppressant; Systemic antipsoriatic product | 158146-85-1 |      | 175     |
| 357    | TAK-715                      | Rheumatoid arthritis; Anti-inflammatory                                                                                                                                                         | 303162-79-0 | Y    | 114     |
| 358    | TAK-778                      | Bone injury; Osteoporosis; Bone metabolism modulator                                                                                                                                            | 180185-61-9 |      | 182     |
| 359    | talnetant                    | Asthma; Chronic obstructive pulmonary disease; Cough; Irritable bowel syndrome; Pain; Schizophrenia; Urinary incontinence; Analgesic; Antipsychotic; Antitussive                                | 174636-32-9 | Y    | 126     |
| 360    | talniflumate                 | Asthma; Chronic obstructive pulmonary disease; Cystic fibrosis; Sinusitis; Mucolytic agent                                                                                                      | 66898-62-2  |      | 166     |
| 361    | tamibarotene                 | Motor neurone disease; Immunomodulator; Neuroprotectant                                                                                                                                         | 94497-51-5  |      | 232     |
| 362    | taranabant                   | Nicotine dependence; Obesity; Appetite suppressant; Cannabinoid CB1 receptor inverse agonist                                                                                                    | 701977-09-5 |      | 106     |
| 363    | TAS-103                      | Cancer; Anticancer                                                                                                                                                                              | 174634-08-3 |      | 217     |
| 364    | tazarotene                   | Acne; Cancer; Psoriasis; Anti-inflammatory; Anticancer; Systemic antipsoriatic product                                                                                                          | 118292-40-3 | Y    | 98      |
| 365    | tebanicline                  | Neuropathic pain; Neuropathy; Pain; Analgesic                                                                                                                                                   | 198283-73-7 |      | 117     |
| 366    | tecastemizole                | Allergic rhinitis; Allergy; Rhinitis; Anti-inflammatory                                                                                                                                         | 75970-99-9  | Y    | 290     |
| 367    | telenzepine                  | Chronic obstructive airway disease; Stomach ulcer                                                                                                                                               | 80880-90-6  |      | 264     |
| 368    | Tempol                       | Hypertension; Antihypertensive; Antioxidant agent                                                                                                                                               | 2226-96-2   |      | 72      |
| 369    | tenidap                      | Rheumatoid arthritis; Non-steroidal anti-inflammatory                                                                                                                                           | 120210-48-2 |      | 230     |

| Number | Common Name               | Indications                                                                                                                                                                                                       | CAS Number  | Oral | MP (°C) |
|--------|---------------------------|-------------------------------------------------------------------------------------------------------------------------------------------------------------------------------------------------------------------|-------------|------|---------|
| 370    | tepoxalin                 | Asthma; Inflammatory disease; Pain; Rheumatoid arthritis; Analgesic; Non-steroidal anti-inflammatory                                                                                                              | 103475-41-8 |      | 126     |
| 371    | terameprocol              | Alzheimers disease; Cancer; Psoriasis; Rheumatoid arthritis; Anticancer                                                                                                                                           | 24150-24-1  | Y    | 102     |
| 372    | terbinafine               | Onychomycosis; Ergosterol synthesis inhibitor; Fungicide; Topical dermatological antifungal product                                                                                                               | 91161-71-6  |      | 204     |
| 373    | testosterone              | Hypogonadism                                                                                                                                                                                                      | 58-22-0     |      | 154     |
| 374    | tetrabenazine             | Tourette syndrome; CNS modulator                                                                                                                                                                                  | 58-46-8     |      | 127     |
| 375    | tetraiodothyroacetic acid | Hypothyroidism                                                                                                                                                                                                    | 67-30-1     |      | 221     |
| 376    | tetrandrine               | Colorectal tumor; Plasmodium malariae infection; Antibacterial multidrug resistance inhibitor; Anticancer multidrug resistance inhibitor                                                                          | 518-34-3    |      | 217     |
| 377    | THE                       | Cardiac failure; Inotropic agent                                                                                                                                                                                  | 53-05-4     |      | 188     |
| 378    | tienoxolol                | Hypertension; Antihypertensive                                                                                                                                                                                    | 90055-97-3  |      | 128     |
| 379    | tilmacoxib                | Familial adenomatous polyposis; Inflammatory disease; Osteoarthritis; Rheumatoid arthritis; Analgesic; Anticancer; Non-steroidal anti-inflammatory                                                                | 180200-68-4 |      | 167     |
| 380    | TLN-4601                  | Cancer; Glioblastoma; Pancreas tumor; Cell cycle inhibitor                                                                                                                                                        | 733035-26-2 |      | 193     |
| 381    | tobramycin                | Bacterial respiratory tract infection; Aminoglycoside antibiotic; Ribosome binding agent                                                                                                                          | 32986-56-4  |      | 191     |
| 382    | tomelukast                | Asthma; Anti-inflammatory; Leukotriene D4 antagonist                                                                                                                                                              | 88107-10-2  |      | 114     |
| 383    | tomopenem                 | Bacterial infection; Beta lactam antibiotic; Carbapenem; Unspecified drug target                                                                                                                                  | 222400-20-6 |      | 243     |
| 384    | topiramate                | Non-insulin dependent diabetes; Obesity                                                                                                                                                                           | 97240-79-4  |      | 126     |
| 385    | torcetrapib               | Atherosclerosis; Hypercholesterolemia; Antihypercholesterolemic agent; HDL cholesterol enhancer                                                                                                                   | 262352-17-0 | Y    | 56      |
| 386    | tramiprosate              | Alzheimers disease; Cerebrovascular disease; Stroke; Amyloid protein deposition inhibitor; Neuroprotectant; Nootropic agent; Vasoprotectant                                                                       | 3687-18-1   | Y    | 287     |
| 387    | triamcinolone acetonide   | Ocular disease; Angiogenesis inhibitor; Corticosteroid agonist                                                                                                                                                    | 76-25-5     |      | 289     |
| 388    | triazolam                 | Insomnia; Hypnotic                                                                                                                                                                                                | 28911-01-5  |      | 234     |
| 389    | tridolgosir               | Arthritis; Asthma; Bacterial infection; Breast tumor; Colorectal tumor; Head and neck tumor; Hepatitis C virus infection; Lung tumor; Renal cell carcinoma; Antibacterial; Anticancer; Antiviral; Chemoprotectant | 72741-87-8  |      | 139     |
| 390    | trimebutine               | Irritable bowel syndrome                                                                                                                                                                                          | 39133-31-8  |      | 79      |

| Number | Common Name   | Indications                                                                                                                                                                                                                                                                                                             | CAS Number  | Oral | MP (°C) |
|--------|---------------|-------------------------------------------------------------------------------------------------------------------------------------------------------------------------------------------------------------------------------------------------------------------------------------------------------------------------|-------------|------|---------|
| 391    | trombodipine  | Atherosclerosis; Restenosis; Thromboembolism;<br>Antiarteriosclerotic; Platelet aggregation inhibitor;<br>Smooth muscle cell proliferation inhibitor; Unspecified<br>drug target; Vasoprotectant                                                                                                                        | 113658-85-8 |      | 145     |
| 392    | ubidecarenone | Cancer; Anticancer                                                                                                                                                                                                                                                                                                      | 303-98-0    |      | 48      |
| 393    | UK-157147     | Alopecia; Asthma; Anti-inflammatory                                                                                                                                                                                                                                                                                     | 162704-20-3 |      | 152     |
| 394    | ulifloxacin   | Bacterial infection; Bacterial nucleic acid synthesis<br>inhibitor                                                                                                                                                                                                                                                      | 112984-60-8 | Y    | 217     |
| 395    | ulodesine     | Autoimmune disease; Gout; Hematological neoplasm;<br>Immune disorder; Psoriasis; Transplant rejection;<br>Anti-inflammatory; Anticancer; Apoptosis stimulator;<br>Synergist; Systemic antipsoriatic product; Uric acid<br>modulator                                                                                     | 548486-59-5 | Y    | 249     |
| 396    | vadimezan     | Bladder cancer; Breast tumor; Non-small-cell lung<br>cancer; Ovary tumor; Prostate tumor; Small-cell lung<br>cancer; Solid tumor; Anticancer; Apoptosis stimulator;<br>Vascular damaging agent                                                                                                                          | 117570-53-3 |      | 260     |
| 397    | valproic acid | Attention deficit hyperactivity disorder; Fragile X<br>syndrome; Psychomodulator                                                                                                                                                                                                                                        | 99-66-1     |      | 25      |
| 398    | vamicamide    | Neurogenic bladder; Pollakiuria                                                                                                                                                                                                                                                                                         | 132373-81-0 |      | 145     |
| 399    | vatalanib     | Acute myelogenous leukemia; Age related macular<br>degeneration; Cancer; Carcinoma; Colorectal tumor;<br>Glioblastoma; Kaposi sarcoma; Meningioma;<br>Myelodysplastic syndrome; Non-small-cell lung cancer;<br>Ovary tumor; Prostate tumor; Solid tumor; Angiogenesis<br>inhibitor; Anticancer protein kinase inhibitor | 212141-54-3 | Y    | 211     |
| 400    | velifapon     | Asthma; Myocardial infarction; Cardioprotectant;<br>Leukotriene B4 synthesis inhibitor; Non-steroidal<br>anti-inflammatory                                                                                                                                                                                              | 128253-31-6 |      | 170     |
| 401    | VGX-1027      | Psoriasis; Anti-inflammatory; Cytokine synthesis inhibitor;<br>Topical antipsoriatic product                                                                                                                                                                                                                            | 6501-72-0   |      | 158     |
| 402    | vinconate     | Alzheimers disease; Amnesia; Cerebral infarction;<br>Cognitive disorder; Dementia; Neuroprotectant;<br>Nootropic agent; Unspecified drug target                                                                                                                                                                         | 70704-03-9  |      | 120     |
| 403    | vorinostat    | Cancer; Anticancer                                                                                                                                                                                                                                                                                                      | 149647-78-9 |      | 160     |
| 404    | VX-105        | Beta thalassemia; Hemoglobinopathy; Sickle cell anemia                                                                                                                                                                                                                                                                  | 74-79-3     |      | 246     |
| 405    | VX-366        | Beta thalassemia; Hemoglobinopathy; Sickle cell anemia                                                                                                                                                                                                                                                                  | 563-83-7    |      | 124     |
| 406    | VX-745        | Myelodysplastic syndrome; Neurological disease;<br>Rheumatoid arthritis; Anticancer; Immunomodulator;<br>Neuroprotectant                                                                                                                                                                                                | 209410-46-8 |      | 263     |
| 407    | xenalipin     | Hyperlipidemia; Antihypercholesterolemic agent                                                                                                                                                                                                                                                                          | 84392-17-6  |      | 168     |
| 408    | YM-022        | Peptic ulcer; Ulcer                                                                                                                                                                                                                                                                                                     | 145084-28-2 |      | 189     |



| Number | Common Name       | Indications                                                                                   | CAS Number  | Oral | MP (°C) |
|--------|-------------------|-----------------------------------------------------------------------------------------------|-------------|------|---------|
| 409    | YM-16151-4        | Angina; Heart arrhythmia; Class II antiarrhythmic agent;<br>Class IV antiarrhythmic agent     | 103434-38-4 |      | 145     |
| 410    | YT-146            | Hypertension; Restenosis; Antihypertensive; Cytokine<br>release inhibitor; Vasoprotectant     | 90596-75-1  |      | 101     |
| 411    | zaldaride         | Diarrhea                                                                                      | 109826-26-8 |      | 187     |
| 412    | zaleplon          | Insomnia; Hypnotic                                                                            | 151319-34-5 |      | 185     |
| 413    | zanoterone        | Carcinoma; Prostate hyperplasia; Prostate tumor;<br>Anticancer; Anticancer hormone antagonist | 107000-34-0 |      | 201     |
| 414    | zileuton          | Asthma; Anti-inflammatory; Leukotriene B4 synthesis<br>inhibitor                              | 111406-87-2 |      | 158     |
| 415    | zindoxifene       | Breast tumor; Anticancer                                                                      | 86111-26-4  |      | 147     |
| 416    | zolpidem tartrate | Insomnia; Hypnotic                                                                            | 82626-48-0  | Y    | 195     |
| 417    | zopolrestat       | Diabetic complication; Neuropathy; Retinopathy                                                | 110703-94-1 |      | 198     |

"Y" represented the drug was administered orally.
